# Supplementary material for: PRKG2 Splice Site Variant in Dogo Argentino Dogs with Disproportionate Dwarfism
Source: MDPI journal article supplement (doi:10.3390/genes12101489), 2021-09-24
Supplement: s1 [file s1]

**A**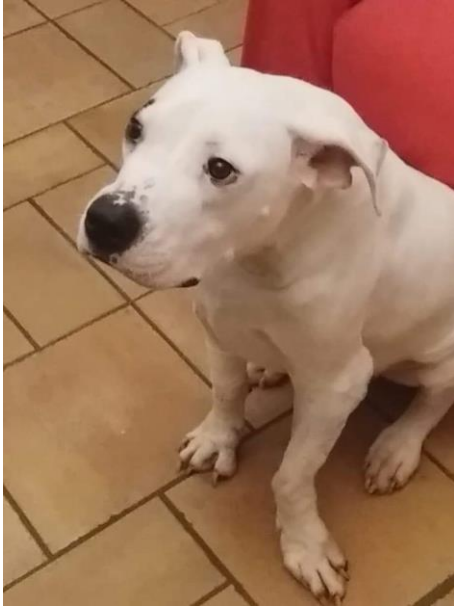**B**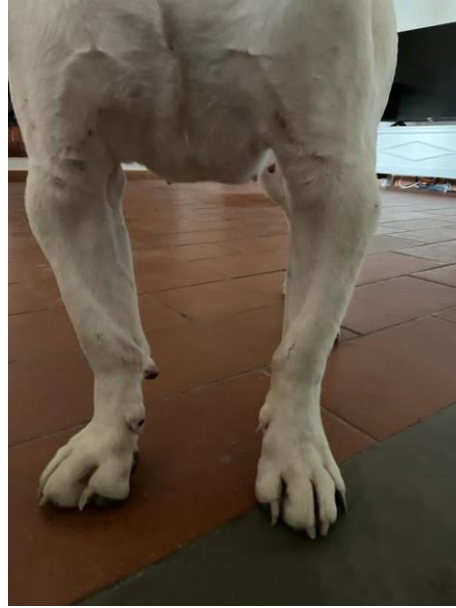

**Figure S1.** Clinical phenotype of the affected female dog (DG0005). **(A)** This dog had short limbs with angular deformities and an outward rotation of the paws. **(B)** Frontal view of the shortened forelimbs.
