# Supplementary material for: PRKG2 Splice Site Variant in Dogo Argentino Dogs with Disproportionate Dwarfism
Source: Genes (Basel). 2021 Sep 24;12(10):1489. doi: 10.3390/genes12101489 (PMC8535654; doi:10.3390/genes12101489)
Supplement: Supplementary file 1 [file genes-12-01489-s001.zip]

Archive with 6 entries (6 files):
- FigureS1_R1.pdf
- File_S1.zip
- Table_S1_linkage_and_homozygosity___R1.xlsx
- Table_S2_Private_Variants.xlsx
- Table_S3_Public_Genomes.xlsx
- Table_S4_Morphometric_Measurements.xlsx
