# Supplementary material for: PRKG2 Splice Site Variant in Dogo Argentino Dogs with Disproportionate Dwarfism
Source: Genes (Basel). 2021 Sep 24;12(10):1489. doi: 10.3390/genes12101489 (PMC8535654; doi:10.3390/genes12101489)
Supplement: Supplementary file 1 [file genes-12-01489-s001.zip › Table_S1_linkage_and_homozygosity___R1.xlsx]

## Sheet: intersect homozygosity linkage
Table S1. Genome consensus regions that were homozygous in 2 cases and showed linkage to the disease in the family. The coordinates were derived by visual inspection of the SNV chip genotypes for each of the 2 cases and refer to the CanFam3.1 genome reference assembly.
Chromosome	start position	marker	stop position	marker	size critical interval (bp)
3	10124210	BICF2S23319505	17958818	BICF2G630703951	7834608
3	49737076	BICF2S23520724	56469761	CHR3_56469761	6732685
3	74113390	BICF2S22957553	78483318	TIGRP2P53115_RS9188435	4369928
4	73799069	TIGRP2P65556_RS9006124	75369047	BICF2G630170528	1569978
7	38780682	BICF2P182316	40701261	CHR7_40701261	1920579
8	39203005	BICF2P944718	42749955	BICF2S23219794	3546950
8	49571425	BICF2S23762501	50927492	BICF2P1067456	1356067
9	28083754	BICF2G630832768	37414547	BICF2P184510	9330793
9	39154819	BICF2P517968	40306270	TIGRP2P127079_RS8900577	1151451
9	46202915	BICF2P1019720	48721031	TIGRP2P129192_RS8703617	2518116
12	1	-	2863511	BICF2P105897	2863510
12	9336752	TIGRP2P156810_RS8548284	11037329	TIGRP2P157274_RS8532080	1700577
12	14378498	CHR12_14378498	19123799	BICF2P1355271	4745301
13	42955148	BICF2P1181050	43132851	BICF2P1039881	177703
15	1	-	13802408	CHR15_13802408	13802407
15	19441430	BICF2S23041804	21750507	TIGRP2P197741_RS9204050	2309077
17	5095830	BICF2P28136	7067777	BICF2S23417635	1971947
17	10838357	BICF2S2328557	12121641	BICF2G630219331	1283284
17	16908137	BICF2P145909	21703419	CHR17_21703419	4795282
17	46796899	BICF2P1211972	47872313	BICF2G630203383	1075414
18	38723578	CHR18_38723578	43549596	BICF2P258864	4826018
20	45462481	CHR20_45462481	48291964	BICF2P1277815	2829483
20	50464885	BICF2G630448103	51541862	BICF2P257221	1076977
22	41775166	BICF2P1215505	41961330	BICF2S23044530	186164
22	47783017	BICF2G630334655	47795893	BICF2G630334679	12876
23	47433551	BICF2G630366450	50710088	CHR23_50710088	3276537
26	27708711	CHR26_27708711	29211703	G1320F74S244	1502992
28	27201623	CHR28_27201623	28961290	BICF2P178359	1759667
29	1	-	7334861	BICF2P1283214	7334860
29	17759400	BICF2S2331310	22680843	BICF2P886354	4921443
31	25994824	BICF2S2358400	26289113	BICF2P1011441	294289
31	26353289	BICF2P1397606	28462791	CHR31_28462791	2109502
32	4378599	BICF2G630601052	23485679	BICF2G630589140	19107080
34	38153239	BICF2G630449375	39320622	BICF2P319219	1167383
				total critical interval (bp):	125460928

## Sheet: raw homozygous regions
Table S1. Raw Plink output for homozygosity analysis.
POOL	FID	IID	PHE	CHR	SNP1	SNP2	BP1	BP2	KB	NSNP	NSIM	GRP
S1	DG0003	DG0003	-9	1	BICF2P1328116	BICF2S2327284	10444637	24024856	13580.2	1241	1	1*
S1	DG0005	DG0005	-9	1	BICF2P798939	BICF2G630716107	16844869	29082710	12237.8	1156	1	1
S1	CON	2	00:02:00	1	BICF2P798939	BICF2S2327284	16844869	24024856	7179.99	688	NA	NA
S1	UNION	2	00:02:00	1	BICF2P1328116	BICF2G630716107	10444637	29082710	18638.1	1709	NA	NA
S2	DG0003	DG0003	-9	1	BICF2G630716186	CHR1_30724878	29448880	30724878	1276	121	1	1*
S2	DG0005	DG0005	-9	1	BICF2S23256780	CHR1_30724878	29250013	30724878	1474.87	138	1	1
S2	CON	2	00:02:00	1	BICF2G630716186	CHR1_30724878	29448880	30724878	1276	121	NA	NA
S2	UNION	2	00:02:00	1	BICF2S23256780	CHR1_30724878	29250013	30724878	1474.87	138	NA	NA
S3	DG0003	DG0003	-9	1	BICF2P633682	BICF2P742089	41525389	71391400	29866	2789	1	1*
S3	DG0005	DG0005	-9	1	CHR1_48530329	BICF2P578537	48530329	54136386	5606.06	542	1	1
S3	CON	2	00:02:00	1	CHR1_48530329	BICF2P578537	48530329	54136386	5606.06	542	NA	NA
S3	UNION	2	00:02:00	1	BICF2P633682	BICF2P742089	41525389	71391400	29866	2789	NA	NA
S4	DG0003	DG0003	-9	1	BICF2P633682	BICF2P742089	41525389	71391400	29866	2789	1	1*
S4	DG0005	DG0005	-9	1	G44F1S211	BICF2P1119841	69582043	74523380	4941.34	403	1	1
S4	CON	2	00:02:00	1	G44F1S211	BICF2P742089	69582043	71391400	1809.36	153	NA	NA
S4	UNION	2	00:02:00	1	BICF2P633682	BICF2P1119841	41525389	74523380	32998	3039	NA	NA
S5	DG0003	DG0003	-9	1	BICF2G630788719	TIGRP2P14472_RS9132036	95688485	105372111	9683.63	863	1	1*
S5	DG0005	DG0005	-9	1	BICF2P1380146	BICF2S23349027	90691275	103700648	13009.4	1216	1	1
S5	CON	2	00:02:00	1	BICF2G630788719	BICF2S23349027	95688485	103700648	8012.16	745	NA	NA
S5	UNION	2	00:02:00	1	BICF2P1380146	TIGRP2P14472_RS9132036	90691275	105372111	14680.8	1334	NA	NA
S6	DG0003	DG0003	-9	1	CHR1_108195640	BICF2P1376620	108195640	120357362	12161.7	1439	1	1*
S6	DG0005	DG0005	-9	1	CHR1_110722740	BICF2P1461971	110722740	112988713	2265.97	306	1	1
S6	CON	2	00:02:00	1	CHR1_110722740	BICF2P1461971	110722740	112988713	2265.97	306	NA	NA
S6	UNION	2	00:02:00	1	CHR1_108195640	BICF2P1376620	108195640	120357362	12161.7	1439	NA	NA
S7	DG0003	DG0003	-9	1	CHR1_108195640	BICF2P1376620	108195640	120357362	12161.7	1439	1	1*
S7	DG0005	DG0005	-9	1	BICF2P272266	BICF2P1319030	118060464	120216234	2155.77	243	1	1
S7	CON	2	00:02:00	1	BICF2P272266	BICF2P1319030	118060464	120216234	2155.77	243	NA	NA
S7	UNION	2	00:02:00	1	CHR1_108195640	BICF2P1376620	108195640	120357362	12161.7	1439	NA	NA
S8	DG0003	DG0003	-9	3	BICF2S23319505	BICF2G630706686	10124210	31215627	21091.4	1882	1	1*
S8	DG0005	DG0005	-9	3	BICF2S23319505	TIGRP2P39005_RS8875213	10124210	19990646	9866.44	886	1	1
S8	CON	2	00:02:00	3	BICF2S23319505	TIGRP2P39005_RS8875213	10124210	19990646	9866.44	886	NA	NA
S8	UNION	2	00:02:00	3	BICF2S23319505	BICF2G630706686	10124210	31215627	21091.4	1882	NA	NA
S9	DG0003	DG0003	-9	3	BICF2G630707075	BICF2P728233	31401666	70981184	39579.5	3656	1	1*
S9	DG0005	DG0005	-9	3	BICF2S23520724	CHR3_56469761	49737076	56469761	6732.69	707	1	1
S9	CON	2	00:02:00	3	BICF2S23520724	CHR3_56469761	49737076	56469761	6732.69	707	NA	NA
S9	UNION	2	00:02:00	3	BICF2G630707075	BICF2P728233	31401666	70981184	39579.5	3656	NA	NA
S10	DG0003	DG0003	-9	3	BICF2G630707075	BICF2P728233	31401666	70981184	39579.5	3656	1	1*
S10	DG0005	DG0005	-9	3	BICF2P1073727	BICF2P896521	64328805	70243866	5915.06	579	1	1
S10	CON	2	00:02:00	3	BICF2P1073727	BICF2P896521	64328805	70243866	5915.06	579	NA	NA
S10	UNION	2	00:02:00	3	BICF2G630707075	BICF2P728233	31401666	70981184	39579.5	3656	NA	NA
S11	DG0003	DG0003	-9	3	BICF2S22957553	TIGRP2P53115_RS9188435	74113390	78483318	4369.93	412	1	1*
S11	DG0005	DG0005	-9	3	BICF2S22957553	TIGRP2P53115_RS9188435	74113390	78483318	4369.93	412	1	1
S11	CON	2	00:02:00	3	BICF2S22957553	TIGRP2P53115_RS9188435	74113390	78483318	4369.93	412	NA	NA
S11	UNION	2	00:02:00	3	BICF2S22957553	TIGRP2P53115_RS9188435	74113390	78483318	4369.93	412	NA	NA
S12	DG0003	DG0003	-9	4	BICF2G63059804	CHR4_20519050	7217853	20519050	13301.2	1231	1	1*
S12	DG0005	DG0005	-9	4	BICF2G63059708	BICF2S23350717	7012308	8031926	1019.62	108	1	1
S12	CON	2	00:02:00	4	BICF2G63059804	BICF2S23350717	7217853	8031926	814.074	88	NA	NA
S12	UNION	2	00:02:00	4	BICF2G63059708	CHR4_20519050	7012308	20519050	13506.7	1251	NA	NA
S13	DG0003	DG0003	-9	4	BICF2G63059804	CHR4_20519050	7217853	20519050	13301.2	1231	1	1*
S13	DG0005	DG0005	-9	4	BICF2P355122	BICF2P1203353	15504722	17446015	1941.29	148	1	1
S13	CON	2	00:02:00	4	BICF2P355122	BICF2P1203353	15504722	17446015	1941.29	148	NA	NA
S13	UNION	2	00:02:00	4	BICF2G63059804	CHR4_20519050	7217853	20519050	13301.2	1231	NA	NA
S14	DG0003	DG0003	-9	4	BICF2G63059804	CHR4_20519050	7217853	20519050	13301.2	1231	1	1*
S14	DG0005	DG0005	-9	4	BICF2P197533	CHR4_20519050	17517523	20519050	3001.53	284	1	1
S14	CON	2	00:02:00	4	BICF2P197533	CHR4_20519050	17517523	20519050	3001.53	284	NA	NA
S14	UNION	2	00:02:00	4	BICF2G63059804	CHR4_20519050	7217853	20519050	13301.2	1231	NA	NA
S15	DG0003	DG0003	-9	4	BICF2P1169799	BICF2P186826	42720741	51484621	8763.88	749	1	1*
S15	DG0005	DG0005	-9	4	BICF2P1169799	BICF2P950471	42720741	52903599	10182.9	879	1	1
S15	CON	2	00:02:00	4	BICF2P1169799	BICF2P186826	42720741	51484621	8763.88	749	NA	NA
S15	UNION	2	00:02:00	4	BICF2P1169799	BICF2P950471	42720741	52903599	10182.9	879	NA	NA
S16	DG0003	DG0003	-9	4	TIGRP2P63547_RS9070052	BICF2P759986	52824753	54319730	1494.98	134	1	1*
S16	DG0005	DG0005	-9	4	BICF2P1169799	BICF2P950471	42720741	52903599	10182.9	879	1	1
S16	CON	2	00:02:00	4	TIGRP2P63547_RS9070052	BICF2P950471	52824753	52903599	78.847	11	NA	NA
S16	UNION	2	00:02:00	4	BICF2P1169799	BICF2P759986	42720741	54319730	11599	1002	NA	NA
S17	DG0003	DG0003	-9	4	BICF2G630169230	BICF2P17577	73084405	82121738	9037.33	783	1	1*
S17	DG0005	DG0005	-9	4	TIGRP2P65556_RS9006124	BICF2G630170528	73799069	75369047	1569.98	142	1	1
S17	CON	2	00:02:00	4	TIGRP2P65556_RS9006124	BICF2G630170528	73799069	75369047	1569.98	142	NA	NA
S17	UNION	2	00:02:00	4	BICF2G630169230	BICF2P17577	73084405	82121738	9037.33	783	NA	NA
S18	DG0003	DG0003	-9	5	BICF2S23410489	BICF2G630185992	27669801	38065679	10395.9	1126	1	1*
S18	DG0005	DG0005	-9	5	BICF2P1163372	BICF2P183793	28116561	47605224	19488.7	1971	1	1
S18	CON	2	00:02:00	5	BICF2P1163372	BICF2G630185992	28116561	38065679	9949.12	1076	NA	NA
S18	UNION	2	00:02:00	5	BICF2S23410489	BICF2P183793	27669801	47605224	19935.4	2021	NA	NA
S19	DG0003	DG0003	-9	5	BICF2P1411748	BICF2S23243433	55822677	75044638	19222	2034	1	1*
S19	DG0005	DG0005	-9	5	BICF2S23612325	CHR5_61485254	58069067	61485254	3416.19	356	1	1
S19	CON	2	00:02:00	5	BICF2S23612325	CHR5_61485254	58069067	61485254	3416.19	356	NA	NA
S19	UNION	2	00:02:00	5	BICF2P1411748	BICF2S23243433	55822677	75044638	19222	2034	NA	NA
S20	DG0003	DG0003	-9	7	BICF2P182316	CHR7_40701261	38780682	40701261	1920.58	204	1	1*
S20	DG0005	DG0005	-9	7	BICF2P182316	CHR7_40701261	38780682	40701261	1920.58	204	1	1
S20	CON	2	00:02:00	7	BICF2P182316	CHR7_40701261	38780682	40701261	1920.58	204	NA	NA
S20	UNION	2	00:02:00	7	BICF2P182316	CHR7_40701261	38780682	40701261	1920.58	204	NA	NA
S21	DG0003	DG0003	-9	8	CHR8_30885	TIGRP2P106791_RS8936350	30885	7831912	7801.03	703	1	1*
S21	DG0005	DG0005	-9	8	CHR8_30885	TIGRP2P106791_RS8936350	30885	7831912	7801.03	703	1	1
S21	CON	2	00:02:00	8	CHR8_30885	TIGRP2P106791_RS8936350	30885	7831912	7801.03	703	NA	NA
S21	UNION	2	00:02:00	8	CHR8_30885	TIGRP2P106791_RS8936350	30885	7831912	7801.03	703	NA	NA
S22	DG0003	DG0003	-9	8	BICF2P944718	BICF2S23219794	39203005	42749955	3546.95	291	1	1*
S22	DG0005	DG0005	-9	8	CHR8_31027939	BICF2P803787	31027939	43823892	12796	1101	1	1
S22	CON	2	00:02:00	8	BICF2P944718	BICF2S23219794	39203005	42749955	3546.95	291	NA	NA
S22	UNION	2	00:02:00	8	CHR8_31027939	BICF2P803787	31027939	43823892	12796	1101	NA	NA
S23	DG0003	DG0003	-9	8	BICF2S23762501	BICF2P1067456	49571425	50927492	1356.07	139	1	1*
S23	DG0005	DG0005	-9	8	BICF2S23762501	TIGRP2P115684_RS9110889	49571425	51125787	1554.36	153	1	1
S23	CON	2	00:02:00	8	BICF2S23762501	BICF2P1067456	49571425	50927492	1356.07	139	NA	NA
S23	UNION	2	00:02:00	8	BICF2S23762501	TIGRP2P115684_RS9110889	49571425	51125787	1554.36	153	NA	NA
S24	DG0003	DG0003	-9	9	BICF2P1444473	BICF2P207992	13741	2743784	2730.04	261	1	1*
S24	DG0005	DG0005	-9	9	BICF2P1444473	BICF2P207992	13741	2743784	2730.04	261	1	1
S24	CON	2	00:02:00	9	BICF2P1444473	BICF2P207992	13741	2743784	2730.04	261	NA	NA
S24	UNION	2	00:02:00	9	BICF2P1444473	BICF2P207992	13741	2743784	2730.04	261	NA	NA
S25	DG0003	DG0003	-9	9	BICF2G630832768	BICF2G630840052	28083754	40483297	12399.5	1176	1	1*
S25	DG0005	DG0005	-9	9	BICF2G630830012	BICF2P184510	21132414	37414547	16282.1	1621	1	1
S25	CON	2	00:02:00	9	BICF2G630832768	BICF2P184510	28083754	37414547	9330.79	855	NA	NA
S25	UNION	2	00:02:00	9	BICF2G630830012	BICF2G630840052	21132414	40483297	19350.9	1942	NA	NA
S26	DG0003	DG0003	-9	9	BICF2G630832768	BICF2G630840052	28083754	40483297	12399.5	1176	1	1*
S26	DG0005	DG0005	-9	9	BICF2P517968	TIGRP2P127079_RS8900577	39154819	40306270	1151.45	107	1	1
S26	CON	2	00:02:00	9	BICF2P517968	TIGRP2P127079_RS8900577	39154819	40306270	1151.45	107	NA	NA
S26	UNION	2	00:02:00	9	BICF2G630832768	BICF2G630840052	28083754	40483297	12399.5	1176	NA	NA
S27	DG0003	DG0003	-9	9	BICF2P1019720	TIGRP2P129192_RS8703617	46202915	48721031	2518.12	322	1	1*
S27	DG0005	DG0005	-9	9	BICF2P1019720	TIGRP2P129192_RS8703617	46202915	48721031	2518.12	322	1	1
S27	CON	2	00:02:00	9	BICF2P1019720	TIGRP2P129192_RS8703617	46202915	48721031	2518.12	322	NA	NA
S27	UNION	2	00:02:00	9	BICF2P1019720	TIGRP2P129192_RS8703617	46202915	48721031	2518.12	322	NA	NA
S28	DG0003	DG0003	-9	10	BICF2G630487686	CHR10_41276755	38882735	41276755	2394.02	240	1	1*
S28	DG0005	DG0005	-9	10	BICF2G630487686	BICF2P566462	38882735	56697592	17814.9	1612	1	1
S28	CON	2	00:02:00	10	BICF2G630487686	CHR10_41276755	38882735	41276755	2394.02	240	NA	NA
S28	UNION	2	00:02:00	10	BICF2G630487686	BICF2P566462	38882735	56697592	17814.9	1612	NA	NA
S29	DG0003	DG0003	-9	10	BICF2S2451230	BICF2P116818	50291015	52396984	2105.97	185	1	1*
S29	DG0005	DG0005	-9	10	BICF2G630487686	BICF2P566462	38882735	56697592	17814.9	1612	1	1
S29	CON	2	00:02:00	10	BICF2S2451230	BICF2P116818	50291015	52396984	2105.97	185	NA	NA
S29	UNION	2	00:02:00	10	BICF2G630487686	BICF2P566462	38882735	56697592	17814.9	1612	NA	NA
S30	DG0003	DG0003	-9	10	BICF2P298375	BICF2P159108	62384307	63756901	1372.6	100	1	1*
S30	DG0005	DG0005	-9	10	BICF2P298375	BICF2P159108	62384307	63756901	1372.6	100	1	1
S30	CON	2	00:02:00	10	BICF2P298375	BICF2P159108	62384307	63756901	1372.6	100	NA	NA
S30	UNION	2	00:02:00	10	BICF2P298375	BICF2P159108	62384307	63756901	1372.6	100	NA	NA
S31	DG0003	DG0003	-9	11	CHRUN_JH373300_107533	BICF2P748969	34058	4600957	4566.9	365	1	1*
S31	DG0005	DG0005	-9	11	CHRUN_JH373300_107533	BICF2P748969	34058	4600957	4566.9	365	1	1
S31	CON	2	00:02:00	11	CHRUN_JH373300_107533	BICF2P748969	34058	4600957	4566.9	365	NA	NA
S31	UNION	2	00:02:00	11	CHRUN_JH373300_107533	BICF2P748969	34058	4600957	4566.9	365	NA	NA
S32	DG0003	DG0003	-9	12	BICF2P391911	CHR12_5756914	3991	5756914	5752.92	858	1	1*
S32	DG0005	DG0005	-9	12	BICF2P391911	BICF2P105897	3991	2863511	2859.52	569	1	1
S32	CON	2	00:02:00	12	BICF2P391911	BICF2P105897	3991	2863511	2859.52	569	NA	NA
S32	UNION	2	00:02:00	12	BICF2P391911	CHR12_5756914	3991	5756914	5752.92	858	NA	NA
S33	DG0003	DG0003	-9	12	TIGRP2P156810_RS8548284	TIGRP2P157274_RS8532080	9336752	11037329	1700.58	197	1	1*
S33	DG0005	DG0005	-9	12	TIGRP2P156810_RS8548284	TIGRP2P157274_RS8532080	9336752	11037329	1700.58	197	1	1
S33	CON	2	00:02:00	12	TIGRP2P156810_RS8548284	TIGRP2P157274_RS8532080	9336752	11037329	1700.58	197	NA	NA
S33	UNION	2	00:02:00	12	TIGRP2P156810_RS8548284	TIGRP2P157274_RS8532080	9336752	11037329	1700.58	197	NA	NA
S34	DG0003	DG0003	-9	12	CHR12_14378498	BICF2P1355271	14378498	19123799	4745.3	452	1	1*
S34	DG0005	DG0005	-9	12	CHR12_14378498	BICF2P1355271	14378498	19123799	4745.3	452	1	1
S34	CON	2	00:02:00	12	CHR12_14378498	BICF2P1355271	14378498	19123799	4745.3	452	NA	NA
S34	UNION	2	00:02:00	12	CHR12_14378498	BICF2P1355271	14378498	19123799	4745.3	452	NA	NA
S35	DG0003	DG0003	-9	13	BICF2P456452	CHR13_47429689	34181244	47429689	13248.4	1234	1	1*
S35	DG0005	DG0005	-9	13	BICF2P1181050	BICF2G630745029	42955148	62587169	19632	1820	1	1
S35	CON	2	00:02:00	13	BICF2P1181050	CHR13_47429689	42955148	47429689	4474.54	441	NA	NA
S35	UNION	2	00:02:00	13	BICF2P456452	BICF2G630745029	34181244	62587169	28405.9	2613	NA	NA
S36	DG0003	DG0003	-9	13	BICF2P605557	BICF2P326486	54238247	55675634	1437.39	113	1	1*
S36	DG0005	DG0005	-9	13	BICF2P1181050	BICF2G630745029	42955148	62587169	19632	1820	1	1
S36	CON	2	00:02:00	13	BICF2P605557	BICF2P326486	54238247	55675634	1437.39	113	NA	NA
S36	UNION	2	00:02:00	13	BICF2P1181050	BICF2G630745029	42955148	62587169	19632	1820	NA	NA
S37	DG0003	DG0003	-9	15	TIGRP2P208023_RS9062185	BICF2G630433003	23199	29952709	29929.5	2586	1	1*
S37	DG0005	DG0005	-9	15	TIGRP2P208023_RS9062185	CHR15_13802408	23199	13802408	13779.2	1110	1	1
S37	CON	2	00:02:00	15	TIGRP2P208023_RS9062185	CHR15_13802408	23199	13802408	13779.2	1110	NA	NA
S37	UNION	2	00:02:00	15	TIGRP2P208023_RS9062185	BICF2G630433003	23199	29952709	29929.5	2586	NA	NA
S38	DG0003	DG0003	-9	15	TIGRP2P208023_RS9062185	BICF2G630433003	23199	29952709	29929.5	2586	1	1*
S38	DG0005	DG0005	-9	15	BICF2S23041804	BICF2G630431577	19441430	31927976	12486.5	1088	1	1
S38	CON	2	00:02:00	15	BICF2S23041804	BICF2G630433003	19441430	29952709	10511.3	908	NA	NA
S38	UNION	2	00:02:00	15	TIGRP2P208023_RS9062185	BICF2G630431577	23199	31927976	31904.8	2766	NA	NA
S39	DG0003	DG0003	-9	15	BICF2P1322709	BICF2G630423507	30017427	55237009	25219.6	2320	1	1*
S39	DG0005	DG0005	-9	15	BICF2S23041804	BICF2G630431577	19441430	31927976	12486.5	1088	1	1
S39	CON	2	00:02:00	15	BICF2P1322709	BICF2G630431577	30017427	31927976	1910.55	176	NA	NA
S39	UNION	2	00:02:00	15	BICF2S23041804	BICF2G630423507	19441430	55237009	35795.6	3232	NA	NA
S40	DG0003	DG0003	-9	15	BICF2P1322709	BICF2G630423507	30017427	55237009	25219.6	2320	1	1*
S40	DG0005	DG0005	-9	15	BICF2P112992	BICF2S23432817	37656381	44107722	6451.34	581	1	1
S40	CON	2	00:02:00	15	BICF2P112992	BICF2S23432817	37656381	44107722	6451.34	581	NA	NA
S40	UNION	2	00:02:00	15	BICF2P1322709	BICF2G630423507	30017427	55237009	25219.6	2320	NA	NA
S41	DG0003	DG0003	-9	15	BICF2P1322709	BICF2G630423507	30017427	55237009	25219.6	2320	1	1*
S41	DG0005	DG0005	-9	15	BICF2P755365	BICF2G630428530	44490541	47101295	2610.76	234	1	1
S41	CON	2	00:02:00	15	BICF2P755365	BICF2G630428530	44490541	47101295	2610.76	234	NA	NA
S41	UNION	2	00:02:00	15	BICF2P1322709	BICF2G630423507	30017427	55237009	25219.6	2320	NA	NA
S42	DG0003	DG0003	-9	15	BICF2P1322709	BICF2G630423507	30017427	55237009	25219.6	2320	1	1*
S42	DG0005	DG0005	-9	15	CHR15_50817286	BICF2G630425502	50817286	53263757	2446.47	257	1	1
S42	CON	2	00:02:00	15	CHR15_50817286	BICF2G630425502	50817286	53263757	2446.47	257	NA	NA
S42	UNION	2	00:02:00	15	BICF2P1322709	BICF2G630423507	30017427	55237009	25219.6	2320	NA	NA
S43	DG0003	DG0003	-9	16	CHR16_53983420	BICF2P94327	53983420	57713342	3729.92	312	1	1*
S43	DG0005	DG0005	-9	16	BICF2P101897	BICF2P94327	55661745	57713342	2051.6	165	1	1
S43	CON	2	00:02:00	16	BICF2P101897	BICF2P94327	55661745	57713342	2051.6	165	NA	NA
S43	UNION	2	00:02:00	16	CHR16_53983420	BICF2P94327	53983420	57713342	3729.92	312	NA	NA
S44	DG0003	DG0003	-9	17	BICF2P28136	BICF2S23417635	5095830	7067777	1971.95	167	1	1*
S44	DG0005	DG0005	-9	17	BICF2P28136	BICF2S23417635	5095830	7067777	1971.95	167	1	1
S44	CON	2	00:02:00	17	BICF2P28136	BICF2S23417635	5095830	7067777	1971.95	167	NA	NA
S44	UNION	2	00:02:00	17	BICF2P28136	BICF2S23417635	5095830	7067777	1971.95	167	NA	NA
S45	DG0003	DG0003	-9	17	BICF2S2328557	BICF2G630219331	10838357	12121641	1283.29	125	1	1*
S45	DG0005	DG0005	-9	17	BICF2S2328557	BICF2G630219331	10838357	12121641	1283.29	125	1	1
S45	CON	2	00:02:00	17	BICF2S2328557	BICF2G630219331	10838357	12121641	1283.29	125	NA	NA
S45	UNION	2	00:02:00	17	BICF2S2328557	BICF2G630219331	10838357	12121641	1283.29	125	NA	NA
S46	DG0003	DG0003	-9	17	BICF2P145909	CHR17_21703419	16908137	21703419	4795.28	498	1	1*
S46	DG0005	DG0005	-9	17	BICF2P145909	CHR17_21703419	16908137	21703419	4795.28	498	1	1
S46	CON	2	00:02:00	17	BICF2P145909	CHR17_21703419	16908137	21703419	4795.28	498	NA	NA
S46	UNION	2	00:02:00	17	BICF2P145909	CHR17_21703419	16908137	21703419	4795.28	498	NA	NA
S47	DG0003	DG0003	-9	17	BICF2P1211972	BICF2G630203383	46796899	47872313	1075.41	102	1	1*
S47	DG0005	DG0005	-9	17	BICF2P1211972	BICF2G630203383	46796899	47872313	1075.41	102	1	1
S47	CON	2	00:02:00	17	BICF2P1211972	BICF2G630203383	46796899	47872313	1075.41	102	NA	NA
S47	UNION	2	00:02:00	17	BICF2P1211972	BICF2G630203383	46796899	47872313	1075.41	102	NA	NA
S48	DG0003	DG0003	-9	18	CHR18_38659	BICF2P480004	38659	27907379	27868.7	2365	1	1*
S48	DG0005	DG0005	-9	18	BICF2P214232	BICF2P1050447	11548611	12685270	1136.66	123	1	1
S48	CON	2	00:02:00	18	BICF2P214232	BICF2P1050447	11548611	12685270	1136.66	123	NA	NA
S48	UNION	2	00:02:00	18	CHR18_38659	BICF2P480004	38659	27907379	27868.7	2365	NA	NA
S49	DG0003	DG0003	-9	18	BICF2G630695736	BICF2P258864	38688149	43549596	4861.45	544	1	1*
S49	DG0005	DG0005	-9	18	CHR18_38723578	BICF2P429857	38723578	43558373	4834.8	541	1	1
S49	CON	2	00:02:00	18	CHR18_38723578	BICF2P258864	38723578	43549596	4826.02	540	NA	NA
S49	UNION	2	00:02:00	18	BICF2G630695736	BICF2P429857	38688149	43558373	4870.23	545	NA	NA
S50	DG0003	DG0003	-9	19	BICF2P1177994	BICF2P503694	42024137	43781101	1756.96	155	1	1*
S50	DG0005	DG0005	-9	19	BICF2P610570	BICF2P1326887	40983094	46675769	5692.68	503	1	1
S50	CON	2	00:02:00	19	BICF2P1177994	BICF2P503694	42024137	43781101	1756.96	155	NA	NA
S50	UNION	2	00:02:00	19	BICF2P610570	BICF2P1326887	40983094	46675769	5692.68	503	NA	NA
S51	DG0003	DG0003	-9	20	BICF2P604572	BICF2P283137	4149767	5941143	1791.38	173	0	1*
S51	DG0005	DG0005	-9	20	BICF2G630227561	TIGRP2P270070_RS8945714	6889	9752189	9745.3	907	0	2*
S51	CON	2	00:02:00	20	BICF2P604572	BICF2P283137	4149767	5941143	1791.38	173	NA	NA
S51	UNION	2	00:02:00	20	BICF2G630227561	TIGRP2P270070_RS8945714	6889	9752189	9745.3	907	NA	NA
S52	DG0003	DG0003	-9	20	TIGRP2P270105_RS8880738	BICF2S2377625	9953665	12822702	2869.04	239	0	1*
S52	DG0005	DG0005	-9	20	BICF2P149215	BICF2S2332811	10853928	14364370	3510.44	301	0	2*
S52	CON	2	00:02:00	20	BICF2P149215	BICF2S2377625	10853928	12822702	1968.78	167	NA	NA
S52	UNION	2	00:02:00	20	TIGRP2P270105_RS8880738	BICF2S2332811	9953665	14364370	4410.71	373	NA	NA
S53	DG0003	DG0003	-9	20	CHR20_45462481	BICF2P1277815	45462481	48291964	2829.48	372	1	1*
S53	DG0005	DG0005	-9	20	BICF2P705112	BICF2P1277815	44819765	48291964	3472.2	491	1	1
S53	CON	2	00:02:00	20	CHR20_45462481	BICF2P1277815	45462481	48291964	2829.48	372	NA	NA
S53	UNION	2	00:02:00	20	BICF2P705112	BICF2P1277815	44819765	48291964	3472.2	491	NA	NA
S54	DG0003	DG0003	-9	20	BICF2G630448103	BICF2P257221	50464885	51541862	1076.98	165	1	1*
S54	DG0005	DG0005	-9	20	BICF2G630448103	BICF2P257221	50464885	51541862	1076.98	165	1	1
S54	CON	2	00:02:00	20	BICF2G630448103	BICF2P257221	50464885	51541862	1076.98	165	NA	NA
S54	UNION	2	00:02:00	20	BICF2G630448103	BICF2P257221	50464885	51541862	1076.98	165	NA	NA
S55	DG0003	DG0003	-9	22	BICF2P1101030	BICF2P82308	20137878	29245452	9107.58	763	0	1*
S55	DG0005	DG0005	-9	22	CHRUN_JH373295_1257	BICF2P1176633	2390	31096173	31093.8	2571	0	2*
S55	CON	2	00:02:00	22	BICF2P1101030	BICF2P82308	20137878	29245452	9107.58	763	NA	NA
S55	UNION	2	00:02:00	22	CHRUN_JH373295_1257	BICF2P1176633	2390	31096173	31093.8	2571	NA	NA
S56	DG0003	DG0003	-9	22	BICF2P1215505	BICF2G630334679	41775166	47795893	6020.73	524	1	1*
S56	DG0005	DG0005	-9	22	BICF2G630329351	BICF2S23044530	36093770	41961330	5867.56	475	1	1
S56	CON	2	00:02:00	22	BICF2P1215505	BICF2S23044530	41775166	41961330	186.165	14	NA	NA
S56	UNION	2	00:02:00	22	BICF2G630329351	BICF2G630334679	36093770	47795893	11702.1	985	NA	NA
S57	DG0003	DG0003	-9	22	BICF2P1215505	BICF2G630334679	41775166	47795893	6020.73	524	1	1*
S57	DG0005	DG0005	-9	22	BICF2G630334655	CHR22_50894363	47783017	50894363	3111.35	299	1	1
S57	CON	2	00:02:00	22	BICF2G630334655	BICF2G630334679	47783017	47795893	12.877	2	NA	NA
S57	UNION	2	00:02:00	22	BICF2P1215505	CHR22_50894363	41775166	50894363	9119.2	821	NA	NA
S58	DG0003	DG0003	-9	22	BICF2G630336229	BICF2G63089399	54237262	57655345	3418.08	319	1	1*
S58	DG0005	DG0005	-9	22	BICF2G630336229	BICF2S22961802	54237262	56172145	1934.88	181	1	1
S58	CON	2	00:02:00	22	BICF2G630336229	BICF2S22961802	54237262	56172145	1934.88	181	NA	NA
S58	UNION	2	00:02:00	22	BICF2G630336229	BICF2G63089399	54237262	57655345	3418.08	319	NA	NA
S59	DG0003	DG0003	-9	23	BICF2G630378905	CHR23_35679479	23945549	35679479	11733.9	1083	1	1*
S59	DG0005	DG0005	-9	23	BICF2P653617	BICF2P541127	7419	35013324	35005.9	3192	1	1
S59	CON	2	00:02:00	23	BICF2G630378905	BICF2P541127	23945549	35013324	11067.8	1024	NA	NA
S59	UNION	2	00:02:00	23	BICF2P653617	CHR23_35679479	7419	35679479	35672.1	3251	NA	NA
S60	DG0003	DG0003	-9	23	BICF2G630370167	CHR23_50710088	43895654	50710088	6814.44	692	1	1*
S60	DG0005	DG0005	-9	23	BICF2G630366450	CHR23_50710088	47433551	50710088	3276.54	311	1	1
S60	CON	2	00:02:00	23	BICF2G630366450	CHR23_50710088	47433551	50710088	3276.54	311	NA	NA
S60	UNION	2	00:02:00	23	BICF2G630370167	CHR23_50710088	43895654	50710088	6814.44	692	NA	NA
S61	DG0003	DG0003	-9	24	BICF2S23430216	CHR24_25333038	23816844	25333038	1516.19	182	0	1*
S61	DG0005	DG0005	-9	24	BICF2G630514183	BICF2G630500324	5675	27296576	27290.9	2699	0	2*
S61	CON	2	00:02:00	24	BICF2S23430216	CHR24_25333038	23816844	25333038	1516.19	182	NA	NA
S61	UNION	2	00:02:00	24	BICF2G630514183	BICF2G630500324	5675	27296576	27290.9	2699	NA	NA
S62	DG0003	DG0003	-9	26	CHR26_27708711	BICF2S23725453	27708711	36168975	8460.26	894	1	1*
S62	DG0005	DG0005	-9	26	BICF2P264534	TIGRP2P343652_RS8635748	23962112	31402387	7440.28	674	1	1
S62	CON	2	00:02:00	26	CHR26_27708711	TIGRP2P343652_RS8635748	27708711	31402387	3693.68	443	NA	NA
S62	UNION	2	00:02:00	26	BICF2P264534	BICF2S23725453	23962112	36168975	12206.9	1125	NA	NA
S63	DG0003	DG0003	-9	27	BICF2P283147	CHR27_40152975	18514847	40152975	21638.1	2113	0	1*
S63	DG0005	DG0005	-9	27	TIGRP2P350374_RS8534283	BICF2P6091	20130676	27749496	7618.82	693	0	2*
S63	CON	2	00:02:00	27	TIGRP2P350374_RS8534283	BICF2P6091	20130676	27749496	7618.82	693	NA	NA
S63	UNION	2	00:02:00	27	BICF2P283147	CHR27_40152975	18514847	40152975	21638.1	2113	NA	NA
S64	DG0003	DG0003	-9	28	CHRUN_JH373272_234142	BICF2G630259991	13344	38279514	38266.2	3756	1	1*
S64	DG0005	DG0005	-9	28	CHR28_27201623	BICF2P178359	27201623	28961290	1759.67	182	1	1
S64	CON	2	00:02:00	28	CHR28_27201623	BICF2P178359	27201623	28961290	1759.67	182	NA	NA
S64	UNION	2	00:02:00	28	CHRUN_JH373272_234142	BICF2G630259991	13344	38279514	38266.2	3756	NA	NA
S65	DG0003	DG0003	-9	29	BICF2P1433782	BICF2P1283214	40009	7334861	7294.85	612	1	1*
S65	DG0005	DG0005	-9	29	BICF2P1433782	BICF2P1283214	40009	7334861	7294.85	612	1	1
S65	CON	2	00:02:00	29	BICF2P1433782	BICF2P1283214	40009	7334861	7294.85	612	NA	NA
S65	UNION	2	00:02:00	29	BICF2P1433782	BICF2P1283214	40009	7334861	7294.85	612	NA	NA
S66	DG0003	DG0003	-9	29	BICF2S2331310	BICF2G630624891	17759400	23300590	5541.19	484	1	1*
S66	DG0005	DG0005	-9	29	BICF2S2331310	BICF2P804948	17759400	28654144	10894.7	949	1	1
S66	CON	2	00:02:00	29	BICF2S2331310	BICF2G630624891	17759400	23300590	5541.19	484	NA	NA
S66	UNION	2	00:02:00	29	BICF2S2331310	BICF2P804948	17759400	28654144	10894.7	949	NA	NA
S67	DG0003	DG0003	-9	29	BICF2G630626865	BICF2P804948	26028211	28654144	2625.93	228	1	1*
S67	DG0005	DG0005	-9	29	BICF2S2331310	BICF2P804948	17759400	28654144	10894.7	949	1	1
S67	CON	2	00:02:00	29	BICF2G630626865	BICF2P804948	26028211	28654144	2625.93	228	NA	NA
S67	UNION	2	00:02:00	29	BICF2S2331310	BICF2P804948	17759400	28654144	10894.7	949	NA	NA
S68	DG0003	DG0003	-9	29	BICF2G630629628	BICF2G630631525	30338632	32121722	1783.09	183	1	1*
S68	DG0005	DG0005	-9	29	BICF2G630629628	BICF2G630631525	30338632	32121722	1783.09	183	1	1
S68	CON	2	00:02:00	29	BICF2G630629628	BICF2G630631525	30338632	32121722	1783.09	183	NA	NA
S68	UNION	2	00:02:00	29	BICF2G630629628	BICF2G630631525	30338632	32121722	1783.09	183	NA	NA
S69	DG0003	DG0003	-9	30	BICF2G630412497	BICF2P146735	911676	2525196	1613.52	169	1	1*
S69	DG0005	DG0005	-9	30	BICF2P872367	BICF2G630412126	1366	2093592	2092.23	188	1	1
S69	CON	2	00:02:00	30	BICF2G630412497	BICF2G630412126	911676	2093592	1181.92	119	NA	NA
S69	UNION	2	00:02:00	30	BICF2P872367	BICF2P146735	1366	2525196	2523.83	238	NA	NA
S70	DG0003	DG0003	-9	30	BICF2P755470	BICF2P1162331	5661963	7337246	1675.28	118	1	1*
S70	DG0005	DG0005	-9	30	CHR30_5188691	CHR30_6404518	5188691	6404518	1215.83	104	1	1
S70	CON	2	00:02:00	30	BICF2P755470	CHR30_6404518	5661963	6404518	742.556	65	NA	NA
S70	UNION	2	00:02:00	30	CHR30_5188691	BICF2P1162331	5188691	7337246	2148.56	157	NA	NA
S71	DG0003	DG0003	-9	30	BICF2G630401978	BICF2P1278470	25719083	27119758	1400.68	132	1	1*
S71	DG0005	DG0005	-9	30	BICF2G630401978	BICF2P547217	25719083	27136508	1417.43	133	1	1
S71	CON	2	00:02:00	30	BICF2G630401978	BICF2P1278470	25719083	27119758	1400.68	132	NA	NA
S71	UNION	2	00:02:00	30	BICF2G630401978	BICF2P547217	25719083	27136508	1417.43	133	NA	NA
S72	DG0003	DG0003	-9	31	BICF2S2358400	CHR31_28462791	25994824	28462791	2467.97	191	1	1*
S72	DG0005	DG0005	-9	31	BICF2G630737645	BICF2P1011441	24017292	26289113	2271.82	232	1	1
S72	CON	2	00:02:00	31	BICF2S2358400	BICF2P1011441	25994824	26289113	294.29	35	NA	NA
S72	UNION	2	00:02:00	31	BICF2G630737645	CHR31_28462791	24017292	28462791	4445.5	388	NA	NA
S73	DG0003	DG0003	-9	31	BICF2S2358400	CHR31_28462791	25994824	28462791	2467.97	191	1	1*
S73	DG0005	DG0005	-9	31	BICF2P1397606	CHR31_28462791	26353289	28462791	2109.5	151	1	1
S73	CON	2	00:02:00	31	BICF2P1397606	CHR31_28462791	26353289	28462791	2109.5	151	NA	NA
S73	UNION	2	00:02:00	31	BICF2S2358400	CHR31_28462791	25994824	28462791	2467.97	191	NA	NA
S74	DG0003	DG0003	-9	32	BICF2G630601052	BICF2G630589140	4378599	23485679	19107.1	1729	1	1*
S74	DG0005	DG0005	-9	32	BICF2G630601052	BICF2G630589140	4378599	23485679	19107.1	1729	1	1
S74	CON	2	00:02:00	32	BICF2G630601052	BICF2G630589140	4378599	23485679	19107.1	1729	NA	NA
S74	UNION	2	00:02:00	32	BICF2G630601052	BICF2G630589140	4378599	23485679	19107.1	1729	NA	NA
S75	DG0003	DG0003	-9	33	BICF2S23546726	BICF2P465007	11112274	21698642	10586.4	992	1	1*
S75	DG0005	DG0005	-9	33	BICF2P1304902	BICF2P258176	12479768	14498952	2019.18	194	1	1
S75	CON	2	00:02:00	33	BICF2P1304902	BICF2P258176	12479768	14498952	2019.18	194	NA	NA
S75	UNION	2	00:02:00	33	BICF2S23546726	BICF2P465007	11112274	21698642	10586.4	992	NA	NA
S76	DG0003	DG0003	-9	34	BICF2P652180	BICF2P405202	9598406	11934144	2335.74	253	1	1*
S76	DG0005	DG0005	-9	34	BICF2S23317140	TIGRP2P395147_RS9176224	11822219	13602691	1780.47	155	1	1
S76	CON	2	00:02:00	34	BICF2S23317140	BICF2P405202	11822219	11934144	111.926	13	NA	NA
S76	UNION	2	00:02:00	34	BICF2P652180	TIGRP2P395147_RS9176224	9598406	13602691	4004.29	395	NA	NA
S77	DG0003	DG0003	-9	34	BICF2P590440	BICF2P319219	37323213	39320622	1997.41	176	1	1*
S77	DG0005	DG0005	-9	34	BICF2G630449375	BICF2P932375	38153239	39907912	1754.67	152	1	1
S77	CON	2	00:02:00	34	BICF2G630449375	BICF2P319219	38153239	39320622	1167.38	100	NA	NA
S77	UNION	2	00:02:00	34	BICF2P590440	BICF2P932375	37323213	39907912	2584.7	228	NA	NA
S78	DG0003	DG0003	-9	36	BICF2S23228379	BICF2S23240820	23164539	24289548	1125.01	100	1	1*
S78	DG0005	DG0005	-9	36	BICF2P1136860	BICF2G630757031	22627008	27366856	4739.85	461	1	1
S78	CON	2	00:02:00	36	BICF2S23228379	BICF2S23240820	23164539	24289548	1125.01	100	NA	NA
S78	UNION	2	00:02:00	36	BICF2P1136860	BICF2G630757031	22627008	27366856	4739.85	461	NA	NA

## Sheet: linked regions
Table S1. Raw Merlin output for linkage analysis.
CHR	POS	LABEL	MODEL	LOD	ALPHA	HLOD
1	0.0017	0.17	Dwarfism_recessiv	0.4454	1	0.4454
1	0.0021	0.213	Dwarfism_recessiv	0.4419	1	0.4419
1	0.0025	0.251	Dwarfism_recessiv	0.4386	1	0.4386
1	0.0027	0.273	Dwarfism_recessiv	0.4367	1	0.4367
1	0.0035	0.348	Dwarfism_recessiv	0.4303	1	0.4303
1	0.0036	0.364	Dwarfism_recessiv	0.429	1	0.429
1	0.0041	0.413	Dwarfism_recessiv	0.4247	1	0.4247
1	0.0042	0.42	Dwarfism_recessiv	0.4241	1	0.4241
1	0.0051	0.511	Dwarfism_recessiv	0.416	1	0.416
1	0.0054	0.536	Dwarfism_recessiv	0.4139	1	0.4139
1	0.0057	0.574	Dwarfism_recessiv	0.4105	1	0.4105
1	0.006	0.603	Dwarfism_recessiv	0.4078	1	0.4078
1	0.0064	0.64	Dwarfism_recessiv	0.4044	1	0.4044
1	0.0065	0.65	Dwarfism_recessiv	0.4035	1	0.4035
1	0.0068	0.676	Dwarfism_recessiv	0.4012	1	0.4012
1	0.0069	0.692	Dwarfism_recessiv	0.3996	1	0.3996
1	0.007	0.7	Dwarfism_recessiv	0.3989	1	0.3989
1	0.0071	0.714	Dwarfism_recessiv	0.3976	1	0.3976
1	0.0072	0.718	Dwarfism_recessiv	0.3972	1	0.3972
1	0.0075	0.753	Dwarfism_recessiv	0.3939	1	0.3939
1	0.0079	0.79	Dwarfism_recessiv	0.3905	1	0.3905
1	0.008	0.802	Dwarfism_recessiv	0.3893	1	0.3893
1	0.0082	0.823	Dwarfism_recessiv	0.3874	1	0.3874
1	0.0084	0.841	Dwarfism_recessiv	0.3857	1	0.3857
1	0.0087	0.874	Dwarfism_recessiv	0.3825	1	0.3825
1	0.0089	0.889	Dwarfism_recessiv	0.381	1	0.381
1	0.009	0.897	Dwarfism_recessiv	0.3803	1	0.3803
1	0.0091	0.912	Dwarfism_recessiv	0.3788	1	0.3788
1	0.0092	0.921	Dwarfism_recessiv	0.3779	1	0.3779
1	0.0096	0.963	Dwarfism_recessiv	0.3738	1	0.3738
1	0.0097	0.968	Dwarfism_recessiv	0.3733	1	0.3733
1	0.0098	0.977	Dwarfism_recessiv	0.3725	1	0.3725
1	0.0106	1.063	Dwarfism_recessiv	0.364	1	0.364
1	0.0111	1.113	Dwarfism_recessiv	0.3589	1	0.3589
1	0.0112	1.121	Dwarfism_recessiv	0.3581	1	0.3581
1	0.0115	1.148	Dwarfism_recessiv	0.3553	1	0.3553
1	0.0116	1.165	Dwarfism_recessiv	0.3536	1	0.3536
1	0.0118	1.178	Dwarfism_recessiv	0.3522	1	0.3522
1	0.0123	1.234	Dwarfism_recessiv	0.3465	1	0.3465
1	0.0131	1.312	Dwarfism_recessiv	0.3382	1	0.3382
1	0.0132	1.317	Dwarfism_recessiv	0.3377	1	0.3377
1	0.0133	1.326	Dwarfism_recessiv	0.3367	1	0.3367
1	0.0138	1.385	Dwarfism_recessiv	0.3304	1	0.3304
1	0.014	1.4	Dwarfism_recessiv	0.3287	1	0.3287
1	0.014	1.404	Dwarfism_recessiv	0.3283	1	0.3283
1	0.0141	1.412	Dwarfism_recessiv	0.3275	1	0.3275
1	0.0141	1.414	Dwarfism_recessiv	0.3273	1	0.3273
1	0.0143	1.43	Dwarfism_recessiv	0.3255	1	0.3255
1	0.0146	1.461	Dwarfism_recessiv	0.3222	1	0.3222
1	0.0147	1.473	Dwarfism_recessiv	0.3208	1	0.3208
1	0.0149	1.487	Dwarfism_recessiv	0.3192	1	0.3192
1	0.015	1.499	Dwarfism_recessiv	0.3179	1	0.3179
1	0.0151	1.509	Dwarfism_recessiv	0.3167	1	0.3167
1	0.0153	1.532	Dwarfism_recessiv	0.3143	1	0.3143
1	0.0154	1.545	Dwarfism_recessiv	0.3128	1	0.3128
1	0.0156	1.562	Dwarfism_recessiv	0.3108	1	0.3108
1	0.0158	1.578	Dwarfism_recessiv	0.309	1	0.309
1	0.0158	1.583	Dwarfism_recessiv	0.3084	1	0.3084
1	0.0159	1.595	Dwarfism_recessiv	0.3071	1	0.3071
1	0.0161	1.609	Dwarfism_recessiv	0.3055	1	0.3055
1	0.0163	1.633	Dwarfism_recessiv	0.3027	1	0.3027
1	0.0164	1.643	Dwarfism_recessiv	0.3015	1	0.3015
1	0.0168	1.679	Dwarfism_recessiv	0.2974	1	0.2974
1	0.017	1.701	Dwarfism_recessiv	0.2949	1	0.2949
1	0.0172	1.722	Dwarfism_recessiv	0.2923	1	0.2923
1	0.0173	1.728	Dwarfism_recessiv	0.2916	1	0.2916
1	0.0174	1.737	Dwarfism_recessiv	0.2906	1	0.2906
1	0.0175	1.752	Dwarfism_recessiv	0.2887	1	0.2887
1	0.0179	1.787	Dwarfism_recessiv	0.2846	1	0.2846
1	0.019	1.896	Dwarfism_recessiv	0.2713	1	0.2713
1	0.0192	1.917	Dwarfism_recessiv	0.2687	1	0.2687
1	0.0193	1.927	Dwarfism_recessiv	0.2674	1	0.2674
1	0.0194	1.936	Dwarfism_recessiv	0.2663	1	0.2663
1	0.0197	1.968	Dwarfism_recessiv	0.2622	1	0.2622
1	0.0202	2.016	Dwarfism_recessiv	0.2562	1	0.2562
1	0.0208	2.08	Dwarfism_recessiv	0.2479	1	0.2479
1	0.0216	2.164	Dwarfism_recessiv	0.2367	1	0.2367
1	0.0223	2.229	Dwarfism_recessiv	0.228	1	0.228
1	0.0229	2.289	Dwarfism_recessiv	0.2196	1	0.2196
1	0.0232	2.322	Dwarfism_recessiv	0.2151	1	0.2151
1	0.0233	2.335	Dwarfism_recessiv	0.2132	1	0.2132
1	0.0239	2.392	Dwarfism_recessiv	0.2051	1	0.2051
1	0.0241	2.407	Dwarfism_recessiv	0.2029	1	0.2029
1	0.0241	2.414	Dwarfism_recessiv	0.2019	1	0.2019
1	0.0243	2.427	Dwarfism_recessiv	0.2	1	0.2
1	0.0244	2.439	Dwarfism_recessiv	0.1983	1	0.1983
1	0.0246	2.459	Dwarfism_recessiv	0.1953	1	0.1953
1	0.0248	2.485	Dwarfism_recessiv	0.1915	1	0.1915
1	0.025	2.501	Dwarfism_recessiv	0.189	1	0.189
1	0.0251	2.508	Dwarfism_recessiv	0.188	1	0.188
1	0.0252	2.524	Dwarfism_recessiv	0.1856	1	0.1856
1	0.0258	2.58	Dwarfism_recessiv	0.1771	1	0.1771
1	0.0261	2.609	Dwarfism_recessiv	0.1725	1	0.1725
1	0.0262	2.615	Dwarfism_recessiv	0.1716	1	0.1716
1	0.0264	2.635	Dwarfism_recessiv	0.1685	1	0.1685
1	0.0267	2.673	Dwarfism_recessiv	0.1625	1	0.1625
1	0.0269	2.693	Dwarfism_recessiv	0.1594	1	0.1594
1	0.0279	2.794	Dwarfism_recessiv	0.1428	1	0.1428
1	0.0282	2.815	Dwarfism_recessiv	0.1393	1	0.1393
1	0.0285	2.852	Dwarfism_recessiv	0.133	1	0.133
1	0.029	2.898	Dwarfism_recessiv	0.1252	1	0.1252
1	0.0293	2.932	Dwarfism_recessiv	0.1193	1	0.1193
1	0.0309	3.092	Dwarfism_recessiv	0.0901	1	0.0901
1	0.0313	3.127	Dwarfism_recessiv	0.0835	1	0.0835
1	0.0313	3.129	Dwarfism_recessiv	0.0831	1	0.0831
1	0.0317	3.166	Dwarfism_recessiv	0.076	1	0.076
1	0.0319	3.194	Dwarfism_recessiv	0.0705	1	0.0705
1	0.032	3.2	Dwarfism_recessiv	0.0693	1	0.0693
1	0.0327	3.274	Dwarfism_recessiv	0.0545	1	0.0545
1	0.0337	3.375	Dwarfism_recessiv	0.0335	1	0.0335
1	0.0342	3.42	Dwarfism_recessiv	0.0238	1	0.0238
1	0.0346	3.458	Dwarfism_recessiv	0.0152	1	0.0152
1	0.0348	3.481	Dwarfism_recessiv	0.0102	1	0.0102
1	0.0348	3.484	Dwarfism_recessiv	0.0093	1	0.0093
1	0.0352	3.52	Dwarfism_recessiv	0.0011	1	0.0011
1	0.036	3.598	Dwarfism_recessiv	-0.0172	0	0
1	0.0364	3.64	Dwarfism_recessiv	-0.0274	0	0
1	0.037	3.697	Dwarfism_recessiv	-0.0417	0	0
1	0.0376	3.761	Dwarfism_recessiv	-0.0582	0	0
1	0.038	3.797	Dwarfism_recessiv	-0.0679	0	0
1	0.0383	3.828	Dwarfism_recessiv	-0.0764	0	0
1	0.0388	3.875	Dwarfism_recessiv	-0.0897	0	0
1	0.0389	3.89	Dwarfism_recessiv	-0.0939	0	0
1	0.0395	3.947	Dwarfism_recessiv	-0.1105	0	0
1	0.0396	3.963	Dwarfism_recessiv	-0.1153	0	0
1	0.0396	3.965	Dwarfism_recessiv	-0.1159	0	0
1	0.0397	3.967	Dwarfism_recessiv	-0.1167	0	0
1	0.0399	3.989	Dwarfism_recessiv	-0.1233	0	0
1	0.0399	3.99	Dwarfism_recessiv	-0.1237	0	0
1	0.0401	4.01	Dwarfism_recessiv	-0.1299	0	0
1	0.0402	4.021	Dwarfism_recessiv	-0.1334	0	0
1	0.0404	4.045	Dwarfism_recessiv	-0.1408	0	0
1	0.0405	4.051	Dwarfism_recessiv	-0.1429	0	0
1	0.0406	4.062	Dwarfism_recessiv	-0.1462	0	0
1	0.0409	4.09	Dwarfism_recessiv	-0.1557	0	0
1	0.041	4.1	Dwarfism_recessiv	-0.1587	0	0
1	0.0412	4.121	Dwarfism_recessiv	-0.1659	0	0
1	0.0413	4.134	Dwarfism_recessiv	-0.1705	0	0
1	0.0414	4.142	Dwarfism_recessiv	-0.1731	0	0
1	0.0416	4.157	Dwarfism_recessiv	-0.1784	0	0
1	0.0417	4.172	Dwarfism_recessiv	-0.1838	0	0
1	0.042	4.204	Dwarfism_recessiv	-0.1952	0	0
1	0.0421	4.211	Dwarfism_recessiv	-0.1975	0	0
1	0.0423	4.227	Dwarfism_recessiv	-0.2036	0	0
1	0.0423	4.228	Dwarfism_recessiv	-0.2038	0	0
1	0.0424	4.239	Dwarfism_recessiv	-0.2082	0	0
1	0.0425	4.245	Dwarfism_recessiv	-0.2104	0	0
1	0.0427	4.272	Dwarfism_recessiv	-0.2206	0	0
1	0.0428	4.284	Dwarfism_recessiv	-0.225	0	0
1	0.0436	4.361	Dwarfism_recessiv	-0.2564	0	0
1	0.0437	4.372	Dwarfism_recessiv	-0.2606	0	0
1	0.0439	4.39	Dwarfism_recessiv	-0.2686	0	0
1	0.044	4.402	Dwarfism_recessiv	-0.2735	0	0
1	0.0441	4.411	Dwarfism_recessiv	-0.2775	0	0
1	0.0456	4.56	Dwarfism_recessiv	-0.3487	0	0
1	0.0482	4.821	Dwarfism_recessiv	-0.5102	0	0
1	0.0491	4.912	Dwarfism_recessiv	-0.5849	0	0
1	0.0493	4.931	Dwarfism_recessiv	-0.6024	0	0
1	0.0494	4.942	Dwarfism_recessiv	-0.6129	0	0
1	0.0495	4.952	Dwarfism_recessiv	-0.6221	0	0
1	0.0497	4.975	Dwarfism_recessiv	-0.6451	0	0
1	0.0499	4.985	Dwarfism_recessiv	-0.6558	0	0
1	0.0499	4.986	Dwarfism_recessiv	-0.6563	0	0
1	0.0501	5.006	Dwarfism_recessiv	-0.6783	0	0
1	0.0501	5.014	Dwarfism_recessiv	-0.687	0	0
1	0.0502	5.016	Dwarfism_recessiv	-0.6896	0	0
1	0.0503	5.027	Dwarfism_recessiv	-0.7018	0	0
1	0.0503	5.029	Dwarfism_recessiv	-0.7045	0	0
1	0.0503	5.03	Dwarfism_recessiv	-0.706	0	0
1	0.0503	5.033	Dwarfism_recessiv	-0.709	0	0
1	0.0504	5.044	Dwarfism_recessiv	-0.7226	0	0
1	0.0506	5.059	Dwarfism_recessiv	-0.7415	0	0
1	0.0507	5.067	Dwarfism_recessiv	-0.7511	0	0
1	0.0507	5.074	Dwarfism_recessiv	-0.7607	0	0
1	0.0509	5.092	Dwarfism_recessiv	-0.7857	0	0
1	0.0509	5.095	Dwarfism_recessiv	-0.7895	0	0
1	0.0511	5.11	Dwarfism_recessiv	-0.8116	0	0
1	0.0512	5.123	Dwarfism_recessiv	-0.8315	0	0
1	0.0513	5.129	Dwarfism_recessiv	-0.8413	0	0
1	0.0516	5.157	Dwarfism_recessiv	-0.8888	0	0
1	0.0516	5.16	Dwarfism_recessiv	-0.8946	0	0
1	0.052	5.197	Dwarfism_recessiv	-0.9677	0	0
1	0.052	5.199	Dwarfism_recessiv	-0.9721	0	0
1	0.0521	5.211	Dwarfism_recessiv	-0.9997	0	0
1	0.0524	5.244	Dwarfism_recessiv	-1.085	0	0
1	0.0529	5.288	Dwarfism_recessiv	-1.2299	0	0
1	0.0529	5.288	Dwarfism_recessiv	-1.2305	0	0
1	0.0531	5.31	Dwarfism_recessiv	-1.3275	0	0
1	0.0532	5.323	Dwarfism_recessiv	-1.399	0	0
1	0.0533	5.325	Dwarfism_recessiv	-1.4101	0	0
1	0.0534	5.345	Dwarfism_recessiv	-1.5464	0	0
1	0.0536	5.362	Dwarfism_recessiv	-1.7106	0	0
1	0.0539	5.395	Dwarfism_recessiv	-2.7883	0	0
1	0.0541	5.41	Dwarfism_recessiv	-2.7883	0	0
1	0.0542	5.421	Dwarfism_recessiv	-2.7883	0	0
1	0.0542	5.421	Dwarfism_recessiv	-2.7883	0	0
1	0.0543	5.432	Dwarfism_recessiv	-2.7883	0	0
1	0.0544	5.441	Dwarfism_recessiv	-2.7883	0	0
1	0.0545	5.453	Dwarfism_recessiv	-2.7883	0	0
1	0.0547	5.472	Dwarfism_recessiv	-2.7883	0	0
1	0.0548	5.477	Dwarfism_recessiv	-2.7883	0	0
1	0.055	5.498	Dwarfism_recessiv	-2.7883	0	0
1	0.0551	5.512	Dwarfism_recessiv	-2.7883	0	0
1	0.0552	5.523	Dwarfism_recessiv	-2.7883	0	0
1	0.0555	5.548	Dwarfism_recessiv	-2.7883	0	0
1	0.0556	5.562	Dwarfism_recessiv	-2.7883	0	0
1	0.0557	5.568	Dwarfism_recessiv	-2.7883	0	0
1	0.0558	5.579	Dwarfism_recessiv	-2.7883	0	0
1	0.0559	5.59	Dwarfism_recessiv	-2.7883	0	0
1	0.056	5.601	Dwarfism_recessiv	-2.7881	0	0
1	0.0562	5.62	Dwarfism_recessiv	-2.7877	0	0
1	0.0562	5.625	Dwarfism_recessiv	-2.7876	0	0
1	0.0565	5.648	Dwarfism_recessiv	-2.7874	0	0
1	0.0569	5.694	Dwarfism_recessiv	-2.7874	0	0
1	0.0571	5.708	Dwarfism_recessiv	-2.7876	0	0
1	0.0575	5.749	Dwarfism_recessiv	-2.7883	0	0
1	0.0578	5.78	Dwarfism_recessiv	-2.7883	0	0
1	0.0579	5.786	Dwarfism_recessiv	-2.7883	0	0
1	0.058	5.796	Dwarfism_recessiv	-2.7883	0	0
1	0.0581	5.808	Dwarfism_recessiv	-2.7883	0	0
1	0.0582	5.819	Dwarfism_recessiv	-2.7883	0	0
1	0.0584	5.837	Dwarfism_recessiv	-2.7883	0	0
1	0.0584	5.845	Dwarfism_recessiv	-2.7883	0	0
1	0.0586	5.86	Dwarfism_recessiv	-2.7883	0	0
1	0.0587	5.873	Dwarfism_recessiv	-2.7882	0	0
1	0.0594	5.94	Dwarfism_recessiv	-2.7883	0	0
1	0.0595	5.946	Dwarfism_recessiv	-2.7883	0	0
1	0.0596	5.962	Dwarfism_recessiv	-2.7883	0	0
1	0.0597	5.97	Dwarfism_recessiv	-2.7883	0	0
1	0.06	6.003	Dwarfism_recessiv	-2.7883	0	0
1	0.0602	6.021	Dwarfism_recessiv	-2.7883	0	0
1	0.0603	6.028	Dwarfism_recessiv	-2.7883	0	0
1	0.0604	6.041	Dwarfism_recessiv	-2.7883	0	0
1	0.0605	6.052	Dwarfism_recessiv	-2.7883	0	0
1	0.061	6.096	Dwarfism_recessiv	-2.7883	0	0
1	0.0611	6.108	Dwarfism_recessiv	-2.7883	0	0
1	0.0614	6.14	Dwarfism_recessiv	-2.788	0	0
1	0.0616	6.162	Dwarfism_recessiv	-2.7879	0	0
1	0.0621	6.209	Dwarfism_recessiv	-2.7883	0	0
1	0.0622	6.219	Dwarfism_recessiv	-2.7883	0	0
1	0.0622	6.225	Dwarfism_recessiv	-2.7883	0	0
1	0.0626	6.264	Dwarfism_recessiv	-2.7882	0	0
1	0.0628	6.283	Dwarfism_recessiv	-2.7883	0	0
1	0.063	6.297	Dwarfism_recessiv	-2.7883	0	0
1	0.063	6.305	Dwarfism_recessiv	-2.7883	0	0
1	0.0632	6.315	Dwarfism_recessiv	-2.7883	0	0
1	0.0632	6.325	Dwarfism_recessiv	-2.7883	0	0
1	0.0635	6.353	Dwarfism_recessiv	-2.7883	0	0
1	0.0636	6.359	Dwarfism_recessiv	-2.7883	0	0
1	0.0637	6.37	Dwarfism_recessiv	-2.7883	0	0
1	0.0638	6.379	Dwarfism_recessiv	-2.7883	0	0
1	0.0641	6.405	Dwarfism_recessiv	-2.7882	0	0
1	0.0643	6.427	Dwarfism_recessiv	-2.7883	0	0
1	0.0645	6.447	Dwarfism_recessiv	-2.7883	0	0
1	0.0645	6.454	Dwarfism_recessiv	-2.7883	0	0
1	0.0647	6.466	Dwarfism_recessiv	-2.7883	0	0
1	0.0647	6.474	Dwarfism_recessiv	-2.7883	0	0
1	0.0649	6.49	Dwarfism_recessiv	-2.7883	0	0
1	0.065	6.496	Dwarfism_recessiv	-2.7883	0	0
1	0.0651	6.512	Dwarfism_recessiv	-2.7883	0	0
1	0.0652	6.52	Dwarfism_recessiv	-2.7883	0	0
1	0.0654	6.539	Dwarfism_recessiv	-2.7883	0	0
1	0.0655	6.551	Dwarfism_recessiv	-2.7883	0	0
1	0.0655	6.554	Dwarfism_recessiv	-2.7883	0	0
1	0.0657	6.568	Dwarfism_recessiv	-2.7883	0	0
1	0.0658	6.581	Dwarfism_recessiv	-2.7883	0	0
1	0.0659	6.595	Dwarfism_recessiv	-2.7883	0	0
1	0.0661	6.614	Dwarfism_recessiv	-2.7883	0	0
1	0.0663	6.628	Dwarfism_recessiv	-2.7883	0	0
1	0.0664	6.636	Dwarfism_recessiv	-2.7883	0	0
1	0.0668	6.675	Dwarfism_recessiv	-2.7883	0	0
1	0.0668	6.685	Dwarfism_recessiv	-2.7882	0	0
1	0.0669	6.693	Dwarfism_recessiv	-2.7882	0	0
1	0.0671	6.711	Dwarfism_recessiv	-2.7882	0	0
1	0.0672	6.722	Dwarfism_recessiv	-2.7882	0	0
1	0.0674	6.736	Dwarfism_recessiv	-2.7883	0	0
1	0.0674	6.737	Dwarfism_recessiv	-2.7883	0	0
1	0.0679	6.788	Dwarfism_recessiv	-2.788	0	0
1	0.068	6.797	Dwarfism_recessiv	-2.7881	0	0
1	0.0683	6.826	Dwarfism_recessiv	-2.7883	0	0
1	0.0684	6.844	Dwarfism_recessiv	-2.7883	0	0
1	0.0684	6.845	Dwarfism_recessiv	-2.7883	0	0
1	0.0686	6.856	Dwarfism_recessiv	-2.7883	0	0
1	0.0687	6.865	Dwarfism_recessiv	-2.7883	0	0
1	0.0688	6.879	Dwarfism_recessiv	-2.7883	0	0
1	0.0689	6.892	Dwarfism_recessiv	-2.7883	0	0
1	0.0691	6.913	Dwarfism_recessiv	-2.7878	0	0
1	0.0696	6.964	Dwarfism_recessiv	-2.7871	0	0
1	0.0702	7.02	Dwarfism_recessiv	-2.7872	0	0
1	0.0704	7.038	Dwarfism_recessiv	-2.7875	0	0
1	0.0705	7.05	Dwarfism_recessiv	-2.7877	0	0
1	0.0708	7.075	Dwarfism_recessiv	-2.7883	0	0
1	0.0709	7.086	Dwarfism_recessiv	-2.7883	0	0
1	0.0711	7.107	Dwarfism_recessiv	-2.7883	0	0
1	0.0712	7.124	Dwarfism_recessiv	-2.7883	0	0
1	0.0714	7.143	Dwarfism_recessiv	-2.7883	0	0
1	0.0718	7.176	Dwarfism_recessiv	-2.7883	0	0
1	0.0718	7.183	Dwarfism_recessiv	-2.7883	0	0
1	0.072	7.201	Dwarfism_recessiv	-2.7883	0	0
1	0.0723	7.23	Dwarfism_recessiv	-2.7883	0	0
1	0.0724	7.24	Dwarfism_recessiv	-2.7883	0	0
1	0.0726	7.255	Dwarfism_recessiv	-2.7883	0	0
1	0.0726	7.259	Dwarfism_recessiv	-2.7883	0	0
1	0.0728	7.281	Dwarfism_recessiv	-2.7883	0	0
1	0.0729	7.287	Dwarfism_recessiv	-2.7883	0	0
1	0.0732	7.317	Dwarfism_recessiv	-2.7883	0	0
1	0.0734	7.338	Dwarfism_recessiv	-2.7883	0	0
1	0.0735	7.349	Dwarfism_recessiv	-2.7883	0	0
1	0.0736	7.358	Dwarfism_recessiv	-2.7883	0	0
1	0.0749	7.493	Dwarfism_recessiv	-2.787	0	0
1	0.0751	7.513	Dwarfism_recessiv	-2.7873	0	0
1	0.0752	7.52	Dwarfism_recessiv	-2.7875	0	0
1	0.0755	7.552	Dwarfism_recessiv	-2.7882	0	0
1	0.0755	7.554	Dwarfism_recessiv	-2.7883	0	0
1	0.0757	7.571	Dwarfism_recessiv	-2.7883	0	0
1	0.0758	7.579	Dwarfism_recessiv	-2.7883	0	0
1	0.0762	7.618	Dwarfism_recessiv	-2.7876	0	0
1	0.0764	7.635	Dwarfism_recessiv	-2.7874	0	0
1	0.0766	7.658	Dwarfism_recessiv	-2.7873	0	0
1	0.0771	7.707	Dwarfism_recessiv	-2.7877	0	0
1	0.0772	7.721	Dwarfism_recessiv	-2.7879	0	0
1	0.0773	7.729	Dwarfism_recessiv	-2.7881	0	0
1	0.0774	7.74	Dwarfism_recessiv	-2.7883	0	0
1	0.0777	7.769	Dwarfism_recessiv	-2.788	0	0
1	0.0779	7.786	Dwarfism_recessiv	-2.7879	0	0
1	0.0781	7.814	Dwarfism_recessiv	-2.788	0	0
1	0.0782	7.821	Dwarfism_recessiv	-2.7881	0	0
1	0.0783	7.832	Dwarfism_recessiv	-2.7882	0	0
1	0.0784	7.839	Dwarfism_recessiv	-2.7883	0	0
1	0.0784	7.845	Dwarfism_recessiv	-2.7882	0	0
1	0.0786	7.864	Dwarfism_recessiv	-2.7881	0	0
1	0.0787	7.865	Dwarfism_recessiv	-2.7881	0	0
1	0.0789	7.89	Dwarfism_recessiv	-2.7881	0	0
1	0.079	7.899	Dwarfism_recessiv	-2.7882	0	0
1	0.0791	7.91	Dwarfism_recessiv	-2.7883	0	0
1	0.0792	7.916	Dwarfism_recessiv	-2.7883	0	0
1	0.0793	7.925	Dwarfism_recessiv	-2.7883	0	0
1	0.0793	7.926	Dwarfism_recessiv	-2.7883	0	0
1	0.0794	7.935	Dwarfism_recessiv	-2.7883	0	0
1	0.0795	7.948	Dwarfism_recessiv	-2.7883	0	0
1	0.0796	7.961	Dwarfism_recessiv	-2.7883	0	0
1	0.0796	7.961	Dwarfism_recessiv	-2.7883	0	0
1	0.0798	7.98	Dwarfism_recessiv	-2.7883	0	0
1	0.08	8.002	Dwarfism_recessiv	-2.7883	0	0
1	0.0802	8.023	Dwarfism_recessiv	-2.7883	0	0
1	0.0803	8.033	Dwarfism_recessiv	-2.7883	0	0
1	0.0804	8.044	Dwarfism_recessiv	-2.7883	0	0
1	0.0805	8.048	Dwarfism_recessiv	-2.7883	0	0
1	0.0805	8.054	Dwarfism_recessiv	-2.7883	0	0
1	0.0807	8.073	Dwarfism_recessiv	-2.7875	0	0
1	0.0812	8.118	Dwarfism_recessiv	-2.7861	0	0
1	0.0813	8.131	Dwarfism_recessiv	-2.7858	0	0
1	0.0816	8.162	Dwarfism_recessiv	-2.7854	0	0
1	0.0817	8.165	Dwarfism_recessiv	-2.7854	0	0
1	0.0821	8.207	Dwarfism_recessiv	-2.7853	0	0
1	0.0823	8.23	Dwarfism_recessiv	-2.7855	0	0
1	0.0824	8.236	Dwarfism_recessiv	-2.7855	0	0
1	0.0825	8.253	Dwarfism_recessiv	-2.7858	0	0
1	0.0827	8.269	Dwarfism_recessiv	-2.7861	0	0
1	0.0828	8.28	Dwarfism_recessiv	-2.7864	0	0
1	0.0829	8.291	Dwarfism_recessiv	-2.7867	0	0
1	0.0833	8.329	Dwarfism_recessiv	-2.788	0	0
1	0.0834	8.337	Dwarfism_recessiv	-2.7883	0	0
1	0.0835	8.353	Dwarfism_recessiv	-2.789	0	0
1	0.0837	8.37	Dwarfism_recessiv	-2.7898	0	0
1	0.0837	8.371	Dwarfism_recessiv	-2.7899	0	0
1	0.0837	8.375	Dwarfism_recessiv	-2.7901	0	0
1	0.0839	8.39	Dwarfism_recessiv	-2.7909	0	0
1	0.0839	8.394	Dwarfism_recessiv	-2.7912	0	0
1	0.0841	8.411	Dwarfism_recessiv	-2.7922	0	0
1	0.0843	8.43	Dwarfism_recessiv	-2.7934	0	0
1	0.0844	8.443	Dwarfism_recessiv	-2.7943	0	0
1	0.0846	8.455	Dwarfism_recessiv	-2.7951	0	0
1	0.0846	8.464	Dwarfism_recessiv	-2.7957	0	0
1	0.0848	8.477	Dwarfism_recessiv	-2.7968	0	0
1	0.0849	8.486	Dwarfism_recessiv	-2.7969	0	0
1	0.085	8.498	Dwarfism_recessiv	-2.7972	0	0
1	0.0851	8.515	Dwarfism_recessiv	-2.7975	0	0
1	0.0855	8.547	Dwarfism_recessiv	-2.7981	0	0
1	0.0856	8.562	Dwarfism_recessiv	-2.7984	0	0
1	0.0857	8.573	Dwarfism_recessiv	-2.7987	0	0
1	0.086	8.595	Dwarfism_recessiv	-2.7992	0	0
1	0.086	8.604	Dwarfism_recessiv	-2.7993	0	0
1	0.0861	8.614	Dwarfism_recessiv	-2.7995	0	0
1	0.0863	8.63	Dwarfism_recessiv	-2.7999	0	0
1	0.0865	8.647	Dwarfism_recessiv	-2.8002	0	0
1	0.0865	8.648	Dwarfism_recessiv	-2.8002	0	0
1	0.0868	8.68	Dwarfism_recessiv	-2.8009	0	0
1	0.0871	8.712	Dwarfism_recessiv	-2.8015	0	0
1	0.0872	8.718	Dwarfism_recessiv	-2.8016	0	0
1	0.0873	8.729	Dwarfism_recessiv	-2.8018	0	0
1	0.0875	8.746	Dwarfism_recessiv	-2.8022	0	0
1	0.0875	8.752	Dwarfism_recessiv	-2.8023	0	0
1	0.0876	8.763	Dwarfism_recessiv	-2.8025	0	0
1	0.0878	8.775	Dwarfism_recessiv	-2.8027	0	0
1	0.0879	8.785	Dwarfism_recessiv	-2.8029	0	0
1	0.088	8.799	Dwarfism_recessiv	-2.8032	0	0
1	0.0882	8.817	Dwarfism_recessiv	-2.8037	0	0
1	0.0887	8.871	Dwarfism_recessiv	-2.8047	0	0
1	0.0888	8.878	Dwarfism_recessiv	-2.8049	0	0
1	0.0889	8.889	Dwarfism_recessiv	-2.8051	0	0
1	0.089	8.9	Dwarfism_recessiv	-2.8053	0	0
1	0.089	8.903	Dwarfism_recessiv	-2.8053	0	0
1	0.0892	8.921	Dwarfism_recessiv	-2.8056	0	0
1	0.0893	8.926	Dwarfism_recessiv	-2.8057	0	0
1	0.0893	8.927	Dwarfism_recessiv	-2.8057	0	0
1	0.0893	8.935	Dwarfism_recessiv	-2.8059	0	0
1	0.0896	8.955	Dwarfism_recessiv	-2.8064	0	0
1	0.0898	8.975	Dwarfism_recessiv	-2.8069	0	0
1	0.0898	8.981	Dwarfism_recessiv	-2.807	0	0
1	0.0899	8.994	Dwarfism_recessiv	-2.8073	0	0
1	0.0901	9.011	Dwarfism_recessiv	-2.8076	0	0
1	0.0902	9.018	Dwarfism_recessiv	-2.8078	0	0
1	0.0903	9.034	Dwarfism_recessiv	-2.8081	0	0
1	0.0904	9.041	Dwarfism_recessiv	-2.8083	0	0
1	0.0907	9.066	Dwarfism_recessiv	-2.8088	0	0
1	0.0908	9.075	Dwarfism_recessiv	-2.809	0	0
1	0.0909	9.094	Dwarfism_recessiv	-2.8094	0	0
1	0.091	9.096	Dwarfism_recessiv	-2.8094	0	0
1	0.0912	9.121	Dwarfism_recessiv	-2.8099	0	0
1	0.0913	9.134	Dwarfism_recessiv	-2.8102	0	0
1	0.0917	9.166	Dwarfism_recessiv	-2.8109	0	0
1	0.0919	9.187	Dwarfism_recessiv	-2.8113	0	0
1	0.092	9.201	Dwarfism_recessiv	-2.8116	0	0
1	0.092	9.203	Dwarfism_recessiv	-2.8117	0	0
1	0.092	9.203	Dwarfism_recessiv	-2.8117	0	0
1	0.092	9.204	Dwarfism_recessiv	-2.8117	0	0
1	0.0921	9.214	Dwarfism_recessiv	-2.8119	0	0
1	0.0926	9.257	Dwarfism_recessiv	-2.8126	0	0
1	0.0927	9.274	Dwarfism_recessiv	-2.813	0	0
1	0.0929	9.289	Dwarfism_recessiv	-2.8135	0	0
1	0.093	9.296	Dwarfism_recessiv	-2.8136	0	0
1	0.0931	9.309	Dwarfism_recessiv	-2.8139	0	0
1	0.0933	9.326	Dwarfism_recessiv	-2.8142	0	0
1	0.0934	9.338	Dwarfism_recessiv	-2.8145	0	0
1	0.0935	9.354	Dwarfism_recessiv	-2.8147	0	0
1	0.0936	9.362	Dwarfism_recessiv	-2.8148	0	0
1	0.0938	9.377	Dwarfism_recessiv	-2.815	0	0
1	0.094	9.396	Dwarfism_recessiv	-2.8153	0	0
1	0.0941	9.407	Dwarfism_recessiv	-2.8156	0	0
1	0.0942	9.42	Dwarfism_recessiv	-2.8159	0	0
1	0.0943	9.429	Dwarfism_recessiv	-2.8161	0	0
1	0.0944	9.44	Dwarfism_recessiv	-2.8164	0	0
1	0.0946	9.46	Dwarfism_recessiv	-2.817	0	0
1	0.0946	9.464	Dwarfism_recessiv	-2.8171	0	0
1	0.0948	9.478	Dwarfism_recessiv	-2.8174	0	0
1	0.0952	9.52	Dwarfism_recessiv	-2.8183	0	0
1	0.0953	9.527	Dwarfism_recessiv	-2.8185	0	0
1	0.0954	9.541	Dwarfism_recessiv	-2.8188	0	0
1	0.0955	9.546	Dwarfism_recessiv	-2.8189	0	0
1	0.0957	9.565	Dwarfism_recessiv	-2.8193	0	0
1	0.0957	9.573	Dwarfism_recessiv	-2.8195	0	0
1	0.0958	9.579	Dwarfism_recessiv	-2.8196	0	0
1	0.0959	9.592	Dwarfism_recessiv	-2.8199	0	0
1	0.096	9.604	Dwarfism_recessiv	-2.8201	0	0
1	0.0961	9.613	Dwarfism_recessiv	-2.8202	0	0
1	0.0963	9.629	Dwarfism_recessiv	-2.8204	0	0
1	0.0964	9.638	Dwarfism_recessiv	-2.8205	0	0
1	0.0965	9.65	Dwarfism_recessiv	-2.8207	0	0
1	0.0969	9.69	Dwarfism_recessiv	-2.8215	0	0
1	0.0973	9.729	Dwarfism_recessiv	-2.8225	0	0
1	0.0975	9.752	Dwarfism_recessiv	-2.8233	0	0
1	0.098	9.8	Dwarfism_recessiv	-2.824	0	0
1	0.0981	9.812	Dwarfism_recessiv	-2.8243	0	0
1	0.0983	9.826	Dwarfism_recessiv	-2.8246	0	0
1	0.0988	9.876	Dwarfism_recessiv	-2.8259	0	0
1	0.0988	9.882	Dwarfism_recessiv	-2.8261	0	0
1	0.0988	9.882	Dwarfism_recessiv	-2.8261	0	0
1	0.099	9.898	Dwarfism_recessiv	-2.8264	0	0
1	0.0996	9.962	Dwarfism_recessiv	-2.8278	0	0
1	0.0997	9.968	Dwarfism_recessiv	-2.8279	0	0
1	0.0997	9.97	Dwarfism_recessiv	-2.828	0	0
1	0.1001	10.008	Dwarfism_recessiv	-2.8288	0	0
1	0.1002	10.019	Dwarfism_recessiv	-2.829	0	0
1	0.1003	10.028	Dwarfism_recessiv	-2.8281	0	0
1	0.1006	10.061	Dwarfism_recessiv	-0.1287	0	0
1	0.1006	10.065	Dwarfism_recessiv	-0.1754	0	0
1	0.101	10.1	Dwarfism_recessiv	-2.8306	0	0
1	0.1011	10.107	Dwarfism_recessiv	-2.8308	0	0
1	0.1014	10.138	Dwarfism_recessiv	-2.8314	0	0
1	0.1016	10.164	Dwarfism_recessiv	-2.8319	0	0
1	0.102	10.204	Dwarfism_recessiv	-2.8329	0	0
1	0.1023	10.232	Dwarfism_recessiv	-2.8336	0	0
1	0.1024	10.239	Dwarfism_recessiv	-2.8338	0	0
1	0.1026	10.256	Dwarfism_recessiv	-2.8341	0	0
1	0.1026	10.257	Dwarfism_recessiv	-2.8341	0	0
1	0.1027	10.272	Dwarfism_recessiv	-2.8343	0	0
1	0.1031	10.31	Dwarfism_recessiv	-2.8351	0	0
1	0.1034	10.341	Dwarfism_recessiv	-2.8358	0	0
1	0.104	10.403	Dwarfism_recessiv	-2.8375	0	0
1	0.1041	10.408	Dwarfism_recessiv	-2.8376	0	0
1	0.1042	10.419	Dwarfism_recessiv	-2.8377	0	0
1	0.1044	10.445	Dwarfism_recessiv	-2.8382	0	0
1	0.1055	10.55	Dwarfism_recessiv	-2.8407	0	0
1	0.1056	10.559	Dwarfism_recessiv	-2.8409	0	0
1	0.1057	10.574	Dwarfism_recessiv	-2.8412	0	0
1	0.1059	10.588	Dwarfism_recessiv	-2.8416	0	0
1	0.1067	10.673	Dwarfism_recessiv	-2.8434	0	0
1	0.1068	10.682	Dwarfism_recessiv	-2.8437	0	0
1	0.107	10.699	Dwarfism_recessiv	-2.8441	0	0
1	0.1074	10.744	Dwarfism_recessiv	-2.8451	0	0
1	0.1076	10.757	Dwarfism_recessiv	-2.8453	0	0
1	0.1085	10.848	Dwarfism_recessiv	-2.8473	0	0
1	0.109	10.899	Dwarfism_recessiv	-2.8486	0	0
1	0.1093	10.934	Dwarfism_recessiv	-2.8494	0	0
1	0.1098	10.977	Dwarfism_recessiv	-2.8504	0	0
1	0.1101	11.015	Dwarfism_recessiv	-2.8512	0	0
1	0.1103	11.03	Dwarfism_recessiv	-2.8516	0	0
1	0.1105	11.052	Dwarfism_recessiv	-2.8521	0	0
1	0.1107	11.074	Dwarfism_recessiv	-2.8526	0	0
1	0.111	11.098	Dwarfism_recessiv	-2.8531	0	0
1	0.1111	11.112	Dwarfism_recessiv	-2.8534	0	0
1	0.1112	11.12	Dwarfism_recessiv	-2.8536	0	0
1	0.1117	11.166	Dwarfism_recessiv	-2.8547	0	0
1	0.1117	11.167	Dwarfism_recessiv	-2.8547	0	0
1	0.1117	11.168	Dwarfism_recessiv	-2.8547	0	0
1	0.1117	11.168	Dwarfism_recessiv	-2.8546	0	0
1	0.1117	11.168	Dwarfism_recessiv	-2.8545	0	0
1	0.1117	11.169	Dwarfism_recessiv	-2.8543	0	0
1	0.1119	11.187	Dwarfism_recessiv	-2.932	0	0
1	0.1119	11.192	Dwarfism_recessiv	-2.9153	0	0
1	0.1123	11.231	Dwarfism_recessiv	-2.8423	0	0
1	0.1129	11.287	Dwarfism_recessiv	-2.8492	0	0
1	0.113	11.298	Dwarfism_recessiv	-2.8514	0	0
1	0.113	11.305	Dwarfism_recessiv	-2.8522	0	0
1	0.1132	11.324	Dwarfism_recessiv	-2.8537	0	0
1	0.1133	11.329	Dwarfism_recessiv	-2.8539	0	0
1	0.1137	11.369	Dwarfism_recessiv	-2.8552	0	0
1	0.1142	11.419	Dwarfism_recessiv	-2.8552	0	0
1	0.1144	11.439	Dwarfism_recessiv	-2.8552	0	0
1	0.1147	11.465	Dwarfism_recessiv	-2.8552	0	0
1	0.1152	11.523	Dwarfism_recessiv	-2.8552	0	0
1	0.1156	11.564	Dwarfism_recessiv	-2.8552	0	0
1	0.1161	11.609	Dwarfism_recessiv	-2.8552	0	0
1	0.1165	11.653	Dwarfism_recessiv	-2.8552	0	0
1	0.1172	11.722	Dwarfism_recessiv	-2.8552	0	0
1	0.1179	11.789	Dwarfism_recessiv	-2.8552	0	0
1	0.118	11.8	Dwarfism_recessiv	-2.8552	0	0
1	0.1182	11.821	Dwarfism_recessiv	-2.8552	0	0
1	0.1182	11.823	Dwarfism_recessiv	-2.8552	0	0
1	0.1188	11.875	Dwarfism_recessiv	-2.8552	0	0
1	0.1192	11.925	Dwarfism_recessiv	-2.8553	0	0
1	0.1193	11.929	Dwarfism_recessiv	-2.8552	0	0
1	0.1195	11.951	Dwarfism_recessiv	-2.8551	0	0
1	0.1199	11.987	Dwarfism_recessiv	-2.8549	0	0
1	0.12	11.999	Dwarfism_recessiv	-2.8548	0	0
1	0.1201	12.007	Dwarfism_recessiv	-2.8548	0	0
1	0.1202	12.025	Dwarfism_recessiv	-2.8547	0	0
1	0.1203	12.033	Dwarfism_recessiv	-2.8546	0	0
1	0.1206	12.056	Dwarfism_recessiv	-2.8545	0	0
1	0.1212	12.119	Dwarfism_recessiv	-1.708	0	0
1	0.1224	12.239	Dwarfism_recessiv	-1.0777	0	0
1	0.1227	12.267	Dwarfism_recessiv	-0.983	0	0
1	0.1227	12.268	Dwarfism_recessiv	-0.9804	0	0
1	0.1228	12.284	Dwarfism_recessiv	-0.9308	0	0
1	0.1231	12.305	Dwarfism_recessiv	-2.853	0	0
1	0.1232	12.316	Dwarfism_recessiv	-2.8529	0	0
1	0.1233	12.327	Dwarfism_recessiv	-2.8529	0	0
1	0.1237	12.371	Dwarfism_recessiv	-2.8526	0	0
1	0.1239	12.39	Dwarfism_recessiv	-2.8525	0	0
1	0.1242	12.416	Dwarfism_recessiv	-2.8523	0	0
1	0.1245	12.452	Dwarfism_recessiv	-2.8521	0	0
1	0.1247	12.47	Dwarfism_recessiv	-2.852	0	0
1	0.1248	12.481	Dwarfism_recessiv	-2.8519	0	0
1	0.1252	12.515	Dwarfism_recessiv	-2.8517	0	0
1	0.1257	12.569	Dwarfism_recessiv	-2.8514	0	0
1	0.1267	12.675	Dwarfism_recessiv	-2.8501	0	0
1	0.127	12.704	Dwarfism_recessiv	-2.8498	0	0
1	0.1272	12.725	Dwarfism_recessiv	-2.8495	0	0
1	0.1273	12.732	Dwarfism_recessiv	-2.8494	0	0
1	0.1275	12.745	Dwarfism_recessiv	-2.8493	0	0
1	0.1275	12.752	Dwarfism_recessiv	-2.8492	0	0
1	0.1276	12.765	Dwarfism_recessiv	-2.8491	0	0
1	0.1283	12.83	Dwarfism_recessiv	-2.8484	0	0
1	0.1283	12.832	Dwarfism_recessiv	-2.8484	0	0
1	0.1284	12.843	Dwarfism_recessiv	-2.8483	0	0
1	0.1286	12.864	Dwarfism_recessiv	-2.8481	0	0
1	0.1287	12.868	Dwarfism_recessiv	-2.8481	0	0
1	0.1288	12.881	Dwarfism_recessiv	-2.848	0	0
1	0.1295	12.955	Dwarfism_recessiv	-2.8475	0	0
1	0.1298	12.978	Dwarfism_recessiv	-2.8473	0	0
1	0.1299	12.985	Dwarfism_recessiv	-2.8473	0	0
1	0.13	13.003	Dwarfism_recessiv	-2.8472	0	0
1	0.1309	13.085	Dwarfism_recessiv	-2.8471	0	0
1	0.131	13.105	Dwarfism_recessiv	-2.8471	0	0
1	0.1312	13.116	Dwarfism_recessiv	-2.8471	0	0
1	0.1313	13.129	Dwarfism_recessiv	-2.8471	0	0
1	0.1313	13.132	Dwarfism_recessiv	-2.8471	0	0
1	0.1314	13.138	Dwarfism_recessiv	-2.8471	0	0
1	0.1322	13.223	Dwarfism_recessiv	-2.8476	0	0
1	0.1322	13.224	Dwarfism_recessiv	-2.8476	0	0
1	0.133	13.298	Dwarfism_recessiv	-2.8471	0	0
1	0.1334	13.337	Dwarfism_recessiv	-2.8469	0	0
1	0.1337	13.37	Dwarfism_recessiv	-2.8467	0	0
1	0.1338	13.376	Dwarfism_recessiv	-2.8467	0	0
1	0.1339	13.385	Dwarfism_recessiv	-2.8466	0	0
1	0.1341	13.412	Dwarfism_recessiv	-2.8465	0	0
1	0.1343	13.428	Dwarfism_recessiv	-2.8464	0	0
1	0.1343	13.431	Dwarfism_recessiv	-2.8464	0	0
1	0.1345	13.447	Dwarfism_recessiv	-2.8463	0	0
1	0.1345	13.454	Dwarfism_recessiv	-2.8462	0	0
1	0.1346	13.464	Dwarfism_recessiv	-2.8462	0	0
1	0.1347	13.472	Dwarfism_recessiv	-2.8461	0	0
1	0.1347	13.472	Dwarfism_recessiv	-2.8461	0	0
1	0.1348	13.478	Dwarfism_recessiv	-2.8461	0	0
1	0.1349	13.493	Dwarfism_recessiv	-2.846	0	0
1	0.1349	13.494	Dwarfism_recessiv	-2.846	0	0
1	0.135	13.496	Dwarfism_recessiv	-2.846	0	0
1	0.1351	13.506	Dwarfism_recessiv	-2.8459	0	0
1	0.1351	13.506	Dwarfism_recessiv	-2.8459	0	0
1	0.1355	13.554	Dwarfism_recessiv	-2.8456	0	0
1	0.1356	13.56	Dwarfism_recessiv	-2.8456	0	0
1	0.1357	13.568	Dwarfism_recessiv	-2.8456	0	0
1	0.1359	13.586	Dwarfism_recessiv	-2.8454	0	0
1	0.1359	13.591	Dwarfism_recessiv	-2.8454	0	0
1	0.136	13.601	Dwarfism_recessiv	-2.8454	0	0
1	0.1361	13.611	Dwarfism_recessiv	-2.8453	0	0
1	0.1363	13.63	Dwarfism_recessiv	-2.8452	0	0
1	0.1364	13.635	Dwarfism_recessiv	-2.8452	0	0
1	0.1372	13.723	Dwarfism_recessiv	-2.8446	0	0
1	0.1373	13.734	Dwarfism_recessiv	-2.8446	0	0
1	0.1376	13.76	Dwarfism_recessiv	-2.8444	0	0
1	0.1377	13.773	Dwarfism_recessiv	-2.8443	0	0
1	0.138	13.799	Dwarfism_recessiv	-2.8442	0	0
1	0.1381	13.805	Dwarfism_recessiv	-2.8442	0	0
1	0.1382	13.823	Dwarfism_recessiv	-2.8441	0	0
1	0.1383	13.829	Dwarfism_recessiv	-2.844	0	0
1	0.1384	13.843	Dwarfism_recessiv	-2.8439	0	0
1	0.1386	13.857	Dwarfism_recessiv	-2.8439	0	0
1	0.1386	13.862	Dwarfism_recessiv	-2.8438	0	0
1	0.1387	13.873	Dwarfism_recessiv	-2.8438	0	0
1	0.139	13.902	Dwarfism_recessiv	-2.8435	0	0
1	0.1391	13.913	Dwarfism_recessiv	-2.8434	0	0
1	0.1393	13.933	Dwarfism_recessiv	-2.8433	0	0
1	0.1397	13.967	Dwarfism_recessiv	-2.8431	0	0
1	0.14	14	Dwarfism_recessiv	-2.843	0	0
1	0.1402	14.022	Dwarfism_recessiv	-2.8429	0	0
1	0.1403	14.029	Dwarfism_recessiv	-2.8429	0	0
1	0.1403	14.029	Dwarfism_recessiv	-2.8429	0	0
1	0.1404	14.039	Dwarfism_recessiv	-2.8428	0	0
1	0.1405	14.051	Dwarfism_recessiv	-2.8427	0	0
1	0.1406	14.059	Dwarfism_recessiv	-2.8427	0	0
1	0.1409	14.089	Dwarfism_recessiv	-2.8425	0	0
1	0.141	14.1	Dwarfism_recessiv	-2.8425	0	0
1	0.1412	14.121	Dwarfism_recessiv	-2.8423	0	0
1	0.1412	14.124	Dwarfism_recessiv	-2.8423	0	0
1	0.1413	14.133	Dwarfism_recessiv	-2.8423	0	0
1	0.1415	14.154	Dwarfism_recessiv	-2.8421	0	0
1	0.1417	14.171	Dwarfism_recessiv	-2.8421	0	0
1	0.1417	14.173	Dwarfism_recessiv	-2.842	0	0
1	0.1419	14.188	Dwarfism_recessiv	-2.842	0	0
1	0.142	14.202	Dwarfism_recessiv	-2.8419	0	0
1	0.1422	14.217	Dwarfism_recessiv	-2.8418	0	0
1	0.1423	14.227	Dwarfism_recessiv	-2.8417	0	0
1	0.1425	14.249	Dwarfism_recessiv	-2.8416	0	0
1	0.1425	14.253	Dwarfism_recessiv	-2.8416	0	0
1	0.1428	14.282	Dwarfism_recessiv	-2.8413	0	0
1	0.1432	14.323	Dwarfism_recessiv	-2.8409	0	0
1	0.1433	14.334	Dwarfism_recessiv	-2.8408	0	0
1	0.1438	14.379	Dwarfism_recessiv	-2.8406	0	0
1	0.1439	14.39	Dwarfism_recessiv	-2.8406	0	0
1	0.1439	14.392	Dwarfism_recessiv	-2.8406	0	0
1	0.1443	14.429	Dwarfism_recessiv	-2.8406	0	0
1	0.1446	14.456	Dwarfism_recessiv	-2.8404	0	0
1	0.1447	14.472	Dwarfism_recessiv	-2.8403	0	0
1	0.1448	14.484	Dwarfism_recessiv	-2.8402	0	0
1	0.1449	14.488	Dwarfism_recessiv	-2.8402	0	0
1	0.145	14.504	Dwarfism_recessiv	-2.8401	0	0
1	0.1451	14.508	Dwarfism_recessiv	-2.8401	0	0
1	0.1453	14.535	Dwarfism_recessiv	-2.8399	0	0
1	0.1454	14.537	Dwarfism_recessiv	-2.8399	0	0
1	0.1454	14.542	Dwarfism_recessiv	-2.8399	0	0
1	0.1456	14.559	Dwarfism_recessiv	-2.8396	0	0
1	0.1456	14.56	Dwarfism_recessiv	-2.8396	0	0
1	0.1456	14.563	Dwarfism_recessiv	-2.8395	0	0
1	0.1462	14.616	Dwarfism_recessiv	-2.8387	0	0
1	0.1465	14.652	Dwarfism_recessiv	-2.8382	0	0
1	0.1467	14.674	Dwarfism_recessiv	-2.838	0	0
1	0.1468	14.683	Dwarfism_recessiv	-2.8379	0	0
1	0.1471	14.708	Dwarfism_recessiv	-2.8377	0	0
1	0.1473	14.733	Dwarfism_recessiv	-2.8375	0	0
1	0.1474	14.737	Dwarfism_recessiv	-2.8375	0	0
1	0.1475	14.752	Dwarfism_recessiv	-2.8375	0	0
1	0.1477	14.771	Dwarfism_recessiv	-2.8374	0	0
1	0.1479	14.786	Dwarfism_recessiv	-2.8374	0	0
1	0.1479	14.79	Dwarfism_recessiv	-2.8374	0	0
1	0.1479	14.793	Dwarfism_recessiv	-2.8374	0	0
1	0.1485	14.85	Dwarfism_recessiv	-2.8376	0	0
1	0.1486	14.856	Dwarfism_recessiv	-2.8376	0	0
1	0.1487	14.866	Dwarfism_recessiv	-2.8377	0	0
1	0.1488	14.881	Dwarfism_recessiv	-2.8378	0	0
1	0.1489	14.892	Dwarfism_recessiv	-2.8379	0	0
1	0.149	14.896	Dwarfism_recessiv	-2.8379	0	0
1	0.1492	14.919	Dwarfism_recessiv	-2.8377	0	0
1	0.1494	14.938	Dwarfism_recessiv	-2.8376	0	0
1	0.1495	14.951	Dwarfism_recessiv	-2.8376	0	0
1	0.1496	14.956	Dwarfism_recessiv	-2.8375	0	0
1	0.1497	14.969	Dwarfism_recessiv	-2.8375	0	0
1	0.1499	14.988	Dwarfism_recessiv	-2.8372	0	0
1	0.1501	15.006	Dwarfism_recessiv	-2.837	0	0
1	0.1501	15.014	Dwarfism_recessiv	-2.8369	0	0
1	0.1503	15.032	Dwarfism_recessiv	-2.8367	0	0
1	0.1505	15.053	Dwarfism_recessiv	-2.8366	0	0
1	0.1506	15.057	Dwarfism_recessiv	-2.8365	0	0
1	0.1508	15.08	Dwarfism_recessiv	-2.8364	0	0
1	0.151	15.098	Dwarfism_recessiv	-2.8364	0	0
1	0.1511	15.109	Dwarfism_recessiv	-2.8363	0	0
1	0.1512	15.117	Dwarfism_recessiv	-2.8363	0	0
1	0.1516	15.16	Dwarfism_recessiv	-2.8364	0	0
1	0.1517	15.173	Dwarfism_recessiv	-2.8363	0	0
1	0.1519	15.186	Dwarfism_recessiv	-2.8362	0	0
1	0.1519	15.189	Dwarfism_recessiv	-2.8362	0	0
1	0.152	15.199	Dwarfism_recessiv	-2.8362	0	0
1	0.152	15.205	Dwarfism_recessiv	-2.8361	0	0
1	0.1522	15.218	Dwarfism_recessiv	-2.836	0	0
1	0.1523	15.231	Dwarfism_recessiv	-2.836	0	0
1	0.1525	15.248	Dwarfism_recessiv	-2.8359	0	0
1	0.1527	15.266	Dwarfism_recessiv	-2.8356	0	0
1	0.1528	15.281	Dwarfism_recessiv	-2.8355	0	0
1	0.1531	15.309	Dwarfism_recessiv	-2.8352	0	0
1	0.1532	15.321	Dwarfism_recessiv	-2.8351	0	0
1	0.1532	15.322	Dwarfism_recessiv	-2.8351	0	0
1	0.1533	15.334	Dwarfism_recessiv	-2.835	0	0
1	0.1536	15.365	Dwarfism_recessiv	-2.8349	0	0
1	0.1537	15.373	Dwarfism_recessiv	-2.8349	0	0
1	0.1538	15.38	Dwarfism_recessiv	-2.8349	0	0
1	0.1542	15.418	Dwarfism_recessiv	-2.8349	0	0
1	0.1543	15.431	Dwarfism_recessiv	-2.8348	0	0
1	0.1544	15.437	Dwarfism_recessiv	-2.8348	0	0
1	0.1545	15.448	Dwarfism_recessiv	-2.8347	0	0
1	0.1549	15.492	Dwarfism_recessiv	-2.8345	0	0
1	0.155	15.496	Dwarfism_recessiv	-2.8345	0	0
1	0.1551	15.511	Dwarfism_recessiv	-2.8344	0	0
1	0.1552	15.517	Dwarfism_recessiv	-2.8343	0	0
1	0.1553	15.53	Dwarfism_recessiv	-2.8343	0	0
1	0.1554	15.544	Dwarfism_recessiv	-2.8342	0	0
1	0.1555	15.548	Dwarfism_recessiv	-2.8342	0	0
1	0.1555	15.553	Dwarfism_recessiv	-2.8341	0	0
1	0.1557	15.567	Dwarfism_recessiv	-2.834	0	0
1	0.1559	15.59	Dwarfism_recessiv	-2.8339	0	0
1	0.1561	15.612	Dwarfism_recessiv	-2.8338	0	0
1	0.1562	15.625	Dwarfism_recessiv	-2.8337	0	0
1	0.1564	15.636	Dwarfism_recessiv	-2.8336	0	0
1	0.1566	15.659	Dwarfism_recessiv	-2.8335	0	0
1	0.1567	15.673	Dwarfism_recessiv	-2.8334	0	0
1	0.1569	15.688	Dwarfism_recessiv	-2.8334	0	0
1	0.1569	15.694	Dwarfism_recessiv	-2.8333	0	0
1	0.1571	15.712	Dwarfism_recessiv	-2.8332	0	0
1	0.1576	15.757	Dwarfism_recessiv	-2.833	0	0
1	0.1577	15.771	Dwarfism_recessiv	-2.8329	0	0
1	0.1579	15.794	Dwarfism_recessiv	-2.8328	0	0
1	0.1581	15.805	Dwarfism_recessiv	-2.8327	0	0
1	0.1582	15.816	Dwarfism_recessiv	-2.8327	0	0
1	0.1583	15.83	Dwarfism_recessiv	-2.8325	0	0
1	0.1584	15.84	Dwarfism_recessiv	-2.8324	0	0
1	0.1587	15.874	Dwarfism_recessiv	-2.8322	0	0
1	0.1587	15.875	Dwarfism_recessiv	-2.8322	0	0
1	0.159	15.896	Dwarfism_recessiv	-2.8321	0	0
1	0.159	15.901	Dwarfism_recessiv	-2.8321	0	0
1	0.1591	15.911	Dwarfism_recessiv	-2.8321	0	0
1	0.1592	15.92	Dwarfism_recessiv	-2.8321	0	0
1	0.1592	15.92	Dwarfism_recessiv	-2.8321	0	0
1	0.1595	15.949	Dwarfism_recessiv	-2.8319	0	0
1	0.1596	15.962	Dwarfism_recessiv	-2.8318	0	0
1	0.1597	15.97	Dwarfism_recessiv	-2.8318	0	0
1	0.16	15.998	Dwarfism_recessiv	-2.8316	0	0
1	0.16	16.003	Dwarfism_recessiv	-2.8316	0	0
1	0.1601	16.009	Dwarfism_recessiv	-2.8315	0	0
1	0.1602	16.024	Dwarfism_recessiv	-2.8315	0	0
1	0.1605	16.046	Dwarfism_recessiv	-2.8313	0	0
1	0.1605	16.054	Dwarfism_recessiv	-2.8313	0	0
1	0.1606	16.063	Dwarfism_recessiv	-2.8312	0	0
1	0.1608	16.078	Dwarfism_recessiv	-2.8312	0	0
1	0.1608	16.083	Dwarfism_recessiv	-2.8311	0	0
1	0.1611	16.106	Dwarfism_recessiv	-2.831	0	0
1	0.1612	16.121	Dwarfism_recessiv	-2.8309	0	0
1	0.1613	16.133	Dwarfism_recessiv	-2.8309	0	0
1	0.1614	16.139	Dwarfism_recessiv	-2.8307	0	0
1	0.1616	16.157	Dwarfism_recessiv	-2.8302	0	0
1	0.1616	16.162	Dwarfism_recessiv	-2.8301	0	0
1	0.1616	16.163	Dwarfism_recessiv	-2.8301	0	0
1	0.1618	16.176	Dwarfism_recessiv	-2.8298	0	0
1	0.1619	16.186	Dwarfism_recessiv	-2.8296	0	0
1	0.162	16.196	Dwarfism_recessiv	-2.8293	0	0
1	0.1621	16.208	Dwarfism_recessiv	-2.8291	0	0
1	0.1622	16.22	Dwarfism_recessiv	-2.8289	0	0
1	0.1623	16.231	Dwarfism_recessiv	-2.8287	0	0
1	0.1624	16.244	Dwarfism_recessiv	-2.8285	0	0
1	0.1626	16.255	Dwarfism_recessiv	-2.8283	0	0
1	0.1627	16.265	Dwarfism_recessiv	-2.8282	0	0
1	0.1628	16.282	Dwarfism_recessiv	-2.828	0	0
1	0.1629	16.293	Dwarfism_recessiv	-2.8279	0	0
1	0.1631	16.307	Dwarfism_recessiv	-2.8278	0	0
1	0.1632	16.32	Dwarfism_recessiv	-2.8277	0	0
1	0.1632	16.324	Dwarfism_recessiv	-2.8277	0	0
1	0.1634	16.338	Dwarfism_recessiv	-2.8276	0	0
1	0.1636	16.36	Dwarfism_recessiv	-2.8276	0	0
1	0.1638	16.379	Dwarfism_recessiv	-2.8276	0	0
1	0.164	16.4	Dwarfism_recessiv	-2.8277	0	0
1	0.1642	16.419	Dwarfism_recessiv	-2.8278	0	0
1	0.1643	16.429	Dwarfism_recessiv	-2.8278	0	0
1	0.1644	16.44	Dwarfism_recessiv	-2.8279	0	0
1	0.1646	16.46	Dwarfism_recessiv	-2.8282	0	0
1	0.1646	16.461	Dwarfism_recessiv	-2.8282	0	0
1	0.165	16.5	Dwarfism_recessiv	-2.8288	0	0
1	0.1651	16.508	Dwarfism_recessiv	-2.8287	0	0
1	0.1652	16.523	Dwarfism_recessiv	-2.8287	0	0
1	0.1653	16.532	Dwarfism_recessiv	-2.8285	0	0
1	0.1655	16.547	Dwarfism_recessiv	-2.8281	0	0
1	0.1659	16.586	Dwarfism_recessiv	-2.8273	0	0
1	0.1661	16.613	Dwarfism_recessiv	-2.8269	0	0
1	0.1664	16.64	Dwarfism_recessiv	-2.8266	0	0
1	0.1665	16.65	Dwarfism_recessiv	-2.8265	0	0
1	0.1666	16.664	Dwarfism_recessiv	-2.8264	0	0
1	0.1672	16.724	Dwarfism_recessiv	-2.8262	0	0
1	0.1677	16.771	Dwarfism_recessiv	-2.8265	0	0
1	0.1678	16.777	Dwarfism_recessiv	-2.8265	0	0
1	0.1678	16.781	Dwarfism_recessiv	-2.8265	0	0
1	0.1678	16.783	Dwarfism_recessiv	-2.8266	0	0
1	0.168	16.8	Dwarfism_recessiv	-2.8267	0	0
1	0.1681	16.807	Dwarfism_recessiv	-2.8268	0	0
1	0.1681	16.812	Dwarfism_recessiv	-2.8269	0	0
1	0.1682	16.82	Dwarfism_recessiv	-2.827	0	0
1	0.1682	16.82	Dwarfism_recessiv	-2.827	0	0
1	0.1684	16.835	Dwarfism_recessiv	-2.8269	0	0
1	0.1687	16.869	Dwarfism_recessiv	-2.8267	0	0
1	0.1694	16.944	Dwarfism_recessiv	-2.755	0	0
1	0.1695	16.947	Dwarfism_recessiv	-2.7525	0	0
1	0.1696	16.957	Dwarfism_recessiv	-2.7442	0	0
1	0.17	17.004	Dwarfism_recessiv	-2.7048	0	0
1	0.1703	17.033	Dwarfism_recessiv	-2.6816	0	0
1	0.1704	17.038	Dwarfism_recessiv	-2.678	0	0
1	0.1706	17.063	Dwarfism_recessiv	-2.6592	0	0
1	0.1708	17.08	Dwarfism_recessiv	-2.6472	0	0
1	0.1708	17.081	Dwarfism_recessiv	-2.6465	0	0
1	0.1708	17.082	Dwarfism_recessiv	-2.6458	0	0
1	0.1709	17.091	Dwarfism_recessiv	-2.6393	0	0
1	0.171	17.101	Dwarfism_recessiv	-2.6326	0	0
1	0.1711	17.11	Dwarfism_recessiv	-2.6258	0	0
1	0.1713	17.125	Dwarfism_recessiv	-2.6158	0	0
1	0.1713	17.128	Dwarfism_recessiv	-2.6136	0	0
1	0.1714	17.136	Dwarfism_recessiv	-2.6087	0	0
1	0.1715	17.15	Dwarfism_recessiv	-2.5995	0	0
1	0.1717	17.171	Dwarfism_recessiv	-2.5857	0	0
1	0.1719	17.187	Dwarfism_recessiv	-2.5761	0	0
1	0.172	17.201	Dwarfism_recessiv	-2.5673	0	0
1	0.1721	17.212	Dwarfism_recessiv	-2.5603	0	0
1	0.1722	17.221	Dwarfism_recessiv	-2.5552	0	0
1	0.1724	17.236	Dwarfism_recessiv	-2.546	0	0
1	0.1725	17.246	Dwarfism_recessiv	-2.5404	0	0
1	0.1725	17.249	Dwarfism_recessiv	-2.5387	0	0
1	0.1726	17.263	Dwarfism_recessiv	-2.5307	0	0
1	0.1727	17.274	Dwarfism_recessiv	-2.5245	0	0
1	0.1728	17.278	Dwarfism_recessiv	-2.522	0	0
1	0.1729	17.292	Dwarfism_recessiv	-2.5143	0	0
1	0.173	17.302	Dwarfism_recessiv	-2.5088	0	0
1	0.1732	17.316	Dwarfism_recessiv	-2.5017	0	0
1	0.1733	17.326	Dwarfism_recessiv	-2.4963	0	0
1	0.1734	17.337	Dwarfism_recessiv	-2.4906	0	0
1	0.1736	17.355	Dwarfism_recessiv	-2.4808	0	0
1	0.1737	17.372	Dwarfism_recessiv	-2.4724	0	0
1	0.1737	17.373	Dwarfism_recessiv	-2.4716	0	0
1	0.1737	17.374	Dwarfism_recessiv	-2.4713	0	0
1	0.1738	17.376	Dwarfism_recessiv	-2.4701	0	0
1	0.1738	17.376	Dwarfism_recessiv	-2.4701	0	0
1	0.1738	17.383	Dwarfism_recessiv	-2.4667	0	0
1	0.174	17.398	Dwarfism_recessiv	-2.4592	0	0
1	0.1741	17.409	Dwarfism_recessiv	-2.4537	0	0
1	0.1745	17.446	Dwarfism_recessiv	-2.4359	0	0
1	0.1745	17.451	Dwarfism_recessiv	-2.4335	0	0
1	0.1746	17.463	Dwarfism_recessiv	-2.4279	0	0
1	0.1746	17.465	Dwarfism_recessiv	-2.4272	0	0
1	0.1748	17.48	Dwarfism_recessiv	-2.4201	0	0
1	0.1749	17.491	Dwarfism_recessiv	-2.4154	0	0
1	0.1751	17.508	Dwarfism_recessiv	-2.4075	0	0
1	0.1751	17.51	Dwarfism_recessiv	-2.4064	0	0
1	0.1752	17.524	Dwarfism_recessiv	-2.4002	0	0
1	0.1753	17.525	Dwarfism_recessiv	-2.3999	0	0
1	0.1753	17.525	Dwarfism_recessiv	-2.3999	0	0
1	0.1753	17.526	Dwarfism_recessiv	-2.3998	0	0
1	0.1753	17.526	Dwarfism_recessiv	-2.3997	0	0
1	0.1753	17.526	Dwarfism_recessiv	-2.3997	0	0
1	0.1753	17.526	Dwarfism_recessiv	-2.3995	0	0
1	0.1753	17.526	Dwarfism_recessiv	-2.3993	0	0
1	0.1753	17.527	Dwarfism_recessiv	-2.3992	0	0
1	0.1755	17.548	Dwarfism_recessiv	-2.3898	0	0
1	0.1756	17.557	Dwarfism_recessiv	-2.386	0	0
1	0.1758	17.575	Dwarfism_recessiv	-2.3782	0	0
1	0.1759	17.588	Dwarfism_recessiv	-2.3731	0	0
1	0.1761	17.61	Dwarfism_recessiv	-2.3637	0	0
1	0.1761	17.612	Dwarfism_recessiv	-2.3629	0	0
1	0.1763	17.631	Dwarfism_recessiv	-2.3553	0	0
1	0.1763	17.631	Dwarfism_recessiv	-2.3551	0	0
1	0.1763	17.631	Dwarfism_recessiv	-2.355	0	0
1	0.1763	17.634	Dwarfism_recessiv	-2.3541	0	0
1	0.1763	17.634	Dwarfism_recessiv	-2.3541	0	0
1	0.1764	17.636	Dwarfism_recessiv	-2.3533	0	0
1	0.1765	17.646	Dwarfism_recessiv	-2.3491	0	0
1	0.1766	17.659	Dwarfism_recessiv	-2.3438	0	0
1	0.1767	17.668	Dwarfism_recessiv	-2.3405	0	0
1	0.1769	17.688	Dwarfism_recessiv	-2.3326	0	0
1	0.1773	17.726	Dwarfism_recessiv	-2.3181	0	0
1	0.1773	17.727	Dwarfism_recessiv	-2.3177	0	0
1	0.1774	17.744	Dwarfism_recessiv	-2.3114	0	0
1	0.1775	17.75	Dwarfism_recessiv	-2.3091	0	0
1	0.1775	17.751	Dwarfism_recessiv	-2.3087	0	0
1	0.1777	17.766	Dwarfism_recessiv	-2.3032	0	0
1	0.1779	17.787	Dwarfism_recessiv	-2.2957	0	0
1	0.178	17.796	Dwarfism_recessiv	-2.2922	0	0
1	0.1781	17.808	Dwarfism_recessiv	-2.2879	0	0
1	0.1782	17.825	Dwarfism_recessiv	-2.2821	0	0
1	0.1784	17.84	Dwarfism_recessiv	-2.2766	0	0
1	0.1787	17.87	Dwarfism_recessiv	-2.2662	0	0
1	0.1789	17.889	Dwarfism_recessiv	-2.2598	0	0
1	0.179	17.903	Dwarfism_recessiv	-2.2552	0	0
1	0.1791	17.912	Dwarfism_recessiv	-2.2523	0	0
1	0.1793	17.927	Dwarfism_recessiv	-2.2472	0	0
1	0.1794	17.939	Dwarfism_recessiv	-2.2433	0	0
1	0.1795	17.952	Dwarfism_recessiv	-2.2391	0	0
1	0.1796	17.956	Dwarfism_recessiv	-2.2378	0	0
1	0.1796	17.963	Dwarfism_recessiv	-2.2354	0	0
1	0.1798	17.982	Dwarfism_recessiv	-2.2295	0	0
1	0.18	17.998	Dwarfism_recessiv	-2.2243	0	0
1	0.1801	18.006	Dwarfism_recessiv	-2.2218	0	0
1	0.1804	18.04	Dwarfism_recessiv	-2.2113	0	0
1	0.1805	18.051	Dwarfism_recessiv	-2.208	0	0
1	0.1807	18.067	Dwarfism_recessiv	-2.2029	0	0
1	0.1808	18.079	Dwarfism_recessiv	-2.1994	0	0
1	0.1809	18.085	Dwarfism_recessiv	-2.1975	0	0
1	0.181	18.095	Dwarfism_recessiv	-2.1945	0	0
1	0.1812	18.121	Dwarfism_recessiv	-2.1869	0	0
1	0.1813	18.131	Dwarfism_recessiv	-2.1839	0	0
1	0.1814	18.142	Dwarfism_recessiv	-2.1806	0	0
1	0.1815	18.154	Dwarfism_recessiv	-2.1772	0	0
1	0.1816	18.165	Dwarfism_recessiv	-2.1741	0	0
1	0.1818	18.177	Dwarfism_recessiv	-2.1707	0	0
1	0.182	18.197	Dwarfism_recessiv	-2.1651	0	0
1	0.182	18.201	Dwarfism_recessiv	-2.1638	0	0
1	0.1821	18.213	Dwarfism_recessiv	-2.1606	0	0
1	0.1823	18.23	Dwarfism_recessiv	-2.1557	0	0
1	0.1823	18.233	Dwarfism_recessiv	-2.1549	0	0
1	0.1825	18.247	Dwarfism_recessiv	-2.1511	0	0
1	0.1826	18.258	Dwarfism_recessiv	-2.1481	0	0
1	0.1827	18.268	Dwarfism_recessiv	-2.1453	0	0
1	0.1827	18.272	Dwarfism_recessiv	-2.1443	0	0
1	0.1828	18.279	Dwarfism_recessiv	-2.1425	0	0
1	0.1828	18.279	Dwarfism_recessiv	-2.1425	0	0
1	0.1828	18.279	Dwarfism_recessiv	-2.1423	0	0
1	0.1828	18.279	Dwarfism_recessiv	-2.1423	0	0
1	0.183	18.301	Dwarfism_recessiv	-2.1364	0	0
1	0.183	18.302	Dwarfism_recessiv	-2.1362	0	0
1	0.1832	18.322	Dwarfism_recessiv	-2.1308	0	0
1	0.1833	18.331	Dwarfism_recessiv	-2.1285	0	0
1	0.1834	18.337	Dwarfism_recessiv	-2.1268	0	0
1	0.1835	18.352	Dwarfism_recessiv	-2.1231	0	0
1	0.1836	18.361	Dwarfism_recessiv	-2.1208	0	0
1	0.1837	18.372	Dwarfism_recessiv	-2.1177	0	0
1	0.1838	18.383	Dwarfism_recessiv	-2.1149	0	0
1	0.1841	18.408	Dwarfism_recessiv	-2.1086	0	0
1	0.1842	18.417	Dwarfism_recessiv	-2.1063	0	0
1	0.1844	18.436	Dwarfism_recessiv	-2.1015	0	0
1	0.1844	18.441	Dwarfism_recessiv	-2.1004	0	0
1	0.1845	18.453	Dwarfism_recessiv	-2.0973	0	0
1	0.1846	18.464	Dwarfism_recessiv	-2.0946	0	0
1	0.1848	18.481	Dwarfism_recessiv	-2.0904	0	0
1	0.1849	18.488	Dwarfism_recessiv	-2.0889	0	0
1	0.1849	18.491	Dwarfism_recessiv	-2.088	0	0
1	0.185	18.498	Dwarfism_recessiv	-2.0862	0	0
1	0.1851	18.514	Dwarfism_recessiv	-2.0824	0	0
1	0.1852	18.524	Dwarfism_recessiv	-2.08	0	0
1	0.1854	18.544	Dwarfism_recessiv	-2.0752	0	0
1	0.1859	18.588	Dwarfism_recessiv	-2.0649	0	0
1	0.1859	18.593	Dwarfism_recessiv	-2.0638	0	0
1	0.1862	18.618	Dwarfism_recessiv	-2.058	0	0
1	0.1865	18.653	Dwarfism_recessiv	-2.0501	0	0
1	0.1868	18.68	Dwarfism_recessiv	-2.0441	0	0
1	0.1869	18.689	Dwarfism_recessiv	-2.042	0	0
1	0.1871	18.711	Dwarfism_recessiv	-2.0371	0	0
1	0.1872	18.725	Dwarfism_recessiv	-2.0342	0	0
1	0.1873	18.728	Dwarfism_recessiv	-2.0335	0	0
1	0.1874	18.739	Dwarfism_recessiv	-2.031	0	0
1	0.1875	18.754	Dwarfism_recessiv	-2.0278	0	0
1	0.1877	18.773	Dwarfism_recessiv	-2.0237	0	0
1	0.1877	18.774	Dwarfism_recessiv	-2.0234	0	0
1	0.1879	18.789	Dwarfism_recessiv	-2.0203	0	0
1	0.188	18.799	Dwarfism_recessiv	-2.018	0	0
1	0.1884	18.836	Dwarfism_recessiv	-2.0103	0	0
1	0.1884	18.84	Dwarfism_recessiv	-2.0094	0	0
1	0.1887	18.865	Dwarfism_recessiv	-2.0042	0	0
1	0.1887	18.875	Dwarfism_recessiv	-2.0022	0	0
1	0.1897	18.974	Dwarfism_recessiv	-1.9823	0	0
1	0.19	19.003	Dwarfism_recessiv	-1.9766	0	0
1	0.1902	19.015	Dwarfism_recessiv	-1.9742	0	0
1	0.1904	19.041	Dwarfism_recessiv	-1.9691	0	0
1	0.1907	19.07	Dwarfism_recessiv	-1.9636	0	0
1	0.1909	19.088	Dwarfism_recessiv	-1.9602	0	0
1	0.1911	19.11	Dwarfism_recessiv	-1.9561	0	0
1	0.1912	19.122	Dwarfism_recessiv	-1.9537	0	0
1	0.1913	19.134	Dwarfism_recessiv	-1.9517	0	0
1	0.1915	19.146	Dwarfism_recessiv	-1.9494	0	0
1	0.1915	19.153	Dwarfism_recessiv	-1.948	0	0
1	0.1917	19.165	Dwarfism_recessiv	-1.9458	0	0
1	0.1918	19.177	Dwarfism_recessiv	-1.9437	0	0
1	0.1919	19.192	Dwarfism_recessiv	-1.941	0	0
1	0.1921	19.209	Dwarfism_recessiv	-1.9378	0	0
1	0.1922	19.22	Dwarfism_recessiv	-1.9359	0	0
1	0.1923	19.232	Dwarfism_recessiv	-1.9337	0	0
1	0.1923	19.232	Dwarfism_recessiv	-1.9337	0	0
1	0.1926	19.26	Dwarfism_recessiv	-1.9286	0	0
1	0.1928	19.282	Dwarfism_recessiv	-1.9249	0	0
1	0.1937	19.371	Dwarfism_recessiv	-1.9093	0	0
1	0.194	19.399	Dwarfism_recessiv	-1.9046	0	0
1	0.1941	19.406	Dwarfism_recessiv	-1.9034	0	0
1	0.1942	19.419	Dwarfism_recessiv	-1.9014	0	0
1	0.1946	19.459	Dwarfism_recessiv	-1.8947	0	0
1	0.1948	19.483	Dwarfism_recessiv	-1.8907	0	0
1	0.195	19.503	Dwarfism_recessiv	-1.8874	0	0
1	0.1952	19.515	Dwarfism_recessiv	-1.8854	0	0
1	0.1953	19.528	Dwarfism_recessiv	-1.8834	0	0
1	0.1953	19.534	Dwarfism_recessiv	-1.8824	0	0
1	0.1957	19.568	Dwarfism_recessiv	-1.8769	0	0
1	0.1959	19.586	Dwarfism_recessiv	-1.8742	0	0
1	0.1959	19.594	Dwarfism_recessiv	-1.8729	0	0
1	0.196	19.602	Dwarfism_recessiv	-1.8716	0	0
1	0.1963	19.627	Dwarfism_recessiv	-1.8677	0	0
1	0.1967	19.668	Dwarfism_recessiv	-1.8614	0	0
1	0.1967	19.67	Dwarfism_recessiv	-1.861	0	0
1	0.1978	19.776	Dwarfism_recessiv	-1.845	0	0
1	0.1979	19.791	Dwarfism_recessiv	-1.8428	0	0
1	0.1985	19.847	Dwarfism_recessiv	-1.8347	0	0
1	0.1986	19.857	Dwarfism_recessiv	-1.8331	0	0
1	0.1987	19.871	Dwarfism_recessiv	-1.8312	0	0
1	0.1988	19.884	Dwarfism_recessiv	-1.8293	0	0
1	0.199	19.905	Dwarfism_recessiv	-1.8263	0	0
1	0.1992	19.917	Dwarfism_recessiv	-1.8246	0	0
1	0.1993	19.932	Dwarfism_recessiv	-1.8224	0	0
1	0.1993	19.934	Dwarfism_recessiv	-1.8221	0	0
1	0.1998	19.984	Dwarfism_recessiv	-1.8151	0	0
1	0.2002	20.016	Dwarfism_recessiv	-1.8108	0	0
1	0.2003	20.033	Dwarfism_recessiv	-1.8084	0	0
1	0.2005	20.054	Dwarfism_recessiv	-1.8055	0	0
1	0.2008	20.077	Dwarfism_recessiv	-1.8024	0	0
1	0.2009	20.089	Dwarfism_recessiv	-1.8009	0	0
1	0.201	20.101	Dwarfism_recessiv	-1.7992	0	0
1	0.2011	20.105	Dwarfism_recessiv	-1.7986	0	0
1	0.2011	20.11	Dwarfism_recessiv	-1.798	0	0
1	0.2016	20.161	Dwarfism_recessiv	-1.7913	0	0
1	0.2019	20.194	Dwarfism_recessiv	-1.787	0	0
1	0.202	20.202	Dwarfism_recessiv	-1.7859	0	0
1	0.2023	20.228	Dwarfism_recessiv	-1.7825	0	0
1	0.2025	20.248	Dwarfism_recessiv	-1.78	0	0
1	0.2026	20.26	Dwarfism_recessiv	-1.7785	0	0
1	0.2029	20.293	Dwarfism_recessiv	-1.7743	0	0
1	0.2034	20.336	Dwarfism_recessiv	-1.7688	0	0
1	0.2034	20.341	Dwarfism_recessiv	-1.7682	0	0
1	0.2036	20.361	Dwarfism_recessiv	-1.7658	0	0
1	0.2037	20.367	Dwarfism_recessiv	-1.7651	0	0
1	0.2038	20.383	Dwarfism_recessiv	-1.7631	0	0
1	0.2039	20.388	Dwarfism_recessiv	-1.7625	0	0
1	0.2045	20.451	Dwarfism_recessiv	-1.7548	0	0
1	0.2048	20.479	Dwarfism_recessiv	-1.7514	0	0
1	0.2051	20.513	Dwarfism_recessiv	-1.7474	0	0
1	0.2052	20.524	Dwarfism_recessiv	-1.7462	0	0
1	0.2055	20.55	Dwarfism_recessiv	-1.7431	0	0
1	0.2057	20.575	Dwarfism_recessiv	-1.7402	0	0
1	0.2063	20.626	Dwarfism_recessiv	-1.7343	0	0
1	0.2064	20.638	Dwarfism_recessiv	-1.7329	0	0
1	0.2066	20.656	Dwarfism_recessiv	-1.7309	0	0
1	0.2066	20.659	Dwarfism_recessiv	-1.7306	0	0
1	0.2068	20.679	Dwarfism_recessiv	-1.7283	0	0
1	0.2069	20.687	Dwarfism_recessiv	-1.7274	0	0
1	0.2069	20.688	Dwarfism_recessiv	-1.7273	0	0
1	0.207	20.696	Dwarfism_recessiv	-1.7264	0	0
1	0.2071	20.709	Dwarfism_recessiv	-1.725	0	0
1	0.2072	20.719	Dwarfism_recessiv	-1.7239	0	0
1	0.2074	20.736	Dwarfism_recessiv	-1.722	0	0
1	0.2077	20.767	Dwarfism_recessiv	-1.7186	0	0
1	0.2081	20.815	Dwarfism_recessiv	-1.7134	0	0
1	0.2082	20.825	Dwarfism_recessiv	-1.7122	0	0
1	0.2084	20.841	Dwarfism_recessiv	-1.7106	0	0
1	0.2086	20.856	Dwarfism_recessiv	-1.7089	0	0
1	0.2087	20.868	Dwarfism_recessiv	-1.7076	0	0
1	0.2095	20.947	Dwarfism_recessiv	-1.6993	0	0
1	0.2106	21.06	Dwarfism_recessiv	-1.6878	0	0
1	0.2108	21.081	Dwarfism_recessiv	-1.6856	0	0
1	0.2109	21.089	Dwarfism_recessiv	-1.6849	0	0
1	0.211	21.1	Dwarfism_recessiv	-1.6838	0	0
1	0.2114	21.141	Dwarfism_recessiv	-1.6797	0	0
1	0.2119	21.187	Dwarfism_recessiv	-1.6753	0	0
1	0.2122	21.222	Dwarfism_recessiv	-1.6718	0	0
1	0.213	21.304	Dwarfism_recessiv	-1.6641	0	0
1	0.2131	21.306	Dwarfism_recessiv	-1.6639	0	0
1	0.2133	21.326	Dwarfism_recessiv	-1.662	0	0
1	0.2133	21.328	Dwarfism_recessiv	-1.6618	0	0
1	0.2134	21.34	Dwarfism_recessiv	-1.6607	0	0
1	0.2136	21.357	Dwarfism_recessiv	-1.6591	0	0
1	0.2138	21.376	Dwarfism_recessiv	-1.6574	0	0
1	0.2139	21.393	Dwarfism_recessiv	-1.6558	0	0
1	0.214	21.405	Dwarfism_recessiv	-1.6547	0	0
1	0.2143	21.426	Dwarfism_recessiv	-1.6528	0	0
1	0.2144	21.443	Dwarfism_recessiv	-1.6513	0	0
1	0.2146	21.457	Dwarfism_recessiv	-1.65	0	0
1	0.2148	21.482	Dwarfism_recessiv	-1.6478	0	0
1	0.2155	21.545	Dwarfism_recessiv	-1.6422	0	0
1	0.2164	21.64	Dwarfism_recessiv	-1.634	0	0
1	0.2174	21.744	Dwarfism_recessiv	-1.6253	0	0
1	0.2178	21.78	Dwarfism_recessiv	-1.6223	0	0
1	0.218	21.796	Dwarfism_recessiv	-1.621	0	0
1	0.2181	21.81	Dwarfism_recessiv	-1.6199	0	0
1	0.2183	21.83	Dwarfism_recessiv	-1.6183	0	0
1	0.2184	21.842	Dwarfism_recessiv	-1.6173	0	0
1	0.2189	21.889	Dwarfism_recessiv	-1.6136	0	0
1	0.2191	21.911	Dwarfism_recessiv	-1.6118	0	0
1	0.2193	21.93	Dwarfism_recessiv	-1.6103	0	0
1	0.2193	21.931	Dwarfism_recessiv	-1.6103	0	0
1	0.2194	21.94	Dwarfism_recessiv	-1.6095	0	0
1	0.2195	21.951	Dwarfism_recessiv	-1.6087	0	0
1	0.2197	21.968	Dwarfism_recessiv	-1.6073	0	0
1	0.2197	21.974	Dwarfism_recessiv	-1.6069	0	0
1	0.2198	21.983	Dwarfism_recessiv	-1.6062	0	0
1	0.22	22.003	Dwarfism_recessiv	-1.6046	0	0
1	0.2201	22.007	Dwarfism_recessiv	-1.6044	0	0
1	0.2202	22.019	Dwarfism_recessiv	-1.6035	0	0
1	0.2205	22.047	Dwarfism_recessiv	-1.6013	0	0
1	0.2205	22.051	Dwarfism_recessiv	-1.601	0	0
1	0.2209	22.092	Dwarfism_recessiv	-1.598	0	0
1	0.221	22.099	Dwarfism_recessiv	-1.5974	0	0
1	0.2212	22.115	Dwarfism_recessiv	-1.5962	0	0
1	0.2212	22.119	Dwarfism_recessiv	-1.5959	0	0
1	0.2213	22.133	Dwarfism_recessiv	-1.5949	0	0
1	0.223	22.297	Dwarfism_recessiv	-1.5831	0	0
1	0.2238	22.38	Dwarfism_recessiv	-1.5773	0	0
1	0.2239	22.385	Dwarfism_recessiv	-1.577	0	0
1	0.2246	22.459	Dwarfism_recessiv	-1.572	0	0
1	0.2246	22.464	Dwarfism_recessiv	-1.5716	0	0
1	0.2247	22.47	Dwarfism_recessiv	-1.5713	0	0
1	0.2255	22.551	Dwarfism_recessiv	-1.5659	0	0
1	0.2257	22.568	Dwarfism_recessiv	-1.5648	0	0
1	0.2258	22.577	Dwarfism_recessiv	-1.5642	0	0
1	0.2258	22.581	Dwarfism_recessiv	-1.564	0	0
1	0.2259	22.591	Dwarfism_recessiv	-1.5633	0	0
1	0.2261	22.614	Dwarfism_recessiv	-1.5618	0	0
1	0.2265	22.65	Dwarfism_recessiv	-1.5595	0	0
1	0.2266	22.665	Dwarfism_recessiv	-1.5586	0	0
1	0.2269	22.688	Dwarfism_recessiv	-1.5572	0	0
1	0.2269	22.688	Dwarfism_recessiv	-1.5572	0	0
1	0.227	22.695	Dwarfism_recessiv	-1.5567	0	0
1	0.2272	22.716	Dwarfism_recessiv	-1.5555	0	0
1	0.2272	22.725	Dwarfism_recessiv	-1.5549	0	0
1	0.2279	22.787	Dwarfism_recessiv	-1.5511	0	0
1	0.228	22.801	Dwarfism_recessiv	-1.5503	0	0
1	0.2281	22.81	Dwarfism_recessiv	-1.5497	0	0
1	0.2287	22.866	Dwarfism_recessiv	-1.5464	0	0
1	0.2288	22.879	Dwarfism_recessiv	-1.5456	0	0
1	0.2289	22.895	Dwarfism_recessiv	-1.5447	0	0
1	0.2292	22.923	Dwarfism_recessiv	-1.5431	0	0
1	0.2293	22.933	Dwarfism_recessiv	-1.5425	0	0
1	0.2296	22.96	Dwarfism_recessiv	-1.541	0	0
1	0.2302	23.017	Dwarfism_recessiv	-1.5377	0	0
1	0.2304	23.045	Dwarfism_recessiv	-1.5362	0	0
1	0.2306	23.06	Dwarfism_recessiv	-1.5353	0	0
1	0.2307	23.066	Dwarfism_recessiv	-1.535	0	0
1	0.2308	23.079	Dwarfism_recessiv	-1.5343	0	0
1	0.231	23.1	Dwarfism_recessiv	-1.5331	0	0
1	0.2311	23.109	Dwarfism_recessiv	-1.5327	0	0
1	0.2312	23.124	Dwarfism_recessiv	-1.5319	0	0
1	0.2315	23.147	Dwarfism_recessiv	-1.5306	0	0
1	0.2318	23.184	Dwarfism_recessiv	-1.5287	0	0
1	0.2319	23.19	Dwarfism_recessiv	-1.5284	0	0
1	0.232	23.205	Dwarfism_recessiv	-1.5276	0	0
1	0.2321	23.212	Dwarfism_recessiv	-1.5272	0	0
1	0.2322	23.223	Dwarfism_recessiv	-1.5266	0	0
1	0.2324	23.239	Dwarfism_recessiv	-1.5258	0	0
1	0.2325	23.246	Dwarfism_recessiv	-1.5254	0	0
1	0.2327	23.271	Dwarfism_recessiv	-1.5242	0	0
1	0.2328	23.284	Dwarfism_recessiv	-1.5235	0	0
1	0.2329	23.292	Dwarfism_recessiv	-1.5231	0	0
1	0.233	23.3	Dwarfism_recessiv	-1.5226	0	0
1	0.2331	23.308	Dwarfism_recessiv	-1.5223	0	0
1	0.2337	23.373	Dwarfism_recessiv	-1.519	0	0
1	0.2339	23.389	Dwarfism_recessiv	-1.5182	0	0
1	0.2341	23.411	Dwarfism_recessiv	-1.5171	0	0
1	0.2344	23.436	Dwarfism_recessiv	-1.516	0	0
1	0.2345	23.446	Dwarfism_recessiv	-1.5154	0	0
1	0.2345	23.453	Dwarfism_recessiv	-1.5151	0	0
1	0.2349	23.495	Dwarfism_recessiv	-1.5131	0	0
1	0.235	23.499	Dwarfism_recessiv	-1.5129	0	0
1	0.2351	23.515	Dwarfism_recessiv	-1.5122	0	0
1	0.2356	23.561	Dwarfism_recessiv	-1.5101	0	0
1	0.2358	23.581	Dwarfism_recessiv	-1.5091	0	0
1	0.236	23.595	Dwarfism_recessiv	-1.5085	0	0
1	0.2363	23.635	Dwarfism_recessiv	-1.5067	0	0
1	0.2364	23.642	Dwarfism_recessiv	-1.5064	0	0
1	0.2365	23.652	Dwarfism_recessiv	-1.5059	0	0
1	0.237	23.702	Dwarfism_recessiv	-1.5038	0	0
1	0.2371	23.707	Dwarfism_recessiv	-1.5036	0	0
1	0.2372	23.718	Dwarfism_recessiv	-1.5031	0	0
1	0.2373	23.73	Dwarfism_recessiv	-1.5025	0	0
1	0.2403	24.032	Dwarfism_recessiv	-1.4904	0	0
1	0.2406	24.056	Dwarfism_recessiv	-1.4903	0	0
1	0.2407	24.066	Dwarfism_recessiv	-1.4903	0	0
1	0.2408	24.084	Dwarfism_recessiv	-1.4902	0	0
1	0.2409	24.088	Dwarfism_recessiv	-1.4902	0	0
1	0.2409	24.092	Dwarfism_recessiv	-1.4902	0	0
1	0.2409	24.092	Dwarfism_recessiv	-1.4902	0	0
1	0.2409	24.092	Dwarfism_recessiv	-1.4902	0	0
1	0.2417	24.174	Dwarfism_recessiv	-1.4901	0	0
1	0.2419	24.185	Dwarfism_recessiv	-1.4901	0	0
1	0.2419	24.193	Dwarfism_recessiv	-1.4901	0	0
1	0.2421	24.211	Dwarfism_recessiv	-1.49	0	0
1	0.2422	24.222	Dwarfism_recessiv	-1.49	0	0
1	0.2426	24.257	Dwarfism_recessiv	-1.49	0	0
1	0.2447	24.468	Dwarfism_recessiv	-1.4904	0	0
1	0.2448	24.481	Dwarfism_recessiv	-1.4905	0	0
1	0.2452	24.516	Dwarfism_recessiv	-1.4906	0	0
1	0.246	24.598	Dwarfism_recessiv	-1.491	0	0
1	0.246	24.605	Dwarfism_recessiv	-1.4911	0	0
1	0.2462	24.617	Dwarfism_recessiv	-1.4911	0	0
1	0.2464	24.644	Dwarfism_recessiv	-1.4913	0	0
1	0.2471	24.71	Dwarfism_recessiv	-1.4917	0	0
1	0.2472	24.725	Dwarfism_recessiv	-1.4918	0	0
1	0.2474	24.738	Dwarfism_recessiv	-1.4919	0	0
1	0.2475	24.752	Dwarfism_recessiv	-1.492	0	0
1	0.2476	24.764	Dwarfism_recessiv	-1.4921	0	0
1	0.2491	24.91	Dwarfism_recessiv	-1.4934	0	0
1	0.2491	24.91	Dwarfism_recessiv	-1.4935	0	0
1	0.2492	24.92	Dwarfism_recessiv	-1.4936	0	0
1	0.2493	24.928	Dwarfism_recessiv	-1.4936	0	0
1	0.2493	24.932	Dwarfism_recessiv	-1.4937	0	0
1	0.2498	24.983	Dwarfism_recessiv	-1.4942	0	0
1	0.25	25.004	Dwarfism_recessiv	-1.4945	0	0
1	0.2515	25.15	Dwarfism_recessiv	-1.4964	0	0
1	0.2516	25.161	Dwarfism_recessiv	-1.4965	0	0
1	0.2517	25.17	Dwarfism_recessiv	-1.4966	0	0
1	0.2519	25.194	Dwarfism_recessiv	-1.497	0	0
1	0.2521	25.209	Dwarfism_recessiv	-1.4972	0	0
1	0.2526	25.26	Dwarfism_recessiv	-1.498	0	0
1	0.2527	25.272	Dwarfism_recessiv	-1.4982	0	0
1	0.2528	25.283	Dwarfism_recessiv	-1.4984	0	0
1	0.2531	25.311	Dwarfism_recessiv	-1.4988	0	0
1	0.2539	25.386	Dwarfism_recessiv	-1.5001	0	0
1	0.2539	25.387	Dwarfism_recessiv	-1.5001	0	0
1	0.254	25.401	Dwarfism_recessiv	-1.5004	0	0
1	0.254	25.403	Dwarfism_recessiv	-1.5004	0	0
1	0.2542	25.417	Dwarfism_recessiv	-1.5007	0	0
1	0.2543	25.426	Dwarfism_recessiv	-1.5008	0	0
1	0.2543	25.429	Dwarfism_recessiv	-1.5009	0	0
1	0.2545	25.45	Dwarfism_recessiv	-1.5013	0	0
1	0.2548	25.484	Dwarfism_recessiv	-1.5019	0	0
1	0.2556	25.563	Dwarfism_recessiv	-1.5035	0	0
1	0.2557	25.565	Dwarfism_recessiv	-1.5035	0	0
1	0.2561	25.611	Dwarfism_recessiv	-1.5045	0	0
1	0.2562	25.621	Dwarfism_recessiv	-1.5047	0	0
1	0.2565	25.645	Dwarfism_recessiv	-1.5052	0	0
1	0.2566	25.659	Dwarfism_recessiv	-1.5056	0	0
1	0.2571	25.708	Dwarfism_recessiv	-1.5067	0	0
1	0.2571	25.714	Dwarfism_recessiv	-1.5068	0	0
1	0.2577	25.771	Dwarfism_recessiv	-1.5082	0	0
1	0.258	25.798	Dwarfism_recessiv	-1.5088	0	0
1	0.258	25.801	Dwarfism_recessiv	-1.5089	0	0
1	0.2581	25.81	Dwarfism_recessiv	-1.5091	0	0
1	0.2582	25.821	Dwarfism_recessiv	-1.5094	0	0
1	0.2583	25.831	Dwarfism_recessiv	-1.5096	0	0
1	0.2584	25.838	Dwarfism_recessiv	-1.5098	0	0
1	0.2585	25.852	Dwarfism_recessiv	-1.5102	0	0
1	0.2587	25.87	Dwarfism_recessiv	-1.5106	0	0
1	0.2587	25.875	Dwarfism_recessiv	-1.5108	0	0
1	0.2589	25.89	Dwarfism_recessiv	-1.5111	0	0
1	0.2591	25.912	Dwarfism_recessiv	-1.5117	0	0
1	0.2593	25.931	Dwarfism_recessiv	-1.5123	0	0
1	0.2593	25.933	Dwarfism_recessiv	-1.5123	0	0
1	0.2598	25.979	Dwarfism_recessiv	-1.5136	0	0
1	0.2599	25.993	Dwarfism_recessiv	-1.514	0	0
1	0.2601	26.011	Dwarfism_recessiv	-1.5145	0	0
1	0.2603	26.026	Dwarfism_recessiv	-1.5149	0	0
1	0.2612	26.12	Dwarfism_recessiv	-1.5177	0	0
1	0.2614	26.145	Dwarfism_recessiv	-1.5184	0	0
1	0.2616	26.157	Dwarfism_recessiv	-1.5188	0	0
1	0.2618	26.181	Dwarfism_recessiv	-1.5195	0	0
1	0.2619	26.193	Dwarfism_recessiv	-1.5199	0	0
1	0.2622	26.224	Dwarfism_recessiv	-1.5209	0	0
1	0.2624	26.24	Dwarfism_recessiv	-1.5214	0	0
1	0.2625	26.251	Dwarfism_recessiv	-1.5218	0	0
1	0.2626	26.262	Dwarfism_recessiv	-1.5222	0	0
1	0.2627	26.267	Dwarfism_recessiv	-1.5223	0	0
1	0.2629	26.288	Dwarfism_recessiv	-1.523	0	0
1	0.2629	26.293	Dwarfism_recessiv	-1.5232	0	0
1	0.2631	26.307	Dwarfism_recessiv	-1.5237	0	0
1	0.2631	26.313	Dwarfism_recessiv	-1.5239	0	0
1	0.2633	26.33	Dwarfism_recessiv	-1.5245	0	0
1	0.2638	26.384	Dwarfism_recessiv	-1.5263	0	0
1	0.2644	26.439	Dwarfism_recessiv	-1.5283	0	0
1	0.2646	26.457	Dwarfism_recessiv	-1.529	0	0
1	0.2648	26.483	Dwarfism_recessiv	-1.5299	0	0
1	0.2649	26.486	Dwarfism_recessiv	-1.53	0	0
1	0.2651	26.512	Dwarfism_recessiv	-1.531	0	0
1	0.2651	26.514	Dwarfism_recessiv	-1.5311	0	0
1	0.2652	26.516	Dwarfism_recessiv	-1.5312	0	0
1	0.2655	26.547	Dwarfism_recessiv	-1.5323	0	0
1	0.266	26.6	Dwarfism_recessiv	-1.5344	0	0
1	0.2663	26.63	Dwarfism_recessiv	-1.5356	0	0
1	0.2665	26.647	Dwarfism_recessiv	-1.5363	0	0
1	0.2667	26.672	Dwarfism_recessiv	-1.5374	0	0
1	0.2673	26.726	Dwarfism_recessiv	-1.5396	0	0
1	0.2675	26.747	Dwarfism_recessiv	-1.5405	0	0
1	0.2676	26.764	Dwarfism_recessiv	-1.5412	0	0
1	0.268	26.803	Dwarfism_recessiv	-1.5429	0	0
1	0.2681	26.814	Dwarfism_recessiv	-1.5434	0	0
1	0.2682	26.815	Dwarfism_recessiv	-1.5435	0	0
1	0.2684	26.838	Dwarfism_recessiv	-1.5445	0	0
1	0.2684	26.84	Dwarfism_recessiv	-1.5445	0	0
1	0.2685	26.854	Dwarfism_recessiv	-1.5452	0	0
1	0.2686	26.862	Dwarfism_recessiv	-1.5455	0	0
1	0.2686	26.863	Dwarfism_recessiv	-1.5456	0	0
1	0.2688	26.876	Dwarfism_recessiv	-1.5462	0	0
1	0.2688	26.876	Dwarfism_recessiv	-1.5462	0	0
1	0.2688	26.882	Dwarfism_recessiv	-1.5465	0	0
1	0.2688	26.885	Dwarfism_recessiv	-1.5466	0	0
1	0.269	26.901	Dwarfism_recessiv	-1.5473	0	0
1	0.2695	26.946	Dwarfism_recessiv	-1.5494	0	0
1	0.2695	26.949	Dwarfism_recessiv	-1.5496	0	0
1	0.2696	26.956	Dwarfism_recessiv	-1.5499	0	0
1	0.2696	26.956	Dwarfism_recessiv	-1.5499	0	0
1	0.2697	26.974	Dwarfism_recessiv	-1.5508	0	0
1	0.2699	26.989	Dwarfism_recessiv	-1.5515	0	0
1	0.27	26.999	Dwarfism_recessiv	-1.552	0	0
1	0.2711	27.109	Dwarfism_recessiv	-1.5574	0	0
1	0.2719	27.19	Dwarfism_recessiv	-1.5616	0	0
1	0.2721	27.21	Dwarfism_recessiv	-1.5627	0	0
1	0.2733	27.326	Dwarfism_recessiv	-1.5691	0	0
1	0.2733	27.333	Dwarfism_recessiv	-1.5694	0	0
1	0.2735	27.351	Dwarfism_recessiv	-1.5705	0	0
1	0.2736	27.357	Dwarfism_recessiv	-1.5708	0	0
1	0.2737	27.367	Dwarfism_recessiv	-1.5714	0	0
1	0.2739	27.388	Dwarfism_recessiv	-1.5726	0	0
1	0.2739	27.394	Dwarfism_recessiv	-1.5729	0	0
1	0.2743	27.43	Dwarfism_recessiv	-1.575	0	0
1	0.2746	27.458	Dwarfism_recessiv	-1.5767	0	0
1	0.2747	27.474	Dwarfism_recessiv	-1.5777	0	0
1	0.2749	27.49	Dwarfism_recessiv	-1.5787	0	0
1	0.2751	27.506	Dwarfism_recessiv	-1.5796	0	0
1	0.2752	27.517	Dwarfism_recessiv	-1.5803	0	0
1	0.2754	27.542	Dwarfism_recessiv	-1.5819	0	0
1	0.2756	27.559	Dwarfism_recessiv	-1.5829	0	0
1	0.2756	27.564	Dwarfism_recessiv	-1.5832	0	0
1	0.2757	27.574	Dwarfism_recessiv	-1.5838	0	0
1	0.276	27.597	Dwarfism_recessiv	-1.5853	0	0
1	0.2762	27.616	Dwarfism_recessiv	-1.5865	0	0
1	0.2762	27.621	Dwarfism_recessiv	-1.5868	0	0
1	0.2766	27.659	Dwarfism_recessiv	-1.5893	0	0
1	0.2767	27.67	Dwarfism_recessiv	-1.59	0	0
1	0.2767	27.67	Dwarfism_recessiv	-1.59	0	0
1	0.2767	27.671	Dwarfism_recessiv	-1.5901	0	0
1	0.2767	27.671	Dwarfism_recessiv	-1.5901	0	0
1	0.2767	27.672	Dwarfism_recessiv	-1.5901	0	0
1	0.2767	27.672	Dwarfism_recessiv	-1.5902	0	0
1	0.2767	27.673	Dwarfism_recessiv	-1.5902	0	0
1	0.2768	27.683	Dwarfism_recessiv	-1.5909	0	0
1	0.277	27.699	Dwarfism_recessiv	-1.5919	0	0
1	0.277	27.703	Dwarfism_recessiv	-1.5922	0	0
1	0.277	27.704	Dwarfism_recessiv	-1.5923	0	0
1	0.2771	27.707	Dwarfism_recessiv	-1.5925	0	0
1	0.2772	27.723	Dwarfism_recessiv	-1.5935	0	0
1	0.278	27.803	Dwarfism_recessiv	-1.599	0	0
1	0.2782	27.819	Dwarfism_recessiv	-1.6002	0	0
1	0.2784	27.843	Dwarfism_recessiv	-1.6019	0	0
1	0.2786	27.86	Dwarfism_recessiv	-1.6031	0	0
1	0.2795	27.945	Dwarfism_recessiv	-1.6093	0	0
1	0.2796	27.963	Dwarfism_recessiv	-1.6106	0	0
1	0.2797	27.968	Dwarfism_recessiv	-1.611	0	0
1	0.2799	27.988	Dwarfism_recessiv	-1.6125	0	0
1	0.2799	27.992	Dwarfism_recessiv	-1.6128	0	0
1	0.2803	28.033	Dwarfism_recessiv	-1.6159	0	0
1	0.2807	28.07	Dwarfism_recessiv	-1.6188	0	0
1	0.2809	28.086	Dwarfism_recessiv	-1.6201	0	0
1	0.2809	28.092	Dwarfism_recessiv	-1.6206	0	0
1	0.2811	28.113	Dwarfism_recessiv	-1.6223	0	0
1	0.2812	28.117	Dwarfism_recessiv	-1.6225	0	0
1	0.2814	28.142	Dwarfism_recessiv	-1.6246	0	0
1	0.2817	28.167	Dwarfism_recessiv	-1.6266	0	0
1	0.2817	28.172	Dwarfism_recessiv	-1.6271	0	0
1	0.2818	28.183	Dwarfism_recessiv	-1.6279	0	0
1	0.2819	28.191	Dwarfism_recessiv	-1.6286	0	0
1	0.2819	28.192	Dwarfism_recessiv	-1.6287	0	0
1	0.282	28.198	Dwarfism_recessiv	-1.6292	0	0
1	0.2825	28.249	Dwarfism_recessiv	-1.6335	0	0
1	0.2847	28.468	Dwarfism_recessiv	-1.6531	0	0
1	0.285	28.496	Dwarfism_recessiv	-1.6558	0	0
1	0.2851	28.509	Dwarfism_recessiv	-1.657	0	0
1	0.2852	28.522	Dwarfism_recessiv	-1.6582	0	0
1	0.2855	28.55	Dwarfism_recessiv	-1.661	0	0
1	0.2856	28.563	Dwarfism_recessiv	-1.6622	0	0
1	0.2858	28.578	Dwarfism_recessiv	-1.6638	0	0
1	0.2858	28.579	Dwarfism_recessiv	-1.6638	0	0
1	0.2863	28.632	Dwarfism_recessiv	-1.6692	0	0
1	0.2867	28.667	Dwarfism_recessiv	-1.6728	0	0
1	0.287	28.696	Dwarfism_recessiv	-1.6757	0	0
1	0.287	28.699	Dwarfism_recessiv	-1.6761	0	0
1	0.2871	28.713	Dwarfism_recessiv	-1.6776	0	0
1	0.2873	28.728	Dwarfism_recessiv	-1.6792	0	0
1	0.2874	28.74	Dwarfism_recessiv	-1.6805	0	0
1	0.2875	28.749	Dwarfism_recessiv	-1.6814	0	0
1	0.2876	28.762	Dwarfism_recessiv	-1.6828	0	0
1	0.2878	28.785	Dwarfism_recessiv	-1.6852	0	0
1	0.2892	28.922	Dwarfism_recessiv	-1.7007	0	0
1	0.2893	28.933	Dwarfism_recessiv	-1.702	0	0
1	0.2893	28.933	Dwarfism_recessiv	-1.7021	0	0
1	0.2893	28.934	Dwarfism_recessiv	-1.7021	0	0
1	0.2895	28.946	Dwarfism_recessiv	-1.7035	0	0
1	0.2897	28.965	Dwarfism_recessiv	-1.7058	0	0
1	0.2898	28.977	Dwarfism_recessiv	-1.7072	0	0
1	0.2901	29.013	Dwarfism_recessiv	-1.7116	0	0
1	0.2903	29.034	Dwarfism_recessiv	-1.7141	0	0
1	0.2904	29.039	Dwarfism_recessiv	-1.7148	0	0
1	0.2905	29.047	Dwarfism_recessiv	-1.7158	0	0
1	0.2906	29.059	Dwarfism_recessiv	-1.7173	0	0
1	0.2907	29.072	Dwarfism_recessiv	-1.7188	0	0
1	0.2908	29.078	Dwarfism_recessiv	-1.7196	0	0
1	0.2908	29.083	Dwarfism_recessiv	-1.7202	0	0
1	0.2909	29.092	Dwarfism_recessiv	-1.7214	0	0
1	0.2911	29.106	Dwarfism_recessiv	-1.7232	0	0
1	0.2911	29.107	Dwarfism_recessiv	-1.7233	0	0
1	0.2911	29.107	Dwarfism_recessiv	-1.7234	0	0
1	0.2911	29.107	Dwarfism_recessiv	-1.7234	0	0
1	0.2911	29.108	Dwarfism_recessiv	-1.7234	0	0
1	0.2911	29.113	Dwarfism_recessiv	-1.7241	0	0
1	0.2921	29.214	Dwarfism_recessiv	-1.7375	0	0
1	0.2922	29.22	Dwarfism_recessiv	-1.7382	0	0
1	0.2924	29.24	Dwarfism_recessiv	-1.741	0	0
1	0.2925	29.25	Dwarfism_recessiv	-1.7424	0	0
1	0.2931	29.311	Dwarfism_recessiv	-1.751	0	0
1	0.2942	29.42	Dwarfism_recessiv	-1.7669	0	0
1	0.2946	29.457	Dwarfism_recessiv	-1.7727	0	0
1	0.3001	30.007	Dwarfism_recessiv	-1.8729	0	0
1	0.3001	30.011	Dwarfism_recessiv	-1.8738	0	0
1	0.3002	30.021	Dwarfism_recessiv	-1.8759	0	0
1	0.3003	30.031	Dwarfism_recessiv	-1.8782	0	0
1	0.3004	30.043	Dwarfism_recessiv	-1.8808	0	0
1	0.301	30.1	Dwarfism_recessiv	-1.8936	0	0
1	0.3012	30.116	Dwarfism_recessiv	-1.8973	0	0
1	0.3013	30.132	Dwarfism_recessiv	-1.901	0	0
1	0.3014	30.135	Dwarfism_recessiv	-1.9017	0	0
1	0.3021	30.212	Dwarfism_recessiv	-1.9204	0	0
1	0.3023	30.232	Dwarfism_recessiv	-1.9252	0	0
1	0.3024	30.241	Dwarfism_recessiv	-1.9275	0	0
1	0.3025	30.255	Dwarfism_recessiv	-1.9311	0	0
1	0.303	30.299	Dwarfism_recessiv	-1.9427	0	0
1	0.3031	30.308	Dwarfism_recessiv	-1.9452	0	0
1	0.3032	30.32	Dwarfism_recessiv	-1.9484	0	0
1	0.3037	30.373	Dwarfism_recessiv	-1.963	0	0
1	0.3039	30.386	Dwarfism_recessiv	-1.9667	0	0
1	0.3039	30.391	Dwarfism_recessiv	-1.9681	0	0
1	0.304	30.4	Dwarfism_recessiv	-1.9706	0	0
1	0.3073	30.727	Dwarfism_recessiv	-2.0802	0	0
1	0.3074	30.737	Dwarfism_recessiv	-2.084	0	0
1	0.3074	30.739	Dwarfism_recessiv	-2.0848	0	0
1	0.3074	30.739	Dwarfism_recessiv	-2.085	0	0
1	0.3075	30.747	Dwarfism_recessiv	-2.0879	0	0
1	0.3075	30.748	Dwarfism_recessiv	-2.0884	0	0
1	0.3075	30.748	Dwarfism_recessiv	-2.0885	0	0
1	0.3075	30.75	Dwarfism_recessiv	-2.0891	0	0
1	0.3076	30.764	Dwarfism_recessiv	-2.0947	0	0
1	0.3078	30.776	Dwarfism_recessiv	-2.0996	0	0
1	0.3079	30.788	Dwarfism_recessiv	-2.1046	0	0
1	0.3079	30.788	Dwarfism_recessiv	-2.1047	0	0
1	0.308	30.796	Dwarfism_recessiv	-2.1079	0	0
1	0.308	30.802	Dwarfism_recessiv	-2.1106	0	0
1	0.3082	30.821	Dwarfism_recessiv	-2.1188	0	0
1	0.3082	30.825	Dwarfism_recessiv	-2.1204	0	0
1	0.3084	30.836	Dwarfism_recessiv	-2.1253	0	0
1	0.3085	30.848	Dwarfism_recessiv	-2.1307	0	0
1	0.3086	30.859	Dwarfism_recessiv	-2.1354	0	0
1	0.3086	30.86	Dwarfism_recessiv	-2.1359	0	0
1	0.3088	30.881	Dwarfism_recessiv	-2.1457	0	0
1	0.3089	30.885	Dwarfism_recessiv	-2.1477	0	0
1	0.3092	30.917	Dwarfism_recessiv	-2.1627	0	0
1	0.3097	30.972	Dwarfism_recessiv	-2.1905	0	0
1	0.3102	31.024	Dwarfism_recessiv	-2.2189	0	0
1	0.3104	31.038	Dwarfism_recessiv	-2.2269	0	0
1	0.3104	31.043	Dwarfism_recessiv	-2.2298	0	0
1	0.3106	31.064	Dwarfism_recessiv	-2.2421	0	0
1	0.3107	31.072	Dwarfism_recessiv	-2.2471	0	0
1	0.3109	31.094	Dwarfism_recessiv	-2.2605	0	0
1	0.311	31.105	Dwarfism_recessiv	-2.2672	0	0
1	0.3111	31.113	Dwarfism_recessiv	-2.2726	0	0
1	0.3112	31.124	Dwarfism_recessiv	-2.28	0	0
1	0.3124	31.241	Dwarfism_recessiv	-2.3656	0	0
1	0.3127	31.267	Dwarfism_recessiv	-2.3869	0	0
1	0.3129	31.29	Dwarfism_recessiv	-2.4069	0	0
1	0.3134	31.34	Dwarfism_recessiv	-2.4554	0	0
1	0.3136	31.357	Dwarfism_recessiv	-2.4731	0	0
1	0.3136	31.364	Dwarfism_recessiv	-2.48	0	0
1	0.3138	31.383	Dwarfism_recessiv	-2.5011	0	0
1	0.3139	31.393	Dwarfism_recessiv	-2.5127	0	0
1	0.3157	31.565	Dwarfism_recessiv	-2.7883	0	0
1	0.3158	31.585	Dwarfism_recessiv	-2.7878	0	0
1	0.316	31.596	Dwarfism_recessiv	-2.7876	0	0
1	0.3161	31.609	Dwarfism_recessiv	-2.7874	0	0
1	0.317	31.695	Dwarfism_recessiv	-2.7874	0	0
1	0.3174	31.742	Dwarfism_recessiv	-2.7883	0	0
1	0.3175	31.749	Dwarfism_recessiv	-2.7883	0	0
1	0.3176	31.761	Dwarfism_recessiv	-2.7883	0	0
1	0.3179	31.786	Dwarfism_recessiv	-2.7883	0	0
1	0.318	31.796	Dwarfism_recessiv	-2.7882	0	0
1	0.3187	31.867	Dwarfism_recessiv	-2.7883	0	0
1	0.3189	31.894	Dwarfism_recessiv	-2.7878	0	0
1	0.3191	31.915	Dwarfism_recessiv	-2.7876	0	0
1	0.3201	32.012	Dwarfism_recessiv	-2.7883	0	0
1	0.3202	32.022	Dwarfism_recessiv	-2.7883	0	0
1	0.3205	32.054	Dwarfism_recessiv	-2.7883	0	0
1	0.3206	32.06	Dwarfism_recessiv	-2.7883	0	0
1	0.3213	32.132	Dwarfism_recessiv	-2.7883	0	0
1	0.3215	32.149	Dwarfism_recessiv	-2.7882	0	0
1	0.3221	32.208	Dwarfism_recessiv	-2.7883	0	0
1	0.3223	32.233	Dwarfism_recessiv	-2.7883	0	0
1	0.3227	32.273	Dwarfism_recessiv	-2.7883	0	0
1	0.3228	32.277	Dwarfism_recessiv	-2.7883	0	0
1	0.3229	32.29	Dwarfism_recessiv	-2.7882	0	0
1	0.323	32.3	Dwarfism_recessiv	-2.7881	0	0
1	0.3231	32.315	Dwarfism_recessiv	-2.7881	0	0
1	0.3233	32.331	Dwarfism_recessiv	-2.7882	0	0
1	0.3233	32.333	Dwarfism_recessiv	-2.7882	0	0
1	0.3235	32.349	Dwarfism_recessiv	-2.7883	0	0
1	0.3236	32.355	Dwarfism_recessiv	-2.7883	0	0
1	0.3237	32.372	Dwarfism_recessiv	-2.7882	0	0
1	0.3238	32.378	Dwarfism_recessiv	-2.7882	0	0
1	0.324	32.397	Dwarfism_recessiv	-2.7883	0	0
1	0.324	32.401	Dwarfism_recessiv	-2.7882	0	0
1	0.3241	32.412	Dwarfism_recessiv	-2.788	0	0
1	0.3243	32.429	Dwarfism_recessiv	-2.7878	0	0
1	0.3245	32.452	Dwarfism_recessiv	-2.7876	0	0
1	0.3247	32.466	Dwarfism_recessiv	-2.7875	0	0
1	0.3247	32.471	Dwarfism_recessiv	-2.7875	0	0
1	0.3248	32.481	Dwarfism_recessiv	-2.7876	0	0
1	0.325	32.495	Dwarfism_recessiv	-2.7876	0	0
1	0.3251	32.511	Dwarfism_recessiv	-2.7878	0	0
1	0.3254	32.539	Dwarfism_recessiv	-2.7883	0	0
1	0.3256	32.558	Dwarfism_recessiv	-2.7883	0	0
1	0.3257	32.569	Dwarfism_recessiv	-2.7883	0	0
1	0.3261	32.613	Dwarfism_recessiv	-2.7883	0	0
1	0.3262	32.623	Dwarfism_recessiv	-2.7881	0	0
1	0.3263	32.632	Dwarfism_recessiv	-2.788	0	0
1	0.3265	32.653	Dwarfism_recessiv	-2.7877	0	0
1	0.3266	32.664	Dwarfism_recessiv	-2.7876	0	0
1	0.3267	32.674	Dwarfism_recessiv	-2.7876	0	0
1	0.327	32.696	Dwarfism_recessiv	-2.7876	0	0
1	0.3271	32.71	Dwarfism_recessiv	-2.7876	0	0
1	0.3273	32.728	Dwarfism_recessiv	-2.7878	0	0
1	0.3276	32.755	Dwarfism_recessiv	-2.7883	0	0
1	0.3277	32.768	Dwarfism_recessiv	-2.7883	0	0
1	0.3277	32.771	Dwarfism_recessiv	-2.7883	0	0
1	0.3278	32.782	Dwarfism_recessiv	-2.7882	0	0
1	0.328	32.804	Dwarfism_recessiv	-2.7882	0	0
1	0.3282	32.822	Dwarfism_recessiv	-2.7883	0	0
1	0.3285	32.854	Dwarfism_recessiv	-2.788	0	0
1	0.3292	32.923	Dwarfism_recessiv	-2.7883	0	0
1	0.3294	32.941	Dwarfism_recessiv	-2.7883	0	0
1	0.3297	32.973	Dwarfism_recessiv	-2.7883	0	0
1	0.3299	32.985	Dwarfism_recessiv	-2.7883	0	0
1	0.3301	33.009	Dwarfism_recessiv	-2.7883	0	0
1	0.3301	33.012	Dwarfism_recessiv	-2.7883	0	0
1	0.3302	33.024	Dwarfism_recessiv	-2.7883	0	0
1	0.3304	33.044	Dwarfism_recessiv	-2.7883	0	0
1	0.3305	33.05	Dwarfism_recessiv	-2.7883	0	0
1	0.3306	33.059	Dwarfism_recessiv	-2.7883	0	0
1	0.3308	33.076	Dwarfism_recessiv	-2.7879	0	0
1	0.3308	33.081	Dwarfism_recessiv	-2.7878	0	0
1	0.3317	33.169	Dwarfism_recessiv	-2.7874	0	0
1	0.3319	33.192	Dwarfism_recessiv	-2.7877	0	0
1	0.3321	33.212	Dwarfism_recessiv	-2.7881	0	0
1	0.3322	33.22	Dwarfism_recessiv	-2.7883	0	0
1	0.3323	33.233	Dwarfism_recessiv	-2.7883	0	0
1	0.3324	33.241	Dwarfism_recessiv	-2.7883	0	0
1	0.3326	33.258	Dwarfism_recessiv	-2.7883	0	0
1	0.3326	33.263	Dwarfism_recessiv	-2.7883	0	0
1	0.3328	33.284	Dwarfism_recessiv	-2.7883	0	0
1	0.3329	33.286	Dwarfism_recessiv	-2.7883	0	0
1	0.333	33.303	Dwarfism_recessiv	-2.7883	0	0
1	0.3332	33.32	Dwarfism_recessiv	-2.7882	0	0
1	0.3334	33.342	Dwarfism_recessiv	-2.7883	0	0
1	0.3335	33.349	Dwarfism_recessiv	-2.7883	0	0
1	0.3336	33.364	Dwarfism_recessiv	-2.7883	0	0
1	0.3337	33.371	Dwarfism_recessiv	-2.7882	0	0
1	0.3338	33.377	Dwarfism_recessiv	-2.7881	0	0
1	0.3339	33.391	Dwarfism_recessiv	-2.7879	0	0
1	0.334	33.403	Dwarfism_recessiv	-2.7877	0	0
1	0.3343	33.427	Dwarfism_recessiv	-2.7876	0	0
1	0.3343	33.428	Dwarfism_recessiv	-2.7876	0	0
1	0.3345	33.45	Dwarfism_recessiv	-2.7877	0	0
1	0.3346	33.459	Dwarfism_recessiv	-2.7877	0	0
1	0.3349	33.485	Dwarfism_recessiv	-2.788	0	0
1	0.335	33.5	Dwarfism_recessiv	-2.7883	0	0
1	0.3353	33.525	Dwarfism_recessiv	-2.7883	0	0
1	0.3354	33.536	Dwarfism_recessiv	-2.7883	0	0
1	0.3356	33.561	Dwarfism_recessiv	-2.7879	0	0
1	0.3357	33.574	Dwarfism_recessiv	-2.7878	0	0
1	0.3358	33.584	Dwarfism_recessiv	-2.7877	0	0
1	0.3363	33.627	Dwarfism_recessiv	-2.7878	0	0
1	0.3363	33.633	Dwarfism_recessiv	-2.7878	0	0
1	0.3367	33.667	Dwarfism_recessiv	-2.7883	0	0
1	0.3369	33.691	Dwarfism_recessiv	-2.7882	0	0
1	0.3371	33.708	Dwarfism_recessiv	-2.7882	0	0
1	0.3371	33.714	Dwarfism_recessiv	-2.7882	0	0
1	0.3373	33.726	Dwarfism_recessiv	-2.7883	0	0
1	0.3374	33.736	Dwarfism_recessiv	-2.7883	0	0
1	0.3375	33.749	Dwarfism_recessiv	-2.7883	0	0
1	0.3376	33.759	Dwarfism_recessiv	-2.7883	0	0
1	0.3377	33.773	Dwarfism_recessiv	-2.7883	0	0
1	0.3377	33.774	Dwarfism_recessiv	-2.7883	0	0
1	0.3378	33.776	Dwarfism_recessiv	-2.7883	0	0
1	0.3378	33.777	Dwarfism_recessiv	-2.7883	0	0
1	0.3378	33.784	Dwarfism_recessiv	-2.7883	0	0
1	0.3379	33.79	Dwarfism_recessiv	-2.7883	0	0
1	0.3379	33.791	Dwarfism_recessiv	-2.7883	0	0
1	0.338	33.803	Dwarfism_recessiv	-2.7883	0	0
1	0.338	33.803	Dwarfism_recessiv	-2.7883	0	0
1	0.3381	33.806	Dwarfism_recessiv	-2.7883	0	0
1	0.3382	33.816	Dwarfism_recessiv	-2.7883	0	0
1	0.3383	33.831	Dwarfism_recessiv	-2.7883	0	0
1	0.3384	33.841	Dwarfism_recessiv	-2.7883	0	0
1	0.3386	33.858	Dwarfism_recessiv	-2.7883	0	0
1	0.3386	33.862	Dwarfism_recessiv	-2.7883	0	0
1	0.3387	33.874	Dwarfism_recessiv	-2.7883	0	0
1	0.339	33.896	Dwarfism_recessiv	-2.7883	0	0
1	0.339	33.899	Dwarfism_recessiv	-2.7883	0	0
1	0.3391	33.91	Dwarfism_recessiv	-2.7883	0	0
1	0.3392	33.921	Dwarfism_recessiv	-2.7883	0	0
1	0.3394	33.943	Dwarfism_recessiv	-2.7883	0	0
1	0.3395	33.953	Dwarfism_recessiv	-2.7883	0	0
1	0.3397	33.968	Dwarfism_recessiv	-2.7883	0	0
1	0.3397	33.975	Dwarfism_recessiv	-2.7883	0	0
1	0.3398	33.976	Dwarfism_recessiv	-2.7883	0	0
1	0.3402	34.019	Dwarfism_recessiv	-2.7883	0	0
1	0.3402	34.024	Dwarfism_recessiv	-2.7883	0	0
1	0.3403	34.033	Dwarfism_recessiv	-2.7883	0	0
1	0.3405	34.048	Dwarfism_recessiv	-2.7883	0	0
1	0.3408	34.081	Dwarfism_recessiv	-2.7883	0	0
1	0.3413	34.128	Dwarfism_recessiv	-2.7883	0	0
1	0.3418	34.179	Dwarfism_recessiv	-2.7883	0	0
1	0.3419	34.194	Dwarfism_recessiv	-2.7883	0	0
1	0.342	34.201	Dwarfism_recessiv	-2.7883	0	0
1	0.343	34.296	Dwarfism_recessiv	-2.7883	0	0
1	0.3434	34.34	Dwarfism_recessiv	-2.7883	0	0
1	0.3434	34.345	Dwarfism_recessiv	-2.7883	0	0
1	0.3436	34.361	Dwarfism_recessiv	-2.7883	0	0
1	0.3438	34.384	Dwarfism_recessiv	-2.7883	0	0
1	0.3441	34.408	Dwarfism_recessiv	-2.7883	0	0
1	0.3449	34.493	Dwarfism_recessiv	-2.7883	0	0
1	0.3449	34.493	Dwarfism_recessiv	-2.7883	0	0
1	0.3459	34.594	Dwarfism_recessiv	-2.7883	0	0
1	0.346	34.599	Dwarfism_recessiv	-2.7883	0	0
1	0.3469	34.694	Dwarfism_recessiv	-2.7883	0	0
1	0.3471	34.707	Dwarfism_recessiv	-2.7883	0	0
1	0.3472	34.718	Dwarfism_recessiv	-2.7883	0	0
1	0.3473	34.727	Dwarfism_recessiv	-2.7883	0	0
1	0.3474	34.737	Dwarfism_recessiv	-2.7883	0	0
1	0.3476	34.756	Dwarfism_recessiv	-2.7883	0	0
1	0.3477	34.768	Dwarfism_recessiv	-2.7883	0	0
1	0.3477	34.77	Dwarfism_recessiv	-2.7883	0	0
1	0.3479	34.792	Dwarfism_recessiv	-2.7883	0	0
1	0.3481	34.813	Dwarfism_recessiv	-2.7883	0	0
1	0.3482	34.823	Dwarfism_recessiv	-2.7883	0	0
1	0.3483	34.827	Dwarfism_recessiv	-2.7883	0	0
1	0.3485	34.85	Dwarfism_recessiv	-2.7883	0	0
1	0.3487	34.869	Dwarfism_recessiv	-2.7883	0	0
1	0.3489	34.886	Dwarfism_recessiv	-2.7883	0	0
1	0.3491	34.908	Dwarfism_recessiv	-2.7883	0	0
1	0.3499	34.991	Dwarfism_recessiv	-2.7883	0	0
1	0.3508	35.085	Dwarfism_recessiv	-2.7883	0	0
1	0.3509	35.092	Dwarfism_recessiv	-2.7883	0	0
1	0.3517	35.172	Dwarfism_recessiv	-2.7883	0	0
1	0.3518	35.181	Dwarfism_recessiv	-2.7883	0	0
1	0.3518	35.182	Dwarfism_recessiv	-2.7883	0	0
1	0.3518	35.182	Dwarfism_recessiv	-2.7883	0	0
1	0.3519	35.192	Dwarfism_recessiv	-2.7883	0	0
1	0.352	35.198	Dwarfism_recessiv	-2.7883	0	0
1	0.3521	35.21	Dwarfism_recessiv	-2.7883	0	0
1	0.3522	35.221	Dwarfism_recessiv	-2.7883	0	0
1	0.3526	35.256	Dwarfism_recessiv	-2.7883	0	0
1	0.3539	35.388	Dwarfism_recessiv	-2.7883	0	0
1	0.354	35.405	Dwarfism_recessiv	-2.7883	0	0
1	0.3541	35.414	Dwarfism_recessiv	-2.7883	0	0
1	0.3543	35.427	Dwarfism_recessiv	-2.7883	0	0
1	0.3544	35.438	Dwarfism_recessiv	-2.7883	0	0
1	0.3545	35.453	Dwarfism_recessiv	-2.7883	0	0
1	0.3547	35.472	Dwarfism_recessiv	-2.7883	0	0
1	0.3549	35.488	Dwarfism_recessiv	-2.7883	0	0
1	0.355	35.502	Dwarfism_recessiv	-2.7883	0	0
1	0.3551	35.512	Dwarfism_recessiv	-2.7883	0	0
1	0.3557	35.575	Dwarfism_recessiv	-2.7883	0	0
1	0.3561	35.613	Dwarfism_recessiv	-2.7883	0	0
1	0.3562	35.623	Dwarfism_recessiv	-2.7883	0	0
1	0.3563	35.633	Dwarfism_recessiv	-2.7883	0	0
1	0.3565	35.648	Dwarfism_recessiv	-2.7882	0	0
1	0.3567	35.668	Dwarfism_recessiv	-2.7883	0	0
1	0.357	35.701	Dwarfism_recessiv	-2.7883	0	0
1	0.3571	35.705	Dwarfism_recessiv	-2.7883	0	0
1	0.3571	35.714	Dwarfism_recessiv	-2.7883	0	0
1	0.3572	35.722	Dwarfism_recessiv	-2.7883	0	0
1	0.3583	35.835	Dwarfism_recessiv	-2.7883	0	0
1	0.3585	35.845	Dwarfism_recessiv	-2.7883	0	0
1	0.3586	35.857	Dwarfism_recessiv	-2.7883	0	0
1	0.3586	35.859	Dwarfism_recessiv	-2.7883	0	0
1	0.3588	35.877	Dwarfism_recessiv	-2.7883	0	0
1	0.359	35.897	Dwarfism_recessiv	-2.7883	0	0
1	0.3591	35.911	Dwarfism_recessiv	-2.7883	0	0
1	0.3598	35.979	Dwarfism_recessiv	-2.7883	0	0
1	0.3598	35.979	Dwarfism_recessiv	-2.7883	0	0
1	0.3599	35.994	Dwarfism_recessiv	-2.7883	0	0
1	0.36	36.001	Dwarfism_recessiv	-2.7883	0	0
1	0.3602	36.016	Dwarfism_recessiv	-2.7883	0	0
1	0.3607	36.069	Dwarfism_recessiv	-2.7883	0	0
1	0.3609	36.086	Dwarfism_recessiv	-2.7883	0	0
1	0.3609	36.094	Dwarfism_recessiv	-2.7883	0	0
1	0.3611	36.107	Dwarfism_recessiv	-2.7882	0	0
1	0.3612	36.12	Dwarfism_recessiv	-2.7882	0	0
1	0.3613	36.129	Dwarfism_recessiv	-2.7883	0	0
1	0.3614	36.141	Dwarfism_recessiv	-2.7883	0	0
1	0.3615	36.153	Dwarfism_recessiv	-2.7883	0	0
1	0.3617	36.167	Dwarfism_recessiv	-2.7882	0	0
1	0.362	36.201	Dwarfism_recessiv	-2.7882	0	0
1	0.3621	36.215	Dwarfism_recessiv	-2.7883	0	0
1	0.3622	36.225	Dwarfism_recessiv	-2.7883	0	0
1	0.3628	36.281	Dwarfism_recessiv	-2.7883	0	0
1	0.3629	36.289	Dwarfism_recessiv	-2.7883	0	0
1	0.363	36.303	Dwarfism_recessiv	-2.7883	0	0
1	0.3631	36.313	Dwarfism_recessiv	-2.7883	0	0
1	0.3642	36.423	Dwarfism_recessiv	-2.7878	0	0
1	0.3643	36.429	Dwarfism_recessiv	-2.7879	0	0
1	0.3645	36.455	Dwarfism_recessiv	-2.7883	0	0
1	0.3646	36.464	Dwarfism_recessiv	-2.7883	0	0
1	0.3646	36.464	Dwarfism_recessiv	-2.7883	0	0
1	0.3649	36.488	Dwarfism_recessiv	-2.7883	0	0
1	0.365	36.504	Dwarfism_recessiv	-2.7883	0	0
1	0.3651	36.512	Dwarfism_recessiv	-2.7883	0	0
1	0.3654	36.538	Dwarfism_recessiv	-2.7883	0	0
1	0.3657	36.572	Dwarfism_recessiv	-2.7883	0	0
1	0.3658	36.578	Dwarfism_recessiv	-2.7883	0	0
1	0.366	36.604	Dwarfism_recessiv	-2.7883	0	0
1	0.3661	36.611	Dwarfism_recessiv	-2.7883	0	0
1	0.3662	36.622	Dwarfism_recessiv	-2.7883	0	0
1	0.3664	36.644	Dwarfism_recessiv	-2.7883	0	0
1	0.3666	36.658	Dwarfism_recessiv	-2.7883	0	0
1	0.3667	36.674	Dwarfism_recessiv	-2.7883	0	0
1	0.3669	36.686	Dwarfism_recessiv	-2.7883	0	0
1	0.3669	36.693	Dwarfism_recessiv	-2.7883	0	0
1	0.3675	36.746	Dwarfism_recessiv	-2.788	0	0
1	0.3675	36.748	Dwarfism_recessiv	-2.788	0	0
1	0.3679	36.787	Dwarfism_recessiv	-2.7883	0	0
1	0.368	36.804	Dwarfism_recessiv	-2.7883	0	0
1	0.3681	36.81	Dwarfism_recessiv	-2.7883	0	0
1	0.3682	36.817	Dwarfism_recessiv	-2.7883	0	0
1	0.3685	36.851	Dwarfism_recessiv	-2.7883	0	0
1	0.3685	36.853	Dwarfism_recessiv	-2.7883	0	0
1	0.3687	36.87	Dwarfism_recessiv	-2.7883	0	0
1	0.3687	36.873	Dwarfism_recessiv	-2.7883	0	0
1	0.3688	36.878	Dwarfism_recessiv	-2.7883	0	0
1	0.369	36.896	Dwarfism_recessiv	-2.7883	0	0
1	0.3697	36.971	Dwarfism_recessiv	-2.7883	0	0
1	0.3699	36.987	Dwarfism_recessiv	-2.7883	0	0
1	0.3702	37.016	Dwarfism_recessiv	-2.7883	0	0
1	0.3703	37.026	Dwarfism_recessiv	-2.7883	0	0
1	0.3705	37.052	Dwarfism_recessiv	-2.7883	0	0
1	0.3706	37.06	Dwarfism_recessiv	-2.7883	0	0
1	0.3707	37.075	Dwarfism_recessiv	-2.7883	0	0
1	0.3708	37.076	Dwarfism_recessiv	-2.7883	0	0
1	0.3708	37.078	Dwarfism_recessiv	-2.7883	0	0
1	0.3708	37.085	Dwarfism_recessiv	-2.7883	0	0
1	0.3709	37.093	Dwarfism_recessiv	-2.7883	0	0
1	0.3711	37.111	Dwarfism_recessiv	-2.7883	0	0
1	0.3716	37.158	Dwarfism_recessiv	-2.7883	0	0
1	0.3717	37.174	Dwarfism_recessiv	-2.7883	0	0
1	0.3719	37.186	Dwarfism_recessiv	-2.7883	0	0
1	0.3721	37.209	Dwarfism_recessiv	-2.7883	0	0
1	0.3728	37.285	Dwarfism_recessiv	-2.788	0	0
1	0.3731	37.315	Dwarfism_recessiv	-2.7883	0	0
1	0.3735	37.35	Dwarfism_recessiv	-2.7883	0	0
1	0.3736	37.357	Dwarfism_recessiv	-2.7881	0	0
1	0.3738	37.385	Dwarfism_recessiv	-2.7876	0	0
1	0.374	37.395	Dwarfism_recessiv	-2.7874	0	0
1	0.374	37.402	Dwarfism_recessiv	-2.7873	0	0
1	0.3752	37.516	Dwarfism_recessiv	-2.7881	0	0
1	0.3753	37.526	Dwarfism_recessiv	-2.7883	0	0
1	0.3755	37.55	Dwarfism_recessiv	-2.7883	0	0
1	0.3756	37.556	Dwarfism_recessiv	-2.7883	0	0
1	0.3756	37.565	Dwarfism_recessiv	-2.7883	0	0
1	0.3757	37.565	Dwarfism_recessiv	-2.7883	0	0
1	0.376	37.598	Dwarfism_recessiv	-2.7883	0	0
1	0.376	37.599	Dwarfism_recessiv	-2.7883	0	0
1	0.376	37.6	Dwarfism_recessiv	-2.7883	0	0
1	0.376	37.6	Dwarfism_recessiv	-2.7883	0	0
1	0.376	37.601	Dwarfism_recessiv	-2.7883	0	0
1	0.3762	37.616	Dwarfism_recessiv	-2.7883	0	0
1	0.3764	37.638	Dwarfism_recessiv	-2.7883	0	0
1	0.3766	37.656	Dwarfism_recessiv	-2.7883	0	0
1	0.3767	37.67	Dwarfism_recessiv	-2.7883	0	0
1	0.3768	37.68	Dwarfism_recessiv	-2.7883	0	0
1	0.377	37.695	Dwarfism_recessiv	-2.7883	0	0
1	0.3771	37.706	Dwarfism_recessiv	-2.787	0	0
1	0.3772	37.719	Dwarfism_recessiv	-2.7857	0	0
1	0.3772	37.72	Dwarfism_recessiv	-2.7855	0	0
1	0.3772	37.72	Dwarfism_recessiv	-2.7855	0	0
1	0.3772	37.722	Dwarfism_recessiv	-2.7854	0	0
1	0.3773	37.729	Dwarfism_recessiv	-2.7846	0	0
1	0.3775	37.746	Dwarfism_recessiv	-2.7829	0	0
1	0.3779	37.786	Dwarfism_recessiv	-2.7791	0	0
1	0.378	37.8	Dwarfism_recessiv	-2.778	0	0
1	0.3781	37.809	Dwarfism_recessiv	-2.7773	0	0
1	0.3783	37.835	Dwarfism_recessiv	-2.7754	0	0
1	0.3787	37.871	Dwarfism_recessiv	-2.773	0	0
1	0.3788	37.879	Dwarfism_recessiv	-2.7726	0	0
1	0.3791	37.906	Dwarfism_recessiv	-2.7711	0	0
1	0.3791	37.914	Dwarfism_recessiv	-2.7707	0	0
1	0.3791	37.915	Dwarfism_recessiv	-2.7707	0	0
1	0.3792	37.915	Dwarfism_recessiv	-2.7707	0	0
1	0.3792	37.919	Dwarfism_recessiv	-2.7705	0	0
1	0.3797	37.965	Dwarfism_recessiv	-2.7688	0	0
1	0.3801	38.007	Dwarfism_recessiv	-2.7678	0	0
1	0.3802	38.017	Dwarfism_recessiv	-2.7676	0	0
1	0.3803	38.026	Dwarfism_recessiv	-2.7675	0	0
1	0.3804	38.036	Dwarfism_recessiv	-2.7674	0	0
1	0.3805	38.05	Dwarfism_recessiv	-2.7673	0	0
1	0.3807	38.073	Dwarfism_recessiv	-2.7672	0	0
1	0.3809	38.091	Dwarfism_recessiv	-2.7673	0	0
1	0.3811	38.115	Dwarfism_recessiv	-2.7675	0	0
1	0.3813	38.131	Dwarfism_recessiv	-2.7678	0	0
1	0.3819	38.188	Dwarfism_recessiv	-2.7693	0	0
1	0.3821	38.209	Dwarfism_recessiv	-2.7701	0	0
1	0.3823	38.235	Dwarfism_recessiv	-2.7713	0	0
1	0.3827	38.272	Dwarfism_recessiv	-2.7733	0	0
1	0.3828	38.283	Dwarfism_recessiv	-2.7741	0	0
1	0.3829	38.293	Dwarfism_recessiv	-2.7747	0	0
1	0.3831	38.311	Dwarfism_recessiv	-2.776	0	0
1	0.3832	38.315	Dwarfism_recessiv	-2.7763	0	0
1	0.3833	38.334	Dwarfism_recessiv	-2.7777	0	0
1	0.3834	38.339	Dwarfism_recessiv	-2.7781	0	0
1	0.3835	38.354	Dwarfism_recessiv	-2.7794	0	0
1	0.3836	38.361	Dwarfism_recessiv	-2.78	0	0
1	0.3838	38.376	Dwarfism_recessiv	-2.7814	0	0
1	0.384	38.397	Dwarfism_recessiv	-2.7835	0	0
1	0.3841	38.41	Dwarfism_recessiv	-2.7848	0	0
1	0.3842	38.422	Dwarfism_recessiv	-2.7861	0	0
1	0.3843	38.432	Dwarfism_recessiv	-2.7872	0	0
1	0.3844	38.442	Dwarfism_recessiv	-2.7883	0	0
1	0.3846	38.455	Dwarfism_recessiv	-2.7883	0	0
1	0.385	38.496	Dwarfism_recessiv	-2.7883	0	0
1	0.3854	38.537	Dwarfism_recessiv	-2.7882	0	0
1	0.3855	38.549	Dwarfism_recessiv	-2.7883	0	0
1	0.3855	38.554	Dwarfism_recessiv	-2.7883	0	0
1	0.3857	38.573	Dwarfism_recessiv	-2.7883	0	0
1	0.3863	38.627	Dwarfism_recessiv	-2.7883	0	0
1	0.3866	38.662	Dwarfism_recessiv	-2.7879	0	0
1	0.3869	38.688	Dwarfism_recessiv	-2.7879	0	0
1	0.3869	38.694	Dwarfism_recessiv	-2.7879	0	0
1	0.3872	38.719	Dwarfism_recessiv	-2.7881	0	0
1	0.3873	38.731	Dwarfism_recessiv	-2.7883	0	0
1	0.3874	38.745	Dwarfism_recessiv	-2.7883	0	0
1	0.3875	38.753	Dwarfism_recessiv	-2.7883	0	0
1	0.3878	38.785	Dwarfism_recessiv	-2.7883	0	0
1	0.388	38.796	Dwarfism_recessiv	-2.7883	0	0
1	0.388	38.799	Dwarfism_recessiv	-2.7883	0	0
1	0.3881	38.813	Dwarfism_recessiv	-2.7883	0	0
1	0.3885	38.846	Dwarfism_recessiv	-2.7883	0	0
1	0.3886	38.856	Dwarfism_recessiv	-2.7881	0	0
1	0.3897	38.966	Dwarfism_recessiv	-2.7883	0	0
1	0.3898	38.977	Dwarfism_recessiv	-2.7883	0	0
1	0.3902	39.019	Dwarfism_recessiv	-2.7883	0	0
1	0.3903	39.035	Dwarfism_recessiv	-2.7883	0	0
1	0.3905	39.051	Dwarfism_recessiv	-2.7883	0	0
1	0.3914	39.144	Dwarfism_recessiv	-2.7883	0	0
1	0.3924	39.235	Dwarfism_recessiv	-2.7883	0	0
1	0.3948	39.478	Dwarfism_recessiv	-2.7883	0	0
1	0.3949	39.487	Dwarfism_recessiv	-2.7883	0	0
1	0.395	39.499	Dwarfism_recessiv	-2.7883	0	0
1	0.3953	39.529	Dwarfism_recessiv	-2.7883	0	0
1	0.3953	39.531	Dwarfism_recessiv	-2.7883	0	0
1	0.3958	39.578	Dwarfism_recessiv	-2.7883	0	0
1	0.3959	39.592	Dwarfism_recessiv	-2.7883	0	0
1	0.3961	39.606	Dwarfism_recessiv	-2.7883	0	0
1	0.3961	39.614	Dwarfism_recessiv	-2.7883	0	0
1	0.3966	39.66	Dwarfism_recessiv	-2.7883	0	0
1	0.3967	39.672	Dwarfism_recessiv	-2.7883	0	0
1	0.3969	39.686	Dwarfism_recessiv	-2.7883	0	0
1	0.397	39.696	Dwarfism_recessiv	-2.7883	0	0
1	0.3971	39.714	Dwarfism_recessiv	-2.7883	0	0
1	0.3973	39.732	Dwarfism_recessiv	-2.7883	0	0
1	0.3974	39.739	Dwarfism_recessiv	-2.7883	0	0
1	0.3975	39.755	Dwarfism_recessiv	-2.7883	0	0
1	0.3977	39.77	Dwarfism_recessiv	-2.7881	0	0
1	0.3979	39.788	Dwarfism_recessiv	-2.788	0	0
1	0.3984	39.838	Dwarfism_recessiv	-2.7883	0	0
1	0.3986	39.863	Dwarfism_recessiv	-2.7883	0	0
1	0.3987	39.867	Dwarfism_recessiv	-2.7883	0	0
1	0.3988	39.88	Dwarfism_recessiv	-2.7883	0	0
1	0.3992	39.92	Dwarfism_recessiv	-2.7881	0	0
1	0.3994	39.935	Dwarfism_recessiv	-2.7882	0	0
1	0.3995	39.948	Dwarfism_recessiv	-2.7883	0	0
1	0.4	39.998	Dwarfism_recessiv	-2.7883	0	0
1	0.4	40.004	Dwarfism_recessiv	-2.7883	0	0
1	0.4002	40.017	Dwarfism_recessiv	-2.7883	0	0
1	0.4003	40.035	Dwarfism_recessiv	-2.7883	0	0
1	0.4005	40.052	Dwarfism_recessiv	-2.7883	0	0
1	0.4008	40.076	Dwarfism_recessiv	-2.7883	0	0
1	0.4008	40.083	Dwarfism_recessiv	-2.7883	0	0
1	0.4009	40.093	Dwarfism_recessiv	-2.7883	0	0
1	0.401	40.095	Dwarfism_recessiv	-2.7883	0	0
1	0.4011	40.115	Dwarfism_recessiv	-2.7879	0	0
1	0.4013	40.13	Dwarfism_recessiv	-2.7877	0	0
1	0.4014	40.144	Dwarfism_recessiv	-2.7875	0	0
1	0.4015	40.153	Dwarfism_recessiv	-2.7875	0	0
1	0.4017	40.166	Dwarfism_recessiv	-2.7874	0	0
1	0.4017	40.167	Dwarfism_recessiv	-2.7874	0	0
1	0.4018	40.179	Dwarfism_recessiv	-2.7874	0	0
1	0.4019	40.194	Dwarfism_recessiv	-2.7875	0	0
1	0.402	40.201	Dwarfism_recessiv	-2.7876	0	0
1	0.4022	40.219	Dwarfism_recessiv	-2.7878	0	0
1	0.4022	40.222	Dwarfism_recessiv	-2.7879	0	0
1	0.4024	40.244	Dwarfism_recessiv	-2.7883	0	0
1	0.4026	40.262	Dwarfism_recessiv	-2.7883	0	0
1	0.4035	40.35	Dwarfism_recessiv	-2.7883	0	0
1	0.4036	40.362	Dwarfism_recessiv	-2.7883	0	0
1	0.4036	40.365	Dwarfism_recessiv	-2.7883	0	0
1	0.4037	40.374	Dwarfism_recessiv	-2.7883	0	0
1	0.4038	40.384	Dwarfism_recessiv	-2.7883	0	0
1	0.404	40.403	Dwarfism_recessiv	-2.7883	0	0
1	0.405	40.504	Dwarfism_recessiv	-2.7883	0	0
1	0.4051	40.509	Dwarfism_recessiv	-2.7883	0	0
1	0.4054	40.539	Dwarfism_recessiv	-2.7883	0	0
1	0.4054	40.539	Dwarfism_recessiv	-2.7883	0	0
1	0.4054	40.544	Dwarfism_recessiv	-2.7883	0	0
1	0.4055	40.547	Dwarfism_recessiv	-2.7883	0	0
1	0.4055	40.547	Dwarfism_recessiv	-2.7883	0	0
1	0.4059	40.586	Dwarfism_recessiv	-2.788	0	0
1	0.4062	40.619	Dwarfism_recessiv	-2.7881	0	0
1	0.4064	40.636	Dwarfism_recessiv	-2.7883	0	0
1	0.4064	40.636	Dwarfism_recessiv	-2.7883	0	0
1	0.4065	40.647	Dwarfism_recessiv	-2.7882	0	0
1	0.4065	40.652	Dwarfism_recessiv	-2.7882	0	0
1	0.4069	40.69	Dwarfism_recessiv	-2.7882	0	0
1	0.4071	40.713	Dwarfism_recessiv	-2.7882	0	0
1	0.4072	40.716	Dwarfism_recessiv	-2.7882	0	0
1	0.4076	40.758	Dwarfism_recessiv	-2.7879	0	0
1	0.408	40.799	Dwarfism_recessiv	-2.7881	0	0
1	0.4081	40.807	Dwarfism_recessiv	-2.7882	0	0
1	0.4082	40.82	Dwarfism_recessiv	-2.7882	0	0
1	0.4086	40.858	Dwarfism_recessiv	-2.7882	0	0
1	0.4086	40.865	Dwarfism_recessiv	-2.7882	0	0
1	0.4088	40.882	Dwarfism_recessiv	-2.7882	0	0
1	0.409	40.902	Dwarfism_recessiv	-2.7882	0	0
1	0.4091	40.908	Dwarfism_recessiv	-2.7882	0	0
1	0.4091	40.908	Dwarfism_recessiv	-2.7882	0	0
1	0.4091	40.909	Dwarfism_recessiv	-2.7882	0	0
1	0.4091	40.911	Dwarfism_recessiv	-2.7882	0	0
1	0.4093	40.929	Dwarfism_recessiv	-2.7882	0	0
1	0.4093	40.93	Dwarfism_recessiv	-2.7882	0	0
1	0.4099	40.986	Dwarfism_recessiv	-2.7882	0	0
1	0.4099	40.989	Dwarfism_recessiv	-2.7882	0	0
1	0.41	41.001	Dwarfism_recessiv	-2.7882	0	0
1	0.4101	41.013	Dwarfism_recessiv	-2.7881	0	0
1	0.4102	41.025	Dwarfism_recessiv	-2.7881	0	0
1	0.4103	41.026	Dwarfism_recessiv	-2.7881	0	0
1	0.4104	41.043	Dwarfism_recessiv	-2.7882	0	0
1	0.4105	41.047	Dwarfism_recessiv	-2.7882	0	0
1	0.4106	41.062	Dwarfism_recessiv	-2.7882	0	0
1	0.4107	41.072	Dwarfism_recessiv	-2.7882	0	0
1	0.4109	41.091	Dwarfism_recessiv	-2.7882	0	0
1	0.4112	41.118	Dwarfism_recessiv	-2.7882	0	0
1	0.4112	41.119	Dwarfism_recessiv	-2.7882	0	0
1	0.4113	41.129	Dwarfism_recessiv	-2.7882	0	0
1	0.4113	41.132	Dwarfism_recessiv	-2.7882	0	0
1	0.4114	41.14	Dwarfism_recessiv	-2.7882	0	0
1	0.4115	41.15	Dwarfism_recessiv	-2.7882	0	0
1	0.4117	41.169	Dwarfism_recessiv	-2.7882	0	0
1	0.4118	41.177	Dwarfism_recessiv	-2.7882	0	0
1	0.4119	41.19	Dwarfism_recessiv	-2.7882	0	0
1	0.412	41.205	Dwarfism_recessiv	-2.7882	0	0
1	0.4121	41.207	Dwarfism_recessiv	-2.7882	0	0
1	0.4122	41.219	Dwarfism_recessiv	-2.7882	0	0
1	0.4124	41.238	Dwarfism_recessiv	-2.7882	0	0
1	0.4126	41.26	Dwarfism_recessiv	-2.7882	0	0
1	0.4127	41.269	Dwarfism_recessiv	-2.7881	0	0
1	0.4129	41.295	Dwarfism_recessiv	-2.7877	0	0
1	0.4129	41.295	Dwarfism_recessiv	-2.7877	0	0
1	0.413	41.297	Dwarfism_recessiv	-2.7877	0	0
1	0.4131	41.305	Dwarfism_recessiv	-2.7876	0	0
1	0.4139	41.389	Dwarfism_recessiv	-2.7882	0	0
1	0.414	41.395	Dwarfism_recessiv	-2.7882	0	0
1	0.4141	41.407	Dwarfism_recessiv	-2.7882	0	0
1	0.4145	41.453	Dwarfism_recessiv	-2.7882	0	0
1	0.4149	41.494	Dwarfism_recessiv	-2.7882	0	0
1	0.415	41.496	Dwarfism_recessiv	-2.7882	0	0
1	0.415	41.496	Dwarfism_recessiv	-2.7882	0	0
1	0.415	41.498	Dwarfism_recessiv	-2.7882	0	0
1	0.415	41.498	Dwarfism_recessiv	-2.7882	0	0
1	0.4161	41.614	Dwarfism_recessiv	-2.7883	0	0
1	0.4167	41.671	Dwarfism_recessiv	-2.7883	0	0
1	0.4176	41.761	Dwarfism_recessiv	-2.7883	0	0
1	0.4181	41.805	Dwarfism_recessiv	-2.7883	0	0
[truncated: 102,755 more rows]
