# Supplementary material for: PRKG2 Splice Site Variant in Dogo Argentino Dogs with Disproportionate Dwarfism
Source: Genes (Basel). 2021 Sep 24;12(10):1489. doi: 10.3390/genes12101489 (PMC8535654; doi:10.3390/genes12101489)
Supplement: Supplementary file 1 [file genes-12-01489-s001.zip › Table_S2_Private_Variants.xlsx]

## Sheet: Sheet1
Table S2. Private variants in the genome of the affected Dogo Argentino DG0003. Variants were called with respect to the CanFam 3.1 reference genome assembly. The functional annotation of the variants is based on the NCBI annotation release 105. The table is in "1 effect per line" format. Thus, one variant will be listed several times, if multiple effects, e.g. on different alternative transcript…
#CHROM	POS	REF	ALT	FILTER	ALLELE	EFFECT	IMPACT	GENE	GENEID	FEATURE	FEATUREID	BIOTYPE	RANK	HGVS_C	HGVS_P
1	1774001	T	G	PASS	G	intergenic_region	MODIFIER	LOC111092029-LOC102155992	111092029-102155992	intergenic_region	111092029-102155992		-1	n.1774001T>G
1	1774004	T	G	PASS	G	intergenic_region	MODIFIER	LOC111092029-LOC102155992	111092029-102155992	intergenic_region	111092029-102155992		-1	n.1774004T>G
1	10613583	T	C	PASS	C	intergenic_region	MODIFIER	LOC483946-LOC483947	483946-483947	intergenic_region	483946-483947		-1	n.10613583T>C
1	11421189	C	T	PASS	T	intergenic_region	MODIFIER	LOC102154255-LOC111090599	102154255-111090599	intergenic_region	102154255-111090599		-1	n.11421189C>T
1	11499088	A	T	PASS	T	intron_variant	MODIFIER	LOC111090601	111090601	transcript	XR_002615274.1	pseudogene	2	n.235+380T>A
1	11499096	G	A	PASS	A	intron_variant	MODIFIER	LOC111090601	111090601	transcript	XR_002615274.1	pseudogene	2	n.235+372C>T
1	11618550	C	T	PASS	T	intergenic_region	MODIFIER	LOC100684751-CDH7	100684751-483949	intergenic_region	100684751-483949		-1	n.11618550C>T
1	11640417	T	G	PASS	G	intergenic_region	MODIFIER	LOC100684751-CDH7	100684751-483949	intergenic_region	100684751-483949		-1	n.11640417T>G
1	12238469	C	A	PASS	A	intergenic_region	MODIFIER	LOC111093733-LOC111093764	111093733-111093764	intergenic_region	111093733-111093764		-1	n.12238469C>A
1	12313698	C	G	PASS	G	intergenic_region	MODIFIER	LOC111093733-LOC111093764	111093733-111093764	intergenic_region	111093733-111093764		-1	n.12313698C>G
1	12572117	C	T	PASS	T	intergenic_region	MODIFIER	LOC111093733-LOC111093764	111093733-111093764	intergenic_region	111093733-111093764		-1	n.12572117C>T
1	12666998	G	A	PASS	A	intergenic_region	MODIFIER	LOC111093733-LOC111093764	111093733-111093764	intergenic_region	111093733-111093764		-1	n.12666998G>A
1	12708057	C	A	PASS	A	intergenic_region	MODIFIER	LOC111093733-LOC111093764	111093733-111093764	intergenic_region	111093733-111093764		-1	n.12708057C>A
1	12837104	G	A	PASS	A	downstream_gene_variant	MODIFIER	LOC111090602	111090602	transcript	XR_002615278.1	pseudogene	-1	n.*4667G>A
1	12837104	G	A	PASS	A	downstream_gene_variant	MODIFIER	LOC111090602	111090602	transcript	XR_002615284.1	pseudogene	-1	n.*4667G>A
1	12837104	G	A	PASS	A	intergenic_region	MODIFIER	LOC111090602-LOC111093811	111090602-111093811	intergenic_region	111090602-111093811		-1	n.12837104G>A
1	12848891	C	G	PASS	G	intergenic_region	MODIFIER	LOC111090602-LOC111093811	111090602-111093811	intergenic_region	111090602-111093811		-1	n.12848891C>G
1	12965281	C	T	PASS	T	intergenic_region	MODIFIER	LOC111090602-LOC111093811	111090602-111093811	intergenic_region	111090602-111093811		-1	n.12965281C>T
1	13083936	C	T	PASS	T	intergenic_region	MODIFIER	LOC111093811-LOC607205	111093811-607205	intergenic_region	111093811-607205		-1	n.13083936C>T
1	13229496	A	C	PASS	C	downstream_gene_variant	MODIFIER	SERPINB10	483951	transcript	XM_541071.4	protein_coding	-1	c.*4906T>G
1	13229496	A	C	PASS	C	intergenic_region	MODIFIER	LOC607205-SERPINB10	607205-483951	intergenic_region	607205-483951		-1	n.13229496A>C
1	13266648	T	C	PASS	C	upstream_gene_variant	MODIFIER	LOC111093874	111093874	transcript	XR_002622621.1	pseudogene	-1	n.-1514T>C
1	13266648	T	C	PASS	C	upstream_gene_variant	MODIFIER	LOC111093874	111093874	transcript	XR_002622654.1	pseudogene	-1	n.-1514T>C
1	13266648	T	C	PASS	C	intron_variant	MODIFIER	SERPINB2	609604	transcript	XM_014106918.1	protein_coding	5	c.553+604A>G
1	13266648	T	C	PASS	C	intron_variant	MODIFIER	SERPINB2	609604	transcript	XM_846892.4	protein_coding	5	c.532+604A>G
1	13494536	C	T	PASS	T	intron_variant	MODIFIER	SERPINB13	483955	transcript	XM_005615342.3	protein_coding	8	c.898-436G>A
1	13494536	C	T	PASS	T	intron_variant	MODIFIER	SERPINB13	483955	transcript	XM_022414725.1	protein_coding	7	c.898-436G>A
1	14907317	C	T	PASS	T	upstream_gene_variant	MODIFIER	LOC111090609	111090609	transcript	XR_002615297.1	pseudogene	-1	n.-2738G>A
1	14907317	C	T	PASS	T	intergenic_region	MODIFIER	LOC111090609-RNF152	111090609-609935	intergenic_region	111090609-609935		-1	n.14907317C>T
1	15774038	G	A	PASS	A	intergenic_region	MODIFIER	LOC100688146-LOC483960	100688146-483960	intergenic_region	100688146-483960		-1	n.15774038G>A
1	21038081	T	C	PASS	C	intron_variant	MODIFIER	LOC111095182	111095182	transcript	XR_002625012.1	pseudogene	1	n.62-11781A>G
1	46553986	GGGAGAAGCA	G	PASS	G	intron_variant	MODIFIER	ARID1B	484047	transcript	XM_022424996.1	protein_coding	7	c.1545+28647_1545+28655delGGAGAAGCA
1	46553997	G	GTTCT	PASS	GTTCT	intron_variant	MODIFIER	ARID1B	484047	transcript	XM_022424996.1	protein_coding	7	c.1545+28657_1545+28658insTTCT
1	48936436	C	T	PASS	T	intergenic_region	MODIFIER	FNDC1-SOD2	484061-476258	intergenic_region	484061-476258		-1	n.48936436C>T
1	48942244	A	G	PASS	G	downstream_gene_variant	MODIFIER	SOD2	476258	transcript	XM_533463.6	protein_coding	-1	c.*4096T>C
1	48942244	A	G	PASS	G	intergenic_region	MODIFIER	FNDC1-SOD2	484061-476258	intergenic_region	484061-476258		-1	n.48942244A>G
1	50372425	A	G	PASS	G	intron_variant	MODIFIER	PRKN	612316	transcript	XM_850059.5	protein_coding	6	c.732-69012T>C
1	51760953	C	T	PASS	T	downstream_gene_variant	MODIFIER	LOC102151615	102151615	transcript	XR_002626748.1	pseudogene	-1	n.*418G>A
1	51760953	C	T	PASS	T	downstream_gene_variant	MODIFIER	LOC102151615	102151615	transcript	XR_291278.3	pseudogene	-1	n.*418G>A
1	51760953	C	T	PASS	T	downstream_gene_variant	MODIFIER	LOC102151615	102151615	transcript	XR_001316083.2	pseudogene	-1	n.*418G>A
1	51760953	C	T	PASS	T	downstream_gene_variant	MODIFIER	LOC102151615	102151615	transcript	XR_002626747.1	pseudogene	-1	n.*418G>A
1	51760953	C	T	PASS	T	intergenic_region	MODIFIER	LOC111095931-LOC102151615	111095931-102151615	intergenic_region	111095931-102151615		-1	n.51760953C>T
1	52111927	C	A	PASS	A	intergenic_region	MODIFIER	LOC106559668-LOC111090691	106559668-111090691	intergenic_region	106559668-111090691		-1	n.52111927C>A
1	52134701	C	T	PASS	T	intergenic_region	MODIFIER	LOC106559668-LOC111090691	106559668-111090691	intergenic_region	106559668-111090691		-1	n.52134701C>T
1	55500249	C	T	PASS	T	intron_variant	MODIFIER	AFDN	431695	transcript	XM_022419031.1	protein_coding	22	c.2976+4654C>T
1	55500249	C	T	PASS	T	intron_variant	MODIFIER	AFDN	431695	transcript	XM_022419033.1	protein_coding	22	c.2976+4654C>T
1	55500249	C	T	PASS	T	intron_variant	MODIFIER	AFDN	431695	transcript	XM_022419034.1	protein_coding	22	c.2973+4654C>T
1	55500249	C	T	PASS	T	intron_variant	MODIFIER	AFDN	431695	transcript	XM_022419039.1	protein_coding	22	c.2973+4654C>T
1	55500249	C	T	PASS	T	intron_variant	MODIFIER	AFDN	431695	transcript	XM_022419041.1	protein_coding	22	c.2976+4654C>T
1	55500249	C	T	PASS	T	intron_variant	MODIFIER	AFDN	431695	transcript	XM_022419044.1	protein_coding	22	c.2970+4654C>T
1	55500249	C	T	PASS	T	intron_variant	MODIFIER	AFDN	431695	transcript	XM_022419047.1	protein_coding	22	c.2976+4654C>T
1	55500249	C	T	PASS	T	intron_variant	MODIFIER	AFDN	431695	transcript	XM_022419076.1	protein_coding	22	c.2976+4654C>T
1	55500249	C	T	PASS	T	intron_variant	MODIFIER	AFDN	431695	transcript	XM_022419055.1	protein_coding	21	c.2955+4654C>T
1	55500249	C	T	PASS	T	intron_variant	MODIFIER	AFDN	431695	transcript	XM_022419058.1	protein_coding	22	c.2976+4654C>T
1	55500249	C	T	PASS	T	intron_variant	MODIFIER	AFDN	431695	transcript	XM_022419066.1	protein_coding	22	c.2976+4654C>T
1	55500249	C	T	PASS	T	intron_variant	MODIFIER	AFDN	431695	transcript	XM_022419071.1	protein_coding	21	c.2931+4654C>T
1	55500249	C	T	PASS	T	intron_variant	MODIFIER	AFDN	431695	transcript	XM_022419073.1	protein_coding	21	c.2955+4654C>T
1	55500249	C	T	PASS	T	intron_variant	MODIFIER	AFDN	431695	transcript	XM_014113200.1	protein_coding	21	c.2952+4654C>T
1	55500249	C	T	PASS	T	intron_variant	MODIFIER	AFDN	431695	transcript	XM_014113198.1	protein_coding	21	c.2952+4654C>T
1	55500249	C	T	PASS	T	intron_variant	MODIFIER	AFDN	431695	transcript	XM_022419083.1	protein_coding	20	c.2904+4654C>T
1	55500249	C	T	PASS	T	intron_variant	MODIFIER	AFDN	431695	transcript	XM_022419086.1	protein_coding	20	c.2904+4654C>T
1	55812679	T	G	PASS	G	intergenic_region	MODIFIER	LOC102153625-SMOC2	102153625-476270	intergenic_region	102153625-476270		-1	n.55812679T>G
1	55812680	T	C	PASS	C	intergenic_region	MODIFIER	LOC102153625-SMOC2	102153625-476270	intergenic_region	102153625-476270		-1	n.55812680T>C
1	58312821	AAAACAG	A	PASS	A	intron_variant	MODIFIER	SLC35F1	484103	transcript	XM_541220.6	protein_coding	2	c.350-14023_350-14018delAAACAG
1	59085370	T	TCC	PASS	TCC	intergenic_region	MODIFIER	LOC111096169-LOC100687227	111096169-100687227	intergenic_region	111096169-100687227		-1	n.59085370_59085371insCC
1	59672996	C	T	PASS	T	intergenic_region	MODIFIER	LOC100687379-LOC106559260	100687379-106559260	intergenic_region	100687379-106559260		-1	n.59672996C>T
1	60728154	A	T	PASS	T	intron_variant	MODIFIER	TBC1D32	484107	transcript	XM_005615601.3	protein_coding	26	c.2903-8419T>A
1	60728154	A	T	PASS	T	intron_variant	MODIFIER	LOC111096177	111096177	transcript	XR_002627278.1	pseudogene	1	n.823-4520A>T
1	60728154	A	T	PASS	T	intron_variant	MODIFIER	TBC1D32	484107	transcript	XM_022419499.1	protein_coding	23	c.2243-8419T>A
1	60728154	A	T	PASS	T	intron_variant	MODIFIER	TBC1D32	484107	transcript	XM_014113418.2	protein_coding	25	c.2777-8419T>A
1	60728154	A	T	PASS	T	intron_variant	MODIFIER	TBC1D32	484107	transcript	XM_022419495.1	protein_coding	26	c.2903-8419T>A
1	60728154	A	T	PASS	T	intron_variant	MODIFIER	TBC1D32	484107	transcript	XM_005615602.3	protein_coding	26	c.2903-8419T>A
1	60728154	A	T	PASS	T	intron_variant	MODIFIER	TBC1D32	484107	transcript	XR_002627254.1	pseudogene	26	n.3051-8419T>A
1	64869235	C	T	PASS	T	upstream_gene_variant	MODIFIER	TRMT11	476285	transcript	XM_022419761.1	protein_coding	-1	c.-5826C>T
1	64869235	C	T	PASS	T	intron_variant	MODIFIER	TRMT11	476285	transcript	XM_533490.6	protein_coding	2	c.139-764C>T
1	64869235	C	T	PASS	T	intron_variant	MODIFIER	TRMT11	476285	transcript	XM_022419758.1	protein_coding	2	c.-51-764C>T
1	64869235	C	T	PASS	T	intron_variant	MODIFIER	TRMT11	476285	transcript	XM_022419748.1	protein_coding	1	c.-51-764C>T
1	64869235	C	T	PASS	T	intron_variant	MODIFIER	TRMT11	476285	transcript	XM_022419756.1	protein_coding	1	c.-51-764C>T
1	64869235	C	T	PASS	T	intron_variant	MODIFIER	TRMT11	476285	transcript	XM_022419741.1	protein_coding	1	c.-128-764C>T
1	68024974	G	A	PASS	A	intron_variant	MODIFIER	LAMA2	100683420	transcript	XM_022419950.1	protein_coding	46	c.6568-1691G>A
1	68204105	T	C	PASS	C	intron_variant	MODIFIER	ARHGAP18	476292	transcript	NM_001286967.1	protein_coding	2	c.111-2877A>G
1	68578432	G	A	PASS	A	intron_variant	MODIFIER	L3MBTL3	612721	transcript	XM_022426420.1	protein_coding	10	c.751-656G>A
1	68595270	C	A	PASS	A	intron_variant	MODIFIER	L3MBTL3	612721	transcript	XM_022426420.1	protein_coding	14	c.1236-5640C>A
1	69203185	G	A	PASS	A	downstream_gene_variant	MODIFIER	LOC102151410	102151410	transcript	102151410	pseudogene	-1	n.*1372G>A
1	69203185	G	A	PASS	A	intron_variant	MODIFIER	EPB41L2	484127	transcript	XM_014113713.2	protein_coding	3	c.730-10429C>T
1	69203185	G	A	PASS	A	intron_variant	MODIFIER	EPB41L2	484127	transcript	XM_005615643.3	protein_coding	3	c.730-10429C>T
1	69203185	G	A	PASS	A	intron_variant	MODIFIER	EPB41L2	484127	transcript	XM_005615649.3	protein_coding	3	c.730-10429C>T
1	69203185	G	A	PASS	A	intron_variant	MODIFIER	EPB41L2	484127	transcript	XM_005615650.3	protein_coding	3	c.730-10429C>T
1	69203185	G	A	PASS	A	intron_variant	MODIFIER	EPB41L2	484127	transcript	XM_014113762.2	protein_coding	3	c.730-10429C>T
1	69203185	G	A	PASS	A	intron_variant	MODIFIER	EPB41L2	484127	transcript	XM_014113784.2	protein_coding	3	c.730-10429C>T
1	69203185	G	A	PASS	A	intron_variant	MODIFIER	EPB41L2	484127	transcript	XM_005615638.3	protein_coding	3	c.730-10429C>T
1	69203185	G	A	PASS	A	intron_variant	MODIFIER	EPB41L2	484127	transcript	XM_005615642.3	protein_coding	3	c.730-10429C>T
1	69203185	G	A	PASS	A	intron_variant	MODIFIER	EPB41L2	484127	transcript	XM_005615646.3	protein_coding	3	c.730-10429C>T
1	69203185	G	A	PASS	A	intron_variant	MODIFIER	EPB41L2	484127	transcript	XM_014113738.2	protein_coding	3	c.730-10429C>T
1	69203185	G	A	PASS	A	intron_variant	MODIFIER	EPB41L2	484127	transcript	XM_014113757.2	protein_coding	3	c.730-10429C>T
1	69203185	G	A	PASS	A	intron_variant	MODIFIER	EPB41L2	484127	transcript	XM_022420038.1	protein_coding	3	c.730-10429C>T
1	69203185	G	A	PASS	A	intron_variant	MODIFIER	EPB41L2	484127	transcript	XM_846519.5	protein_coding	3	c.730-10429C>T
1	69203185	G	A	PASS	A	intron_variant	MODIFIER	EPB41L2	484127	transcript	XM_014113766.2	protein_coding	3	c.730-10429C>T
1	69203185	G	A	PASS	A	intron_variant	MODIFIER	EPB41L2	484127	transcript	XM_022419991.1	protein_coding	3	c.730-10429C>T
1	69203185	G	A	PASS	A	intron_variant	MODIFIER	EPB41L2	484127	transcript	XM_022420009.1	protein_coding	3	c.730-10429C>T
1	69203185	G	A	PASS	A	intron_variant	MODIFIER	EPB41L2	484127	transcript	XM_014113725.2	protein_coding	3	c.670-10429C>T
1	69203185	G	A	PASS	A	intron_variant	MODIFIER	EPB41L2	484127	transcript	XM_022419997.1	protein_coding	3	c.670-10429C>T
1	69203185	G	A	PASS	A	intron_variant	MODIFIER	EPB41L2	484127	transcript	XM_014113726.2	protein_coding	3	c.670-10429C>T
1	69203185	G	A	PASS	A	intron_variant	MODIFIER	EPB41L2	484127	transcript	XM_022419989.1	protein_coding	3	c.730-10429C>T
1	69203185	G	A	PASS	A	intron_variant	MODIFIER	EPB41L2	484127	transcript	XR_001316238.2	pseudogene	3	n.796-10429C>T
1	69203185	G	A	PASS	A	intron_variant	MODIFIER	EPB41L2	484127	transcript	XM_022420042.1	protein_coding	3	c.730-10429C>T
1	70521348	C	T	PASS	T	intron_variant	MODIFIER	SLC35D2	100856233	transcript	XM_003638846.4	protein_coding	8	c.715-2600C>T
1	70521348	C	T	PASS	T	intron_variant	MODIFIER	SLC35D2	100856233	transcript	XM_014117165.2	protein_coding	6	c.518+8614C>T
1	73052756	TTACTCG	T	PASS	T	intergenic_region	MODIFIER	LOC111096384-LOC106559315	111096384-106559315	intergenic_region	111096384-106559315		-1	n.73052757_73052762delTACTCG
1	79721791	A	G	PASS	G	intergenic_region	MODIFIER	LOC111096618-LOC100684877	111096618-100684877	intergenic_region	111096618-100684877		-1	n.79721791A>G
1	83302263	T	C	PASS	C	intron_variant	MODIFIER	TRPM6	484163	transcript	XM_022421107.1	protein_coding	3	c.9+11932T>C
1	83339473	G	A	PASS	A	downstream_gene_variant	MODIFIER	LOC111096676	111096676	transcript	XR_002628365.1	pseudogene	-1	n.*1465C>T
1	83339473	G	A	PASS	A	intron_variant	MODIFIER	TRPM6	484163	transcript	XM_022421100.1	protein_coding	3	c.153-415G>A
1	83339473	G	A	PASS	A	intron_variant	MODIFIER	TRPM6	484163	transcript	XM_022421107.1	protein_coding	5	c.129-415G>A
1	83339473	G	A	PASS	A	intron_variant	MODIFIER	TRPM6	484163	transcript	XR_002628356.1	pseudogene	3	n.1352-415G>A
1	83339473	G	A	PASS	A	intron_variant	MODIFIER	TRPM6	484163	transcript	XM_022421102.1	protein_coding	3	c.153-415G>A
1	83339473	G	A	PASS	A	intron_variant	MODIFIER	TRPM6	484163	transcript	XM_014117536.2	protein_coding	3	c.153-415G>A
1	83339473	G	A	PASS	A	intron_variant	MODIFIER	TRPM6	484163	transcript	XM_014117537.2	protein_coding	3	c.153-415G>A
1	83339473	G	A	PASS	A	intron_variant	MODIFIER	TRPM6	484163	transcript	XM_022421103.1	protein_coding	3	c.138-415G>A
1	88824969	C	T	PASS	T	3_prime_UTR_variant	MODIFIER	PGM5	476332	transcript	XM_014117685.2	protein_coding	11	c.*357G>A
1	88824969	C	T	PASS	T	3_prime_UTR_variant	MODIFIER	PGM5	476332	transcript	XM_022421512.1	protein_coding	11	c.*357G>A
1	88824969	C	T	PASS	T	3_prime_UTR_variant	MODIFIER	PGM5	476332	transcript	XM_022421511.1	protein_coding	11	c.*357G>A
1	88824969	C	T	PASS	T	downstream_gene_variant	MODIFIER	TMEM252	609117	transcript	XM_846320.5	protein_coding	-1	c.*6686C>T
1	88824969	C	T	PASS	T	downstream_gene_variant	MODIFIER	TMEM252	609117	transcript	XR_291341.3	pseudogene	-1	n.*4412C>T
1	98516617	C	T	PASS	T	intron_variant	MODIFIER	WNK2	484210	transcript	XM_022428018.1	protein_coding	1	c.658-8096G>A
1	99867973	G	C	PASS	C	intergenic_region	MODIFIER	ZSCAN1-ZNF606	100856218-484238	intergenic_region	100856218-484238		-1	n.99867973G>C
1	102342047	G	C	PASS	C	5_prime_UTR_variant	MODIFIER	KMT5C	484295	transcript	XM_005616193.2	protein_coding	1	c.-91C>G
1	102342047	G	C	PASS	C	upstream_gene_variant	MODIFIER	KMT5C	484295	transcript	XM_022427410.1	protein_coding	-1	c.-859C>G
1	102662448	C	CG	PASS	CG	intergenic_region	MODIFIER	NLRP2-NCR1	484304-611390	intergenic_region	484304-611390		-1	n.102662448_102662449insG
1	102723753	A	G	PASS	G	upstream_gene_variant	MODIFIER	FCAR	106559252	transcript	XM_014116440.1	protein_coding	-1	c.-3073T>C
1	102723753	A	G	PASS	G	intergenic_region	MODIFIER	FCAR-LOC100688493	106559252-100688493	intergenic_region	106559252-100688493		-1	n.102723753A>G
1	102870572	G	A	PASS	A	missense_variant	MODERATE	TTYH1	476386	transcript	XM_533589.6	protein_coding	3	c.395C>T	p.Thr132Met
1	102870572	G	A	PASS	A	missense_variant	MODERATE	TTYH1	476386	transcript	XM_857514.5	protein_coding	3	c.395C>T	p.Thr132Met
1	102870572	G	A	PASS	A	missense_variant	MODERATE	TTYH1	476386	transcript	XM_022427427.1	protein_coding	3	c.395C>T	p.Thr132Met
1	102870572	G	A	PASS	A	intron_variant	MODIFIER	TTYH1	476386	transcript	XR_002632979.1	pseudogene	3	n.389-826C>T
1	102870572	G	A	PASS	A	non_coding_transcript_exon_variant	MODIFIER	TTYH1	476386	transcript	XR_002632969.1	pseudogene	4	n.474C>T
1	102870572	G	A	PASS	A	non_coding_transcript_exon_variant	MODIFIER	TTYH1	476386	transcript	XR_002632963.1	pseudogene	3	n.498C>T
1	102870572	G	A	PASS	A	non_coding_transcript_exon_variant	MODIFIER	TTYH1	476386	transcript	XR_002632964.1	pseudogene	3	n.498C>T
1	108485310	C	A	PASS	A	intron_variant	MODIFIER	ZNF541	484419	transcript	XM_005616379.3	protein_coding	7	c.2781+57C>A
1	108485310	C	A	PASS	A	intron_variant	MODIFIER	ZNF541	484419	transcript	XM_005616380.3	protein_coding	8	c.2781+57C>A
1	108737998	C	T	PASS	T	upstream_gene_variant	MODIFIER	LOC102156678	102156678	transcript	XR_002630711.1	pseudogene	-1	n.-3369G>A
1	108737998	C	T	PASS	T	upstream_gene_variant	MODIFIER	LOC102156678	102156678	transcript	XR_002630710.1	pseudogene	-1	n.-3369G>A
1	108737998	C	T	PASS	T	upstream_gene_variant	MODIFIER	BBC3	612153	transcript	XM_849883.5	protein_coding	-1	c.-7752C>T
1	108737998	C	T	PASS	T	intergenic_region	MODIFIER	LOC102156678-BBC3	102156678-612153	intergenic_region	102156678-612153		-1	n.108737998C>T
1	108841998	G	A	PASS	A	upstream_gene_variant	MODIFIER	SAE1	476425	transcript	XM_014119402.2	protein_coding	-1	c.-14373C>T
1	108841998	G	A	PASS	A	intron_variant	MODIFIER	SAE1	476425	transcript	XM_022424622.1	protein_coding	2	c.-16-1675C>T
1	108841998	G	A	PASS	A	intron_variant	MODIFIER	SAE1	476425	transcript	XM_022424632.1	protein_coding	2	c.-16-1675C>T
1	108841998	G	A	PASS	A	intron_variant	MODIFIER	SAE1	476425	transcript	XM_022424626.1	protein_coding	2	c.-12-1679C>T
1	109339284	G	GC	PASS	GC	upstream_gene_variant	MODIFIER	LOC102151839	102151839	transcript	XM_005642453.3	protein_coding	-1	c.-4620_-4619insC
1	109339284	G	GC	PASS	GC	intergenic_region	MODIFIER	PNMA8B-LOC102151839	102151617-102151839	intergenic_region	102151617-102151839		-1	n.109339284_109339285insC
1	109382512	G	A	PASS	A	downstream_gene_variant	MODIFIER	LOC111097749	111097749	transcript	XR_002630820.1	pseudogene	-1	n.*1992C>T
1	109382512	G	A	PASS	A	intergenic_region	MODIFIER	LOC612190-LOC111097749	612190-111097749	intergenic_region	612190-111097749		-1	n.109382512G>A
1	109403561	T	A	PASS	A	3_prime_UTR_variant	MODIFIER	LOC102151906	102151906	transcript	XM_022405152.1	protein_coding	2	c.*377A>T
1	109436857	G	A	PASS	A	intergenic_region	MODIFIER	LOC102151906-LOC111097753	102151906-111097753	intergenic_region	102151906-111097753		-1	n.109436857G>A
1	109439390	TA	T	PASS	T	intergenic_region	MODIFIER	LOC102151906-LOC111097753	102151906-111097753	intergenic_region	102151906-111097753		-1	n.109439391delA
1	109484770	T	G	PASS	G	downstream_gene_variant	MODIFIER	LOC102152105	102152105	transcript	XR_291422.3	pseudogene	-1	n.*1078T>G
1	109484770	T	G	PASS	G	intron_variant	MODIFIER	HIF3A	476429	transcript	XM_533636.6	protein_coding	11	c.1441-1790A>C
1	109484770	T	G	PASS	G	intron_variant	MODIFIER	HIF3A	476429	transcript	XM_014119507.2	protein_coding	11	c.1273-1790A>C
1	109484770	T	G	PASS	G	intron_variant	MODIFIER	HIF3A	476429	transcript	XM_022424748.1	protein_coding	9	c.1186-1790A>C
1	110098709	G	A	PASS	A	intergenic_region	MODIFIER	FOSB-ERCC1	484445-612282	intergenic_region	484445-612282		-1	n.110098709G>A
1	110476981	CA	C	PASS	C	intron_variant	MODIFIER	CLPTM1	484455	transcript	XM_541570.6	protein_coding	7	c.794-108delT
1	110476981	CA	C	PASS	C	intron_variant	MODIFIER	CLPTM1	484455	transcript	XM_022425000.1	protein_coding	7	c.770-108delT
1	110559771	T	TC	PASS	TC	intron_variant	MODIFIER	NECTIN2	611060	transcript	XM_847558.5	protein_coding	1	c.98-980_98-979insG
1	110559771	T	TC	PASS	TC	intron_variant	MODIFIER	NECTIN2	611060	transcript	XM_022425008.1	protein_coding	1	c.56-980_56-979insG
1	110559771	T	TC	PASS	TC	intron_variant	MODIFIER	NECTIN2	611060	transcript	XM_005616462.3	protein_coding	1	c.98-980_98-979insG
1	110675395	G	A	PASS	A	intron_variant	MODIFIER	CEACAM19	100687409	transcript	XM_003432657.3	protein_coding	6	c.706-130C>T
1	112726379	G	A	PASS	A	intron_variant	MODIFIER	AXL	484490	transcript	XM_022405907.1	protein_coding	1	c.64+499C>T
1	113251258	A	G	PASS	G	intron_variant	MODIFIER	BLVRB	476456	transcript	XM_533666.6	protein_coding	1	c.80-1241A>G
1	113251258	A	G	PASS	G	intron_variant	MODIFIER	BLVRB	476456	transcript	XM_022425584.1	protein_coding	1	c.80-1241A>G
1	113294430	C	T	PASS	T	upstream_gene_variant	MODIFIER	HIPK4	476458	transcript	XM_005616559.3	protein_coding	-1	c.-2828C>T
1	113294430	C	T	PASS	T	upstream_gene_variant	MODIFIER	HIPK4	476458	transcript	XM_533668.5	protein_coding	-1	c.-2828C>T
1	113294430	C	T	PASS	T	downstream_gene_variant	MODIFIER	PRX	484501	transcript	XM_541615.5	protein_coding	-1	c.*591C>T
1	113294430	C	T	PASS	T	intergenic_region	MODIFIER	PRX-HIPK4	484501-476458	intergenic_region	484501-476458		-1	n.113294430C>T
1	113446195	C	T	PASS	T	intergenic_region	MODIFIER	MAP3K10-LOC100684414	484504-100684414	intergenic_region	484504-100684414		-1	n.113446195C>T
1	113570498	C	T	PASS	T	intergenic_region	MODIFIER	PSMC4-FCGBP	100855613-484505	intergenic_region	100855613-484505		-1	n.113570498C>T
1	113726359	G	A	PASS	A	downstream_gene_variant	MODIFIER	SELENOV	100303414	transcript	XM_022425729.1	protein_coding	-1	c.*840C>T
1	113726359	G	A	PASS	A	intron_variant	MODIFIER	SELENOV	100303414	transcript	XM_022425723.1	protein_coding	5	c.1493+844C>T
1	113726359	G	A	PASS	A	intron_variant	MODIFIER	SELENOV	100303414	transcript	XM_005616586.3	protein_coding	5	c.1493+844C>T
1	113726359	G	A	PASS	A	intron_variant	MODIFIER	SELENOV	100303414	transcript	XR_002631684.1	pseudogene	5	n.1616+814C>T
1	113726359	G	A	PASS	A	intron_variant	MODIFIER	SELENOV	100303414	transcript	XM_022425725.1	protein_coding	5	c.*26+814C>T
1	113731781	T	TG	PASS	TG	upstream_gene_variant	MODIFIER	SELENOV	100303414	transcript	XM_022425723.1	protein_coding	-1	c.-1280_-1279insC
1	113731781	T	TG	PASS	TG	upstream_gene_variant	MODIFIER	SELENOV	100303414	transcript	XM_005616586.3	protein_coding	-1	c.-1280_-1279insC
1	113731781	T	TG	PASS	TG	upstream_gene_variant	MODIFIER	SELENOV	100303414	transcript	XR_002631684.1	pseudogene	-1	n.-1187_-1186insC
1	113731781	T	TG	PASS	TG	upstream_gene_variant	MODIFIER	SELENOV	100303414	transcript	XM_022425725.1	protein_coding	-1	c.-1280_-1279insC
1	113731781	T	TG	PASS	TG	upstream_gene_variant	MODIFIER	SELENOV	100303414	transcript	XM_022425729.1	protein_coding	-1	c.-1280_-1279insC
1	113731781	T	TG	PASS	TG	intergenic_region	MODIFIER	SELENOV-DLL3	100303414-484508	intergenic_region	100303414-484508		-1	n.113731781_113731782insG
1	113795347	G	A	PASS	A	5_prime_UTR_variant	MODIFIER	RPS16	476463	transcript	XM_005616591.3	protein_coding	1	c.-6G>A
1	113795347	G	A	PASS	A	upstream_gene_variant	MODIFIER	IL-15L	103611085	transcript	XM_014120506.2	protein_coding	-1	c.-1963C>T
1	113795347	G	A	PASS	A	upstream_gene_variant	MODIFIER	IL-15L	103611085	transcript	XM_014120507.2	protein_coding	-1	c.-1963C>T
1	113795347	G	A	PASS	A	downstream_gene_variant	MODIFIER	LOC106559902	106559902	transcript	XR_002631691.1	pseudogene	-1	n.*1664G>A
1	113795347	G	A	PASS	A	downstream_gene_variant	MODIFIER	LOC106559902	106559902	transcript	XR_001318018.2	pseudogene	-1	n.*1591G>A
1	114051567	C	T	PASS	T	intron_variant	MODIFIER	PAK4	484513	transcript	XM_862148.5	protein_coding	1	c.-130+344G>A
1	114051567	C	T	PASS	T	intron_variant	MODIFIER	PAK4	484513	transcript	XM_541627.6	protein_coding	1	c.-130+344G>A
1	114072278	A	T	PASS	T	intron_variant	MODIFIER	ACP7	484514	transcript	XM_005616604.3	protein_coding	2	c.113-2706T>A
1	114072278	A	T	PASS	T	intron_variant	MODIFIER	ACP7	484514	transcript	XM_541628.5	protein_coding	2	c.113-2706T>A
1	114294604	C	T	PASS	T	downstream_gene_variant	MODIFIER	LGALS4	484521	transcript	XM_533678.6	protein_coding	-1	c.*3595C>T
1	114294604	C	T	PASS	T	intron_variant	MODIFIER	LGALS4	484521	transcript	XM_022422481.1	protein_coding	10	c.1029-134C>T
1	114294604	C	T	PASS	T	intron_variant	MODIFIER	LGALS4	484521	transcript	XM_022422490.1	protein_coding	10	c.717-134C>T
1	114294604	C	T	PASS	T	intron_variant	MODIFIER	LGALS4	484521	transcript	NM_001284470.1	protein_coding	2	c.135-134C>T
1	114375771	T	G	PASS	G	intron_variant	MODIFIER	ACTN4	484526	transcript	XM_005616611.3	protein_coding	6	c.652-133A>C
1	114375771	T	G	PASS	G	intron_variant	MODIFIER	ACTN4	484526	transcript	XM_848317.5	protein_coding	6	c.652-133A>C
1	114375771	T	G	PASS	G	intron_variant	MODIFIER	ACTN4	484526	transcript	XM_541640.6	protein_coding	6	c.652-133A>C
1	114375771	T	G	PASS	G	intron_variant	MODIFIER	ACTN4	484526	transcript	XM_862275.5	protein_coding	6	c.652-133A>C
1	114375771	T	G	PASS	G	intron_variant	MODIFIER	ACTN4	484526	transcript	XM_862326.5	protein_coding	6	c.652-133A>C
1	114617636	G	A	PASS	A	missense_variant	MODERATE	GGN	612577	transcript	XM_014120664.2	protein_coding	2	c.1621G>A	p.Ala541Thr
1	114617636	G	A	PASS	A	upstream_gene_variant	MODIFIER	SPRED3	612575	transcript	XM_005616622.3	protein_coding	-1	c.-4975C>T
1	114617636	G	A	PASS	A	upstream_gene_variant	MODIFIER	SPRED3	612575	transcript	XM_022425947.1	protein_coding	-1	c.-4975C>T
1	114617636	G	A	PASS	A	upstream_gene_variant	MODIFIER	SPRED3	612575	transcript	XM_005616623.2	protein_coding	-1	c.-5185C>T
1	114617636	G	A	PASS	A	upstream_gene_variant	MODIFIER	SPRED3	612575	transcript	XM_022425951.1	protein_coding	-1	c.-5185C>T
1	114617636	G	A	PASS	A	upstream_gene_variant	MODIFIER	SPRED3	612575	transcript	XM_850307.4	protein_coding	-1	c.-5185C>T
1	114617636	G	A	PASS	A	downstream_gene_variant	MODIFIER	PSMD8	476470	transcript	XM_533681.6	protein_coding	-1	c.*2254C>T
1	114855009	T	A	PASS	A	intron_variant	MODIFIER	SIPA1L3	612583	transcript	XM_014116099.1	protein_coding	5	c.1627-1847A>T
1	115130084	A	ACGATTTTCCTTTTTTTTTTTTTTTTTTTTTTTTTTTTTTTTTTTTTTTTTTTTTTTTT	PASS	ACGATTTTCCTTTTTTTTTTTTTTTTTTTTTTTTTTTTTTTTTTTTTTTTTTTTTTTTT	intron_variant	MODIFIER	LOC100686288	100686288	transcript	XM_022404130.1	protein_coding	3	c.38-5480_38-5479insAAAAAAAAAAAAAAAAAAAAAAAAAAAAAAAAAAAAAAAAAAAAAAAAAGGAAAATCG
1	116802815	C	T	PASS	T	intron_variant	MODIFIER	NPHS1	484571	transcript	XM_541685.6	protein_coding	17	c.2493+96C>T
1	116802815	C	T	PASS	T	intron_variant	MODIFIER	NPHS1	484571	transcript	XM_022403537.1	protein_coding	17	c.2493+96C>T
1	116802815	C	T	PASS	T	intron_variant	MODIFIER	NPHS1	484571	transcript	XM_005616692.3	protein_coding	17	c.2457+96C>T
1	116802815	C	T	PASS	T	intron_variant	MODIFIER	NPHS1	484571	transcript	XM_022403540.1	protein_coding	14	c.1812+96C>T
1	122594863	AAGGAAGGAAGAAAGAAAGAGAAAGAG	A	PASS	A	upstream_gene_variant	MODIFIER	LOC111090843	111090843	transcript	XR_002615645.1	pseudogene	-1	n.-1454_-1429delAGGAAGGAAGAAAGAAAGAGAAAGAG
1	122594863	AAGGAAGGAAGAAAGAAAGAGAAAGAG	A	PASS	A	intergenic_region	MODIFIER	LOC111098499-LOC111090843	111098499-111090843	intergenic_region	111098499-111090843		-1	n.122594864_122594889delAGGAAGGAAGAAAGAAAGAGAAAGAG
10	2505494	G	A	PASS	A	intron_variant	MODIFIER	LOC111097578	111097578	transcript	XR_002630394.1	pseudogene	2	n.204+13690G>A
10	2505494	G	A	PASS	A	intron_variant	MODIFIER	LOC111097578	111097578	transcript	XR_002630395.1	pseudogene	2	n.204+13690G>A
10	8938080	G	A	PASS	A	intron_variant	MODIFIER	GRIP1	474434	transcript	XM_022424173.1	protein_coding	5	c.647-1185C>T
10	8938080	G	A	PASS	A	intron_variant	MODIFIER	GRIP1	474434	transcript	XM_022424185.1	protein_coding	3	c.251-1185C>T
10	8938080	G	A	PASS	A	intron_variant	MODIFIER	GRIP1	474434	transcript	XM_022424182.1	protein_coding	4	c.251-1185C>T
10	8938080	G	A	PASS	A	intron_variant	MODIFIER	GRIP1	474434	transcript	XM_022424184.1	protein_coding	5	c.251-1185C>T
10	8938080	G	A	PASS	A	intron_variant	MODIFIER	GRIP1	474434	transcript	XM_022424176.1	protein_coding	6	c.647-1185C>T
10	8938080	G	A	PASS	A	intron_variant	MODIFIER	GRIP1	474434	transcript	XM_022424174.1	protein_coding	6	c.647-1185C>T
10	8938080	G	A	PASS	A	intron_variant	MODIFIER	GRIP1	474434	transcript	XM_022424175.1	protein_coding	6	c.647-1185C>T
10	8938080	G	A	PASS	A	intron_variant	MODIFIER	GRIP1	474434	transcript	XM_022424178.1	protein_coding	6	c.647-1185C>T
10	8938080	G	A	PASS	A	intron_variant	MODIFIER	GRIP1	474434	transcript	XM_022424180.1	protein_coding	6	c.647-1185C>T
10	8938080	G	A	PASS	A	intron_variant	MODIFIER	GRIP1	474434	transcript	XM_022424183.1	protein_coding	5	c.251-1185C>T
10	8938080	G	A	PASS	A	intron_variant	MODIFIER	GRIP1	474434	transcript	XM_022424179.1	protein_coding	6	c.647-1185C>T
10	8938080	G	A	PASS	A	intron_variant	MODIFIER	GRIP1	474434	transcript	XM_022424177.1	protein_coding	6	c.647-1185C>T
10	8938080	G	A	PASS	A	intron_variant	MODIFIER	GRIP1	474434	transcript	XM_014117215.2	protein_coding	4	c.584-1185C>T
10	8938080	G	A	PASS	A	intron_variant	MODIFIER	GRIP1	474434	transcript	XM_014117217.2	protein_coding	4	c.497-1185C>T
10	8938080	G	A	PASS	A	intron_variant	MODIFIER	GRIP1	474434	transcript	XM_022424181.1	protein_coding	6	c.647-1185C>T
10	8938080	G	A	PASS	A	intron_variant	MODIFIER	GRIP1	474434	transcript	XM_022424186.1	protein_coding	6	c.647-1185C>T
10	10685192	G	GT	PASS	GT	intron_variant	MODIFIER	LOC111097592	111097592	transcript	XR_002630447.1	pseudogene	1	n.558+10905_558+10906insA
10	50519594	C	G	PASS	G	intron_variant	MODIFIER	GTF2A1L	100534007	transcript	XM_022423974.1	protein_coding	6	c.1138-4752C>G
10	50519594	C	G	PASS	G	intron_variant	MODIFIER	GTF2A1L	100534007	transcript	NM_001204843.1	protein_coding	6	c.976-4752C>G
10	51747038	G	A	PASS	A	intron_variant	MODIFIER	NRXN1	474589	transcript	XM_022424706.1	protein_coding	18	c.3574-25839C>T
10	51747038	G	A	PASS	A	intron_variant	MODIFIER	NRXN1	474589	transcript	XM_005626094.2	protein_coding	18	c.3574-25839C>T
10	51747038	G	A	PASS	A	intron_variant	MODIFIER	NRXN1	474589	transcript	XM_022424709.1	protein_coding	17	c.3547-25839C>T
10	51747038	G	A	PASS	A	intron_variant	MODIFIER	NRXN1	474589	transcript	XM_014117522.2	protein_coding	18	c.3571-25839C>T
10	51747038	G	A	PASS	A	intron_variant	MODIFIER	NRXN1	474589	transcript	XM_014117523.2	protein_coding	17	c.3556-25839C>T
10	51747038	G	A	PASS	A	intron_variant	MODIFIER	NRXN1	474589	transcript	XM_014117524.2	protein_coding	16	c.3544-25839C>T
10	51747038	G	A	PASS	A	intron_variant	MODIFIER	NRXN1	474589	transcript	XM_014117525.2	protein_coding	15	c.3514-25839C>T
10	51747038	G	A	PASS	A	intron_variant	MODIFIER	NRXN1	474589	transcript	XM_022424707.1	protein_coding	17	c.3562-25839C>T
10	51747038	G	A	PASS	A	intron_variant	MODIFIER	NRXN1	474589	transcript	XM_022424708.1	protein_coding	17	c.3550-25839C>T
10	51747038	G	A	PASS	A	intron_variant	MODIFIER	NRXN1	474589	transcript	XM_022424727.1	protein_coding	13	c.3460-25839C>T
10	51747038	G	A	PASS	A	intron_variant	MODIFIER	NRXN1	474589	transcript	XM_022424728.1	protein_coding	13	c.3460-25839C>T
10	51747038	G	A	PASS	A	intron_variant	MODIFIER	NRXN1	474589	transcript	XM_022424723.1	protein_coding	2	c.436-25839C>T
10	51747038	G	A	PASS	A	intron_variant	MODIFIER	NRXN1	474589	transcript	XM_022424724.1	protein_coding	2	c.436-25839C>T
10	51747038	G	A	PASS	A	intron_variant	MODIFIER	NRXN1	474589	transcript	XM_859844.5	protein_coding	2	c.436-25839C>T
10	51747038	G	A	PASS	A	intron_variant	MODIFIER	NRXN1	474589	transcript	XM_022424722.1	protein_coding	2	c.436-25839C>T
10	51747038	G	A	PASS	A	intron_variant	MODIFIER	NRXN1	474589	transcript	XM_005626098.2	protein_coding	17	c.3547-25839C>T
10	51747038	G	A	PASS	A	intron_variant	MODIFIER	NRXN1	474589	transcript	XM_005626100.2	protein_coding	16	c.3523-25839C>T
10	51747038	G	A	PASS	A	intron_variant	MODIFIER	NRXN1	474589	transcript	XM_005626101.2	protein_coding	15	c.3511-25839C>T
10	51747038	G	A	PASS	A	intron_variant	MODIFIER	NRXN1	474589	transcript	XM_022424710.1	protein_coding	17	c.3544-25839C>T
10	51747038	G	A	PASS	A	intron_variant	MODIFIER	NRXN1	474589	transcript	XM_022424711.1	protein_coding	17	c.3547-25839C>T
10	51747038	G	A	PASS	A	intron_variant	MODIFIER	NRXN1	474589	transcript	XM_022424712.1	protein_coding	16	c.3535-25839C>T
10	51747038	G	A	PASS	A	intron_variant	MODIFIER	NRXN1	474589	transcript	XM_022424713.1	protein_coding	16	c.3523-25839C>T
10	51747038	G	A	PASS	A	intron_variant	MODIFIER	NRXN1	474589	transcript	XM_022424714.1	protein_coding	16	c.3520-25839C>T
10	51747038	G	A	PASS	A	intron_variant	MODIFIER	NRXN1	474589	transcript	XM_022424715.1	protein_coding	18	c.3574-25839C>T
10	51747038	G	A	PASS	A	intron_variant	MODIFIER	NRXN1	474589	transcript	XM_022424716.1	protein_coding	16	c.3520-25839C>T
10	51747038	G	A	PASS	A	intron_variant	MODIFIER	NRXN1	474589	transcript	XM_022424717.1	protein_coding	15	c.3496-25839C>T
10	51747038	G	A	PASS	A	intron_variant	MODIFIER	NRXN1	474589	transcript	XM_022424718.1	protein_coding	13	c.3466-25839C>T
10	51747038	G	A	PASS	A	intron_variant	MODIFIER	NRXN1	474589	transcript	XM_022424719.1	protein_coding	12	c.3436-25839C>T
10	51747038	G	A	PASS	A	intron_variant	MODIFIER	NRXN1	474589	transcript	XM_022424720.1	protein_coding	12	c.3436-25839C>T
10	51747038	G	A	PASS	A	intron_variant	MODIFIER	NRXN1	474589	transcript	XM_531818.5	protein_coding	17	c.3547-25839C>T
10	60580035	C	T	PASS	T	upstream_gene_variant	MODIFIER	LOC102154951	102154951	transcript	XR_293453.3	pseudogene	-1	n.-105G>A
10	60580035	C	T	PASS	T	upstream_gene_variant	MODIFIER	LOC102154951	102154951	transcript	XR_002630879.1	pseudogene	-1	n.-109G>A
10	60580035	C	T	PASS	T	intergenic_region	MODIFIER	LOC102154951-BCL11A	102154951-481381	intergenic_region	102154951-481381		-1	n.60580035C>T
10	68420285	C	T	PASS	T	intron_variant	MODIFIER	ANXA4	606756	transcript	XM_022424009.1	protein_coding	1	c.-53+1586C>T
10	68608487	C	A	PASS	A	intergenic_region	MODIFIER	ASPRV1-LOC106559441	481416-106559441	intergenic_region	481416-106559441		-1	n.68608487C>A
10	69041869	G	GGGGGT	PASS	GGGGGT	intron_variant	MODIFIER	LOC102155304	102155304	transcript	XM_005626258.1	protein_coding	1	c.60+1605_60+1606insGGGGT
11	71102	C	T	PASS	T	intergenic_region	MODIFIER	CHR_START-MGAT1	CHR_START-491674	intergenic_region	CHR_START-491674		-1	n.71102C>T
11	2785886	G	T	PASS	T	intron_variant	MODIFIER	LOC111097967	111097967	transcript	XM_022425041.1	protein_coding	3	c.403-3008G>T
11	9572600	C	T	PASS	T	intergenic_region	MODIFIER	LOC102155120-LOC111097996	102155120-111097996	intergenic_region	102155120-111097996		-1	n.9572600C>T
11	11023956	G	A	PASS	A	intron_variant	MODIFIER	LOC102151636	102151636	transcript	XM_022425180.1	protein_coding	8	c.836-85281C>T
11	11023956	G	A	PASS	A	intron_variant	MODIFIER	LOC608488	608488	transcript	XM_022425038.1	protein_coding	4	c.447+6834G>A
11	11023956	G	A	PASS	A	intron_variant	MODIFIER	LOC102151636	102151636	transcript	XM_022425182.1	protein_coding	7	c.746-85281C>T
11	11023956	G	A	PASS	A	intron_variant	MODIFIER	LOC102151636	102151636	transcript	XM_022425181.1	protein_coding	8	c.836-85281C>T
11	12962452	A	AT	PASS	AT	intron_variant	MODIFIER	PRDM6	100687856	transcript	XM_014117973.2	protein_coding	4	c.663+9061_663+9062insT
11	12986666	T	TTCTTTCTTTCTTTCTTTCTTTCTGTCTTTCTTTC	PASS	TTCTTTCTTTCTTTCTTTCTTTCTGTCTTTCTTTC	intron_variant	MODIFIER	PRDM6	100687856	transcript	XM_014117973.2	protein_coding	4	c.664-27080_664-27079insTCTTTCTTTCTTTCTTTCTTTCTGTCTTTCTTTC
11	13041176	T	TAAAAAAAAAAAAAAAAAAAAAAAAAAAAAAAAA	PASS	TAAAAAAAAAAAAAAAAAAAAAAAAAAAAAAAAA	intron_variant	MODIFIER	PRDM6	100687856	transcript	XM_014117973.2	protein_coding	8	c.1437-3240_1437-3239insAAAAAAAAAAAAAAAAAAAAAAAAAAAAAAAAA
11	16092319	G	GGGATCCC	PASS	GGGATCCC	intron_variant	MODIFIER	2021-03-03	481488	transcript	XM_538609.6	protein_coding	3	c.394-7729_394-7728insGGGATCC
11	21021680	T	C	PASS	C	intron_variant	MODIFIER	KIF3A	474675	transcript	XM_855769.5	protein_coding	4	c.511-2959A>G
11	21021680	T	C	PASS	C	intron_variant	MODIFIER	KIF3A	474675	transcript	XM_022425273.1	protein_coding	4	c.511-2959A>G
11	21021680	T	C	PASS	C	intron_variant	MODIFIER	KIF3A	474675	transcript	XM_022425274.1	protein_coding	4	c.511-2959A>G
11	43888178	G	A	PASS	A	intergenic_region	MODIFIER	LOC100685742-LOC111097906	100685742-111097906	intergenic_region	100685742-111097906		-1	n.43888178G>A
11	57286197	G	A	PASS	A	intergenic_region	MODIFIER	LOC481631-LOC612942	481631-612942	intergenic_region	481631-612942		-1	n.57286197G>A
11	59049944	A	G	PASS	G	intergenic_region	MODIFIER	LOC111097954-CYLC2	111097954-100856754	intergenic_region	111097954-100856754		-1	n.59049944A>G
11	59049965	A	C	PASS	C	intergenic_region	MODIFIER	LOC111097954-CYLC2	111097954-100856754	intergenic_region	111097954-100856754		-1	n.59049965A>C
12	860146	C	T	PASS	T	downstream_gene_variant	MODIFIER	TCF19	474835	transcript	XM_022425831.1	protein_coding	-1	c.*1564C>T
12	860146	C	T	PASS	T	downstream_gene_variant	MODIFIER	POU5F1	481709	transcript	XM_538830.3	protein_coding	-1	c.*1228G>A
12	860146	C	T	PASS	T	downstream_gene_variant	MODIFIER	TCF19	474835	transcript	XM_532065.6	protein_coding	-1	c.*1564C>T
12	860146	C	T	PASS	T	intergenic_region	MODIFIER	TCF19-POU5F1	474835-481709	intergenic_region	474835-481709		-1	n.860146C>T
12	873946	G	A	PASS	A	intron_variant	MODIFIER	LOC111098210	111098210	transcript	XR_002631751.1	pseudogene	1	n.803-107C>T
12	873946	G	A	PASS	A	intron_variant	MODIFIER	LOC111098210	111098210	transcript	XR_002631752.1	pseudogene	1	n.592-107C>T
12	996728	G	A	PASS	A	upstream_gene_variant	MODIFIER	LOC100685118	100685118	transcript	100685118	pseudogene	-1	n.-1326C>T
12	996728	G	A	PASS	A	intron_variant	MODIFIER	LOC106559562	106559562	transcript	XR_002631756.1	pseudogene	1	n.453-8199C>T
12	1131001	G	A	PASS	A	synonymous_variant	LOW	BAG6	474842	transcript	XM_022425835.1	protein_coding	14	c.1767C>T	p.Ser589Ser
12	1131001	G	A	PASS	A	synonymous_variant	LOW	BAG6	474842	transcript	XM_022425836.1	protein_coding	14	c.1767C>T	p.Ser589Ser
12	1131001	G	A	PASS	A	synonymous_variant	LOW	BAG6	474842	transcript	XM_022425838.1	protein_coding	14	c.1767C>T	p.Ser589Ser
12	1131001	G	A	PASS	A	synonymous_variant	LOW	BAG6	474842	transcript	XM_014118309.2	protein_coding	14	c.1725C>T	p.Ser575Ser
12	1131001	G	A	PASS	A	synonymous_variant	LOW	BAG6	474842	transcript	XM_014118312.2	protein_coding	13	c.1671C>T	p.Ser557Ser
12	1131001	G	A	PASS	A	synonymous_variant	LOW	BAG6	474842	transcript	XM_014118313.2	protein_coding	13	c.1614C>T	p.Ser538Ser
12	1131001	G	A	PASS	A	synonymous_variant	LOW	BAG6	474842	transcript	XM_014118315.2	protein_coding	12	c.1563C>T	p.Ser521Ser
12	1131001	G	A	PASS	A	synonymous_variant	LOW	BAG6	474842	transcript	XM_014118316.2	protein_coding	13	c.1617C>T	p.Ser539Ser
12	1131001	G	A	PASS	A	synonymous_variant	LOW	BAG6	474842	transcript	XM_014118317.2	protein_coding	13	c.1614C>T	p.Ser538Ser
12	1131001	G	A	PASS	A	synonymous_variant	LOW	BAG6	474842	transcript	XM_022425839.1	protein_coding	14	c.1764C>T	p.Ser588Ser
12	1131001	G	A	PASS	A	synonymous_variant	LOW	BAG6	474842	transcript	XM_022425840.1	protein_coding	14	c.1764C>T	p.Ser588Ser
12	1131001	G	A	PASS	A	synonymous_variant	LOW	BAG6	474842	transcript	XM_022425844.1	protein_coding	13	c.1659C>T	p.Ser553Ser
12	1131001	G	A	PASS	A	synonymous_variant	LOW	BAG6	474842	transcript	XM_022425845.1	protein_coding	13	c.1656C>T	p.Ser552Ser
12	1131001	G	A	PASS	A	synonymous_variant	LOW	BAG6	474842	transcript	XM_854174.5	protein_coding	13	c.1617C>T	p.Ser539Ser
12	1131001	G	A	PASS	A	synonymous_variant	LOW	BAG6	474842	transcript	XM_005627148.3	protein_coding	13	c.1668C>T	p.Ser556Ser
12	1131001	G	A	PASS	A	synonymous_variant	LOW	BAG6	474842	transcript	XM_022425841.1	protein_coding	14	c.1764C>T	p.Ser588Ser
12	1131001	G	A	PASS	A	synonymous_variant	LOW	BAG6	474842	transcript	XM_022425842.1	protein_coding	13	c.1713C>T	p.Ser571Ser
12	1131001	G	A	PASS	A	synonymous_variant	LOW	BAG6	474842	transcript	XM_022425843.1	protein_coding	13	c.1710C>T	p.Ser570Ser
12	1131001	G	A	PASS	A	synonymous_variant	LOW	BAG6	474842	transcript	XM_022425846.1	protein_coding	14	c.1767C>T	p.Ser589Ser
12	1131001	G	A	PASS	A	synonymous_variant	LOW	BAG6	474842	transcript	XM_022425847.1	protein_coding	10	c.1281C>T	p.Ser427Ser
12	1131001	G	A	PASS	A	synonymous_variant	LOW	BAG6	474842	transcript	XM_022425837.1	protein_coding	14	c.1767C>T	p.Ser589Ser
12	1369050	C	T	PASS	T	intron_variant	MODIFIER	C2	474853	transcript	XM_022425858.1	protein_coding	1	c.34+5214C>T
12	1369050	C	T	PASS	T	intron_variant	MODIFIER	C2	474853	transcript	XM_022425859.1	protein_coding	1	c.34+5214C>T
12	1411804	C	A	PASS	A	missense_variant	MODERATE	NELFE	474854	transcript	XM_005627169.3	protein_coding	3	c.7G>T	p.Val3Leu
12	1411804	C	A	PASS	A	missense_variant	MODERATE	NELFE	474854	transcript	XM_022425860.1	protein_coding	3	c.7G>T	p.Val3Leu
12	1411804	C	A	PASS	A	missense_variant	MODERATE	NELFE	474854	transcript	XM_532087.6	protein_coding	2	c.7G>T	p.Val3Leu
12	1411804	C	A	PASS	A	upstream_gene_variant	MODIFIER	SKIV2L	481720	transcript	XM_538841.6	protein_coding	-1	c.-736C>A
12	1424771	C	T	PASS	T	synonymous_variant	LOW	DXO	100855833	transcript	XM_014118345.2	protein_coding	6	c.918G>A	p.Glu306Glu
12	1424771	C	T	PASS	T	upstream_gene_variant	MODIFIER	STK19	100856288	transcript	XM_003639409.4	protein_coding	-1	c.-1680C>T
12	1424771	C	T	PASS	T	downstream_gene_variant	MODIFIER	SKIV2L	481720	transcript	XM_538841.6	protein_coding	-1	c.*305C>T
12	1440449	A	T	PASS	T	intron_variant	MODIFIER	LOC481722	481722	transcript	XM_022425780.1	protein_coding	22	c.2827-44A>T
12	1440465	T	A	PASS	A	intron_variant	MODIFIER	LOC481722	481722	transcript	XM_022425780.1	protein_coding	22	c.2827-28T>A
12	1445707	A	AC	PASS	AC	upstream_gene_variant	MODIFIER	CYP21A2	415124	transcript	NM_001003335.1	protein_coding	-1	c.-5033_-5032insC
12	1445707	A	AC	PASS	AC	intron_variant	MODIFIER	LOC481722	481722	transcript	XM_022425780.1	protein_coding	36	c.4608+754_4608+755insC
12	1492547	C	T	PASS	T	upstream_gene_variant	MODIFIER	TNXB	100682877	transcript	XM_022425864.1	protein_coding	-1	c.-2398G>A
12	1492547	C	T	PASS	T	intron_variant	MODIFIER	TNXB	100682877	transcript	XM_003431680.4	protein_coding	7	c.2770+693G>A
12	1492547	C	T	PASS	T	intron_variant	MODIFIER	TNXB	100682877	transcript	XM_005627170.3	protein_coding	7	c.2770+693G>A
12	1492547	C	T	PASS	T	intron_variant	MODIFIER	TNXB	100682877	transcript	XM_014118347.2	protein_coding	7	c.2770+693G>A
12	1492547	C	T	PASS	T	intron_variant	MODIFIER	TNXB	100682877	transcript	XM_014118348.2	protein_coding	7	c.2770+693G>A
12	1492547	C	T	PASS	T	intron_variant	MODIFIER	TNXB	100682877	transcript	XM_014118349.2	protein_coding	7	c.2770+693G>A
12	1492547	C	T	PASS	T	intron_variant	MODIFIER	TNXB	100682877	transcript	XM_014118350.2	protein_coding	7	c.2770+693G>A
12	1492547	C	T	PASS	T	intron_variant	MODIFIER	TNXB	100682877	transcript	XM_022425861.1	protein_coding	7	c.2770+693G>A
12	1492547	C	T	PASS	T	intron_variant	MODIFIER	TNXB	100682877	transcript	XM_022425862.1	protein_coding	7	c.2770+693G>A
12	1492547	C	T	PASS	T	intron_variant	MODIFIER	TNXB	100682877	transcript	XM_022425863.1	protein_coding	7	c.2770+693G>A
12	1492547	C	T	PASS	T	intron_variant	MODIFIER	TNXB	100682877	transcript	XM_005627171.3	protein_coding	7	c.2770+693G>A
12	1570457	A	C	PASS	C	upstream_gene_variant	MODIFIER	AGPAT1	474857	transcript	XM_005627177.3	protein_coding	-1	c.-5689T>G
12	1570457	A	C	PASS	C	upstream_gene_variant	MODIFIER	RNF5	474858	transcript	XM_532092.6	protein_coding	-1	c.-994A>C
12	1570457	A	C	PASS	C	upstream_gene_variant	MODIFIER	AGPAT1	474857	transcript	XM_022425868.1	protein_coding	-1	c.-5689T>G
12	1570457	A	C	PASS	C	upstream_gene_variant	MODIFIER	AGPAT1	474857	transcript	XM_005627180.3	protein_coding	-1	c.-5689T>G
12	1570457	A	C	PASS	C	upstream_gene_variant	MODIFIER	RNF5	474858	transcript	XM_022425869.1	protein_coding	-1	c.-994A>C
12	1570457	A	C	PASS	C	upstream_gene_variant	MODIFIER	RNF5	474858	transcript	XM_005627175.3	protein_coding	-1	c.-1080A>C
12	1570457	A	C	PASS	C	downstream_gene_variant	MODIFIER	AGER	403168	transcript	NM_001048081.2	protein_coding	-1	c.*3966T>G
12	1570457	A	C	PASS	C	downstream_gene_variant	MODIFIER	AGER	403168	transcript	XR_293655.3	pseudogene	-1	n.*3886T>G
12	1570457	A	C	PASS	C	intron_variant	MODIFIER	AGPAT1	474857	transcript	XM_005627178.3	protein_coding	1	c.-10+44T>G
12	1651373	C	T	PASS	T	intergenic_region	MODIFIER	LOC481727-LOC111098215	481727-111098215	intergenic_region	481727-111098215		-1	n.1651373C>T
12	1701230	CT	C	PASS	C	intergenic_region	MODIFIER	LOC481727-LOC111098215	481727-111098215	intergenic_region	481727-111098215		-1	n.1701231delT
12	1802546	G	A	PASS	A	intron_variant	MODIFIER	C12H6orf10	102152239	transcript	XM_022425913.1	protein_coding	34	c.808+9132C>T
12	1826781	C	T	PASS	T	downstream_gene_variant	MODIFIER	C12H6orf10	102152239	transcript	XM_022425872.1	protein_coding	-1	c.*2133G>A
12	1826781	C	T	PASS	T	downstream_gene_variant	MODIFIER	C12H6orf10	102152239	transcript	XM_022425916.1	protein_coding	-1	c.*2133G>A
12	1826781	C	T	PASS	T	downstream_gene_variant	MODIFIER	C12H6orf10	102152239	transcript	XM_022425917.1	protein_coding	-1	c.*2133G>A
12	1826781	C	T	PASS	T	downstream_gene_variant	MODIFIER	C12H6orf10	102152239	transcript	XM_022425914.1	protein_coding	-1	c.*2133G>A
12	1826781	C	T	PASS	T	downstream_gene_variant	MODIFIER	C12H6orf10	102152239	transcript	XM_022425881.1	protein_coding	-1	c.*2133G>A
12	1826781	C	T	PASS	T	downstream_gene_variant	MODIFIER	C12H6orf10	102152239	transcript	XM_022425882.1	protein_coding	-1	c.*2133G>A
12	1826781	C	T	PASS	T	downstream_gene_variant	MODIFIER	C12H6orf10	102152239	transcript	XM_022425873.1	protein_coding	-1	c.*2133G>A
12	1826781	C	T	PASS	T	downstream_gene_variant	MODIFIER	C12H6orf10	102152239	transcript	XM_022425877.1	protein_coding	-1	c.*2133G>A
12	1826781	C	T	PASS	T	downstream_gene_variant	MODIFIER	C12H6orf10	102152239	transcript	XM_022425893.1	protein_coding	-1	c.*2133G>A
12	1826781	C	T	PASS	T	downstream_gene_variant	MODIFIER	C12H6orf10	102152239	transcript	XM_022425883.1	protein_coding	-1	c.*2133G>A
12	1826781	C	T	PASS	T	downstream_gene_variant	MODIFIER	C12H6orf10	102152239	transcript	XM_022425888.1	protein_coding	-1	c.*2133G>A
12	1826781	C	T	PASS	T	downstream_gene_variant	MODIFIER	C12H6orf10	102152239	transcript	XM_022425892.1	protein_coding	-1	c.*2133G>A
12	1826781	C	T	PASS	T	downstream_gene_variant	MODIFIER	C12H6orf10	102152239	transcript	XM_022425894.1	protein_coding	-1	c.*2133G>A
12	1826781	C	T	PASS	T	downstream_gene_variant	MODIFIER	C12H6orf10	102152239	transcript	XM_022425895.1	protein_coding	-1	c.*2133G>A
12	1826781	C	T	PASS	T	downstream_gene_variant	MODIFIER	C12H6orf10	102152239	transcript	XM_022425896.1	protein_coding	-1	c.*2133G>A
12	1826781	C	T	PASS	T	downstream_gene_variant	MODIFIER	C12H6orf10	102152239	transcript	XM_022425897.1	protein_coding	-1	c.*2133G>A
12	1826781	C	T	PASS	T	downstream_gene_variant	MODIFIER	C12H6orf10	102152239	transcript	XM_022425900.1	protein_coding	-1	c.*2133G>A
12	1826781	C	T	PASS	T	downstream_gene_variant	MODIFIER	C12H6orf10	102152239	transcript	XM_022425903.1	protein_coding	-1	c.*2133G>A
12	1826781	C	T	PASS	T	downstream_gene_variant	MODIFIER	C12H6orf10	102152239	transcript	XM_022425904.1	protein_coding	-1	c.*2133G>A
12	1826781	C	T	PASS	T	downstream_gene_variant	MODIFIER	C12H6orf10	102152239	transcript	XM_022425905.1	protein_coding	-1	c.*2133G>A
12	1826781	C	T	PASS	T	downstream_gene_variant	MODIFIER	C12H6orf10	102152239	transcript	XM_022425912.1	protein_coding	-1	c.*2133G>A
12	1826781	C	T	PASS	T	downstream_gene_variant	MODIFIER	C12H6orf10	102152239	transcript	XM_022425880.1	protein_coding	-1	c.*2133G>A
12	1826781	C	T	PASS	T	downstream_gene_variant	MODIFIER	C12H6orf10	102152239	transcript	XM_022425885.1	protein_coding	-1	c.*2133G>A
12	1826781	C	T	PASS	T	downstream_gene_variant	MODIFIER	C12H6orf10	102152239	transcript	XM_022425887.1	protein_coding	-1	c.*2133G>A
12	1826781	C	T	PASS	T	downstream_gene_variant	MODIFIER	C12H6orf10	102152239	transcript	XM_022425889.1	protein_coding	-1	c.*2133G>A
12	1826781	C	T	PASS	T	downstream_gene_variant	MODIFIER	C12H6orf10	102152239	transcript	XM_022425891.1	protein_coding	-1	c.*2133G>A
12	1826781	C	T	PASS	T	downstream_gene_variant	MODIFIER	C12H6orf10	102152239	transcript	XM_022425899.1	protein_coding	-1	c.*2133G>A
12	1826781	C	T	PASS	T	downstream_gene_variant	MODIFIER	C12H6orf10	102152239	transcript	XM_022425902.1	protein_coding	-1	c.*2133G>A
12	1826781	C	T	PASS	T	downstream_gene_variant	MODIFIER	C12H6orf10	102152239	transcript	XM_022425907.1	protein_coding	-1	c.*2133G>A
12	1826781	C	T	PASS	T	downstream_gene_variant	MODIFIER	C12H6orf10	102152239	transcript	XM_022425909.1	protein_coding	-1	c.*2133G>A
12	1826781	C	T	PASS	T	downstream_gene_variant	MODIFIER	C12H6orf10	102152239	transcript	XM_022425911.1	protein_coding	-1	c.*2133G>A
12	1826781	C	T	PASS	T	downstream_gene_variant	MODIFIER	C12H6orf10	102152239	transcript	XM_022425879.1	protein_coding	-1	c.*2133G>A
12	1826781	C	T	PASS	T	downstream_gene_variant	MODIFIER	C12H6orf10	102152239	transcript	XM_022425901.1	protein_coding	-1	c.*2133G>A
12	1826781	C	T	PASS	T	downstream_gene_variant	MODIFIER	C12H6orf10	102152239	transcript	XM_022425906.1	protein_coding	-1	c.*2133G>A
12	1826781	C	T	PASS	T	downstream_gene_variant	MODIFIER	C12H6orf10	102152239	transcript	XM_022425910.1	protein_coding	-1	c.*2133G>A
12	1826781	C	T	PASS	T	downstream_gene_variant	MODIFIER	C12H6orf10	102152239	transcript	XM_022425875.1	protein_coding	-1	c.*2133G>A
12	1826781	C	T	PASS	T	downstream_gene_variant	MODIFIER	C12H6orf10	102152239	transcript	XM_022425876.1	protein_coding	-1	c.*2133G>A
12	1826781	C	T	PASS	T	downstream_gene_variant	MODIFIER	C12H6orf10	102152239	transcript	XM_022425878.1	protein_coding	-1	c.*2133G>A
12	1826781	C	T	PASS	T	downstream_gene_variant	MODIFIER	C12H6orf10	102152239	transcript	XM_022425886.1	protein_coding	-1	c.*2133G>A
12	1826781	C	T	PASS	T	downstream_gene_variant	MODIFIER	C12H6orf10	102152239	transcript	XM_022425898.1	protein_coding	-1	c.*2133G>A
12	1826781	C	T	PASS	T	downstream_gene_variant	MODIFIER	C12H6orf10	102152239	transcript	XM_022425874.1	protein_coding	-1	c.*2133G>A
12	1826781	C	T	PASS	T	downstream_gene_variant	MODIFIER	C12H6orf10	102152239	transcript	XM_022425908.1	protein_coding	-1	c.*2133G>A
12	1826781	C	T	PASS	T	downstream_gene_variant	MODIFIER	C12H6orf10	102152239	transcript	XM_022425884.1	protein_coding	-1	c.*2133G>A
12	1826781	C	T	PASS	T	intron_variant	MODIFIER	C12H6orf10	102152239	transcript	XM_022425913.1	protein_coding	33	c.787+7457G>A
12	1826781	C	T	PASS	T	intron_variant	MODIFIER	C12H6orf10	102152239	transcript	XM_022425915.1	protein_coding	33	c.787+7457G>A
12	1826781	C	T	PASS	T	intron_variant	MODIFIER	C12H6orf10	102152239	transcript	XM_022425918.1	protein_coding	31	c.752-15083G>A
12	1844302	C	T	PASS	T	intron_variant	MODIFIER	C12H6orf10	102152239	transcript	XM_022425872.1	protein_coding	31	c.752-9304G>A
12	1844302	C	T	PASS	T	intron_variant	MODIFIER	C12H6orf10	102152239	transcript	XM_022425913.1	protein_coding	31	c.752-9304G>A
12	1844302	C	T	PASS	T	intron_variant	MODIFIER	C12H6orf10	102152239	transcript	XM_022425915.1	protein_coding	31	c.752-9304G>A
12	1844302	C	T	PASS	T	intron_variant	MODIFIER	C12H6orf10	102152239	transcript	XM_022425918.1	protein_coding	31	c.751+9611G>A
12	1844302	C	T	PASS	T	intron_variant	MODIFIER	C12H6orf10	102152239	transcript	XM_022425916.1	protein_coding	11	c.131-9304G>A
12	1844302	C	T	PASS	T	intron_variant	MODIFIER	C12H6orf10	102152239	transcript	XM_022425917.1	protein_coding	10	c.122-9304G>A
12	1844302	C	T	PASS	T	intron_variant	MODIFIER	C12H6orf10	102152239	transcript	XM_022425914.1	protein_coding	12	c.152-9304G>A
12	1844302	C	T	PASS	T	intron_variant	MODIFIER	C12H6orf10	102152239	transcript	XM_022425881.1	protein_coding	30	c.731-9304G>A
12	1844302	C	T	PASS	T	intron_variant	MODIFIER	C12H6orf10	102152239	transcript	XM_022425882.1	protein_coding	30	c.728-9304G>A
12	1844302	C	T	PASS	T	intron_variant	MODIFIER	C12H6orf10	102152239	transcript	XM_022425873.1	protein_coding	31	c.749-9304G>A
12	1844302	C	T	PASS	T	intron_variant	MODIFIER	C12H6orf10	102152239	transcript	XM_022425877.1	protein_coding	30	c.734-9304G>A
12	1844302	C	T	PASS	T	intron_variant	MODIFIER	C12H6orf10	102152239	transcript	XM_022425893.1	protein_coding	29	c.710-9304G>A
12	1844302	C	T	PASS	T	intron_variant	MODIFIER	C12H6orf10	102152239	transcript	XM_022425883.1	protein_coding	30	c.725-9304G>A
12	1844302	C	T	PASS	T	intron_variant	MODIFIER	C12H6orf10	102152239	transcript	XM_022425888.1	protein_coding	29	c.713-9304G>A
12	1844302	C	T	PASS	T	intron_variant	MODIFIER	C12H6orf10	102152239	transcript	XM_022425892.1	protein_coding	29	c.710-9304G>A
12	1844302	C	T	PASS	T	intron_variant	MODIFIER	C12H6orf10	102152239	transcript	XM_022425894.1	protein_coding	29	c.707-9304G>A
12	1844302	C	T	PASS	T	intron_variant	MODIFIER	C12H6orf10	102152239	transcript	XM_022425895.1	protein_coding	29	c.704-9304G>A
12	1844302	C	T	PASS	T	intron_variant	MODIFIER	C12H6orf10	102152239	transcript	XM_022425896.1	protein_coding	29	c.704-9304G>A
12	1844302	C	T	PASS	T	intron_variant	MODIFIER	C12H6orf10	102152239	transcript	XM_022425897.1	protein_coding	29	c.704-9304G>A
12	1844302	C	T	PASS	T	intron_variant	MODIFIER	C12H6orf10	102152239	transcript	XM_022425900.1	protein_coding	28	c.692-9304G>A
12	1844302	C	T	PASS	T	intron_variant	MODIFIER	C12H6orf10	102152239	transcript	XM_022425903.1	protein_coding	28	c.689-9304G>A
12	1844302	C	T	PASS	T	intron_variant	MODIFIER	C12H6orf10	102152239	transcript	XM_022425904.1	protein_coding	28	c.686-9304G>A
12	1844302	C	T	PASS	T	intron_variant	MODIFIER	C12H6orf10	102152239	transcript	XM_022425905.1	protein_coding	28	c.683-9304G>A
12	1844302	C	T	PASS	T	intron_variant	MODIFIER	C12H6orf10	102152239	transcript	XM_022425912.1	protein_coding	26	c.644-9304G>A
12	1844302	C	T	PASS	T	intron_variant	MODIFIER	C12H6orf10	102152239	transcript	XM_022425880.1	protein_coding	30	c.731-9304G>A
12	1844302	C	T	PASS	T	intron_variant	MODIFIER	C12H6orf10	102152239	transcript	XM_022425885.1	protein_coding	29	c.716-9304G>A
12	1844302	C	T	PASS	T	intron_variant	MODIFIER	C12H6orf10	102152239	transcript	XM_022425887.1	protein_coding	29	c.713-9304G>A
12	1844302	C	T	PASS	T	intron_variant	MODIFIER	C12H6orf10	102152239	transcript	XM_022425889.1	protein_coding	29	c.710-9304G>A
12	1844302	C	T	PASS	T	intron_variant	MODIFIER	C12H6orf10	102152239	transcript	XM_022425891.1	protein_coding	29	c.710-9304G>A
12	1844302	C	T	PASS	T	intron_variant	MODIFIER	C12H6orf10	102152239	transcript	XM_022425899.1	protein_coding	28	c.695-9304G>A
12	1844302	C	T	PASS	T	intron_variant	MODIFIER	C12H6orf10	102152239	transcript	XM_022425902.1	protein_coding	28	c.689-9304G>A
12	1844302	C	T	PASS	T	intron_variant	MODIFIER	C12H6orf10	102152239	transcript	XM_022425907.1	protein_coding	27	c.668-9304G>A
12	1844302	C	T	PASS	T	intron_variant	MODIFIER	C12H6orf10	102152239	transcript	XM_022425909.1	protein_coding	27	c.662-9304G>A
12	1844302	C	T	PASS	T	intron_variant	MODIFIER	C12H6orf10	102152239	transcript	XM_022425911.1	protein_coding	28	c.691+13665G>A
12	1844302	C	T	PASS	T	intron_variant	MODIFIER	C12H6orf10	102152239	transcript	XM_022425879.1	protein_coding	30	c.731-9304G>A
12	1844302	C	T	PASS	T	intron_variant	MODIFIER	C12H6orf10	102152239	transcript	XM_022425901.1	protein_coding	28	c.689-9304G>A
12	1844302	C	T	PASS	T	intron_variant	MODIFIER	C12H6orf10	102152239	transcript	XM_022425906.1	protein_coding	27	c.674-9304G>A
12	1844302	C	T	PASS	T	intron_variant	MODIFIER	C12H6orf10	102152239	transcript	XM_022425910.1	protein_coding	26	c.653-9304G>A
12	1844302	C	T	PASS	T	intron_variant	MODIFIER	C12H6orf10	102152239	transcript	XM_022425875.1	protein_coding	31	c.752-9304G>A
12	1844302	C	T	PASS	T	intron_variant	MODIFIER	C12H6orf10	102152239	transcript	XM_022425876.1	protein_coding	30	c.734-9304G>A
12	1844302	C	T	PASS	T	intron_variant	MODIFIER	C12H6orf10	102152239	transcript	XM_022425878.1	protein_coding	30	c.731-9304G>A
12	1844302	C	T	PASS	T	intron_variant	MODIFIER	C12H6orf10	102152239	transcript	XM_022425886.1	protein_coding	29	c.713-9304G>A
12	1844302	C	T	PASS	T	intron_variant	MODIFIER	C12H6orf10	102152239	transcript	XM_022425898.1	protein_coding	28	c.695-9304G>A
12	1844302	C	T	PASS	T	intron_variant	MODIFIER	C12H6orf10	102152239	transcript	XM_022425874.1	protein_coding	30	c.737-9304G>A
12	1844302	C	T	PASS	T	intron_variant	MODIFIER	C12H6orf10	102152239	transcript	XM_022425908.1	protein_coding	29	c.712+13665G>A
12	1844302	C	T	PASS	T	intron_variant	MODIFIER	C12H6orf10	102152239	transcript	XM_022425884.1	protein_coding	29	c.716-9304G>A
12	1889850	A	AT	PASS	AT	intron_variant	MODIFIER	C12H6orf10	102152239	transcript	XM_022425872.1	protein_coding	11	c.314-1555_314-1554insA
12	1889850	A	AT	PASS	AT	intron_variant	MODIFIER	C12H6orf10	102152239	transcript	XM_022425913.1	protein_coding	11	c.314-1555_314-1554insA
12	1889850	A	AT	PASS	AT	intron_variant	MODIFIER	C12H6orf10	102152239	transcript	XM_022425915.1	protein_coding	11	c.314-1555_314-1554insA
12	1889850	A	AT	PASS	AT	intron_variant	MODIFIER	C12H6orf10	102152239	transcript	XM_022425918.1	protein_coding	11	c.314-1555_314-1554insA
12	1889850	A	AT	PASS	AT	intron_variant	MODIFIER	C12H6orf10	102152239	transcript	XM_022425881.1	protein_coding	11	c.314-1555_314-1554insA
12	1889850	A	AT	PASS	AT	intron_variant	MODIFIER	C12H6orf10	102152239	transcript	XM_022425882.1	protein_coding	11	c.314-1555_314-1554insA
12	1889850	A	AT	PASS	AT	intron_variant	MODIFIER	C12H6orf10	102152239	transcript	XM_022425873.1	protein_coding	11	c.314-1555_314-1554insA
12	1889850	A	AT	PASS	AT	intron_variant	MODIFIER	C12H6orf10	102152239	transcript	XM_022425877.1	protein_coding	11	c.314-1555_314-1554insA
12	1889850	A	AT	PASS	AT	intron_variant	MODIFIER	C12H6orf10	102152239	transcript	XM_022425893.1	protein_coding	11	c.314-1555_314-1554insA
12	1889850	A	AT	PASS	AT	intron_variant	MODIFIER	C12H6orf10	102152239	transcript	XM_022425883.1	protein_coding	11	c.314-1555_314-1554insA
12	1889850	A	AT	PASS	AT	intron_variant	MODIFIER	C12H6orf10	102152239	transcript	XM_022425888.1	protein_coding	11	c.314-1555_314-1554insA
12	1889850	A	AT	PASS	AT	intron_variant	MODIFIER	C12H6orf10	102152239	transcript	XM_022425892.1	protein_coding	11	c.314-1555_314-1554insA
12	1889850	A	AT	PASS	AT	intron_variant	MODIFIER	C12H6orf10	102152239	transcript	XM_022425894.1	protein_coding	11	c.314-1555_314-1554insA
12	1889850	A	AT	PASS	AT	intron_variant	MODIFIER	C12H6orf10	102152239	transcript	XM_022425895.1	protein_coding	11	c.314-1555_314-1554insA
12	1889850	A	AT	PASS	AT	intron_variant	MODIFIER	C12H6orf10	102152239	transcript	XM_022425896.1	protein_coding	11	c.314-1555_314-1554insA
12	1889850	A	AT	PASS	AT	intron_variant	MODIFIER	C12H6orf10	102152239	transcript	XM_022425897.1	protein_coding	11	c.314-1555_314-1554insA
12	1889850	A	AT	PASS	AT	intron_variant	MODIFIER	C12H6orf10	102152239	transcript	XM_022425900.1	protein_coding	11	c.314-1555_314-1554insA
12	1889850	A	AT	PASS	AT	intron_variant	MODIFIER	C12H6orf10	102152239	transcript	XM_022425903.1	protein_coding	11	c.314-1555_314-1554insA
12	1889850	A	AT	PASS	AT	intron_variant	MODIFIER	C12H6orf10	102152239	transcript	XM_022425904.1	protein_coding	11	c.314-1555_314-1554insA
12	1889850	A	AT	PASS	AT	intron_variant	MODIFIER	C12H6orf10	102152239	transcript	XM_022425905.1	protein_coding	11	c.314-1555_314-1554insA
12	1889850	A	AT	PASS	AT	intron_variant	MODIFIER	C12H6orf10	102152239	transcript	XM_022425912.1	protein_coding	11	c.314-1555_314-1554insA
12	1889850	A	AT	PASS	AT	intron_variant	MODIFIER	C12H6orf10	102152239	transcript	XM_022425880.1	protein_coding	11	c.314-1555_314-1554insA
12	1889850	A	AT	PASS	AT	intron_variant	MODIFIER	C12H6orf10	102152239	transcript	XM_022425885.1	protein_coding	11	c.314-1555_314-1554insA
12	1889850	A	AT	PASS	AT	intron_variant	MODIFIER	C12H6orf10	102152239	transcript	XM_022425887.1	protein_coding	11	c.314-1555_314-1554insA
12	1889850	A	AT	PASS	AT	intron_variant	MODIFIER	C12H6orf10	102152239	transcript	XM_022425889.1	protein_coding	11	c.314-1555_314-1554insA
12	1889850	A	AT	PASS	AT	intron_variant	MODIFIER	C12H6orf10	102152239	transcript	XM_022425891.1	protein_coding	11	c.314-1555_314-1554insA
12	1889850	A	AT	PASS	AT	intron_variant	MODIFIER	C12H6orf10	102152239	transcript	XM_022425899.1	protein_coding	11	c.314-1555_314-1554insA
12	1889850	A	AT	PASS	AT	intron_variant	MODIFIER	C12H6orf10	102152239	transcript	XM_022425902.1	protein_coding	11	c.314-1555_314-1554insA
12	1889850	A	AT	PASS	AT	intron_variant	MODIFIER	C12H6orf10	102152239	transcript	XM_022425907.1	protein_coding	11	c.314-1555_314-1554insA
12	1889850	A	AT	PASS	AT	intron_variant	MODIFIER	C12H6orf10	102152239	transcript	XM_022425909.1	protein_coding	11	c.314-1555_314-1554insA
12	1889850	A	AT	PASS	AT	intron_variant	MODIFIER	C12H6orf10	102152239	transcript	XM_022425911.1	protein_coding	11	c.314-1555_314-1554insA
12	1889850	A	AT	PASS	AT	intron_variant	MODIFIER	C12H6orf10	102152239	transcript	XM_022425879.1	protein_coding	11	c.314-1555_314-1554insA
12	1889850	A	AT	PASS	AT	intron_variant	MODIFIER	C12H6orf10	102152239	transcript	XM_022425901.1	protein_coding	11	c.314-1555_314-1554insA
12	1889850	A	AT	PASS	AT	intron_variant	MODIFIER	C12H6orf10	102152239	transcript	XM_022425906.1	protein_coding	11	c.314-1555_314-1554insA
12	1889850	A	AT	PASS	AT	intron_variant	MODIFIER	C12H6orf10	102152239	transcript	XM_022425910.1	protein_coding	11	c.314-1555_314-1554insA
12	1889850	A	AT	PASS	AT	intron_variant	MODIFIER	C12H6orf10	102152239	transcript	XM_022425875.1	protein_coding	11	c.314-1555_314-1554insA
12	1889850	A	AT	PASS	AT	intron_variant	MODIFIER	C12H6orf10	102152239	transcript	XM_022425876.1	protein_coding	11	c.314-1555_314-1554insA
12	1889850	A	AT	PASS	AT	intron_variant	MODIFIER	C12H6orf10	102152239	transcript	XM_022425878.1	protein_coding	11	c.314-1555_314-1554insA
12	1889850	A	AT	PASS	AT	intron_variant	MODIFIER	C12H6orf10	102152239	transcript	XM_022425886.1	protein_coding	11	c.314-1555_314-1554insA
12	1889850	A	AT	PASS	AT	intron_variant	MODIFIER	C12H6orf10	102152239	transcript	XM_022425898.1	protein_coding	11	c.314-1555_314-1554insA
12	1889850	A	AT	PASS	AT	intron_variant	MODIFIER	C12H6orf10	102152239	transcript	XM_022425874.1	protein_coding	11	c.314-1555_314-1554insA
12	1889850	A	AT	PASS	AT	intron_variant	MODIFIER	C12H6orf10	102152239	transcript	XM_022425908.1	protein_coding	11	c.314-1555_314-1554insA
12	1889850	A	AT	PASS	AT	intron_variant	MODIFIER	C12H6orf10	102152239	transcript	XM_022425884.1	protein_coding	11	c.314-1555_314-1554insA
12	2025290	C	T	PASS	T	intron_variant	MODIFIER	LOC100686815	100686815	transcript	100686815	pseudogene	1	n.77+1511C>T
12	2030189	G	T	PASS	T	intron_variant	MODIFIER	LOC100686815	100686815	transcript	100686815	pseudogene	1	n.78-2213G>T
12	2093069	C	T	PASS	T	synonymous_variant	LOW	BTNL2	481730	transcript	XM_005627190.3	protein_coding	6	c.1011G>A	p.Gly337Gly
12	2093069	C	T	PASS	T	synonymous_variant	LOW	BTNL2	481730	transcript	XM_538851.6	protein_coding	6	c.1011G>A	p.Gly337Gly
12	2116419	A	C	PASS	C	intergenic_region	MODIFIER	BTNL2-DLA-DRA	481730-481731	intergenic_region	481730-481731		-1	n.2116419A>C
12	2158058	G	GAGAGAGAT	PASS	GAGAGAGAT	upstream_gene_variant	MODIFIER	LOC106559558	106559558	transcript	106559558	pseudogene	-1	n.-379_-378insAGAGAGAT
12	2158058	G	GAGAGAGAT	PASS	GAGAGAGAT	intron_variant	MODIFIER	HLA-DRB1	474860	transcript	NM_001014768.1	protein_coding	1	c.101-700_101-699insATCTCTCT
12	2158058	G	GAGAGAGAT	PASS	GAGAGAGAT	non_coding_transcript_exon_variant	MODIFIER	LOC111098218	111098218	transcript	XR_002631767.1	pseudogene	1	n.383_384insGATAGAGA
12	2199824	TGCAAATGA	T	PASS	T	intergenic_region	MODIFIER	LOC111098218-DLA-DQA1	111098218-474861	intergenic_region	111098218-474861		-1	n.2199825_2199832delGCAAATGA
12	2199833	C	CTTT	PASS	CTTT	intergenic_region	MODIFIER	LOC111098218-DLA-DQA1	111098218-474861	intergenic_region	111098218-474861		-1	n.2199833_2199834insTTT
12	2199834	A	ATCTT	PASS	ATCTT	intergenic_region	MODIFIER	LOC111098218-DLA-DQA1	111098218-474861	intergenic_region	111098218-474861		-1	n.2199834_2199835insTCTT
12	2266457	A	T	PASS	T	intergenic_region	MODIFIER	LOC100856137-DLA-DQB1	100856137-474862	intergenic_region	100856137-474862		-1	n.2266457A>T
12	3102342	A	G	PASS	G	intergenic_region	MODIFIER	IP6K3-LEMD2	481747-607981	intergenic_region	481747-607981		-1	n.3102342A>G
12	3560210	A	G	PASS	G	3_prime_UTR_variant	MODIFIER	NUDT3	100846983	transcript	XM_022425705.1	protein_coding	5	c.*7360T>C
12	3574817	C	A	PASS	A	intron_variant	MODIFIER	NUDT3	100846983	transcript	NM_001252389.1	protein_coding	3	c.255+2212G>T
12	3574817	C	A	PASS	A	intron_variant	MODIFIER	NUDT3	100846983	transcript	XM_022425705.1	protein_coding	3	c.189+2212G>T
12	3575167	C	A	PASS	A	intron_variant	MODIFIER	NUDT3	100846983	transcript	NM_001252389.1	protein_coding	3	c.255+1862G>T
12	3575167	C	A	PASS	A	intron_variant	MODIFIER	NUDT3	100846983	transcript	XM_022425705.1	protein_coding	3	c.189+1862G>T
12	3638341	TACAC	T	PASS	T	intron_variant	MODIFIER	NUDT3	100846983	transcript	NM_001252389.1	protein_coding	1	c.100-13294_100-13291delGTGT
12	3638341	TACAC	T	PASS	T	intron_variant	MODIFIER	NUDT3	100846983	transcript	XM_022425705.1	protein_coding	1	c.34-13294_34-13291delGTGT
12	3805678	G	A	PASS	A	intron_variant	MODIFIER	PACSIN1	608087	transcript	XM_005627229.3	protein_coding	3	c.221-95G>A
12	3805678	G	A	PASS	A	intron_variant	MODIFIER	PACSIN1	608087	transcript	XM_014118377.2	protein_coding	3	c.221-95G>A
12	3805678	G	A	PASS	A	intron_variant	MODIFIER	PACSIN1	608087	transcript	XM_014118378.2	protein_coding	3	c.221-95G>A
12	3805678	G	A	PASS	A	intron_variant	MODIFIER	PACSIN1	608087	transcript	XM_005627233.3	protein_coding	3	c.221-95G>A
12	3805678	G	A	PASS	A	intron_variant	MODIFIER	PACSIN1	608087	transcript	XM_005627231.2	protein_coding	3	c.221-95G>A
12	3805678	G	A	PASS	A	intron_variant	MODIFIER	PACSIN1	608087	transcript	XM_844990.4	protein_coding	3	c.221-95G>A
12	3805678	G	A	PASS	A	intron_variant	MODIFIER	PACSIN1	608087	transcript	XM_022425948.1	protein_coding	3	c.221-95G>A
12	4382518	T	G	PASS	G	upstream_gene_variant	MODIFIER	SCUBE3	481753	transcript	XM_005627251.3	protein_coding	-1	c.-1155T>G
12	4382518	T	G	PASS	G	upstream_gene_variant	MODIFIER	SCUBE3	481753	transcript	XM_005627252.3	protein_coding	-1	c.-1155T>G
12	4382518	T	G	PASS	G	upstream_gene_variant	MODIFIER	SCUBE3	481753	transcript	XM_538874.6	protein_coding	-1	c.-1155T>G
12	4382518	T	G	PASS	G	upstream_gene_variant	MODIFIER	SCUBE3	481753	transcript	XM_022425961.1	protein_coding	-1	c.-1155T>G
12	4382518	T	G	PASS	G	intergenic_region	MODIFIER	TCP11-SCUBE3	474883-481753	intergenic_region	474883-481753		-1	n.4382518T>G
12	4417569	AAGAG	A	PASS	A	downstream_gene_variant	MODIFIER	SCUBE3	481753	transcript	XM_005627251.3	protein_coding	-1	c.*904_*907delAGAG
12	4417569	AAGAG	A	PASS	A	downstream_gene_variant	MODIFIER	SCUBE3	481753	transcript	XM_005627252.3	protein_coding	-1	c.*904_*907delAGAG
12	4417569	AAGAG	A	PASS	A	downstream_gene_variant	MODIFIER	SCUBE3	481753	transcript	XM_538874.6	protein_coding	-1	c.*904_*907delAGAG
12	4417569	AAGAG	A	PASS	A	intron_variant	MODIFIER	SCUBE3	481753	transcript	XM_022425961.1	protein_coding	22	c.2881-659_2881-656delAGAG
12	5338345	C	T	PASS	T	missense_variant	MODERATE	BRPF3	481762	transcript	XM_538883.6	protein_coding	10	c.3196C>T	p.Leu1066Phe
12	5338345	C	T	PASS	T	downstream_gene_variant	MODIFIER	BRPF3	481762	transcript	XM_022425977.1	protein_coding	-1	c.*4135C>T
12	5338345	C	T	PASS	T	intron_variant	MODIFIER	BRPF3	481762	transcript	XM_005627267.2	protein_coding	9	c.3187+3494C>T
12	5338345	C	T	PASS	T	non_coding_transcript_exon_variant	MODIFIER	BRPF3	481762	transcript	XR_002631809.1	pseudogene	10	n.3218C>T
12	5422027	T	G	PASS	G	downstream_gene_variant	MODIFIER	C12H6orf222	608356	transcript	XM_022425978.1	protein_coding	-1	c.*5713A>C
12	5422027	T	G	PASS	G	intron_variant	MODIFIER	PNPLA1	481763	transcript	NM_001290109.1	protein_coding	9	c.1672-85T>G
12	5690282	C	G	PASS	G	downstream_gene_variant	MODIFIER	SRSF3	403687	transcript	XM_532124.6	protein_coding	-1	c.*6105C>G
12	5690282	C	G	PASS	G	downstream_gene_variant	MODIFIER	LOC111098236	111098236	transcript	XR_002631812.1	pseudogene	-1	n.*460G>C
12	5690282	C	G	PASS	G	intergenic_region	MODIFIER	SRSF3-LOC111098236	403687-111098236	intergenic_region	403687-111098236		-1	n.5690282C>G
12	10833010	A	C	PASS	C	intron_variant	MODIFIER	MRPS10	474902	transcript	XM_532137.6	protein_coding	1	c.48+282T>G
12	10833010	A	C	PASS	C	intron_variant	MODIFIER	MRPS10	474902	transcript	XM_005627350.3	protein_coding	1	c.48+282T>G
12	10892334	T	G	PASS	G	intron_variant	MODIFIER	TRERF1	608906	transcript	XM_014118440.2	protein_coding	4	c.-258-13108A>C
12	10892334	T	G	PASS	G	intron_variant	MODIFIER	TRERF1	608906	transcript	XM_022426048.1	protein_coding	3	c.-258-13108A>C
12	10892334	T	G	PASS	G	intron_variant	MODIFIER	TRERF1	608906	transcript	XM_014118443.2	protein_coding	4	c.-258-13108A>C
12	10892334	T	G	PASS	G	intron_variant	MODIFIER	TRERF1	608906	transcript	XM_005627351.3	protein_coding	4	c.-258-13108A>C
12	10892334	T	G	PASS	G	intron_variant	MODIFIER	TRERF1	608906	transcript	XM_005627357.3	protein_coding	4	c.-258-13108A>C
12	10892334	T	G	PASS	G	intron_variant	MODIFIER	TRERF1	608906	transcript	XM_846991.5	protein_coding	4	c.-258-13108A>C
12	10892334	T	G	PASS	G	intron_variant	MODIFIER	TRERF1	608906	transcript	XM_014118446.2	protein_coding	3	c.-258-13108A>C
12	10892334	T	G	PASS	G	intron_variant	MODIFIER	TRERF1	608906	transcript	XM_014118447.2	protein_coding	4	c.-258-13108A>C
12	10892334	T	G	PASS	G	intron_variant	MODIFIER	TRERF1	608906	transcript	XM_014118448.2	protein_coding	4	c.-258-13108A>C
12	10892334	T	G	PASS	G	intron_variant	MODIFIER	TRERF1	608906	transcript	XM_014118449.2	protein_coding	4	c.-258-13108A>C
12	10892334	T	G	PASS	G	intron_variant	MODIFIER	TRERF1	608906	transcript	XM_014118450.2	protein_coding	4	c.-258-13108A>C
12	10892334	T	G	PASS	G	intron_variant	MODIFIER	TRERF1	608906	transcript	XM_022426051.1	protein_coding	4	c.-258-13108A>C
12	10892334	T	G	PASS	G	intron_variant	MODIFIER	TRERF1	608906	transcript	XM_022426052.1	protein_coding	4	c.-258-13108A>C
12	10892334	T	G	PASS	G	intron_variant	MODIFIER	TRERF1	608906	transcript	XM_014118442.2	protein_coding	4	c.-258-13108A>C
12	10892334	T	G	PASS	G	intron_variant	MODIFIER	TRERF1	608906	transcript	XM_022426049.1	protein_coding	3	c.-258-13108A>C
12	10892334	T	G	PASS	G	intron_variant	MODIFIER	TRERF1	608906	transcript	XM_022426047.1	protein_coding	4	c.-258-13108A>C
12	10892334	T	G	PASS	G	intron_variant	MODIFIER	TRERF1	608906	transcript	XM_014118441.2	protein_coding	4	c.-258-13108A>C
12	10892334	T	G	PASS	G	intron_variant	MODIFIER	TRERF1	608906	transcript	XM_022426046.1	protein_coding	4	c.-258-13108A>C
12	11036636	C	T	PASS	T	intron_variant	MODIFIER	TRERF1	608906	transcript	XM_014118440.2	protein_coding	2	c.-457+8815G>A
12	11036636	C	T	PASS	T	intron_variant	MODIFIER	TRERF1	608906	transcript	XM_014118443.2	protein_coding	2	c.-457+8815G>A
12	11036636	C	T	PASS	T	intron_variant	MODIFIER	TRERF1	608906	transcript	XM_005627351.3	protein_coding	2	c.-457+8815G>A
12	11036636	C	T	PASS	T	intron_variant	MODIFIER	TRERF1	608906	transcript	XM_005627357.3	protein_coding	2	c.-457+8815G>A
12	11036636	C	T	PASS	T	intron_variant	MODIFIER	TRERF1	608906	transcript	XM_846991.5	protein_coding	2	c.-457+8815G>A
12	11036636	C	T	PASS	T	intron_variant	MODIFIER	TRERF1	608906	transcript	XM_014118446.2	protein_coding	2	c.-374+8815G>A
12	11036636	C	T	PASS	T	intron_variant	MODIFIER	TRERF1	608906	transcript	XM_014118447.2	protein_coding	2	c.-457+8815G>A
12	11036636	C	T	PASS	T	intron_variant	MODIFIER	TRERF1	608906	transcript	XM_014118448.2	protein_coding	2	c.-457+8815G>A
12	11036636	C	T	PASS	T	intron_variant	MODIFIER	TRERF1	608906	transcript	XM_014118449.2	protein_coding	2	c.-457+8815G>A
12	11036636	C	T	PASS	T	intron_variant	MODIFIER	TRERF1	608906	transcript	XM_014118450.2	protein_coding	2	c.-457+8815G>A
12	11036636	C	T	PASS	T	intron_variant	MODIFIER	TRERF1	608906	transcript	XM_022426051.1	protein_coding	2	c.-457+8815G>A
12	11036636	C	T	PASS	T	intron_variant	MODIFIER	TRERF1	608906	transcript	XM_022426052.1	protein_coding	2	c.-457+8815G>A
12	11036636	C	T	PASS	T	intron_variant	MODIFIER	TRERF1	608906	transcript	XM_014118442.2	protein_coding	2	c.-457+8815G>A
12	11036636	C	T	PASS	T	intron_variant	MODIFIER	TRERF1	608906	transcript	XM_022426049.1	protein_coding	2	c.-374+8815G>A
12	11036636	C	T	PASS	T	intron_variant	MODIFIER	TRERF1	608906	transcript	XM_022426047.1	protein_coding	2	c.-457+8815G>A
12	11036636	C	T	PASS	T	intron_variant	MODIFIER	TRERF1	608906	transcript	XM_014118441.2	protein_coding	2	c.-457+8815G>A
12	11036636	C	T	PASS	T	intron_variant	MODIFIER	TRERF1	608906	transcript	XM_022426046.1	protein_coding	2	c.-457+8815G>A
12	15080913	G	A	PASS	A	intron_variant	MODIFIER	ADGRF5	474926	transcript	XM_005627441.3	protein_coding	1	c.-25+4955C>T
12	15080913	G	A	PASS	A	intron_variant	MODIFIER	ADGRF5	474926	transcript	XM_532160.6	protein_coding	1	c.-25+4955C>T
12	15080913	G	A	PASS	A	intron_variant	MODIFIER	ADGRF5	474926	transcript	XM_005627445.3	protein_coding	1	c.-25+4955C>T
12	15080913	G	A	PASS	A	intron_variant	MODIFIER	ADGRF5	474926	transcript	XM_005627443.3	protein_coding	1	c.-25+4955C>T
12	15080913	G	A	PASS	A	intron_variant	MODIFIER	ADGRF5	474926	transcript	XM_005627444.3	protein_coding	1	c.-25+4955C>T
12	15080913	G	A	PASS	A	intron_variant	MODIFIER	ADGRF5	474926	transcript	XM_022426127.1	protein_coding	2	c.-24-10490C>T
12	15080913	G	A	PASS	A	intron_variant	MODIFIER	ADGRF5	474926	transcript	XM_005627442.3	protein_coding	1	c.-24-10490C>T
12	16104256	C	T	PASS	T	downstream_gene_variant	MODIFIER	LOC111098276	111098276	transcript	XR_002631923.1	pseudogene	-1	n.*2647C>T
12	16104256	C	T	PASS	T	intergenic_region	MODIFIER	LOC111098276-474929	111098276-474929	intergenic_region	111098276-474929		-1	n.16104256C>T
12	17667717	A	G	PASS	G	intron_variant	MODIFIER	CRISP1	100855553	transcript	XM_003639431.2	protein_coding	7	c.697+2307T>C
12	18419716	T	TA	PASS	TA	intergenic_region	MODIFIER	LOC100687202-LOC111098158	100687202-111098158	intergenic_region	100687202-111098158		-1	n.18419716_18419717insA
12	18726458	CCTTAT	C	PASS	C	intergenic_region	MODIFIER	LOC111098159-LOC111098280	111098159-111098280	intergenic_region	111098159-111098280		-1	n.18726459_18726463delCTTAT
12	18834324	T	A	PASS	A	intergenic_region	MODIFIER	LOC111098159-LOC111098280	111098159-111098280	intergenic_region	111098159-111098280		-1	n.18834324T>A
12	18891013	T	C	PASS	C	intergenic_region	MODIFIER	LOC111098159-LOC111098280	111098159-111098280	intergenic_region	111098159-111098280		-1	n.18891013T>C
12	33040748	C	A	PASS	A	intron_variant	MODIFIER	FAM135A	474960	transcript	XM_014118105.2	protein_coding	17	c.3860-952C>A
12	33040748	C	A	PASS	A	intron_variant	MODIFIER	FAM135A	474960	transcript	XM_005627529.3	protein_coding	17	c.3272-952C>A
12	33040748	C	A	PASS	A	intron_variant	MODIFIER	FAM135A	474960	transcript	XM_848166.5	protein_coding	16	c.3782-952C>A
12	33040748	C	A	PASS	A	intron_variant	MODIFIER	FAM135A	474960	transcript	XM_862044.5	protein_coding	16	c.3194-952C>A
12	33040748	C	A	PASS	A	intron_variant	MODIFIER	FAM135A	474960	transcript	XM_022426188.1	protein_coding	17	c.3860-952C>A
12	33040748	C	A	PASS	A	intron_variant	MODIFIER	FAM135A	474960	transcript	XM_022426189.1	protein_coding	16	c.3725-952C>A
12	33040748	C	A	PASS	A	intron_variant	MODIFIER	FAM135A	474960	transcript	XM_014118108.2	protein_coding	16	c.3860-952C>A
12	33040748	C	A	PASS	A	intron_variant	MODIFIER	FAM135A	474960	transcript	XM_022426190.1	protein_coding	8	c.3026-952C>A
12	33040748	C	A	PASS	A	intron_variant	MODIFIER	FAM135A	474960	transcript	XM_022426191.1	protein_coding	6	c.2870-952C>A
12	33040794	C	T	PASS	T	intron_variant	MODIFIER	FAM135A	474960	transcript	XM_014118105.2	protein_coding	17	c.3860-906C>T
12	33040794	C	T	PASS	T	intron_variant	MODIFIER	FAM135A	474960	transcript	XM_005627529.3	protein_coding	17	c.3272-906C>T
12	33040794	C	T	PASS	T	intron_variant	MODIFIER	FAM135A	474960	transcript	XM_848166.5	protein_coding	16	c.3782-906C>T
12	33040794	C	T	PASS	T	intron_variant	MODIFIER	FAM135A	474960	transcript	XM_862044.5	protein_coding	16	c.3194-906C>T
12	33040794	C	T	PASS	T	intron_variant	MODIFIER	FAM135A	474960	transcript	XM_022426188.1	protein_coding	17	c.3860-906C>T
12	33040794	C	T	PASS	T	intron_variant	MODIFIER	FAM135A	474960	transcript	XM_022426189.1	protein_coding	16	c.3725-906C>T
12	33040794	C	T	PASS	T	intron_variant	MODIFIER	FAM135A	474960	transcript	XM_014118108.2	protein_coding	16	c.3860-906C>T
12	33040794	C	T	PASS	T	intron_variant	MODIFIER	FAM135A	474960	transcript	XM_022426190.1	protein_coding	8	c.3026-906C>T
12	33040794	C	T	PASS	T	intron_variant	MODIFIER	FAM135A	474960	transcript	XM_022426191.1	protein_coding	6	c.2870-906C>T
12	38287638	C	T	PASS	T	intergenic_region	MODIFIER	LOC100685005-LOC100685246	100685005-100685246	intergenic_region	100685005-100685246		-1	n.38287638C>T
12	39359984	A	G	PASS	G	intergenic_region	MODIFIER	LOC611288-LOC111098326	611288-111098326	intergenic_region	611288-111098326		-1	n.39359984A>G
12	45598788	C	CG	PASS	CG	5_prime_UTR_variant	MODIFIER	SNX14	474985	transcript	XM_022426319.1	protein_coding	1	c.-82dupC
12	45598788	C	CG	PASS	CG	5_prime_UTR_variant	MODIFIER	SNX14	474985	transcript	XM_022426320.1	protein_coding	1	c.-82dupC
12	45598788	C	CG	PASS	CG	upstream_gene_variant	MODIFIER	SNX14	474985	transcript	XM_532222.6	protein_coding	-1	c.-326dupC
12	45598788	C	CG	PASS	CG	upstream_gene_variant	MODIFIER	LOC111098346	111098346	transcript	XR_002632061.1	pseudogene	-1	n.-173_-172insG
12	45598788	C	CG	PASS	CG	upstream_gene_variant	MODIFIER	SNX14	474985	transcript	XM_005627589.3	protein_coding	-1	c.-326dupC
12	45598788	C	CG	PASS	CG	upstream_gene_variant	MODIFIER	SNX14	474985	transcript	XM_005627590.3	protein_coding	-1	c.-326dupC
12	45598788	C	CG	PASS	CG	upstream_gene_variant	MODIFIER	SNX14	474985	transcript	XM_005627593.3	protein_coding	-1	c.-326dupC
12	45598788	C	CG	PASS	CG	upstream_gene_variant	MODIFIER	SNX14	474985	transcript	XM_022426318.1	protein_coding	-1	c.-326dupC
12	46297423	C	T	PASS	T	intergenic_region	MODIFIER	LOC102152711-LOC100688390	102152711-100688390	intergenic_region	102152711-100688390		-1	n.46297423C>T
12	46842305	A	G	PASS	G	intron_variant	MODIFIER	SMIM8	474988	transcript	XM_005627603.3	protein_coding	2	c.-26-979A>G
12	46842305	A	G	PASS	G	intron_variant	MODIFIER	SMIM8	474988	transcript	XM_005627605.3	protein_coding	1	c.-26-979A>G
12	46842305	A	G	PASS	G	intron_variant	MODIFIER	SMIM8	474988	transcript	XM_022426330.1	protein_coding	3	c.-26-979A>G
12	46842305	A	G	PASS	G	intron_variant	MODIFIER	SMIM8	474988	transcript	XM_022426331.1	protein_coding	1	c.-26-979A>G
12	46842305	A	G	PASS	G	intron_variant	MODIFIER	SMIM8	474988	transcript	XM_532225.7	protein_coding	2	c.-26-979A>G
12	50748647	A	T	PASS	T	intergenic_region	MODIFIER	LOC111098362-LOC111098175	111098362-111098175	intergenic_region	111098362-111098175		-1	n.50748647A>T
12	51107289	A	ACATGATCCAGCAACCTAGAGACCCGGGAAAGATCATGTGAGC	PASS	ACATGATCCAGCAACCTAGAGACCCGGGAAAGATCATGTGAGC	intergenic_region	MODIFIER	LOC111098363-LOC111098176	111098363-111098176	intergenic_region	111098363-111098176		-1	n.51107289_51107290insCATGATCCAGCAACCTAGAGACCCGGGAAAGATCATGTGAGC
12	51154676	AAGAAAGAAAGAAAGAAGAAGAAAGAAAGAAAGAAAGAAAGAAAGAAAGAAAGAAAGAAAAAAAAAGAAAGAAAGAAAGAAAAGAAAGAAAGAAAGAAAGAAAGAAAGAAAGAAAGAAAGAAAGAAAAGAAAGAAAGAAAGAAAAAGAAAG	A	PASS	A	intergenic_region	MODIFIER	LOC111098363-LOC111098176	111098363-111098176	intergenic_region	111098363-111098176		-1	n.51154677_51154826del
12	51731529	G	A	PASS	A	intergenic_region	MODIFIER	LOC111098176-EPHA7	111098176-474997	intergenic_region	111098176-474997		-1	n.51731529G>A
12	51882951	CGGTA	C	PASS	C	intergenic_region	MODIFIER	LOC111098176-EPHA7	111098176-474997	intergenic_region	111098176-474997		-1	n.51882952_51882955delGGTA
12	52258694	T	C	PASS	C	intron_variant	MODIFIER	EPHA7	474997	transcript	XM_848830.5	protein_coding	3	c.833-13423A>G
12	52258694	T	C	PASS	C	intron_variant	MODIFIER	EPHA7	474997	transcript	XM_005627643.2	protein_coding	3	c.833-13423A>G
12	52258694	T	C	PASS	C	intron_variant	MODIFIER	EPHA7	474997	transcript	XM_005627645.2	protein_coding	3	c.833-13423A>G
12	52258694	T	C	PASS	C	intron_variant	MODIFIER	EPHA7	474997	transcript	XM_005627646.3	protein_coding	3	c.833-13423A>G
12	52258729	C	T	PASS	T	intron_variant	MODIFIER	EPHA7	474997	transcript	XM_848830.5	protein_coding	3	c.833-13458G>A
12	52258729	C	T	PASS	T	intron_variant	MODIFIER	EPHA7	474997	transcript	XM_005627643.2	protein_coding	3	c.833-13458G>A
12	52258729	C	T	PASS	T	intron_variant	MODIFIER	EPHA7	474997	transcript	XM_005627645.2	protein_coding	3	c.833-13458G>A
12	52258729	C	T	PASS	T	intron_variant	MODIFIER	EPHA7	474997	transcript	XM_005627646.3	protein_coding	3	c.833-13458G>A
12	52339746	ATATAT	A	PASS	A	intergenic_region	MODIFIER	EPHA7-LOC100687798	474997-100687798	intergenic_region	474997-100687798		-1	n.52339747_52339751delTATAT
12	52739932	G	A	PASS	A	intergenic_region	MODIFIER	LOC100687798-LOC100684677	100687798-100684677	intergenic_region	100687798-100684677		-1	n.52739932G>A
12	57651128	G	A	PASS	A	intron_variant	MODIFIER	USP45	481933	transcript	XM_022426387.1	protein_coding	12	c.1303-446C>T
12	57651128	G	A	PASS	A	intron_variant	MODIFIER	USP45	481933	transcript	XM_022426391.1	protein_coding	4	c.223-446C>T
12	57651128	G	A	PASS	A	intron_variant	MODIFIER	USP45	481933	transcript	XM_022426390.1	protein_coding	4	c.223-446C>T
12	57651128	G	A	PASS	A	intron_variant	MODIFIER	USP45	481933	transcript	XM_022426388.1	protein_coding	12	c.1300-446C>T
12	57651128	G	A	PASS	A	intron_variant	MODIFIER	USP45	481933	transcript	XR_002632110.1	pseudogene	12	n.1359-446C>T
12	57651128	G	A	PASS	A	intron_variant	MODIFIER	USP45	481933	transcript	XM_022426389.1	protein_coding	12	c.1303-446C>T
12	68653993	G	C	PASS	C	intergenic_region	MODIFIER	LAMA4-RFPL4B	475034-111098190	intergenic_region	475034-111098190		-1	n.68653993G>C
13	1252539	T	A	PASS	A	intron_variant	MODIFIER	VPS13B	481981	transcript	XM_014118535.2	protein_coding	17	c.2515+19402T>A
13	1252539	T	A	PASS	A	intron_variant	MODIFIER	VPS13B	481981	transcript	XM_005627823.3	protein_coding	17	c.2516-13099T>A
13	1252539	T	A	PASS	A	intron_variant	MODIFIER	VPS13B	481981	transcript	XM_022426562.1	protein_coding	17	c.2515+19402T>A
13	1252539	T	A	PASS	A	intron_variant	MODIFIER	VPS13B	481981	transcript	XR_002632293.1	pseudogene	17	n.2681+19402T>A
13	1252539	T	A	PASS	A	intron_variant	MODIFIER	VPS13B	481981	transcript	XM_022426560.1	protein_coding	17	c.2515+19402T>A
13	1252539	T	A	PASS	A	intron_variant	MODIFIER	VPS13B	481981	transcript	XM_850840.6	protein_coding	17	c.2515+19402T>A
13	1252539	T	A	PASS	A	intron_variant	MODIFIER	VPS13B	481981	transcript	XM_005627819.3	protein_coding	17	c.2515+19402T>A
13	1252539	T	A	PASS	A	intron_variant	MODIFIER	VPS13B	481981	transcript	XM_005627820.3	protein_coding	17	c.2515+19402T>A
13	1252539	T	A	PASS	A	intron_variant	MODIFIER	VPS13B	481981	transcript	XM_022426558.1	protein_coding	16	c.2371+19402T>A
13	1252539	T	A	PASS	A	intron_variant	MODIFIER	VPS13B	481981	transcript	XM_539102.7	protein_coding	17	c.2515+19402T>A
13	1252539	T	A	PASS	A	intron_variant	MODIFIER	VPS13B	481981	transcript	XM_022426559.1	protein_coding	15	c.2251+19402T>A
13	11021820	T	TTTTTTTTTTAA	PASS	TTTTTTTTTTAA	intergenic_region	MODIFIER	LOC482012-LOC111098526	482012-111098526	intergenic_region	482012-111098526		-1	n.11021820_11021821insTTTTTTTTTAA
13	11021878	TGGCAGAGACATA	T	PASS	T	intergenic_region	MODIFIER	LOC482012-LOC111098526	482012-111098526	intergenic_region	482012-111098526		-1	n.11021879_11021890delGGCAGAGACATA
13	34533785	G	A	PASS	A	intergenic_region	MODIFIER	KCNK9-LOC106559658	482057-106559658	intergenic_region	482057-106559658		-1	n.34533785G>A
13	34547595	G	A	PASS	A	upstream_gene_variant	MODIFIER	LOC106559658	106559658	transcript	XM_014118871.2	protein_coding	-1	c.-4883G>A
13	34547595	G	A	PASS	A	intergenic_region	MODIFIER	KCNK9-LOC106559658	482057-106559658	intergenic_region	482057-106559658		-1	n.34547595G>A
13	34554907	C	T	PASS	T	downstream_gene_variant	MODIFIER	LOC106559658	106559658	transcript	XM_014118871.2	protein_coding	-1	c.*1408C>T
13	34554907	C	T	PASS	T	intergenic_region	MODIFIER	LOC106559658-TRAPPC9	106559658-482058	intergenic_region	106559658-482058		-1	n.34554907C>T
13	34576391	G	A	PASS	A	downstream_gene_variant	MODIFIER	TRAPPC9	482058	transcript	XM_005627991.2	protein_coding	-1	c.*3284C>T
13	34576391	G	A	PASS	A	downstream_gene_variant	MODIFIER	TRAPPC9	482058	transcript	XM_539179.5	protein_coding	-1	c.*3284C>T
13	34576391	G	A	PASS	A	intergenic_region	MODIFIER	LOC106559658-TRAPPC9	106559658-482058	intergenic_region	106559658-482058		-1	n.34576391G>A
13	34583180	G	A	PASS	A	intron_variant	MODIFIER	TRAPPC9	482058	transcript	XM_005627991.2	protein_coding	19	c.3029-2511C>T
13	34583180	G	A	PASS	A	intron_variant	MODIFIER	TRAPPC9	482058	transcript	XM_539179.5	protein_coding	20	c.3056-2511C>T
13	34641321	C	T	PASS	T	intron_variant	MODIFIER	TRAPPC9	482058	transcript	XM_022426747.1	protein_coding	20	c.3056-9783G>A
13	34641321	C	T	PASS	T	intron_variant	MODIFIER	TRAPPC9	482058	transcript	XM_005627991.2	protein_coding	19	c.3028+45527G>A
13	34641321	C	T	PASS	T	intron_variant	MODIFIER	TRAPPC9	482058	transcript	XM_539179.5	protein_coding	20	c.3055+45527G>A
13	34641321	C	T	PASS	T	intron_variant	MODIFIER	TRAPPC9	482058	transcript	XM_022426753.1	protein_coding	20	c.3056-43177G>A
13	34641321	C	T	PASS	T	intron_variant	MODIFIER	TRAPPC9	482058	transcript	XM_022426748.1	protein_coding	19	c.3029-9783G>A
13	34641321	C	T	PASS	T	intron_variant	MODIFIER	TRAPPC9	482058	transcript	XM_022426749.1	protein_coding	19	c.2912-9783G>A
13	34707756	C	T	PASS	T	intron_variant	MODIFIER	TRAPPC9	482058	transcript	XM_022426747.1	protein_coding	18	c.2811-4336G>A
13	34707756	C	T	PASS	T	intron_variant	MODIFIER	TRAPPC9	482058	transcript	XM_005627991.2	protein_coding	17	c.2784-4336G>A
13	34707756	C	T	PASS	T	intron_variant	MODIFIER	TRAPPC9	482058	transcript	XM_539179.5	protein_coding	18	c.2811-4336G>A
13	34707756	C	T	PASS	T	intron_variant	MODIFIER	TRAPPC9	482058	transcript	XM_022426753.1	protein_coding	18	c.2811-4336G>A
13	34707756	C	T	PASS	T	intron_variant	MODIFIER	TRAPPC9	482058	transcript	XM_022426748.1	protein_coding	17	c.2784-4336G>A
13	34707756	C	T	PASS	T	intron_variant	MODIFIER	TRAPPC9	482058	transcript	XM_022426749.1	protein_coding	17	c.2667-4336G>A
13	34707756	C	T	PASS	T	intron_variant	MODIFIER	TRAPPC9	482058	transcript	XM_022426752.1	protein_coding	18	c.2811-4336G>A
13	34707756	C	T	PASS	T	intron_variant	MODIFIER	TRAPPC9	482058	transcript	XM_022426751.1	protein_coding	18	c.2811-4336G>A
13	34707756	C	T	PASS	T	intron_variant	MODIFIER	TRAPPC9	482058	transcript	XM_022426750.1	protein_coding	18	c.2811-4336G>A
13	34770899	TTGA	T	PASS	T	intron_variant	MODIFIER	TRAPPC9	482058	transcript	XM_022426747.1	protein_coding	17	c.2699+7879_2699+7881delTCA
13	34770899	TTGA	T	PASS	T	intron_variant	MODIFIER	TRAPPC9	482058	transcript	XM_005627991.2	protein_coding	16	c.2672+7879_2672+7881delTCA
13	34770899	TTGA	T	PASS	T	intron_variant	MODIFIER	TRAPPC9	482058	transcript	XM_539179.5	protein_coding	17	c.2699+7879_2699+7881delTCA
13	34770899	TTGA	T	PASS	T	intron_variant	MODIFIER	TRAPPC9	482058	transcript	XM_022426753.1	protein_coding	17	c.2699+7879_2699+7881delTCA
13	34770899	TTGA	T	PASS	T	intron_variant	MODIFIER	TRAPPC9	482058	transcript	XM_022426748.1	protein_coding	16	c.2672+7879_2672+7881delTCA
13	34770899	TTGA	T	PASS	T	intron_variant	MODIFIER	TRAPPC9	482058	transcript	XM_022426749.1	protein_coding	16	c.2555+7879_2555+7881delTCA
13	34770899	TTGA	T	PASS	T	intron_variant	MODIFIER	TRAPPC9	482058	transcript	XM_022426752.1	protein_coding	17	c.2699+7879_2699+7881delTCA
13	34770899	TTGA	T	PASS	T	intron_variant	MODIFIER	TRAPPC9	482058	transcript	XM_022426751.1	protein_coding	17	c.2699+7879_2699+7881delTCA
13	34770899	TTGA	T	PASS	T	intron_variant	MODIFIER	TRAPPC9	482058	transcript	XM_022426750.1	protein_coding	17	c.2699+7879_2699+7881delTCA
13	34775821	C	T	PASS	T	intron_variant	MODIFIER	TRAPPC9	482058	transcript	XM_022426747.1	protein_coding	17	c.2699+2960G>A
13	34775821	C	T	PASS	T	intron_variant	MODIFIER	TRAPPC9	482058	transcript	XM_005627991.2	protein_coding	16	c.2672+2960G>A
13	34775821	C	T	PASS	T	intron_variant	MODIFIER	TRAPPC9	482058	transcript	XM_539179.5	protein_coding	17	c.2699+2960G>A
13	34775821	C	T	PASS	T	intron_variant	MODIFIER	TRAPPC9	482058	transcript	XM_022426753.1	protein_coding	17	c.2699+2960G>A
13	34775821	C	T	PASS	T	intron_variant	MODIFIER	TRAPPC9	482058	transcript	XM_022426748.1	protein_coding	16	c.2672+2960G>A
13	34775821	C	T	PASS	T	intron_variant	MODIFIER	TRAPPC9	482058	transcript	XM_022426749.1	protein_coding	16	c.2555+2960G>A
13	34775821	C	T	PASS	T	intron_variant	MODIFIER	TRAPPC9	482058	transcript	XM_022426752.1	protein_coding	17	c.2699+2960G>A
13	34775821	C	T	PASS	T	intron_variant	MODIFIER	TRAPPC9	482058	transcript	XM_022426751.1	protein_coding	17	c.2699+2960G>A
13	34775821	C	T	PASS	T	intron_variant	MODIFIER	TRAPPC9	482058	transcript	XM_022426750.1	protein_coding	17	c.2699+2960G>A
13	34779080	A	T	PASS	T	intron_variant	MODIFIER	TRAPPC9	482058	transcript	XM_022426747.1	protein_coding	16	c.2557-157T>A
13	34779080	A	T	PASS	T	intron_variant	MODIFIER	TRAPPC9	482058	transcript	XM_005627991.2	protein_coding	15	c.2530-157T>A
13	34779080	A	T	PASS	T	intron_variant	MODIFIER	TRAPPC9	482058	transcript	XM_539179.5	protein_coding	16	c.2557-157T>A
13	34779080	A	T	PASS	T	intron_variant	MODIFIER	TRAPPC9	482058	transcript	XM_022426753.1	protein_coding	16	c.2557-157T>A
13	34779080	A	T	PASS	T	intron_variant	MODIFIER	TRAPPC9	482058	transcript	XM_022426748.1	protein_coding	15	c.2530-157T>A
13	34779080	A	T	PASS	T	intron_variant	MODIFIER	TRAPPC9	482058	transcript	XM_022426749.1	protein_coding	15	c.2413-157T>A
13	34779080	A	T	PASS	T	intron_variant	MODIFIER	TRAPPC9	482058	transcript	XM_022426752.1	protein_coding	16	c.2557-157T>A
13	34779080	A	T	PASS	T	intron_variant	MODIFIER	TRAPPC9	482058	transcript	XM_022426751.1	protein_coding	16	c.2557-157T>A
13	34779080	A	T	PASS	T	intron_variant	MODIFIER	TRAPPC9	482058	transcript	XM_022426750.1	protein_coding	16	c.2557-157T>A
13	34779672	C	T	PASS	T	intron_variant	MODIFIER	TRAPPC9	482058	transcript	XM_022426747.1	protein_coding	16	c.2557-749G>A
13	34779672	C	T	PASS	T	intron_variant	MODIFIER	TRAPPC9	482058	transcript	XM_005627991.2	protein_coding	15	c.2530-749G>A
13	34779672	C	T	PASS	T	intron_variant	MODIFIER	TRAPPC9	482058	transcript	XM_539179.5	protein_coding	16	c.2557-749G>A
13	34779672	C	T	PASS	T	intron_variant	MODIFIER	TRAPPC9	482058	transcript	XM_022426753.1	protein_coding	16	c.2557-749G>A
13	34779672	C	T	PASS	T	intron_variant	MODIFIER	TRAPPC9	482058	transcript	XM_022426748.1	protein_coding	15	c.2530-749G>A
13	34779672	C	T	PASS	T	intron_variant	MODIFIER	TRAPPC9	482058	transcript	XM_022426749.1	protein_coding	15	c.2413-749G>A
13	34779672	C	T	PASS	T	intron_variant	MODIFIER	TRAPPC9	482058	transcript	XM_022426752.1	protein_coding	16	c.2557-749G>A
13	34779672	C	T	PASS	T	intron_variant	MODIFIER	TRAPPC9	482058	transcript	XM_022426751.1	protein_coding	16	c.2557-749G>A
13	34779672	C	T	PASS	T	intron_variant	MODIFIER	TRAPPC9	482058	transcript	XM_022426750.1	protein_coding	16	c.2557-749G>A
13	34801124	G	A	PASS	A	intron_variant	MODIFIER	TRAPPC9	482058	transcript	XM_022426747.1	protein_coding	16	c.2557-22201C>T
13	34801124	G	A	PASS	A	intron_variant	MODIFIER	TRAPPC9	482058	transcript	XM_005627991.2	protein_coding	15	c.2530-22201C>T
13	34801124	G	A	PASS	A	intron_variant	MODIFIER	TRAPPC9	482058	transcript	XM_539179.5	protein_coding	16	c.2557-22201C>T
13	34801124	G	A	PASS	A	intron_variant	MODIFIER	TRAPPC9	482058	transcript	XM_022426753.1	protein_coding	16	c.2557-22201C>T
13	34801124	G	A	PASS	A	intron_variant	MODIFIER	TRAPPC9	482058	transcript	XM_022426748.1	protein_coding	15	c.2530-22201C>T
13	34801124	G	A	PASS	A	intron_variant	MODIFIER	TRAPPC9	482058	transcript	XM_022426749.1	protein_coding	15	c.2413-22201C>T
13	34801124	G	A	PASS	A	intron_variant	MODIFIER	TRAPPC9	482058	transcript	XM_022426752.1	protein_coding	16	c.2557-22201C>T
13	34801124	G	A	PASS	A	intron_variant	MODIFIER	TRAPPC9	482058	transcript	XM_022426751.1	protein_coding	16	c.2557-22201C>T
13	34801124	G	A	PASS	A	intron_variant	MODIFIER	TRAPPC9	482058	transcript	XM_022426750.1	protein_coding	16	c.2557-22201C>T
13	34805758	T	C	PASS	C	intron_variant	MODIFIER	TRAPPC9	482058	transcript	XM_022426747.1	protein_coding	16	c.2557-26835A>G
13	34805758	T	C	PASS	C	intron_variant	MODIFIER	TRAPPC9	482058	transcript	XM_005627991.2	protein_coding	15	c.2530-26835A>G
13	34805758	T	C	PASS	C	intron_variant	MODIFIER	TRAPPC9	482058	transcript	XM_539179.5	protein_coding	16	c.2557-26835A>G
13	34805758	T	C	PASS	C	intron_variant	MODIFIER	TRAPPC9	482058	transcript	XM_022426753.1	protein_coding	16	c.2557-26835A>G
13	34805758	T	C	PASS	C	intron_variant	MODIFIER	TRAPPC9	482058	transcript	XM_022426748.1	protein_coding	15	c.2530-26835A>G
13	34805758	T	C	PASS	C	intron_variant	MODIFIER	TRAPPC9	482058	transcript	XM_022426749.1	protein_coding	15	c.2413-26835A>G
13	34805758	T	C	PASS	C	intron_variant	MODIFIER	TRAPPC9	482058	transcript	XM_022426752.1	protein_coding	16	c.2557-26835A>G
13	34805758	T	C	PASS	C	intron_variant	MODIFIER	TRAPPC9	482058	transcript	XM_022426751.1	protein_coding	16	c.2557-26835A>G
13	34805758	T	C	PASS	C	intron_variant	MODIFIER	TRAPPC9	482058	transcript	XM_022426750.1	protein_coding	16	c.2557-26835A>G
13	34820789	C	T	PASS	T	intron_variant	MODIFIER	TRAPPC9	482058	transcript	XM_022426747.1	protein_coding	16	c.2557-41866G>A
13	34820789	C	T	PASS	T	intron_variant	MODIFIER	TRAPPC9	482058	transcript	XM_005627991.2	protein_coding	15	c.2530-41866G>A
13	34820789	C	T	PASS	T	intron_variant	MODIFIER	TRAPPC9	482058	transcript	XM_539179.5	protein_coding	16	c.2557-41866G>A
13	34820789	C	T	PASS	T	intron_variant	MODIFIER	TRAPPC9	482058	transcript	XM_022426753.1	protein_coding	16	c.2557-41866G>A
13	34820789	C	T	PASS	T	intron_variant	MODIFIER	TRAPPC9	482058	transcript	XM_022426748.1	protein_coding	15	c.2530-41866G>A
13	34820789	C	T	PASS	T	intron_variant	MODIFIER	TRAPPC9	482058	transcript	XM_022426749.1	protein_coding	15	c.2413-41866G>A
13	34820789	C	T	PASS	T	intron_variant	MODIFIER	TRAPPC9	482058	transcript	XM_022426752.1	protein_coding	16	c.2557-41866G>A
13	34820789	C	T	PASS	T	intron_variant	MODIFIER	TRAPPC9	482058	transcript	XM_022426751.1	protein_coding	16	c.2557-41866G>A
13	34820789	C	T	PASS	T	intron_variant	MODIFIER	TRAPPC9	482058	transcript	XM_022426750.1	protein_coding	16	c.2557-41866G>A
13	34828125	A	G	PASS	G	intron_variant	MODIFIER	TRAPPC9	482058	transcript	XM_022426747.1	protein_coding	16	c.2557-49202T>C
13	34828125	A	G	PASS	G	intron_variant	MODIFIER	TRAPPC9	482058	transcript	XM_005627991.2	protein_coding	15	c.2530-49202T>C
13	34828125	A	G	PASS	G	intron_variant	MODIFIER	TRAPPC9	482058	transcript	XM_539179.5	protein_coding	16	c.2557-49202T>C
13	34828125	A	G	PASS	G	intron_variant	MODIFIER	TRAPPC9	482058	transcript	XM_022426753.1	protein_coding	16	c.2557-49202T>C
13	34828125	A	G	PASS	G	intron_variant	MODIFIER	TRAPPC9	482058	transcript	XM_022426748.1	protein_coding	15	c.2530-49202T>C
13	34828125	A	G	PASS	G	intron_variant	MODIFIER	TRAPPC9	482058	transcript	XM_022426749.1	protein_coding	15	c.2413-49202T>C
13	34828125	A	G	PASS	G	intron_variant	MODIFIER	TRAPPC9	482058	transcript	XM_022426752.1	protein_coding	16	c.2557-49202T>C
13	34828125	A	G	PASS	G	intron_variant	MODIFIER	TRAPPC9	482058	transcript	XM_022426751.1	protein_coding	16	c.2557-49202T>C
13	34828125	A	G	PASS	G	intron_variant	MODIFIER	TRAPPC9	482058	transcript	XM_022426750.1	protein_coding	16	c.2557-49202T>C
13	34884359	G	A	PASS	A	intron_variant	MODIFIER	TRAPPC9	482058	transcript	XM_022426747.1	protein_coding	16	c.2556+65192C>T
13	34884359	G	A	PASS	A	intron_variant	MODIFIER	TRAPPC9	482058	transcript	XM_005627991.2	protein_coding	15	c.2529+65192C>T
13	34884359	G	A	PASS	A	intron_variant	MODIFIER	TRAPPC9	482058	transcript	XM_539179.5	protein_coding	16	c.2556+65192C>T
13	34884359	G	A	PASS	A	intron_variant	MODIFIER	TRAPPC9	482058	transcript	XM_022426753.1	protein_coding	16	c.2556+65192C>T
13	34884359	G	A	PASS	A	intron_variant	MODIFIER	TRAPPC9	482058	transcript	XM_022426748.1	protein_coding	15	c.2529+65192C>T
13	34884359	G	A	PASS	A	intron_variant	MODIFIER	TRAPPC9	482058	transcript	XM_022426749.1	protein_coding	15	c.2412+65192C>T
13	34884359	G	A	PASS	A	intron_variant	MODIFIER	TRAPPC9	482058	transcript	XM_022426752.1	protein_coding	16	c.2556+65192C>T
13	34884359	G	A	PASS	A	intron_variant	MODIFIER	TRAPPC9	482058	transcript	XM_022426751.1	protein_coding	16	c.2556+65192C>T
13	34884359	G	A	PASS	A	intron_variant	MODIFIER	TRAPPC9	482058	transcript	XM_022426750.1	protein_coding	16	c.2556+65192C>T
13	34886343	C	T	PASS	T	intron_variant	MODIFIER	TRAPPC9	482058	transcript	XM_022426747.1	protein_coding	16	c.2556+63208G>A
13	34886343	C	T	PASS	T	intron_variant	MODIFIER	TRAPPC9	482058	transcript	XM_005627991.2	protein_coding	15	c.2529+63208G>A
13	34886343	C	T	PASS	T	intron_variant	MODIFIER	TRAPPC9	482058	transcript	XM_539179.5	protein_coding	16	c.2556+63208G>A
13	34886343	C	T	PASS	T	intron_variant	MODIFIER	TRAPPC9	482058	transcript	XM_022426753.1	protein_coding	16	c.2556+63208G>A
13	34886343	C	T	PASS	T	intron_variant	MODIFIER	TRAPPC9	482058	transcript	XM_022426748.1	protein_coding	15	c.2529+63208G>A
13	34886343	C	T	PASS	T	intron_variant	MODIFIER	TRAPPC9	482058	transcript	XM_022426749.1	protein_coding	15	c.2412+63208G>A
13	34886343	C	T	PASS	T	intron_variant	MODIFIER	TRAPPC9	482058	transcript	XM_022426752.1	protein_coding	16	c.2556+63208G>A
13	34886343	C	T	PASS	T	intron_variant	MODIFIER	TRAPPC9	482058	transcript	XM_022426751.1	protein_coding	16	c.2556+63208G>A
13	34886343	C	T	PASS	T	intron_variant	MODIFIER	TRAPPC9	482058	transcript	XM_022426750.1	protein_coding	16	c.2556+63208G>A
13	34908901	G	A	PASS	A	upstream_gene_variant	MODIFIER	LOC111098572	111098572	transcript	XR_002632537.1	pseudogene	-1	n.-3320C>T
13	34908901	G	A	PASS	A	intron_variant	MODIFIER	TRAPPC9	482058	transcript	XM_022426747.1	protein_coding	16	c.2556+40650C>T
13	34908901	G	A	PASS	A	intron_variant	MODIFIER	TRAPPC9	482058	transcript	XM_005627991.2	protein_coding	15	c.2529+40650C>T
13	34908901	G	A	PASS	A	intron_variant	MODIFIER	TRAPPC9	482058	transcript	XM_539179.5	protein_coding	16	c.2556+40650C>T
13	34908901	G	A	PASS	A	intron_variant	MODIFIER	TRAPPC9	482058	transcript	XM_022426753.1	protein_coding	16	c.2556+40650C>T
13	34908901	G	A	PASS	A	intron_variant	MODIFIER	TRAPPC9	482058	transcript	XM_022426748.1	protein_coding	15	c.2529+40650C>T
13	34908901	G	A	PASS	A	intron_variant	MODIFIER	TRAPPC9	482058	transcript	XM_022426749.1	protein_coding	15	c.2412+40650C>T
13	34908901	G	A	PASS	A	intron_variant	MODIFIER	TRAPPC9	482058	transcript	XM_022426752.1	protein_coding	16	c.2556+40650C>T
13	34908901	G	A	PASS	A	intron_variant	MODIFIER	TRAPPC9	482058	transcript	XM_022426751.1	protein_coding	16	c.2556+40650C>T
13	34908901	G	A	PASS	A	intron_variant	MODIFIER	TRAPPC9	482058	transcript	XM_022426750.1	protein_coding	16	c.2556+40650C>T
13	34935477	G	A	PASS	A	intron_variant	MODIFIER	TRAPPC9	482058	transcript	XM_022426747.1	protein_coding	16	c.2556+14074C>T
13	34935477	G	A	PASS	A	intron_variant	MODIFIER	TRAPPC9	482058	transcript	XM_005627991.2	protein_coding	15	c.2529+14074C>T
13	34935477	G	A	PASS	A	intron_variant	MODIFIER	TRAPPC9	482058	transcript	XM_539179.5	protein_coding	16	c.2556+14074C>T
13	34935477	G	A	PASS	A	intron_variant	MODIFIER	TRAPPC9	482058	transcript	XM_022426753.1	protein_coding	16	c.2556+14074C>T
13	34935477	G	A	PASS	A	intron_variant	MODIFIER	TRAPPC9	482058	transcript	XM_022426748.1	protein_coding	15	c.2529+14074C>T
13	34935477	G	A	PASS	A	intron_variant	MODIFIER	TRAPPC9	482058	transcript	XM_022426749.1	protein_coding	15	c.2412+14074C>T
13	34935477	G	A	PASS	A	intron_variant	MODIFIER	TRAPPC9	482058	transcript	XM_022426752.1	protein_coding	16	c.2556+14074C>T
13	34935477	G	A	PASS	A	intron_variant	MODIFIER	TRAPPC9	482058	transcript	XM_022426751.1	protein_coding	16	c.2556+14074C>T
13	34935477	G	A	PASS	A	intron_variant	MODIFIER	TRAPPC9	482058	transcript	XM_022426750.1	protein_coding	16	c.2556+14074C>T
13	35000267	G	A	PASS	A	intron_variant	MODIFIER	TRAPPC9	482058	transcript	XM_022426747.1	protein_coding	12	c.1981+821C>T
13	35000267	G	A	PASS	A	intron_variant	MODIFIER	TRAPPC9	482058	transcript	XM_005627991.2	protein_coding	11	c.1954+821C>T
13	35000267	G	A	PASS	A	intron_variant	MODIFIER	TRAPPC9	482058	transcript	XM_539179.5	protein_coding	12	c.1981+821C>T
13	35000267	G	A	PASS	A	intron_variant	MODIFIER	TRAPPC9	482058	transcript	XM_022426753.1	protein_coding	12	c.1981+821C>T
13	35000267	G	A	PASS	A	intron_variant	MODIFIER	TRAPPC9	482058	transcript	XM_022426748.1	protein_coding	11	c.1954+821C>T
13	35000267	G	A	PASS	A	intron_variant	MODIFIER	TRAPPC9	482058	transcript	XM_022426749.1	protein_coding	11	c.1837+821C>T
13	35000267	G	A	PASS	A	intron_variant	MODIFIER	TRAPPC9	482058	transcript	XM_022426752.1	protein_coding	12	c.1981+821C>T
13	35000267	G	A	PASS	A	intron_variant	MODIFIER	TRAPPC9	482058	transcript	XM_022426751.1	protein_coding	12	c.1981+821C>T
13	35000267	G	A	PASS	A	intron_variant	MODIFIER	TRAPPC9	482058	transcript	XM_022426750.1	protein_coding	12	c.1981+821C>T
13	35008914	G	A	PASS	A	intron_variant	MODIFIER	TRAPPC9	482058	transcript	XM_022426747.1	protein_coding	10	c.1768+3617C>T
13	35008914	G	A	PASS	A	intron_variant	MODIFIER	TRAPPC9	482058	transcript	XM_005627991.2	protein_coding	9	c.1741+3617C>T
13	35008914	G	A	PASS	A	intron_variant	MODIFIER	TRAPPC9	482058	transcript	XM_539179.5	protein_coding	10	c.1768+3617C>T
13	35008914	G	A	PASS	A	intron_variant	MODIFIER	TRAPPC9	482058	transcript	XM_022426753.1	protein_coding	10	c.1768+3617C>T
13	35008914	G	A	PASS	A	intron_variant	MODIFIER	TRAPPC9	482058	transcript	XM_022426748.1	protein_coding	9	c.1741+3617C>T
13	35008914	G	A	PASS	A	intron_variant	MODIFIER	TRAPPC9	482058	transcript	XM_022426749.1	protein_coding	9	c.1624+3617C>T
13	35008914	G	A	PASS	A	intron_variant	MODIFIER	TRAPPC9	482058	transcript	XM_022426752.1	protein_coding	10	c.1768+3617C>T
13	35008914	G	A	PASS	A	intron_variant	MODIFIER	TRAPPC9	482058	transcript	XM_022426751.1	protein_coding	10	c.1768+3617C>T
13	35008914	G	A	PASS	A	intron_variant	MODIFIER	TRAPPC9	482058	transcript	XM_022426750.1	protein_coding	10	c.1768+3617C>T
13	35013778	T	C	PASS	C	intron_variant	MODIFIER	TRAPPC9	482058	transcript	XM_022426747.1	protein_coding	9	c.1623-1102A>G
13	35013778	T	C	PASS	C	intron_variant	MODIFIER	TRAPPC9	482058	transcript	XM_005627991.2	protein_coding	8	c.1596-1102A>G
13	35013778	T	C	PASS	C	intron_variant	MODIFIER	TRAPPC9	482058	transcript	XM_539179.5	protein_coding	9	c.1623-1102A>G
13	35013778	T	C	PASS	C	intron_variant	MODIFIER	TRAPPC9	482058	transcript	XM_022426753.1	protein_coding	9	c.1623-1102A>G
13	35013778	T	C	PASS	C	intron_variant	MODIFIER	TRAPPC9	482058	transcript	XM_022426748.1	protein_coding	8	c.1596-1102A>G
13	35013778	T	C	PASS	C	intron_variant	MODIFIER	TRAPPC9	482058	transcript	XM_022426749.1	protein_coding	8	c.1479-1102A>G
13	35013778	T	C	PASS	C	intron_variant	MODIFIER	TRAPPC9	482058	transcript	XM_022426752.1	protein_coding	9	c.1623-1102A>G
13	35013778	T	C	PASS	C	intron_variant	MODIFIER	TRAPPC9	482058	transcript	XM_022426751.1	protein_coding	9	c.1623-1102A>G
13	35013778	T	C	PASS	C	intron_variant	MODIFIER	TRAPPC9	482058	transcript	XM_022426750.1	protein_coding	9	c.1623-1102A>G
13	35038275	A	G	PASS	G	downstream_gene_variant	MODIFIER	LOC111098642	111098642	transcript	111098642	pseudogene	-1	n.*4223A>G
13	35038275	A	G	PASS	G	intron_variant	MODIFIER	TRAPPC9	482058	transcript	XM_022426747.1	protein_coding	8	c.1495+13354T>C
13	35038275	A	G	PASS	G	intron_variant	MODIFIER	TRAPPC9	482058	transcript	XM_005627991.2	protein_coding	7	c.1468+13354T>C
13	35038275	A	G	PASS	G	intron_variant	MODIFIER	TRAPPC9	482058	transcript	XM_539179.5	protein_coding	8	c.1495+13354T>C
13	35038275	A	G	PASS	G	intron_variant	MODIFIER	TRAPPC9	482058	transcript	XM_022426753.1	protein_coding	8	c.1495+13354T>C
13	35038275	A	G	PASS	G	intron_variant	MODIFIER	TRAPPC9	482058	transcript	XM_022426748.1	protein_coding	7	c.1468+13354T>C
13	35038275	A	G	PASS	G	intron_variant	MODIFIER	TRAPPC9	482058	transcript	XM_022426749.1	protein_coding	7	c.1352-16556T>C
13	35038275	A	G	PASS	G	intron_variant	MODIFIER	TRAPPC9	482058	transcript	XM_022426752.1	protein_coding	8	c.1495+13354T>C
13	35038275	A	G	PASS	G	intron_variant	MODIFIER	TRAPPC9	482058	transcript	XM_022426751.1	protein_coding	8	c.1495+13354T>C
13	35038275	A	G	PASS	G	intron_variant	MODIFIER	TRAPPC9	482058	transcript	XM_022426750.1	protein_coding	8	c.1495+13354T>C
13	35053214	T	TA	PASS	TA	intron_variant	MODIFIER	TRAPPC9	482058	transcript	XM_022426747.1	protein_coding	7	c.1352-1443_1352-1442insT
13	35053214	T	TA	PASS	TA	intron_variant	MODIFIER	TRAPPC9	482058	transcript	XM_005627991.2	protein_coding	6	c.1325-1443_1325-1442insT
13	35053214	T	TA	PASS	TA	intron_variant	MODIFIER	TRAPPC9	482058	transcript	XM_539179.5	protein_coding	7	c.1352-1443_1352-1442insT
13	35053214	T	TA	PASS	TA	intron_variant	MODIFIER	TRAPPC9	482058	transcript	XM_022426753.1	protein_coding	7	c.1352-1443_1352-1442insT
13	35053214	T	TA	PASS	TA	intron_variant	MODIFIER	TRAPPC9	482058	transcript	XM_022426748.1	protein_coding	6	c.1325-1443_1325-1442insT
13	35053214	T	TA	PASS	TA	intron_variant	MODIFIER	TRAPPC9	482058	transcript	XM_022426749.1	protein_coding	7	c.1351+3242_1351+3243insT
13	35053214	T	TA	PASS	TA	intron_variant	MODIFIER	TRAPPC9	482058	transcript	XM_022426752.1	protein_coding	7	c.1352-1443_1352-1442insT
13	35053214	T	TA	PASS	TA	intron_variant	MODIFIER	TRAPPC9	482058	transcript	XM_022426751.1	protein_coding	7	c.1352-1443_1352-1442insT
13	35053214	T	TA	PASS	TA	intron_variant	MODIFIER	TRAPPC9	482058	transcript	XM_022426750.1	protein_coding	7	c.1352-1443_1352-1442insT
13	35062806	TTATGAG	T	PASS	T	intron_variant	MODIFIER	TRAPPC9	482058	transcript	XM_022426747.1	protein_coding	6	c.1135-6139_1135-6134delCTCATA
13	35062806	TTATGAG	T	PASS	T	intron_variant	MODIFIER	TRAPPC9	482058	transcript	XM_005627991.2	protein_coding	5	c.1108-6139_1108-6134delCTCATA
13	35062806	TTATGAG	T	PASS	T	intron_variant	MODIFIER	TRAPPC9	482058	transcript	XM_539179.5	protein_coding	6	c.1135-6139_1135-6134delCTCATA
13	35062806	TTATGAG	T	PASS	T	intron_variant	MODIFIER	TRAPPC9	482058	transcript	XM_022426753.1	protein_coding	6	c.1135-6139_1135-6134delCTCATA
13	35062806	TTATGAG	T	PASS	T	intron_variant	MODIFIER	TRAPPC9	482058	transcript	XM_022426748.1	protein_coding	5	c.1108-6139_1108-6134delCTCATA
13	35062806	TTATGAG	T	PASS	T	intron_variant	MODIFIER	TRAPPC9	482058	transcript	XM_022426749.1	protein_coding	6	c.1135-6139_1135-6134delCTCATA
13	35062806	TTATGAG	T	PASS	T	intron_variant	MODIFIER	TRAPPC9	482058	transcript	XM_022426752.1	protein_coding	6	c.1135-6139_1135-6134delCTCATA
13	35062806	TTATGAG	T	PASS	T	intron_variant	MODIFIER	TRAPPC9	482058	transcript	XM_022426751.1	protein_coding	6	c.1135-6139_1135-6134delCTCATA
13	35062806	TTATGAG	T	PASS	T	intron_variant	MODIFIER	TRAPPC9	482058	transcript	XM_022426750.1	protein_coding	6	c.1135-6139_1135-6134delCTCATA
13	35083344	C	T	PASS	T	intron_variant	MODIFIER	TRAPPC9	482058	transcript	XM_022426747.1	protein_coding	4	c.887-1605G>A
13	35083344	C	T	PASS	T	intron_variant	MODIFIER	TRAPPC9	482058	transcript	XM_005627991.2	protein_coding	3	c.860-1605G>A
13	35083344	C	T	PASS	T	intron_variant	MODIFIER	TRAPPC9	482058	transcript	XM_539179.5	protein_coding	4	c.887-1605G>A
13	35083344	C	T	PASS	T	intron_variant	MODIFIER	TRAPPC9	482058	transcript	XM_022426753.1	protein_coding	4	c.887-1605G>A
13	35083344	C	T	PASS	T	intron_variant	MODIFIER	TRAPPC9	482058	transcript	XM_022426748.1	protein_coding	3	c.860-1605G>A
13	35083344	C	T	PASS	T	intron_variant	MODIFIER	TRAPPC9	482058	transcript	XM_022426749.1	protein_coding	4	c.887-1605G>A
13	35083344	C	T	PASS	T	intron_variant	MODIFIER	TRAPPC9	482058	transcript	XM_022426752.1	protein_coding	4	c.887-1605G>A
13	35083344	C	T	PASS	T	intron_variant	MODIFIER	TRAPPC9	482058	transcript	XM_022426751.1	protein_coding	4	c.887-1605G>A
13	35083344	C	T	PASS	T	intron_variant	MODIFIER	TRAPPC9	482058	transcript	XM_022426750.1	protein_coding	4	c.887-1605G>A
13	35208618	C	T	PASS	T	intron_variant	MODIFIER	AGO2	475107	transcript	XM_022426754.1	protein_coding	2	c.199-3447G>A
13	35208618	C	T	PASS	T	intron_variant	MODIFIER	AGO2	475107	transcript	XM_022426755.1	protein_coding	2	c.106-3447G>A
13	35274239	G	A	PASS	A	intergenic_region	MODIFIER	AGO2-LOC111098575	475107-111098575	intergenic_region	475107-111098575		-1	n.35274239G>A
13	35616973	C	A	PASS	A	intergenic_region	MODIFIER	LOC106559645-DENND3	106559645-100688774	intergenic_region	106559645-100688774		-1	n.35616973C>A
13	35854861	G	A	PASS	A	intergenic_region	MODIFIER	GPR20-PTP4A3	482061-606961	intergenic_region	482061-606961		-1	n.35854861G>A
13	35900268	C	G	PASS	G	intron_variant	MODIFIER	MROH5	608000	transcript	XM_022426777.1	protein_coding	21	c.3054-2623G>C
13	35900268	C	G	PASS	G	intron_variant	MODIFIER	MROH5	608000	transcript	XM_005627998.2	protein_coding	21	c.3003-2623G>C
13	35900268	C	G	PASS	G	intron_variant	MODIFIER	MROH5	608000	transcript	XM_022426778.1	protein_coding	21	c.3054-2623G>C
13	35900268	C	G	PASS	G	intron_variant	MODIFIER	MROH5	608000	transcript	XM_022426779.1	protein_coding	21	c.3021-2623G>C
13	35900268	C	G	PASS	G	intron_variant	MODIFIER	MROH5	608000	transcript	XM_022426780.1	protein_coding	21	c.3054-2623G>C
13	35900268	C	G	PASS	G	intron_variant	MODIFIER	MROH5	608000	transcript	XM_022426782.1	protein_coding	21	c.3003-2623G>C
13	35900268	C	G	PASS	G	intron_variant	MODIFIER	MROH5	608000	transcript	XM_022426783.1	protein_coding	21	c.3054-2623G>C
13	35967751	C	A	PASS	A	intergenic_region	MODIFIER	LOC111098578-LOC111098456	111098578-111098456	intergenic_region	111098578-111098456		-1	n.35967751C>A
13	36011501	G	A	PASS	A	intergenic_region	MODIFIER	LOC111098578-LOC111098456	111098578-111098456	intergenic_region	111098578-111098456		-1	n.36011501G>A
13	36032002	C	T	PASS	T	intergenic_region	MODIFIER	LOC111098456-LOC111098457	111098456-111098457	intergenic_region	111098456-111098457		-1	n.36032002C>T
13	36129985	G	A	PASS	A	intergenic_region	MODIFIER	LOC111098456-LOC111098457	111098456-111098457	intergenic_region	111098456-111098457		-1	n.36129985G>A
13	36191645	CAA	C	PASS	C	intergenic_region	MODIFIER	LOC111098457-LOC102156803	111098457-102156803	intergenic_region	111098457-102156803		-1	n.36191646_36191647delAA
13	36437256	C	CCCGCCCCCCCCA	PASS	CCCGCCCCCCCCA	intergenic_region	MODIFIER	LOC111098458-TSNARE1	111098458-482064	intergenic_region	111098458-482064		-1	n.36437256_36437257insCCGCCCCCCCCA
13	36471467	CTG	C	PASS	C	intron_variant	MODIFIER	TSNARE1	482064	transcript	XM_022426787.1	protein_coding	13	c.1903-16754_1903-16753delCA
13	36471467	CTG	C	PASS	C	intron_variant	MODIFIER	TSNARE1	482064	transcript	XM_022426790.1	protein_coding	12	c.1426-16754_1426-16753delCA
13	36471467	CTG	C	PASS	C	intron_variant	MODIFIER	TSNARE1	482064	transcript	XM_022426791.1	protein_coding	12	c.1423-16754_1423-16753delCA
13	36591644	G	A	PASS	A	upstream_gene_variant	MODIFIER	TSNARE1	482064	transcript	XM_014118712.2	protein_coding	-1	c.-38486C>T
13	36591644	G	A	PASS	A	upstream_gene_variant	MODIFIER	TSNARE1	482064	transcript	XM_022426787.1	protein_coding	-1	c.-38486C>T
13	36591644	G	A	PASS	A	upstream_gene_variant	MODIFIER	TSNARE1	482064	transcript	XM_022426790.1	protein_coding	-1	c.-38486C>T
13	36591644	G	A	PASS	A	upstream_gene_variant	MODIFIER	TSNARE1	482064	transcript	XM_022426791.1	protein_coding	-1	c.-38486C>T
13	36591644	G	A	PASS	A	upstream_gene_variant	MODIFIER	TSNARE1	482064	transcript	XM_005628005.3	protein_coding	-1	c.-38486C>T
13	36591644	G	A	PASS	A	upstream_gene_variant	MODIFIER	TSNARE1	482064	transcript	XM_014118714.2	protein_coding	-1	c.-38486C>T
13	36591644	G	A	PASS	A	upstream_gene_variant	MODIFIER	TSNARE1	482064	transcript	XM_014118715.2	protein_coding	-1	c.-38486C>T
13	36591644	G	A	PASS	A	upstream_gene_variant	MODIFIER	TSNARE1	482064	transcript	XM_014118716.2	protein_coding	-1	c.-38486C>T
13	36591644	G	A	PASS	A	upstream_gene_variant	MODIFIER	TSNARE1	482064	transcript	XM_014118722.2	protein_coding	-1	c.-38486C>T
13	36591644	G	A	PASS	A	upstream_gene_variant	MODIFIER	TSNARE1	482064	transcript	XM_014118723.2	protein_coding	-1	c.-38486C>T
13	36591644	G	A	PASS	A	upstream_gene_variant	MODIFIER	TSNARE1	482064	transcript	XM_014118724.2	protein_coding	-1	c.-38486C>T
13	36591644	G	A	PASS	A	upstream_gene_variant	MODIFIER	TSNARE1	482064	transcript	XR_001317571.2	pseudogene	-1	n.-3272C>T
13	36591644	G	A	PASS	A	upstream_gene_variant	MODIFIER	TSNARE1	482064	transcript	XR_001317572.2	pseudogene	-1	n.-3272C>T
13	36591644	G	A	PASS	A	upstream_gene_variant	MODIFIER	TSNARE1	482064	transcript	XR_002632552.1	pseudogene	-1	n.-3272C>T
13	36591644	G	A	PASS	A	upstream_gene_variant	MODIFIER	TSNARE1	482064	transcript	XM_022426785.1	protein_coding	-1	c.-38486C>T
13	36591644	G	A	PASS	A	upstream_gene_variant	MODIFIER	TSNARE1	482064	transcript	XM_022426786.1	protein_coding	-1	c.-38486C>T
13	36591644	G	A	PASS	A	upstream_gene_variant	MODIFIER	TSNARE1	482064	transcript	XM_014118720.2	protein_coding	-1	c.-38486C>T
13	36591644	G	A	PASS	A	upstream_gene_variant	MODIFIER	TSNARE1	482064	transcript	XR_002632551.1	pseudogene	-1	n.-3272C>T
13	36591644	G	A	PASS	A	upstream_gene_variant	MODIFIER	TSNARE1	482064	transcript	XR_001317574.2	pseudogene	-1	n.-3272C>T
13	36591644	G	A	PASS	A	upstream_gene_variant	MODIFIER	TSNARE1	482064	transcript	XM_022426793.1	protein_coding	-1	c.-38486C>T
13	36591644	G	A	PASS	A	intergenic_region	MODIFIER	TSNARE1-ADGRB1	482064-100683150	intergenic_region	482064-100683150		-1	n.36591644G>A
13	36631010	G	A	PASS	A	intron_variant	MODIFIER	ADGRB1	100683150	transcript	XM_022426506.1	protein_coding	2	c.1213+1933G>A
13	36976860	G	A	PASS	A	intron_variant	MODIFIER	LOC106559659	106559659	transcript	XR_001317621.2	pseudogene	1	n.2809+175C>T
13	36976860	G	A	PASS	A	non_coding_transcript_exon_variant	MODIFIER	LOC106559659	106559659	transcript	XR_002632558.1	pseudogene	1	n.2984C>T
13	37280457	G	A	PASS	A	5_prime_UTR_variant	MODIFIER	ZNF623	102153483	transcript	XM_005628036.3	protein_coding	1	c.-178G>A
13	37280457	G	A	PASS	A	upstream_gene_variant	MODIFIER	ZNF623	102153483	transcript	XM_014118852.2	protein_coding	-1	c.-7489G>A
13	37470871	G	A	PASS	A	intron_variant	MODIFIER	PLEC	482083	transcript	XM_005628059.3	protein_coding	7	c.912+75C>T
13	37470871	G	A	PASS	A	intron_variant	MODIFIER	PLEC	482083	transcript	XM_005628058.2	protein_coding	7	c.486+75C>T
13	37470871	G	A	PASS	A	intron_variant	MODIFIER	PLEC	482083	transcript	XM_005628060.2	protein_coding	6	c.471+75C>T
13	37470871	G	A	PASS	A	intron_variant	MODIFIER	PLEC	482083	transcript	XM_852201.4	protein_coding	5	c.435+75C>T
13	37470871	G	A	PASS	A	intron_variant	MODIFIER	PLEC	482083	transcript	XM_005628055.3	protein_coding	7	c.510+75C>T
13	37470871	G	A	PASS	A	intron_variant	MODIFIER	PLEC	482083	transcript	XM_005628056.3	protein_coding	6	c.495+75C>T
13	37470871	G	A	PASS	A	intron_variant	MODIFIER	PLEC	482083	transcript	XM_005628062.3	protein_coding	5	c.459+75C>T
13	37470871	G	A	PASS	A	intron_variant	MODIFIER	PLEC	482083	transcript	XM_005628057.3	protein_coding	7	c.486+75C>T
13	37470871	G	A	PASS	A	intron_variant	MODIFIER	PLEC	482083	transcript	XM_005628061.3	protein_coding	6	c.471+75C>T
13	37470871	G	A	PASS	A	intron_variant	MODIFIER	PLEC	482083	transcript	XM_005628063.3	protein_coding	6	c.450+75C>T
13	37470871	G	A	PASS	A	intron_variant	MODIFIER	PLEC	482083	transcript	XM_852242.5	protein_coding	5	c.435+75C>T
13	37470871	G	A	PASS	A	intron_variant	MODIFIER	PLEC	482083	transcript	XM_005628065.3	protein_coding	7	c.417+75C>T
13	37470871	G	A	PASS	A	intron_variant	MODIFIER	PLEC	482083	transcript	XM_022426860.1	protein_coding	6	c.402+75C>T
13	37470871	G	A	PASS	A	intron_variant	MODIFIER	PLEC	482083	transcript	XM_005628052.3	protein_coding	6	c.876+75C>T
13	37470871	G	A	PASS	A	intron_variant	MODIFIER	PLEC	482083	transcript	XM_539204.6	protein_coding	5	c.861+75C>T
13	37470871	G	A	PASS	A	intron_variant	MODIFIER	PLEC	482083	transcript	XM_005628051.3	protein_coding	6	c.897+75C>T
13	37470871	G	A	PASS	A	intron_variant	MODIFIER	PLEC	482083	transcript	XM_005628064.2	protein_coding	7	c.420+75C>T
13	37470871	G	A	PASS	A	intron_variant	MODIFIER	PLEC	482083	transcript	XM_005628066.3	protein_coding	6	c.405+75C>T
13	37470871	G	A	PASS	A	intron_variant	MODIFIER	PLEC	482083	transcript	XM_005628054.3	protein_coding	8	c.564+75C>T
13	37470871	G	A	PASS	A	intron_variant	MODIFIER	PLEC	482083	transcript	XM_005628053.2	protein_coding	8	c.564+75C>T
13	37470871	G	A	PASS	A	intron_variant	MODIFIER	PLEC	482083	transcript	XM_022426858.1	protein_coding	7	c.549+75C>T
13	37470871	G	A	PASS	A	intron_variant	MODIFIER	PLEC	482083	transcript	XM_843706.4	protein_coding	6	c.513+75C>T
13	37689877	G	A	PASS	A	intron_variant	MODIFIER	MROH1	482090	transcript	XM_014118656.2	protein_coding	30	c.3292-476G>A
13	37696449	C	T	PASS	T	downstream_gene_variant	MODIFIER	BOP1	100685748	transcript	XM_022426513.1	protein_coding	-1	c.*2251G>A
13	37696449	C	T	PASS	T	intron_variant	MODIFIER	MROH1	482090	transcript	XM_014118656.2	protein_coding	35	c.4063-132C>T
13	37837734	C	T	PASS	T	missense_variant	MODERATE	SLC39A4	482096	transcript	XM_014118658.2	protein_coding	2	c.247G>A	p.Ala83Thr
13	37837734	C	T	PASS	T	downstream_gene_variant	MODIFIER	VPS28	607677	transcript	XM_844152.5	protein_coding	-1	c.*3918G>A
13	37837734	C	T	PASS	T	downstream_gene_variant	MODIFIER	VPS28	607677	transcript	XM_014118867.2	protein_coding	-1	c.*3918G>A
13	37837734	C	T	PASS	T	downstream_gene_variant	MODIFIER	VPS28	607677	transcript	XM_853130.5	protein_coding	-1	c.*3918G>A
13	37899658	G	C	PASS	C	intron_variant	MODIFIER	PPP1R16A	482099	transcript	XM_005628091.3	protein_coding	1	c.-936+12037G>C
13	37899658	G	C	PASS	C	intron_variant	MODIFIER	PPP1R16A	482099	transcript	XM_005628092.3	protein_coding	1	c.-1102-5543G>C
13	37899658	G	C	PASS	C	intron_variant	MODIFIER	PPP1R16A	482099	transcript	XM_539220.5	protein_coding	1	c.-936+12152G>C
13	37899658	G	C	PASS	C	intron_variant	MODIFIER	PPP1R16A	482099	transcript	XM_005628093.2	protein_coding	1	c.-1102-5543G>C
13	37939367	G	A	PASS	A	upstream_gene_variant	MODIFIER	RECQL4	482101	transcript	XM_022426517.1	protein_coding	-1	c.-2752C>T
13	37939367	G	A	PASS	A	downstream_gene_variant	MODIFIER	LRRC24	609936	transcript	XM_847288.3	protein_coding	-1	c.*2227C>T
13	37939367	G	A	PASS	A	intron_variant	MODIFIER	LRRC14	482102	transcript	XM_014118751.2	protein_coding	1	c.447+77G>A
13	37939367	G	A	PASS	A	intron_variant	MODIFIER	LRRC14	482102	transcript	XM_005628100.2	protein_coding	3	c.329+77G>A
13	37939367	G	A	PASS	A	intron_variant	MODIFIER	LRRC14	482102	transcript	XM_005628101.3	protein_coding	3	c.212+77G>A
13	37939367	G	A	PASS	A	intron_variant	MODIFIER	LRRC14	482102	transcript	XM_005628102.2	protein_coding	3	c.171+77G>A
13	37939367	G	A	PASS	A	intron_variant	MODIFIER	LRRC14	482102	transcript	XM_022426890.1	protein_coding	1	c.447+77G>A
13	37956467	G	A	PASS	A	intron_variant	MODIFIER	ARHGAP39	482103	transcript	XM_022426518.1	protein_coding	7	c.2471-2790C>T
13	37960544	G	A	PASS	A	intron_variant	MODIFIER	ARHGAP39	482103	transcript	XM_022426518.1	protein_coding	7	c.2470+923C>T
13	38005115	G	A	PASS	A	upstream_gene_variant	MODIFIER	ARHGAP39	482103	transcript	XM_022426518.1	protein_coding	-1	c.-11810C>T
13	38005115	G	A	PASS	A	intergenic_region	MODIFIER	ARHGAP39-COMMD5	482103-482105	intergenic_region	482103-482105		-1	n.38005115G>A
13	38066227	G	A	PASS	A	3_prime_UTR_variant	MODIFIER	ZNF7	475129	transcript	XM_014118754.2	protein_coding	6	c.*631C>T
13	38066227	G	A	PASS	A	3_prime_UTR_variant	MODIFIER	ZNF7	475129	transcript	XM_014118757.2	protein_coding	5	c.*631C>T
13	38066227	G	A	PASS	A	3_prime_UTR_variant	MODIFIER	ZNF7	475129	transcript	XM_014118758.2	protein_coding	5	c.*631C>T
13	38066227	G	A	PASS	A	3_prime_UTR_variant	MODIFIER	ZNF7	475129	transcript	XM_022426892.1	protein_coding	5	c.*631C>T
13	38066227	G	A	PASS	A	3_prime_UTR_variant	MODIFIER	ZNF7	475129	transcript	XM_014118756.2	protein_coding	5	c.*631C>T
13	38066227	G	A	PASS	A	3_prime_UTR_variant	MODIFIER	ZNF7	475129	transcript	XM_022426891.1	protein_coding	6	c.*631C>T
13	38066227	G	A	PASS	A	3_prime_UTR_variant	MODIFIER	ZNF7	475129	transcript	XM_005628113.3	protein_coding	5	c.*631C>T
13	38066227	G	A	PASS	A	3_prime_UTR_variant	MODIFIER	ZNF7	475129	transcript	XM_005628111.3	protein_coding	5	c.*631C>T
13	38066227	G	A	PASS	A	3_prime_UTR_variant	MODIFIER	ZNF7	475129	transcript	XM_005628110.3	protein_coding	4	c.*631C>T
13	38066227	G	A	PASS	A	3_prime_UTR_variant	MODIFIER	ZNF7	475129	transcript	XM_022426893.1	protein_coding	4	c.*631C>T
13	38219950	C	T	PASS	T	downstream_gene_variant	MODIFIER	LOC111098592	111098592	transcript	XR_002632613.1	pseudogene	-1	n.*4746C>T
13	38219950	C	T	PASS	T	downstream_gene_variant	MODIFIER	LOC111098592	111098592	transcript	XR_002632614.1	pseudogene	-1	n.*4746C>T
13	38219950	C	T	PASS	T	intron_variant	MODIFIER	C13H8orf33	610016	transcript	XM_022426519.1	protein_coding	1	c.6-1947C>T
13	38503236	G	T	PASS	T	intergenic_region	MODIFIER	LOC111098597-LIMCH1	111098597-475135	intergenic_region	111098597-475135		-1	n.38503236G>T
13	38618432	T	C	PASS	C	downstream_gene_variant	MODIFIER	LOC111098599	111098599	transcript	XR_002632627.1	pseudogene	-1	n.*2554A>G
13	38618432	T	C	PASS	C	intron_variant	MODIFIER	LIMCH1	475135	transcript	XM_022426925.1	protein_coding	3	c.265-20458T>C
13	38618432	T	C	PASS	C	intron_variant	MODIFIER	LIMCH1	475135	transcript	XM_022426926.1	protein_coding	1	c.97-20458T>C
13	38618432	T	C	PASS	C	intron_variant	MODIFIER	LIMCH1	475135	transcript	XM_022426928.1	protein_coding	3	c.265-20458T>C
13	38618432	T	C	PASS	C	intron_variant	MODIFIER	LIMCH1	475135	transcript	XM_022426930.1	protein_coding	3	c.265-20458T>C
13	38618432	T	C	PASS	C	intron_variant	MODIFIER	LIMCH1	475135	transcript	XM_022426931.1	protein_coding	3	c.265-20458T>C
13	38618432	T	C	PASS	C	intron_variant	MODIFIER	LIMCH1	475135	transcript	XM_022426932.1	protein_coding	3	c.265-20458T>C
13	38618432	T	C	PASS	C	intron_variant	MODIFIER	LIMCH1	475135	transcript	XM_022426934.1	protein_coding	3	c.265-20458T>C
13	38815146	C	T	PASS	T	3_prime_UTR_variant	MODIFIER	LIMCH1	475135	transcript	XM_022426925.1	protein_coding	32	c.*928C>T
13	38815146	C	T	PASS	T	3_prime_UTR_variant	MODIFIER	LIMCH1	475135	transcript	XM_022426930.1	protein_coding	29	c.*928C>T
13	38815146	C	T	PASS	T	3_prime_UTR_variant	MODIFIER	LIMCH1	475135	transcript	XM_022426931.1	protein_coding	28	c.*928C>T
13	38815146	C	T	PASS	T	3_prime_UTR_variant	MODIFIER	LIMCH1	475135	transcript	XM_022426932.1	protein_coding	28	c.*928C>T
13	38815146	C	T	PASS	T	3_prime_UTR_variant	MODIFIER	LIMCH1	475135	transcript	XM_022426934.1	protein_coding	27	c.*928C>T
13	38904882	A	T	PASS	T	intergenic_region	MODIFIER	PHOX2B-LOC111098600	610284-111098600	intergenic_region	610284-111098600		-1	n.38904882A>T
13	39209335	G	T	PASS	T	intergenic_region	MODIFIER	BEND4-LOC100684311	482119-100684311	intergenic_region	482119-100684311		-1	n.39209335G>T
13	40042290	TTTCCTTTCCTTTCCTTTCCTTTCCTTTCCTTTCCTTTCCTTTCC	T	PASS	T	intron_variant	MODIFIER	LOC102156700	102156700	transcript	XR_002632643.1	pseudogene	3	n.439-867_439-824delGGAAAGGAAAGGAAAGGAAAGGAAAGGAAAGGAAAGGAAAGGAA
13	40042290	TTTCCTTTCCTTTCCTTTCCTTTCCTTTCCTTTCCTTTCCTTTCC	T	PASS	T	intron_variant	MODIFIER	LOC102156700	102156700	transcript	XR_002632642.1	pseudogene	3	n.439-1112_439-1069delGGAAAGGAAAGGAAAGGAAAGGAAAGGAAAGGAAAGGAAAGGAA
13	40649644	T	G	PASS	G	intergenic_region	MODIFIER	LOC111098463-LOC102157179	111098463-102157179	intergenic_region	111098463-102157179		-1	n.40649644T>G
13	40649653	G	A	PASS	A	intergenic_region	MODIFIER	LOC111098463-LOC102157179	111098463-102157179	intergenic_region	111098463-102157179		-1	n.40649653G>A
13	40649660	G	A	PASS	A	intergenic_region	MODIFIER	LOC111098463-LOC102157179	111098463-102157179	intergenic_region	111098463-102157179		-1	n.40649660G>A
13	41322498	G	A	PASS	A	intergenic_region	MODIFIER	LOC100856188-LOC111098465	100856188-111098465	intergenic_region	100856188-111098465		-1	n.41322498G>A
13	41471836	G	A	PASS	A	intron_variant	MODIFIER	LOC111098608	111098608	transcript	XR_002632647.1	pseudogene	2	n.163+15291G>A
13	41471836	G	A	PASS	A	intron_variant	MODIFIER	LOC111098608	111098608	transcript	XR_002632648.1	pseudogene	2	n.163+15291G>A
13	41471836	G	A	PASS	A	intron_variant	MODIFIER	LOC111098608	111098608	transcript	XR_002632646.1	pseudogene	2	n.163+15291G>A
13	41947138	C	A	PASS	A	intron_variant	MODIFIER	LOC111098468	111098468	transcript	XR_002632262.1	pseudogene	1	n.63+4202C>A
13	41947138	C	A	PASS	A	intron_variant	MODIFIER	LOC111098468	111098468	transcript	XR_002632260.1	pseudogene	1	n.63+4202C>A
13	42007821	G	A	PASS	A	intron_variant	MODIFIER	LOC111098468	111098468	transcript	XR_002632261.1	pseudogene	3	n.477-20809G>A
13	42007821	G	A	PASS	A	intron_variant	MODIFIER	LOC111098467	111098467	transcript	XR_002632259.1	pseudogene	2	n.237-1149C>T
13	42007821	G	A	PASS	A	intron_variant	MODIFIER	LOC111098468	111098468	transcript	XR_002632262.1	pseudogene	3	n.297-14815G>A
13	42007821	G	A	PASS	A	intron_variant	MODIFIER	LOC111098468	111098468	transcript	XR_002632260.1	pseudogene	3	n.297-20809G>A
13	42236202	A	C	PASS	C	intron_variant	MODIFIER	GABRG1	100856619	transcript	XM_003639456.4	protein_coding	3	c.330+5821T>G
13	42236202	A	C	PASS	C	intron_variant	MODIFIER	GABRG1	100856619	transcript	XM_022426953.1	protein_coding	4	c.249+5821T>G
13	42688851	GA	G	PASS	G	intergenic_region	MODIFIER	LOC111098609-COX7B2	111098609-100687434	intergenic_region	111098609-100687434		-1	n.42688852delA
13	43142487	C	G	PASS	G	intron_variant	MODIFIER	GABRB1	100687745	transcript	XM_005628158.3	protein_coding	2	c.206+26228C>G
13	43142487	C	G	PASS	G	intron_variant	MODIFIER	GABRB1	100687745	transcript	XM_022426961.1	protein_coding	2	c.-23+947C>G
13	43214976	T	A	PASS	A	upstream_gene_variant	MODIFIER	LOC102152095	102152095	transcript	XR_002632652.1	pseudogene	-1	n.-1773A>T
13	43214976	T	A	PASS	A	intron_variant	MODIFIER	GABRB1	100687745	transcript	XM_005628158.3	protein_coding	2	c.207-35113T>A
13	43214976	T	A	PASS	A	intron_variant	MODIFIER	GABRB1	100687745	transcript	XM_022426961.1	protein_coding	2	c.-22-35113T>A
13	43659227	C	CGG	PASS	CGG	intron_variant	MODIFIER	CORIN	482135	transcript	XM_022426523.1	protein_coding	4	c.863+2568_863+2569insCC
13	44362685	GAAGGGAAGGGAAGGGAAGGGAAGGAAGGAAAGGA	G	PASS	G	intron_variant	MODIFIER	FRYL	475139	transcript	XM_022426966.1	protein_coding	41	c.5624+304_5624+337delTCCTTTCCTTCCTTCCCTTCCCTTCCCTTCCCTT
13	44362685	GAAGGGAAGGGAAGGGAAGGGAAGGAAGGAAAGGA	G	PASS	G	intron_variant	MODIFIER	FRYL	475139	transcript	XM_022426973.1	protein_coding	41	c.5324+304_5324+337delTCCTTTCCTTCCTTCCCTTCCCTTCCCTTCCCTT
13	44362685	GAAGGGAAGGGAAGGGAAGGGAAGGAAGGAAAGGA	G	PASS	G	intron_variant	MODIFIER	FRYL	475139	transcript	XM_022426972.1	protein_coding	41	c.5477+304_5477+337delTCCTTTCCTTCCTTCCCTTCCCTTCCCTTCCCTT
13	44362685	GAAGGGAAGGGAAGGGAAGGGAAGGAAGGAAAGGA	G	PASS	G	intron_variant	MODIFIER	FRYL	475139	transcript	XM_022426967.1	protein_coding	41	c.5624+304_5624+337delTCCTTTCCTTCCTTCCCTTCCCTTCCCTTCCCTT
13	44362685	GAAGGGAAGGGAAGGGAAGGGAAGGAAGGAAAGGA	G	PASS	G	intron_variant	MODIFIER	FRYL	475139	transcript	XM_022426968.1	protein_coding	41	c.5624+304_5624+337delTCCTTTCCTTCCTTCCCTTCCCTTCCCTTCCCTT
13	44362685	GAAGGGAAGGGAAGGGAAGGGAAGGAAGGAAAGGA	G	PASS	G	intron_variant	MODIFIER	FRYL	475139	transcript	XM_022426969.1	protein_coding	40	c.5579+304_5579+337delTCCTTTCCTTCCTTCCCTTCCCTTCCCTTCCCTT
13	44362685	GAAGGGAAGGGAAGGGAAGGGAAGGAAGGAAAGGA	G	PASS	G	intron_variant	MODIFIER	FRYL	475139	transcript	XM_022426974.1	protein_coding	43	c.5324+304_5324+337delTCCTTTCCTTCCTTCCCTTCCCTTCCCTTCCCTT
13	44362685	GAAGGGAAGGGAAGGGAAGGGAAGGAAGGAAAGGA	G	PASS	G	intron_variant	MODIFIER	FRYL	475139	transcript	XM_022426975.1	protein_coding	44	c.5324+304_5324+337delTCCTTTCCTTCCTTCCCTTCCCTTCCCTTCCCTT
13	44362685	GAAGGGAAGGGAAGGGAAGGGAAGGAAGGAAAGGA	G	PASS	G	intron_variant	MODIFIER	FRYL	475139	transcript	XM_022426971.1	protein_coding	40	c.5579+304_5579+337delTCCTTTCCTTCCTTCCCTTCCCTTCCCTTCCCTT
13	44362685	GAAGGGAAGGGAAGGGAAGGGAAGGAAGGAAAGGA	G	PASS	G	intron_variant	MODIFIER	FRYL	475139	transcript	XM_022426970.1	protein_coding	40	c.5579+304_5579+337delTCCTTTCCTTCCTTCCCTTCCCTTCCCTTCCCTT
13	44719777	AAC	A	PASS	A	upstream_gene_variant	MODIFIER	CWH43	482143	transcript	XM_014118650.2	protein_coding	-1	c.-4389_-4388delAC
13	44719777	AAC	A	PASS	A	intergenic_region	MODIFIER	LOC100688418-CWH43	100688418-482143	intergenic_region	100688418-482143		-1	n.44719778_44719779delAC
13	44808166	G	A	PASS	A	upstream_gene_variant	MODIFIER	DCUN1D4	611020	transcript	XM_022426978.1	protein_coding	-1	c.-4874G>A
13	44808166	G	A	PASS	A	intergenic_region	MODIFIER	CWH43-DCUN1D4	482143-611020	intergenic_region	482143-611020		-1	n.44808166G>A
13	46001731	G	A	PASS	A	missense_variant	MODERATE	SCFD2	482149	transcript	XM_844602.4	protein_coding	1	c.788C>T	p.Ala263Val
13	46001731	G	A	PASS	A	missense_variant	MODERATE	SCFD2	482149	transcript	XM_022426987.1	protein_coding	1	c.788C>T	p.Ala263Val
13	46001731	G	A	PASS	A	non_coding_transcript_exon_variant	MODIFIER	SCFD2	482149	transcript	XR_002632667.1	pseudogene	1	n.888C>T
13	46001731	G	A	PASS	A	non_coding_transcript_exon_variant	MODIFIER	SCFD2	482149	transcript	XR_002632668.1	pseudogene	1	n.888C>T
13	46387520	A	C	PASS	C	intergenic_region	MODIFIER	LOC111098427-LOC100856597	111098427-100856597	intergenic_region	111098427-100856597		-1	n.46387520A>C
13	51455561	T	TTCTTTCTTTCTTTC	PASS	TTCTTTCTTTCTTTC	intergenic_region	MODIFIER	LOC100683979-LOC111098476	100683979-111098476	intergenic_region	100683979-111098476		-1	n.51455561_51455562insTCTTTCTTTCTTTC
14	24910	T	G	PASS	G	intergenic_region	MODIFIER	LOC111098656-LOC100856521	111098656-100856521	intergenic_region	111098656-100856521		-1	n.24910T>G
14	24949	G	A	PASS	A	intergenic_region	MODIFIER	LOC111098656-LOC100856521	111098656-100856521	intergenic_region	111098656-100856521		-1	n.24949G>A
14	24956	C	T	PASS	T	intergenic_region	MODIFIER	LOC111098656-LOC100856521	111098656-100856521	intergenic_region	111098656-100856521		-1	n.24956C>T
14	550989	G	T	PASS	T	intron_variant	MODIFIER	LOC102152126	102152126	transcript	XR_293951.3	pseudogene	2	n.472+33G>T
14	550989	G	T	PASS	T	intron_variant	MODIFIER	LOC102152126	102152126	transcript	XR_001317718.2	pseudogene	2	n.513+33G>T
14	550989	G	T	PASS	T	intron_variant	MODIFIER	LOC102152126	102152126	transcript	XR_002632796.1	pseudogene	2	n.472+33G>T
14	550989	G	T	PASS	T	intron_variant	MODIFIER	LOC102152126	102152126	transcript	XR_001317719.2	pseudogene	2	n.466+33G>T
14	550989	G	T	PASS	T	intron_variant	MODIFIER	LOC102152126	102152126	transcript	XR_001317720.2	pseudogene	2	n.453+33G>T
14	12226040	G	T	PASS	T	intron_variant	MODIFIER	LOC111098738	111098738	transcript	XR_002632856.1	pseudogene	2	n.268+2244C>A
14	12226108	C	T	PASS	T	intron_variant	MODIFIER	LOC111098738	111098738	transcript	XR_002632856.1	pseudogene	2	n.268+2176G>A
14	12226112	C	T	PASS	T	intron_variant	MODIFIER	LOC111098738	111098738	transcript	XR_002632856.1	pseudogene	2	n.268+2172G>A
14	12226139	CG	C	PASS	C	intron_variant	MODIFIER	LOC111098738	111098738	transcript	XR_002632856.1	pseudogene	2	n.268+2144delC
14	12614036	A	G	PASS	G	intergenic_region	MODIFIER	LOC100683092-GRM3	100683092-100683236	intergenic_region	100683092-100683236		-1	n.12614036A>G
14	12615852	G	A	PASS	A	intergenic_region	MODIFIER	LOC100683092-GRM3	100683092-100683236	intergenic_region	100683092-100683236		-1	n.12615852G>A
14	12615895	A	C	PASS	C	intergenic_region	MODIFIER	LOC100683092-GRM3	100683092-100683236	intergenic_region	100683092-100683236		-1	n.12615895A>C
14	12617745	T	G	PASS	G	intergenic_region	MODIFIER	LOC100683092-GRM3	100683092-100683236	intergenic_region	100683092-100683236		-1	n.12617745T>G
14	12618666	A	C	PASS	C	intergenic_region	MODIFIER	LOC100683092-GRM3	100683092-100683236	intergenic_region	100683092-100683236		-1	n.12618666A>C
14	28778965	T	C	GATKstd	C	intergenic_region	MODIFIER	ETV1-LOC111098674	475246-111098674	intergenic_region	475246-111098674		-1	n.28778965T>C
14	28778966	C	T	GATKstd	T	intergenic_region	MODIFIER	ETV1-LOC111098674	475246-111098674	intergenic_region	475246-111098674		-1	n.28778966C>T
14	28778968	T	A	GATKstd	A	intergenic_region	MODIFIER	ETV1-LOC111098674	475246-111098674	intergenic_region	475246-111098674		-1	n.28778968T>A
14	44145348	T	G	PASS	G	intron_variant	MODIFIER	CCDC129	482388	transcript	XM_022427545.1	protein_coding	9	c.1295-377T>G
14	44145348	T	G	PASS	G	intron_variant	MODIFIER	CCDC129	482388	transcript	XM_014119154.2	protein_coding	9	c.1223-377T>G
14	44145348	T	G	PASS	G	intron_variant	MODIFIER	CCDC129	482388	transcript	XM_014119155.2	protein_coding	9	c.1223-377T>G
14	44145348	T	G	PASS	G	intron_variant	MODIFIER	CCDC129	482388	transcript	XM_022427546.1	protein_coding	9	c.1295-377T>G
14	44145348	T	G	PASS	G	intron_variant	MODIFIER	CCDC129	482388	transcript	XM_014119157.2	protein_coding	8	c.1076-377T>G
14	44145348	T	G	PASS	G	intron_variant	MODIFIER	CCDC129	482388	transcript	XM_014119158.2	protein_coding	7	c.1046-377T>G
14	50017356	C	G	PASS	G	intergenic_region	MODIFIER	LOC100686196-LOC111098699	100686196-111098699	intergenic_region	100686196-111098699		-1	n.50017356C>G
15	200593	A	T	PASS	T	intergenic_region	MODIFIER	LOC102156033-LOC100856573	102156033-100856573	intergenic_region	102156033-100856573		-1	n.200593A>T
15	464126	C	T	PASS	T	upstream_gene_variant	MODIFIER	SLC2A1	482437	transcript	NM_001159326.1	protein_coding	-1	c.-56C>T
15	464126	C	T	PASS	T	intron_variant	MODIFIER	SLC2A1	482437	transcript	XM_022427664.1	protein_coding	1	c.-19+737C>T
15	1091156	C	T	PASS	T	downstream_gene_variant	MODIFIER	GUCA2B	100684829	transcript	XM_003431950.3	protein_coding	-1	c.*3295G>A
15	1091156	C	T	PASS	T	intron_variant	MODIFIER	GUCA2A	482446	transcript	NM_001198788.1	protein_coding	2	c.272-57C>T
15	1380781	T	C	PASS	C	intron_variant	MODIFIER	HIVEP3	100684978	transcript	XM_003431951.4	protein_coding	3	c.-843+54431T>C
15	1762770	C	T	PASS	T	non_coding_transcript_exon_variant	MODIFIER	LOC102151836	102151836	transcript	XR_002633286.1	pseudogene	5	n.2855G>A
15	1762770	C	T	PASS	T	non_coding_transcript_exon_variant	MODIFIER	LOC102151836	102151836	transcript	XR_001317846.2	pseudogene	4	n.1695G>A
15	1762770	C	T	PASS	T	non_coding_transcript_exon_variant	MODIFIER	LOC102151836	102151836	transcript	XR_002633285.1	pseudogene	5	n.1776G>A
15	1762770	C	T	PASS	T	non_coding_transcript_exon_variant	MODIFIER	LOC102151836	102151836	transcript	XR_002633287.1	pseudogene	5	n.1819G>A
15	1762770	C	T	PASS	T	non_coding_transcript_exon_variant	MODIFIER	LOC102151836	102151836	transcript	XR_002633283.1	pseudogene	5	n.1871G>A
15	1762770	C	T	PASS	T	non_coding_transcript_exon_variant	MODIFIER	LOC102151836	102151836	transcript	XR_002633284.1	pseudogene	5	n.1914G>A
15	1762770	C	T	PASS	T	non_coding_transcript_exon_variant	MODIFIER	LOC102151836	102151836	transcript	XR_002633288.1	pseudogene	5	n.1883G>A
15	2078297	A	C	PASS	C	intron_variant	MODIFIER	CTPS1	100687720	transcript	XM_003432005.3	protein_coding	8	c.1006-915T>G
15	2333026	G	A	PASS	A	intron_variant	MODIFIER	NFYC	475312	transcript	XM_005628865.3	protein_coding	1	c.-9+1747C>T
15	2504689	T	A	PASS	A	upstream_gene_variant	MODIFIER	LOC482454	482454	transcript	XM_022427748.1	protein_coding	-1	c.-18520A>T
15	2504689	T	A	PASS	A	upstream_gene_variant	MODIFIER	EXO5	475314	transcript	XM_022427747.1	protein_coding	-1	c.-5873A>T
15	2504689	T	A	PASS	A	upstream_gene_variant	MODIFIER	LOC100685508	100685508	transcript	100685508	pseudogene	-1	n.-530T>A
15	2504689	T	A	PASS	A	non_coding_transcript_exon_variant	MODIFIER	LOC111098945	111098945	transcript	XR_002633302.1	pseudogene	3	n.2430A>T
15	2653587	G	A	PASS	A	intron_variant	MODIFIER	COL9A2	607609	transcript	NM_001197170.1	protein_coding	17	c.789+638G>A
15	2653589	G	T	PASS	T	intron_variant	MODIFIER	COL9A2	607609	transcript	NM_001197170.1	protein_coding	17	c.789+640G>T
15	3324490	C	T	PASS	T	downstream_gene_variant	MODIFIER	LOC100855618	100855618	transcript	XM_022427787.1	protein_coding	-1	c.*3036G>A
15	3324490	C	T	PASS	T	intron_variant	MODIFIER	LOC102156058	102156058	transcript	XR_002633330.1	pseudogene	8	n.4561-706C>T
15	3324490	C	T	PASS	T	intron_variant	MODIFIER	LOC102156058	102156058	transcript	XR_002633307.1	pseudogene	8	n.4590-706C>T
15	3324490	C	T	PASS	T	intron_variant	MODIFIER	LOC102156058	102156058	transcript	XR_002633308.1	pseudogene	8	n.4550-706C>T
15	3324490	C	T	PASS	T	intron_variant	MODIFIER	LOC102156058	102156058	transcript	XR_002633310.1	pseudogene	8	n.4586-706C>T
15	3324490	C	T	PASS	T	intron_variant	MODIFIER	LOC102156058	102156058	transcript	XR_002633311.1	pseudogene	8	n.4627-706C>T
15	3324490	C	T	PASS	T	intron_variant	MODIFIER	LOC102156058	102156058	transcript	XR_002633314.1	pseudogene	8	n.4561-706C>T
15	3324490	C	T	PASS	T	intron_variant	MODIFIER	LOC102156058	102156058	transcript	XR_002633315.1	pseudogene	8	n.4557-706C>T
15	3324490	C	T	PASS	T	intron_variant	MODIFIER	LOC102156058	102156058	transcript	XR_002633316.1	pseudogene	8	n.5444-706C>T
15	3324490	C	T	PASS	T	intron_variant	MODIFIER	LOC102156058	102156058	transcript	XR_002633317.1	pseudogene	9	n.4110-706C>T
15	3324490	C	T	PASS	T	intron_variant	MODIFIER	LOC102156058	102156058	transcript	XR_002633319.1	pseudogene	8	n.5407-706C>T
15	3324490	C	T	PASS	T	intron_variant	MODIFIER	LOC102156058	102156058	transcript	XR_002633320.1	pseudogene	9	n.3636-706C>T
15	3324490	C	T	PASS	T	intron_variant	MODIFIER	LOC102156058	102156058	transcript	XR_002633321.1	pseudogene	9	n.4147-706C>T
15	3324490	C	T	PASS	T	intron_variant	MODIFIER	LOC102156058	102156058	transcript	XR_002633322.1	pseudogene	10	n.3156-706C>T
15	3324490	C	T	PASS	T	intron_variant	MODIFIER	LOC102156058	102156058	transcript	XR_002633323.1	pseudogene	8	n.4487-706C>T
15	3324490	C	T	PASS	T	intron_variant	MODIFIER	LOC102156058	102156058	transcript	XR_002633324.1	pseudogene	9	n.4927-706C>T
15	3324490	C	T	PASS	T	intron_variant	MODIFIER	LOC102156058	102156058	transcript	XR_002633325.1	pseudogene	8	n.2786-706C>T
15	3324490	C	T	PASS	T	intron_variant	MODIFIER	LOC102156058	102156058	transcript	XR_002633326.1	pseudogene	9	n.3074-706C>T
15	3324490	C	T	PASS	T	intron_variant	MODIFIER	LOC102156058	102156058	transcript	XR_002633327.1	pseudogene	8	n.2746-706C>T
15	3324490	C	T	PASS	T	intron_variant	MODIFIER	LOC102156058	102156058	transcript	XR_002633328.1	pseudogene	9	n.3533-706C>T
15	3324490	C	T	PASS	T	intron_variant	MODIFIER	LOC102156058	102156058	transcript	XR_002633329.1	pseudogene	9	n.3111-706C>T
15	3324490	C	T	PASS	T	intron_variant	MODIFIER	LOC102156058	102156058	transcript	XR_002633331.1	pseudogene	9	n.3891-706C>T
15	3324490	C	T	PASS	T	intron_variant	MODIFIER	LOC102156058	102156058	transcript	XR_002633333.1	pseudogene	9	n.2971-706C>T
15	3324490	C	T	PASS	T	intron_variant	MODIFIER	LOC102156058	102156058	transcript	XR_002633334.1	pseudogene	7	n.4457-706C>T
15	3324490	C	T	PASS	T	intron_variant	MODIFIER	LOC102156058	102156058	transcript	XR_002633335.1	pseudogene	8	n.2976-706C>T
15	3324490	C	T	PASS	T	intron_variant	MODIFIER	LOC102156058	102156058	transcript	XR_002633313.1	pseudogene	8	n.4841-706C>T
15	3324490	C	T	PASS	T	intron_variant	MODIFIER	LOC102156058	102156058	transcript	XR_002633332.1	pseudogene	9	n.4910-706C>T
15	3324490	C	T	PASS	T	intron_variant	MODIFIER	LOC102156058	102156058	transcript	XR_002633336.1	pseudogene	9	n.4902-706C>T
15	3324490	C	T	PASS	T	non_coding_transcript_exon_variant	MODIFIER	LOC102156058	102156058	transcript	XR_002633309.1	pseudogene	9	n.5039C>T
15	3324490	C	T	PASS	T	non_coding_transcript_exon_variant	MODIFIER	LOC102156058	102156058	transcript	XR_002633312.1	pseudogene	9	n.5035C>T
15	3567825	G	C	PASS	C	intron_variant	MODIFIER	MACF1	475321	transcript	XM_022427800.1	protein_coding	2	c.171+5258C>G
15	3567825	G	C	PASS	C	intron_variant	MODIFIER	MACF1	475321	transcript	XM_014119325.2	protein_coding	2	c.282+5258C>G
15	3567825	G	C	PASS	C	intron_variant	MODIFIER	MACF1	475321	transcript	XM_022427795.1	protein_coding	2	c.282+5258C>G
15	3567825	G	C	PASS	C	intron_variant	MODIFIER	MACF1	475321	transcript	XM_022427797.1	protein_coding	2	c.282+5258C>G
15	3567825	G	C	PASS	C	intron_variant	MODIFIER	MACF1	475321	transcript	XM_005628918.3	protein_coding	2	c.282+5258C>G
15	3567825	G	C	PASS	C	intron_variant	MODIFIER	MACF1	475321	transcript	XM_005628920.3	protein_coding	2	c.282+5258C>G
15	3567825	G	C	PASS	C	intron_variant	MODIFIER	MACF1	475321	transcript	XM_844059.6	protein_coding	2	c.282+5258C>G
15	3632872	A	AT	PASS	AT	intron_variant	MODIFIER	MACF1	475321	transcript	XM_014119325.2	protein_coding	1	c.221-59729_221-59728insA
15	3632872	A	AT	PASS	AT	intron_variant	MODIFIER	MACF1	475321	transcript	XM_022427795.1	protein_coding	1	c.221-59729_221-59728insA
15	3632872	A	AT	PASS	AT	intron_variant	MODIFIER	MACF1	475321	transcript	XM_022427797.1	protein_coding	1	c.221-59729_221-59728insA
15	3632872	A	AT	PASS	AT	intron_variant	MODIFIER	MACF1	475321	transcript	XM_005628918.3	protein_coding	1	c.221-59729_221-59728insA
15	3632872	A	AT	PASS	AT	intron_variant	MODIFIER	MACF1	475321	transcript	XM_005628920.3	protein_coding	1	c.221-59729_221-59728insA
15	3632872	A	AT	PASS	AT	intron_variant	MODIFIER	MACF1	475321	transcript	XM_844059.6	protein_coding	1	c.221-59729_221-59728insA
15	3632876	T	C	PASS	C	intron_variant	MODIFIER	MACF1	475321	transcript	XM_014119325.2	protein_coding	1	c.221-59732A>G
15	3632876	T	C	PASS	C	intron_variant	MODIFIER	MACF1	475321	transcript	XM_022427795.1	protein_coding	1	c.221-59732A>G
15	3632876	T	C	PASS	C	intron_variant	MODIFIER	MACF1	475321	transcript	XM_022427797.1	protein_coding	1	c.221-59732A>G
15	3632876	T	C	PASS	C	intron_variant	MODIFIER	MACF1	475321	transcript	XM_005628918.3	protein_coding	1	c.221-59732A>G
15	3632876	T	C	PASS	C	intron_variant	MODIFIER	MACF1	475321	transcript	XM_005628920.3	protein_coding	1	c.221-59732A>G
15	3632876	T	C	PASS	C	intron_variant	MODIFIER	MACF1	475321	transcript	XM_844059.6	protein_coding	1	c.221-59732A>G
15	3660614	T	G	PASS	G	intron_variant	MODIFIER	MACF1	475321	transcript	XM_014119325.2	protein_coding	1	c.220+43043A>C
15	3660614	T	G	PASS	G	intron_variant	MODIFIER	MACF1	475321	transcript	XM_022427795.1	protein_coding	1	c.220+43043A>C
15	3660614	T	G	PASS	G	intron_variant	MODIFIER	MACF1	475321	transcript	XM_022427797.1	protein_coding	1	c.220+43043A>C
15	3660614	T	G	PASS	G	intron_variant	MODIFIER	MACF1	475321	transcript	XM_005628918.3	protein_coding	1	c.220+43043A>C
15	3660614	T	G	PASS	G	intron_variant	MODIFIER	MACF1	475321	transcript	XM_005628920.3	protein_coding	1	c.220+43043A>C
15	3660614	T	G	PASS	G	intron_variant	MODIFIER	MACF1	475321	transcript	XM_844059.6	protein_coding	1	c.220+43043A>C
15	3799119	G	GGAA	PASS	GGAA	intergenic_region	MODIFIER	AKIRIN1-RHBDL2	607354-482466	intergenic_region	607354-482466		-1	n.3799119_3799120insGAA
15	3799122	GTAGT	G	PASS	G	intergenic_region	MODIFIER	AKIRIN1-RHBDL2	607354-482466	intergenic_region	607354-482466		-1	n.3799123_3799126delTAGT
15	3799129	T	TTCTTCACCCC	PASS	TTCTTCACCCC	intergenic_region	MODIFIER	AKIRIN1-RHBDL2	607354-482466	intergenic_region	607354-482466		-1	n.3799129_3799130insTCTTCACCCC
15	4185493	C	T	PASS	T	intergenic_region	MODIFIER	LOC111098952-LOC102151582	111098952-102151582	intergenic_region	111098952-102151582		-1	n.4185493C>T
15	4627015	G	A	PASS	A	upstream_gene_variant	MODIFIER	LOC111098953	111098953	transcript	XR_002633359.1	pseudogene	-1	n.-134C>T
15	4627015	G	A	PASS	A	upstream_gene_variant	MODIFIER	INPP5B	100686373	transcript	XM_022427813.1	protein_coding	-1	c.-1283G>A
15	4627015	G	A	PASS	A	intergenic_region	MODIFIER	LOC111098953-INPP5B	111098953-100686373	intergenic_region	111098953-100686373		-1	n.4627015G>A
15	5016605	CTGTGCCCCCCGGGTATGTCAGCCCCTCCA	C	PASS	C	intergenic_region	MODIFIER	ZC3H12A-LOC102152983	608211-102152983	intergenic_region	608211-102152983		-1	n.5016606_5016634delTGTGCCCCCCGGGTATGTCAGCCCCTCCA
15	5016656	CCCCCCACCCCTGTGCCCCCTGGGCATGTCAG	C	PASS	C	intergenic_region	MODIFIER	ZC3H12A-LOC102152983	608211-102152983	intergenic_region	608211-102152983		-1	n.5016657_5016687delCCCCCACCCCTGTGCCCCCTGGGCATGTCAG
15	5567884	C	T	PASS	T	intergenic_region	MODIFIER	GRIK3-CSF3R	608269-607605	intergenic_region	608269-607605		-1	n.5567884C>T
15	6413360	T	TATTC	PASS	TATTC	intron_variant	MODIFIER	CLSPN	482481	transcript	XM_539598.5	protein_coding	8	c.1586-474_1586-473insATTC
15	6805633	G	GA	PASS	GA	intergenic_region	MODIFIER	ZMYM4-LOC111098960	482484-111098960	intergenic_region	482484-111098960		-1	n.6805633_6805634insA
15	7611976	T	A	PASS	A	intergenic_region	MODIFIER	LOC111098882-C15H1orf94	111098882-475343	intergenic_region	111098882-475343		-1	n.7611976T>A
15	7775190	T	TATATTTATAAATATATCTGCTGGG	PASS	TATATTTATAAATATATCTGCTGGG	intron_variant	MODIFIER	CSMD2	609494	transcript	XM_022403576.1	protein_coding	2	c.320+14971_320+14972insATATTTATAAATATATCTGCTGGG
15	8373584	C	T	PASS	T	intergenic_region	MODIFIER	LOC111098964-MYLK3	111098964-475345	intergenic_region	111098964-475345		-1	n.8373584C>T
15	9790528	A	G	PASS	G	intergenic_region	MODIFIER	OSBPL9-LOC111098969	475355-111098969	intergenic_region	475355-111098969		-1	n.9790528A>G
15	10226817	T	TCAGATGGGGG	PASS	TCAGATGGGGG	upstream_gene_variant	MODIFIER	CDKN2C	475359	transcript	XM_005629013.2	protein_coding	-1	c.-2552_-2551insCCCCCATCTG
15	10226817	T	TCAGATGGGGG	PASS	TCAGATGGGGG	intergenic_region	MODIFIER	CDKN2C-FAF1	475359-608231	intergenic_region	475359-608231		-1	n.10226817_10226818insCAGATGGGGG
15	10456942	G	A	PASS	A	intron_variant	MODIFIER	FAF1	608231	transcript	XM_844729.5	protein_coding	6	c.549-821G>A
15	10461151	T	A	PASS	A	intron_variant	MODIFIER	FAF1	608231	transcript	XM_844729.5	protein_coding	7	c.654+3283T>A
15	11350470	G	A	PASS	A	intron_variant	MODIFIER	AGBL4	610123	transcript	XM_022427936.1	protein_coding	3	c.282+4517G>A
15	11350470	G	A	PASS	A	intron_variant	MODIFIER	AGBL4	610123	transcript	XM_022427944.1	protein_coding	3	c.282+4517G>A
15	11350470	G	A	PASS	A	intron_variant	MODIFIER	AGBL4	610123	transcript	XM_022427946.1	protein_coding	3	c.282+4517G>A
15	11350470	G	A	PASS	A	intron_variant	MODIFIER	AGBL4	610123	transcript	XM_022427939.1	protein_coding	3	c.282+4517G>A
15	11350470	G	A	PASS	A	intron_variant	MODIFIER	AGBL4	610123	transcript	XM_022427947.1	protein_coding	3	c.282+4517G>A
15	11350470	G	A	PASS	A	intron_variant	MODIFIER	AGBL4	610123	transcript	XM_847536.4	protein_coding	3	c.282+4517G>A
15	11350470	G	A	PASS	A	intron_variant	MODIFIER	AGBL4	610123	transcript	XR_002633401.1	pseudogene	3	n.350+4517G>A
15	11350470	G	A	PASS	A	intron_variant	MODIFIER	AGBL4	610123	transcript	XM_022427938.1	protein_coding	3	c.282+4517G>A
15	11350470	G	A	PASS	A	intron_variant	MODIFIER	AGBL4	610123	transcript	XM_022427940.1	protein_coding	3	c.282+4517G>A
15	11350470	G	A	PASS	A	intron_variant	MODIFIER	AGBL4	610123	transcript	XM_022427941.1	protein_coding	1	c.105+148141G>A
15	11408711	C	A	PASS	A	intron_variant	MODIFIER	AGBL4	610123	transcript	XM_022427936.1	protein_coding	3	c.282+62758C>A
15	11408711	C	A	PASS	A	intron_variant	MODIFIER	AGBL4	610123	transcript	XM_022427944.1	protein_coding	3	c.282+62758C>A
15	11408711	C	A	PASS	A	intron_variant	MODIFIER	AGBL4	610123	transcript	XM_022427946.1	protein_coding	3	c.282+62758C>A
15	11408711	C	A	PASS	A	intron_variant	MODIFIER	AGBL4	610123	transcript	XM_022427939.1	protein_coding	3	c.282+62758C>A
15	11408711	C	A	PASS	A	intron_variant	MODIFIER	AGBL4	610123	transcript	XM_022427947.1	protein_coding	3	c.282+62758C>A
15	11408711	C	A	PASS	A	intron_variant	MODIFIER	AGBL4	610123	transcript	XM_847536.4	protein_coding	3	c.282+62758C>A
15	11408711	C	A	PASS	A	intron_variant	MODIFIER	AGBL4	610123	transcript	XR_002633401.1	pseudogene	3	n.350+62758C>A
15	11408711	C	A	PASS	A	intron_variant	MODIFIER	AGBL4	610123	transcript	XM_022427938.1	protein_coding	3	c.282+62758C>A
15	11408711	C	A	PASS	A	intron_variant	MODIFIER	AGBL4	610123	transcript	XM_022427940.1	protein_coding	3	c.282+62758C>A
15	11408711	C	A	PASS	A	intron_variant	MODIFIER	AGBL4	610123	transcript	XM_022427941.1	protein_coding	1	c.105+206382C>A
15	11978677	T	C	PASS	C	intron_variant	MODIFIER	AGBL4	610123	transcript	XM_022427936.1	protein_coding	5	c.594+26021T>C
15	11978677	T	C	PASS	C	intron_variant	MODIFIER	AGBL4	610123	transcript	XM_022427944.1	protein_coding	5	c.594+26021T>C
15	11978677	T	C	PASS	C	intron_variant	MODIFIER	AGBL4	610123	transcript	XM_022427946.1	protein_coding	5	c.594+26021T>C
15	11978677	T	C	PASS	C	intron_variant	MODIFIER	AGBL4	610123	transcript	XM_022427939.1	protein_coding	5	c.594+26021T>C
15	11978677	T	C	PASS	C	intron_variant	MODIFIER	AGBL4	610123	transcript	XM_022427947.1	protein_coding	5	c.594+26021T>C
15	11978677	T	C	PASS	C	intron_variant	MODIFIER	AGBL4	610123	transcript	XM_847536.4	protein_coding	5	c.594+26021T>C
15	11978677	T	C	PASS	C	intron_variant	MODIFIER	AGBL4	610123	transcript	XR_002633401.1	pseudogene	5	n.662+26021T>C
15	11978677	T	C	PASS	C	intron_variant	MODIFIER	AGBL4	610123	transcript	XM_022427938.1	protein_coding	5	c.594+26021T>C
15	11978677	T	C	PASS	C	intron_variant	MODIFIER	AGBL4	610123	transcript	XM_022427940.1	protein_coding	5	c.594+26021T>C
15	11978677	T	C	PASS	C	intron_variant	MODIFIER	AGBL4	610123	transcript	XM_022427941.1	protein_coding	3	c.417+26021T>C
15	11978677	T	C	PASS	C	intron_variant	MODIFIER	AGBL4	610123	transcript	XM_022427943.1	protein_coding	3	c.318+26021T>C
15	11978677	T	C	PASS	C	intron_variant	MODIFIER	AGBL4	610123	transcript	XM_022427942.1	protein_coding	3	c.405+26021T>C
15	11978677	T	C	PASS	C	intron_variant	MODIFIER	AGBL4	610123	transcript	XM_022427945.1	protein_coding	3	c.240+26021T>C
15	12194756	G	A	PASS	A	upstream_gene_variant	MODIFIER	AGBL4	610123	transcript	XM_022427950.1	protein_coding	-1	c.-7042G>A
15	12194756	G	A	PASS	A	upstream_gene_variant	MODIFIER	AGBL4	610123	transcript	XM_022427951.1	protein_coding	-1	c.-7042G>A
15	12194756	G	A	PASS	A	intron_variant	MODIFIER	AGBL4	610123	transcript	XM_022427936.1	protein_coding	6	c.635-19179G>A
15	12194756	G	A	PASS	A	intron_variant	MODIFIER	AGBL4	610123	transcript	XM_022427944.1	protein_coding	6	c.635-19179G>A
15	12194756	G	A	PASS	A	intron_variant	MODIFIER	AGBL4	610123	transcript	XM_022427946.1	protein_coding	6	c.635-19179G>A
15	12194756	G	A	PASS	A	intron_variant	MODIFIER	AGBL4	610123	transcript	XM_022427939.1	protein_coding	6	c.635-19179G>A
15	12194756	G	A	PASS	A	intron_variant	MODIFIER	AGBL4	610123	transcript	XM_022427947.1	protein_coding	6	c.634+73093G>A
15	12194756	G	A	PASS	A	intron_variant	MODIFIER	AGBL4	610123	transcript	XM_847536.4	protein_coding	6	c.634+73093G>A
15	12194756	G	A	PASS	A	intron_variant	MODIFIER	AGBL4	610123	transcript	XR_002633401.1	pseudogene	6	n.703-19179G>A
15	12194756	G	A	PASS	A	intron_variant	MODIFIER	AGBL4	610123	transcript	XM_022427938.1	protein_coding	6	c.635-19179G>A
15	12194756	G	A	PASS	A	intron_variant	MODIFIER	AGBL4	610123	transcript	XM_022427940.1	protein_coding	6	c.635-19179G>A
15	12194756	G	A	PASS	A	intron_variant	MODIFIER	AGBL4	610123	transcript	XM_022427941.1	protein_coding	4	c.458-19179G>A
15	12194756	G	A	PASS	A	intron_variant	MODIFIER	AGBL4	610123	transcript	XM_022427943.1	protein_coding	4	c.359-19179G>A
15	12194756	G	A	PASS	A	intron_variant	MODIFIER	AGBL4	610123	transcript	XM_022427942.1	protein_coding	4	c.446-19179G>A
15	12194756	G	A	PASS	A	intron_variant	MODIFIER	AGBL4	610123	transcript	XM_022427945.1	protein_coding	4	c.281-19179G>A
15	12771033	C	T	PASS	T	intergenic_region	MODIFIER	LOC111098975-TRABD2B	111098975-610174	intergenic_region	111098975-610174		-1	n.12771033C>T
15	12813586	C	T	PASS	T	intron_variant	MODIFIER	TRABD2B	610174	transcript	XM_022403581.1	protein_coding	1	c.612+34438C>T
15	13643628	G	A	PASS	A	intron_variant	MODIFIER	CYP4A38	475366	transcript	NM_001048017.1	protein_coding	2	c.337+1634G>A
15	13643628	G	A	PASS	A	intron_variant	MODIFIER	CYP4A38	475366	transcript	XM_005628834.3	protein_coding	2	c.337+1634G>A
15	13643628	G	A	PASS	A	intron_variant	MODIFIER	CYP4A38	475366	transcript	XM_005628835.3	protein_coding	2	c.337+1634G>A
15	16138183	T	G	PASS	G	downstream_gene_variant	MODIFIER	LOC102152460	102152460	transcript	XM_005629094.3	protein_coding	-1	c.*4571T>G
15	16138183	T	G	PASS	G	intergenic_region	MODIFIER	LOC102152460-KLF17	102152460-100684979	intergenic_region	102152460-100684979		-1	n.16138183T>G
15	16187213	G	C	PASS	C	intergenic_region	MODIFIER	KLF17-LOC111098989	100684979-111098989	intergenic_region	100684979-111098989		-1	n.16187213G>C
15	16438802	G	A	PASS	A	upstream_gene_variant	MODIFIER	ST3GAL3	610736	transcript	XM_022428053.1	protein_coding	-1	c.-4561C>T
15	16438802	G	A	PASS	A	intergenic_region	MODIFIER	ST3GAL3-KDM4A	610736-482530	intergenic_region	610736-482530		-1	n.16438802G>A
15	16539588	G	A	PASS	A	intron_variant	MODIFIER	KDM4A	482530	transcript	XM_005629106.3	protein_coding	12	c.1861+1474C>T
15	16539588	G	A	PASS	A	intron_variant	MODIFIER	KDM4A	482530	transcript	XM_022428055.1	protein_coding	11	c.1861+1474C>T
15	16539588	G	A	PASS	A	intron_variant	MODIFIER	KDM4A	482530	transcript	XM_005629107.3	protein_coding	12	c.1861+1474C>T
15	16539588	G	A	PASS	A	intron_variant	MODIFIER	KDM4A	482530	transcript	XM_005629108.3	protein_coding	12	c.1861+1474C>T
15	16539588	G	A	PASS	A	intron_variant	MODIFIER	KDM4A	482530	transcript	XM_845912.5	protein_coding	12	c.1861+1474C>T
15	16539588	G	A	PASS	A	intron_variant	MODIFIER	KDM4A	482530	transcript	XM_022428057.1	protein_coding	11	c.1861+1474C>T
15	16539588	G	A	PASS	A	intron_variant	MODIFIER	KDM4A	482530	transcript	XM_022428056.1	protein_coding	11	c.1861+1474C>T
15	16551387	G	A	PASS	A	intron_variant	MODIFIER	KDM4A	482530	transcript	XM_005629106.3	protein_coding	11	c.1740+2704C>T
15	16551387	G	A	PASS	A	intron_variant	MODIFIER	KDM4A	482530	transcript	XM_022428055.1	protein_coding	10	c.1740+2704C>T
15	16551387	G	A	PASS	A	intron_variant	MODIFIER	KDM4A	482530	transcript	XM_005629107.3	protein_coding	11	c.1740+2704C>T
15	16551387	G	A	PASS	A	intron_variant	MODIFIER	KDM4A	482530	transcript	XM_005629108.3	protein_coding	11	c.1740+2704C>T
15	16551387	G	A	PASS	A	intron_variant	MODIFIER	KDM4A	482530	transcript	XM_845912.5	protein_coding	11	c.1740+2704C>T
15	16551387	G	A	PASS	A	intron_variant	MODIFIER	KDM4A	482530	transcript	XM_022428057.1	protein_coding	10	c.1740+2704C>T
15	16551387	G	A	PASS	A	intron_variant	MODIFIER	KDM4A	482530	transcript	XM_022428056.1	protein_coding	10	c.1740+2704C>T
15	17016309	A	G	PASS	G	intergenic_region	MODIFIER	FAM183A-LOC102155764	100685382-102155764	intergenic_region	100685382-102155764		-1	n.17016309A>G
15	17174232	A	AAAG	PASS	AAAG	intergenic_region	MODIFIER	LOC111098996-LOC111098997	111098996-111098997	intergenic_region	111098996-111098997		-1	n.17174232_17174233insAAG
15	17733210	G	A	PASS	A	intron_variant	MODIFIER	TEP1	482555	transcript	XM_022428083.1	protein_coding	16	c.2460-277C>T
15	17733210	G	A	PASS	A	intron_variant	MODIFIER	TEP1	482555	transcript	XM_022428084.1	protein_coding	16	c.2460-277C>T
15	17733210	G	A	PASS	A	intron_variant	MODIFIER	TEP1	482555	transcript	XM_022428085.1	protein_coding	16	c.2460-277C>T
15	17812419	TC	T	PASS	T	intron_variant	MODIFIER	PNP	475393	transcript	XM_532617.4	protein_coding	2	c.182-1505delC
15	18251561	T	TTCATTCATTC	PASS	TTCATTCATTC	intron_variant	MODIFIER	HNRNPC	475399	transcript	XM_014119468.2	protein_coding	4	c.444-9744_444-9743insGAATGAATGA
15	18251561	T	TTCATTCATTC	PASS	TTCATTCATTC	intron_variant	MODIFIER	HNRNPC	475399	transcript	XM_014119472.2	protein_coding	4	c.405-9744_405-9743insGAATGAATGA
15	18251561	T	TTCATTCATTC	PASS	TTCATTCATTC	intron_variant	MODIFIER	HNRNPC	475399	transcript	XM_005629154.3	protein_coding	4	c.444-9744_444-9743insGAATGAATGA
15	18251561	T	TTCATTCATTC	PASS	TTCATTCATTC	intron_variant	MODIFIER	HNRNPC	475399	transcript	XM_014119474.2	protein_coding	4	c.405-9744_405-9743insGAATGAATGA
15	18251561	T	TTCATTCATTC	PASS	TTCATTCATTC	intron_variant	MODIFIER	HNRNPC	475399	transcript	XM_022428104.1	protein_coding	4	c.444-9744_444-9743insGAATGAATGA
15	18251561	T	TTCATTCATTC	PASS	TTCATTCATTC	intron_variant	MODIFIER	HNRNPC	475399	transcript	XM_858338.5	protein_coding	4	c.405-9744_405-9743insGAATGAATGA
15	18251561	T	TTCATTCATTC	PASS	TTCATTCATTC	intron_variant	MODIFIER	HNRNPC	475399	transcript	XM_003432012.4	protein_coding	4	c.366-9744_366-9743insGAATGAATGA
15	18251561	T	TTCATTCATTC	PASS	TTCATTCATTC	intron_variant	MODIFIER	HNRNPC	475399	transcript	XM_014119475.2	protein_coding	4	c.405-9744_405-9743insGAATGAATGA
15	18251561	T	TTCATTCATTC	PASS	TTCATTCATTC	intron_variant	MODIFIER	HNRNPC	475399	transcript	XM_014119470.2	protein_coding	6	c.405-9744_405-9743insGAATGAATGA
15	18251561	T	TTCATTCATTC	PASS	TTCATTCATTC	intron_variant	MODIFIER	HNRNPC	475399	transcript	XM_014119471.2	protein_coding	5	c.405-9744_405-9743insGAATGAATGA
15	18251561	T	TTCATTCATTC	PASS	TTCATTCATTC	intron_variant	MODIFIER	HNRNPC	475399	transcript	XM_022428103.1	protein_coding	7	c.405-9744_405-9743insGAATGAATGA
15	18251561	T	TTCATTCATTC	PASS	TTCATTCATTC	intron_variant	MODIFIER	HNRNPC	475399	transcript	XM_014119469.2	protein_coding	5	c.405-9744_405-9743insGAATGAATGA
15	18252713	G	A	PASS	A	intron_variant	MODIFIER	HNRNPC	475399	transcript	XM_014119468.2	protein_coding	4	c.443+9648C>T
15	18252713	G	A	PASS	A	intron_variant	MODIFIER	HNRNPC	475399	transcript	XM_014119472.2	protein_coding	4	c.404+9648C>T
15	18252713	G	A	PASS	A	intron_variant	MODIFIER	HNRNPC	475399	transcript	XM_005629154.3	protein_coding	4	c.443+9648C>T
15	18252713	G	A	PASS	A	intron_variant	MODIFIER	HNRNPC	475399	transcript	XM_014119474.2	protein_coding	4	c.404+9648C>T
15	18252713	G	A	PASS	A	intron_variant	MODIFIER	HNRNPC	475399	transcript	XM_022428104.1	protein_coding	4	c.443+9648C>T
15	18252713	G	A	PASS	A	intron_variant	MODIFIER	HNRNPC	475399	transcript	XM_858338.5	protein_coding	4	c.404+9648C>T
15	18252713	G	A	PASS	A	intron_variant	MODIFIER	HNRNPC	475399	transcript	XM_003432012.4	protein_coding	4	c.365+9648C>T
15	18252713	G	A	PASS	A	intron_variant	MODIFIER	HNRNPC	475399	transcript	XM_014119475.2	protein_coding	4	c.404+9648C>T
15	18252713	G	A	PASS	A	intron_variant	MODIFIER	HNRNPC	475399	transcript	XM_014119470.2	protein_coding	6	c.404+9648C>T
15	18252713	G	A	PASS	A	intron_variant	MODIFIER	HNRNPC	475399	transcript	XM_014119471.2	protein_coding	5	c.404+9648C>T
15	18252713	G	A	PASS	A	intron_variant	MODIFIER	HNRNPC	475399	transcript	XM_022428103.1	protein_coding	7	c.404+9648C>T
15	18252713	G	A	PASS	A	intron_variant	MODIFIER	HNRNPC	475399	transcript	XM_014119469.2	protein_coding	5	c.404+9648C>T
15	18343681	C	T	PASS	T	intron_variant	MODIFIER	RPGRIP1	475400	transcript	NM_001313773.1	protein_coding	7	c.688-252C>T
15	18343681	C	T	PASS	T	intron_variant	MODIFIER	RPGRIP1	475400	transcript	XM_022427662.1	protein_coding	7	c.688-252C>T
15	18594019	A	G	PASS	G	intergenic_region	MODIFIER	LOC100688286-LOC482570	100688286-482570	intergenic_region	100688286-482570		-1	n.18594019A>G
15	18703344	T	A	PASS	A	downstream_gene_variant	MODIFIER	LOC111099007	111099007	transcript	XR_002633493.1	pseudogene	-1	n.*3807A>T
15	18703344	T	A	PASS	A	intron_variant	MODIFIER	LOC475405	475405	transcript	XM_846783.5	protein_coding	2	c.258+450A>T
15	18703344	T	A	PASS	A	intron_variant	MODIFIER	LOC475405	475405	transcript	XM_005629160.3	protein_coding	2	c.258+450A>T
15	18757060	G	C	PASS	C	intron_variant	MODIFIER	LOC475406	475406	transcript	475406	pseudogene	2	n.1496-1758C>G
15	18757070	G	C	PASS	C	intron_variant	MODIFIER	LOC475406	475406	transcript	475406	pseudogene	2	n.1496-1768C>G
15	20214234	G	T	PASS	T	intron_variant	MODIFIER	NAV3	482577	transcript	XM_022428121.1	protein_coding	6	c.-461-74471G>T
15	20214234	G	T	PASS	T	intron_variant	MODIFIER	NAV3	482577	transcript	XM_022428122.1	protein_coding	5	c.-461-74471G>T
15	20214234	G	T	PASS	T	intron_variant	MODIFIER	NAV3	482577	transcript	XM_014119349.2	protein_coding	1	c.-461-74471G>T
15	20214234	G	T	PASS	T	intron_variant	MODIFIER	NAV3	482577	transcript	XM_022428123.1	protein_coding	2	c.-462+74003G>T
15	20214234	G	T	PASS	T	intron_variant	MODIFIER	NAV3	482577	transcript	XM_014119350.2	protein_coding	2	c.-461-74471G>T
15	20437864	T	A	PASS	A	intron_variant	MODIFIER	NAV3	482577	transcript	XM_022428121.1	protein_coding	8	c.72+83969T>A
15	20437864	T	A	PASS	A	intron_variant	MODIFIER	NAV3	482577	transcript	XM_022428122.1	protein_coding	7	c.72+83969T>A
15	20437864	T	A	PASS	A	intron_variant	MODIFIER	NAV3	482577	transcript	XM_014119349.2	protein_coding	3	c.72+83969T>A
15	20437864	T	A	PASS	A	intron_variant	MODIFIER	NAV3	482577	transcript	XM_022428123.1	protein_coding	4	c.72+83969T>A
15	20437864	T	A	PASS	A	intron_variant	MODIFIER	NAV3	482577	transcript	XM_014119350.2	protein_coding	4	c.72+83969T>A
15	21919547	C	A	PASS	A	intron_variant	MODIFIER	SYT1	482579	transcript	XM_022428125.1	protein_coding	7	c.810+17556C>A
15	21919547	C	A	PASS	A	intron_variant	MODIFIER	LOC102155931	102155931	transcript	XR_002633528.1	pseudogene	3	n.1461+14833G>T
15	21919547	C	A	PASS	A	intron_variant	MODIFIER	LOC102155931	102155931	transcript	XR_002633531.1	pseudogene	3	n.1461+14833G>T
15	21919547	C	A	PASS	A	intron_variant	MODIFIER	LOC102155931	102155931	transcript	XR_002633527.1	pseudogene	3	n.1461+14833G>T
15	21919547	C	A	PASS	A	intron_variant	MODIFIER	LOC102155931	102155931	transcript	XR_002633529.1	pseudogene	3	n.1461+14833G>T
15	21919547	C	A	PASS	A	intron_variant	MODIFIER	LOC102155931	102155931	transcript	XR_002633530.1	pseudogene	3	n.436+14833G>T
15	21919547	C	A	PASS	A	intron_variant	MODIFIER	LOC102155931	102155931	transcript	XR_002633533.1	pseudogene	3	n.283+14833G>T
15	21919547	C	A	PASS	A	intron_variant	MODIFIER	LOC102155931	102155931	transcript	XR_002633532.1	pseudogene	3	n.1461+14833G>T
15	23141248	GCTT	G	PASS	G	intron_variant	MODIFIER	LIN7A	475412	transcript	XM_022428132.1	protein_coding	2	c.61-943_61-941delAAG
15	24337496	TTTAA	T	PASS	T	intergenic_region	MODIFIER	LOC106559753-CCDC59	106559753-611585	intergenic_region	106559753-611585		-1	n.24337497_24337500delTTAA
15	24666972	G	GGGGA	PASS	GGGGA	intron_variant	MODIFIER	TMTC2	482584	transcript	XM_539701.6	protein_coding	1	c.83+37085_83+37086insGGGA
15	24666972	G	GGGGA	PASS	GGGGA	intron_variant	MODIFIER	TMTC2	482584	transcript	XM_022428137.1	protein_coding	1	c.83+37085_83+37086insGGGA
15	24666972	G	GGGGA	PASS	GGGGA	intron_variant	MODIFIER	TMTC2	482584	transcript	XM_022428136.1	protein_coding	1	c.-269+36548_-269+36549insGGGA
15	25207081	A	AG	PASS	AG	intergenic_region	MODIFIER	LOC111098889-LOC111098890	111098889-111098890	intergenic_region	111098889-111098890		-1	n.25207081_25207082insG
15	30747916	GTC	G	PASS	G	intergenic_region	MODIFIER	LOC102154128-LOC102154182	102154128-102154182	intergenic_region	102154128-102154182		-1	n.30747917_30747918delTC
15	30747920	C	G	PASS	G	intergenic_region	MODIFIER	LOC102154128-LOC102154182	102154128-102154182	intergenic_region	102154128-102154182		-1	n.30747920C>G
15	32206145	C	T	PASS	T	intergenic_region	MODIFIER	LOC100684531-LOC111098897	100684531-111098897	intergenic_region	100684531-111098897		-1	n.32206145C>T
15	33588320	C	T	PASS	T	intron_variant	MODIFIER	LOC111090036	111090036	transcript	XR_002614118.1	pseudogene	2	n.551+37351G>A
15	33588320	C	T	PASS	T	intron_variant	MODIFIER	LOC111090036	111090036	transcript	XR_002614119.1	pseudogene	2	n.285+37351G>A
15	33588320	C	T	PASS	T	intron_variant	MODIFIER	LOC111090036	111090036	transcript	XR_002614122.1	pseudogene	1	n.187+38728G>A
15	33588320	C	T	PASS	T	intron_variant	MODIFIER	LOC111090036	111090036	transcript	XM_022403294.1	protein_coding	3	c.86+17771G>A
15	33588320	C	T	PASS	T	intron_variant	MODIFIER	LOC111090036	111090036	transcript	XM_022403290.1	protein_coding	4	c.86+17771G>A
15	33588320	C	T	PASS	T	intron_variant	MODIFIER	LOC111090036	111090036	transcript	XM_022403291.1	protein_coding	4	c.86+17771G>A
15	33588320	C	T	PASS	T	intron_variant	MODIFIER	LOC111090036	111090036	transcript	XM_022403292.1	protein_coding	4	c.86+17771G>A
15	33588320	C	T	PASS	T	intron_variant	MODIFIER	LOC111090036	111090036	transcript	XM_022403293.1	protein_coding	3	c.86+17771G>A
15	33588320	C	T	PASS	T	intron_variant	MODIFIER	LOC111090036	111090036	transcript	XR_002614116.1	pseudogene	4	n.1564+17771G>A
15	33588320	C	T	PASS	T	intron_variant	MODIFIER	LOC111090036	111090036	transcript	XR_002614117.1	pseudogene	4	n.1564+17771G>A
15	33588320	C	T	PASS	T	intron_variant	MODIFIER	LOC111090036	111090036	transcript	XR_002614124.1	pseudogene	4	n.1564+17771G>A
15	33932138	A	C	PASS	C	upstream_gene_variant	MODIFIER	LOC111090037	111090037	transcript	XR_002614131.1	pseudogene	-1	n.-3796A>C
15	33932138	A	C	PASS	C	intron_variant	MODIFIER	CRADD	482604	transcript	XM_022403316.1	protein_coding	2	c.343+52832A>C
15	33932138	A	C	PASS	C	intron_variant	MODIFIER	CRADD	482604	transcript	XM_022403317.1	protein_coding	3	c.316+52832A>C
15	33932138	A	C	PASS	C	intron_variant	MODIFIER	CRADD	482604	transcript	XM_022403318.1	protein_coding	4	c.316+52832A>C
15	33932138	A	C	PASS	C	intron_variant	MODIFIER	CRADD	482604	transcript	XM_022403319.1	protein_coding	4	c.316+52832A>C
15	33932138	A	C	PASS	C	intron_variant	MODIFIER	CRADD	482604	transcript	XM_539721.6	protein_coding	3	c.307+52832A>C
15	33932138	A	C	PASS	C	intron_variant	MODIFIER	CRADD	482604	transcript	XM_005629226.3	protein_coding	3	c.298+52832A>C
15	33932138	A	C	PASS	C	intron_variant	MODIFIER	CRADD	482604	transcript	XM_014119582.2	protein_coding	2	c.298+52832A>C
15	34186412	G	GT	PASS	GT	intron_variant	MODIFIER	LOC100687178	100687178	transcript	XR_002614135.1	pseudogene	15	n.4673-96_4673-95insT
15	34186412	G	GT	PASS	GT	intron_variant	MODIFIER	LOC100687178	100687178	transcript	XR_002614134.1	pseudogene	11	n.3895-96_3895-95insT
15	34214484	G	A	PASS	A	upstream_gene_variant	MODIFIER	LOC111090040	111090040	transcript	XR_002614139.1	pseudogene	-1	n.-942G>A
15	34214484	G	A	PASS	A	intergenic_region	MODIFIER	LOC111090039-LOC111090040	111090039-111090040	intergenic_region	111090039-111090040		-1	n.34214484G>A
15	34335564	C	T	PASS	T	intron_variant	MODIFIER	PLXNC1	100685138	transcript	XM_003431985.3	protein_coding	5	c.1590+194C>T
15	34335564	C	T	PASS	T	intron_variant	MODIFIER	PLXNC1	100685138	transcript	XM_005629229.3	protein_coding	5	c.1590+194C>T
15	34610558	T	C	PASS	C	intergenic_region	MODIFIER	LOC102156774-TMCC3	102156774-482607	intergenic_region	102156774-482607		-1	n.34610558T>C
15	34994881	A	C	PASS	C	intron_variant	MODIFIER	NDUFA12	475428	transcript	XM_532652.6	protein_coding	2	c.169+253T>G
15	35679158	A	C	PASS	C	intron_variant	MODIFIER	LOC111090045	111090045	transcript	XR_002614163.1	pseudogene	2	n.156-255T>G
15	35748315	A	G	PASS	G	upstream_gene_variant	MODIFIER	CCDC38	111098873	transcript	XM_022427685.1	protein_coding	-1	c.-10824T>C
15	35748315	A	G	PASS	G	intron_variant	MODIFIER	AMDHD1	475432	transcript	XM_022427686.1	protein_coding	3	c.563-451A>G
15	35754979	G	A	PASS	A	intron_variant	MODIFIER	AMDHD1	475432	transcript	XM_022427686.1	protein_coding	6	c.1132-581G>A
15	35963156	T	A	PASS	A	intron_variant	MODIFIER	ELK3	482613	transcript	XM_539730.6	protein_coding	1	c.-3+12271T>A
15	36389453	C	CT	PASS	CT	intron_variant	MODIFIER	CFAP54	102153340	transcript	XM_022403345.1	protein_coding	47	c.6688-1742_6688-1741insT
15	36389453	C	CT	PASS	CT	intron_variant	MODIFIER	CFAP54	102153340	transcript	XR_002614175.1	pseudogene	47	n.6912-1742_6912-1741insT
15	36389453	C	CT	PASS	CT	intron_variant	MODIFIER	CFAP54	102153340	transcript	XM_022403355.1	protein_coding	47	c.6688-1742_6688-1741insT
15	36389453	C	CT	PASS	CT	intron_variant	MODIFIER	CFAP54	102153340	transcript	XR_002614174.1	pseudogene	47	n.6892-1742_6892-1741insT
15	36389453	C	CT	PASS	CT	intron_variant	MODIFIER	CFAP54	102153340	transcript	XM_022403346.1	protein_coding	47	c.6685-1742_6685-1741insT
15	36389453	C	CT	PASS	CT	intron_variant	MODIFIER	CFAP54	102153340	transcript	XM_022403347.1	protein_coding	47	c.6685-1742_6685-1741insT
15	36389453	C	CT	PASS	CT	intron_variant	MODIFIER	CFAP54	102153340	transcript	XM_022403348.1	protein_coding	47	c.6682-1742_6682-1741insT
15	36389453	C	CT	PASS	CT	intron_variant	MODIFIER	CFAP54	102153340	transcript	XM_022403352.1	protein_coding	46	c.6574-1742_6574-1741insT
15	36389453	C	CT	PASS	CT	intron_variant	MODIFIER	CFAP54	102153340	transcript	XM_022403353.1	protein_coding	45	c.6472-1742_6472-1741insT
15	36389453	C	CT	PASS	CT	intron_variant	MODIFIER	CFAP54	102153340	transcript	XR_002614173.1	pseudogene	47	n.6886-1742_6886-1741insT
15	36389453	C	CT	PASS	CT	intron_variant	MODIFIER	CFAP54	102153340	transcript	XR_002614172.1	pseudogene	47	n.6886-1742_6886-1741insT
15	36389453	C	CT	PASS	CT	intron_variant	MODIFIER	CFAP54	102153340	transcript	XM_022403351.1	protein_coding	47	c.6688-1742_6688-1741insT
15	36389453	C	CT	PASS	CT	intron_variant	MODIFIER	CFAP54	102153340	transcript	XM_022403350.1	protein_coding	47	c.6688-1742_6688-1741insT
15	36389453	C	CT	PASS	CT	intron_variant	MODIFIER	CFAP54	102153340	transcript	XM_022403349.1	protein_coding	47	c.6688-1742_6688-1741insT
15	36389453	C	CT	PASS	CT	intron_variant	MODIFIER	CFAP54	102153340	transcript	XM_022403356.1	protein_coding	47	c.6685-1742_6685-1741insT
15	36389453	C	CT	PASS	CT	intron_variant	MODIFIER	CFAP54	102153340	transcript	XM_022403354.1	protein_coding	46	c.5986-1742_5986-1741insT
15	37679899	G	A	PASS	A	intergenic_region	MODIFIER	LOC111098905-LOC111098906	111098905-111098906	intergenic_region	111098905-111098906		-1	n.37679899G>A
15	38045094	GTCTTTT	G	PASS	G	upstream_gene_variant	MODIFIER	APAF1	482620	transcript	XM_022403390.1	protein_coding	-1	c.-1864_-1859delTCTTTT
15	38045094	GTCTTTT	G	PASS	G	intron_variant	MODIFIER	APAF1	482620	transcript	XM_022403382.1	protein_coding	5	c.530-1461_530-1456delTCTTTT
15	38045094	GTCTTTT	G	PASS	G	intron_variant	MODIFIER	APAF1	482620	transcript	XM_014119302.2	protein_coding	5	c.530-1461_530-1456delTCTTTT
15	38045094	GTCTTTT	G	PASS	G	intron_variant	MODIFIER	APAF1	482620	transcript	XR_002614226.1	pseudogene	5	n.666-1461_666-1456delTCTTTT
15	38045094	GTCTTTT	G	PASS	G	intron_variant	MODIFIER	APAF1	482620	transcript	XM_014119299.2	protein_coding	5	c.530-1461_530-1456delTCTTTT
15	38045094	GTCTTTT	G	PASS	G	intron_variant	MODIFIER	APAF1	482620	transcript	XM_003432034.4	protein_coding	5	c.530-1461_530-1456delTCTTTT
15	38045094	GTCTTTT	G	PASS	G	intron_variant	MODIFIER	APAF1	482620	transcript	XM_022403384.1	protein_coding	5	c.530-1461_530-1456delTCTTTT
15	38045094	GTCTTTT	G	PASS	G	intron_variant	MODIFIER	APAF1	482620	transcript	XM_022403385.1	protein_coding	5	c.530-1461_530-1456delTCTTTT
15	38045094	GTCTTTT	G	PASS	G	intron_variant	MODIFIER	APAF1	482620	transcript	XM_022403386.1	protein_coding	5	c.530-1461_530-1456delTCTTTT
15	38045094	GTCTTTT	G	PASS	G	intron_variant	MODIFIER	APAF1	482620	transcript	XM_022403387.1	protein_coding	5	c.530-1461_530-1456delTCTTTT
15	38045094	GTCTTTT	G	PASS	G	intron_variant	MODIFIER	APAF1	482620	transcript	XM_022403388.1	protein_coding	5	c.530-1461_530-1456delTCTTTT
15	38045094	GTCTTTT	G	PASS	G	intron_variant	MODIFIER	APAF1	482620	transcript	XR_002614223.1	pseudogene	5	n.666-1461_666-1456delTCTTTT
15	38045094	GTCTTTT	G	PASS	G	intron_variant	MODIFIER	APAF1	482620	transcript	XR_002614224.1	pseudogene	5	n.666-1461_666-1456delTCTTTT
15	38045094	GTCTTTT	G	PASS	G	intron_variant	MODIFIER	APAF1	482620	transcript	XR_002614225.1	pseudogene	5	n.666-1461_666-1456delTCTTTT
15	38045094	GTCTTTT	G	PASS	G	intron_variant	MODIFIER	APAF1	482620	transcript	XR_002614222.1	pseudogene	5	n.666-1461_666-1456delTCTTTT
15	38045094	GTCTTTT	G	PASS	G	intron_variant	MODIFIER	APAF1	482620	transcript	XM_022403383.1	protein_coding	4	c.530-1461_530-1456delTCTTTT
15	38045094	GTCTTTT	G	PASS	G	intron_variant	MODIFIER	APAF1	482620	transcript	XM_022403389.1	protein_coding	1	c.-62-1461_-62-1456delTCTTTT
15	38117164	T	TAAAAAAAAAAAAA	PASS	TAAAAAAAAAAAAA	3_prime_UTR_variant	MODIFIER	APAF1	482620	transcript	XM_003432034.4	protein_coding	28	c.*2178_*2179insAAAAAAAAAAAAA
15	38117164	T	TAAAAAAAAAAAAA	PASS	TAAAAAAAAAAAAA	intron_variant	MODIFIER	APAF1	482620	transcript	XM_022403382.1	protein_coding	27	c.3606+6406_3606+6407insAAAAAAAAAAAAA
15	38117164	T	TAAAAAAAAAAAAA	PASS	TAAAAAAAAAAAAA	intron_variant	MODIFIER	APAF1	482620	transcript	XM_022403384.1	protein_coding	27	c.3555+6406_3555+6407insAAAAAAAAAAAAA
15	38117164	T	TAAAAAAAAAAAAA	PASS	TAAAAAAAAAAAAA	intron_variant	MODIFIER	APAF1	482620	transcript	XM_022403385.1	protein_coding	26	c.3480+6406_3480+6407insAAAAAAAAAAAAA
15	38117164	T	TAAAAAAAAAAAAA	PASS	TAAAAAAAAAAAAA	intron_variant	MODIFIER	APAF1	482620	transcript	XM_022403386.1	protein_coding	26	c.3444+6406_3444+6407insAAAAAAAAAAAAA
15	38117164	T	TAAAAAAAAAAAAA	PASS	TAAAAAAAAAAAAA	intron_variant	MODIFIER	APAF1	482620	transcript	XM_022403387.1	protein_coding	26	c.3438+6406_3438+6407insAAAAAAAAAAAAA
15	38117164	T	TAAAAAAAAAAAAA	PASS	TAAAAAAAAAAAAA	intron_variant	MODIFIER	APAF1	482620	transcript	XM_022403388.1	protein_coding	25	c.3315+6406_3315+6407insAAAAAAAAAAAAA
15	38117164	T	TAAAAAAAAAAAAA	PASS	TAAAAAAAAAAAAA	intron_variant	MODIFIER	APAF1	482620	transcript	XR_002614223.1	pseudogene	27	n.3742+6406_3742+6407insAAAAAAAAAAAAA
15	38117164	T	TAAAAAAAAAAAAA	PASS	TAAAAAAAAAAAAA	intron_variant	MODIFIER	APAF1	482620	transcript	XR_002614224.1	pseudogene	27	n.3742+6406_3742+6407insAAAAAAAAAAAAA
15	38117164	T	TAAAAAAAAAAAAA	PASS	TAAAAAAAAAAAAA	intron_variant	MODIFIER	APAF1	482620	transcript	XR_002614225.1	pseudogene	27	n.3742+6406_3742+6407insAAAAAAAAAAAAA
15	38117164	T	TAAAAAAAAAAAAA	PASS	TAAAAAAAAAAAAA	intron_variant	MODIFIER	APAF1	482620	transcript	XR_002614222.1	pseudogene	27	n.3742+6406_3742+6407insAAAAAAAAAAAAA
15	38117164	T	TAAAAAAAAAAAAA	PASS	TAAAAAAAAAAAAA	intron_variant	MODIFIER	APAF1	482620	transcript	XM_022403383.1	protein_coding	26	c.3606+6406_3606+6407insAAAAAAAAAAAAA
15	38117164	T	TAAAAAAAAAAAAA	PASS	TAAAAAAAAAAAAA	intron_variant	MODIFIER	APAF1	482620	transcript	XM_022403389.1	protein_coding	23	c.3015+6406_3015+6407insAAAAAAAAAAAAA
15	38117164	T	TAAAAAAAAAAAAA	PASS	TAAAAAAAAAAAAA	intron_variant	MODIFIER	APAF1	482620	transcript	XM_022403390.1	protein_coding	22	c.2916+6406_2916+6407insAAAAAAAAAAAAA
15	38502556	G	A	PASS	A	upstream_gene_variant	MODIFIER	ANKS1B	482621	transcript	XM_022403377.1	protein_coding	-1	c.-2832C>T
15	38502556	G	A	PASS	A	upstream_gene_variant	MODIFIER	ANKS1B	482621	transcript	XM_022403376.1	protein_coding	-1	c.-2661C>T
15	38502556	G	A	PASS	A	upstream_gene_variant	MODIFIER	ANKS1B	482621	transcript	XM_539738.6	protein_coding	-1	c.-2661C>T
15	38502556	G	A	PASS	A	upstream_gene_variant	MODIFIER	ANKS1B	482621	transcript	XM_022403378.1	protein_coding	-1	c.-2832C>T
15	38502556	G	A	PASS	A	intron_variant	MODIFIER	ANKS1B	482621	transcript	XM_022403363.1	protein_coding	14	c.2420-2758C>T
15	38502556	G	A	PASS	A	intron_variant	MODIFIER	ANKS1B	482621	transcript	XM_022403375.1	protein_coding	13	c.1886-2758C>T
15	38502556	G	A	PASS	A	intron_variant	MODIFIER	ANKS1B	482621	transcript	XM_005629264.2	protein_coding	14	c.2420-2758C>T
15	38502556	G	A	PASS	A	intron_variant	MODIFIER	ANKS1B	482621	transcript	XM_014119281.2	protein_coding	14	c.2420-2758C>T
15	38502556	G	A	PASS	A	intron_variant	MODIFIER	ANKS1B	482621	transcript	XM_014119282.2	protein_coding	14	c.2420-2758C>T
15	38502556	G	A	PASS	A	intron_variant	MODIFIER	ANKS1B	482621	transcript	XM_022403364.1	protein_coding	14	c.2420-2758C>T
15	38502556	G	A	PASS	A	intron_variant	MODIFIER	ANKS1B	482621	transcript	XM_022403365.1	protein_coding	14	c.2420-2758C>T
15	38502556	G	A	PASS	A	intron_variant	MODIFIER	ANKS1B	482621	transcript	XM_022403366.1	protein_coding	14	c.2420-2758C>T
15	38502556	G	A	PASS	A	intron_variant	MODIFIER	ANKS1B	482621	transcript	XM_022403368.1	protein_coding	14	c.2420-2758C>T
15	38502556	G	A	PASS	A	intron_variant	MODIFIER	ANKS1B	482621	transcript	XM_022403369.1	protein_coding	14	c.2420-2758C>T
15	38502556	G	A	PASS	A	intron_variant	MODIFIER	ANKS1B	482621	transcript	XM_022403371.1	protein_coding	14	c.2420-2758C>T
15	38502556	G	A	PASS	A	intron_variant	MODIFIER	ANKS1B	482621	transcript	XM_022403372.1	protein_coding	14	c.2420-2758C>T
15	38502556	G	A	PASS	A	intron_variant	MODIFIER	ANKS1B	482621	transcript	XM_022403373.1	protein_coding	14	c.2420-2758C>T
15	38502556	G	A	PASS	A	intron_variant	MODIFIER	ANKS1B	482621	transcript	XM_022403367.1	protein_coding	14	c.2420-2758C>T
15	38502556	G	A	PASS	A	intron_variant	MODIFIER	ANKS1B	482621	transcript	XM_022403374.1	protein_coding	14	c.2420-2758C>T
15	39190784	G	A	PASS	A	upstream_gene_variant	MODIFIER	ANKS1B	482621	transcript	XM_022403363.1	protein_coding	-1	c.-4473C>T
15	39190784	G	A	PASS	A	upstream_gene_variant	MODIFIER	ANKS1B	482621	transcript	XM_005629264.2	protein_coding	-1	c.-4473C>T
15	39190784	G	A	PASS	A	upstream_gene_variant	MODIFIER	ANKS1B	482621	transcript	XM_014119281.2	protein_coding	-1	c.-4473C>T
15	39190784	G	A	PASS	A	upstream_gene_variant	MODIFIER	ANKS1B	482621	transcript	XM_014119282.2	protein_coding	-1	c.-4473C>T
15	39190784	G	A	PASS	A	upstream_gene_variant	MODIFIER	ANKS1B	482621	transcript	XM_022403364.1	protein_coding	-1	c.-4473C>T
15	39190784	G	A	PASS	A	upstream_gene_variant	MODIFIER	ANKS1B	482621	transcript	XM_022403365.1	protein_coding	-1	c.-4473C>T
15	39190784	G	A	PASS	A	upstream_gene_variant	MODIFIER	ANKS1B	482621	transcript	XM_022403366.1	protein_coding	-1	c.-4473C>T
15	39190784	G	A	PASS	A	upstream_gene_variant	MODIFIER	ANKS1B	482621	transcript	XM_022403368.1	protein_coding	-1	c.-4473C>T
15	39190784	G	A	PASS	A	upstream_gene_variant	MODIFIER	ANKS1B	482621	transcript	XM_022403369.1	protein_coding	-1	c.-4473C>T
15	39190784	G	A	PASS	A	upstream_gene_variant	MODIFIER	ANKS1B	482621	transcript	XM_022403371.1	protein_coding	-1	c.-4473C>T
15	39190784	G	A	PASS	A	upstream_gene_variant	MODIFIER	ANKS1B	482621	transcript	XM_022403372.1	protein_coding	-1	c.-4473C>T
15	39190784	G	A	PASS	A	upstream_gene_variant	MODIFIER	ANKS1B	482621	transcript	XM_022403373.1	protein_coding	-1	c.-4473C>T
15	39190784	G	A	PASS	A	upstream_gene_variant	MODIFIER	ANKS1B	482621	transcript	XM_022403367.1	protein_coding	-1	c.-4473C>T
15	39190784	G	A	PASS	A	upstream_gene_variant	MODIFIER	ANKS1B	482621	transcript	XM_022403374.1	protein_coding	-1	c.-4473C>T
15	39190784	G	A	PASS	A	intergenic_region	MODIFIER	ANKS1B-UHRF1BP1L	482621-475438	intergenic_region	482621-475438		-1	n.39190784G>A
15	39387273	G	A	PASS	A	intron_variant	MODIFIER	SCYL2	482622	transcript	XM_005629271.3	protein_coding	3	c.178-2450G>A
15	39387273	G	A	PASS	A	intron_variant	MODIFIER	SCYL2	482622	transcript	XM_014119583.2	protein_coding	2	c.178-2450G>A
15	39387273	G	A	PASS	A	intron_variant	MODIFIER	SCYL2	482622	transcript	XM_005629273.3	protein_coding	2	c.178-2450G>A
15	39387273	G	A	PASS	A	intron_variant	MODIFIER	SCYL2	482622	transcript	XM_022403396.1	protein_coding	1	c.-342-2450G>A
15	39387273	G	A	PASS	A	intron_variant	MODIFIER	SCYL2	482622	transcript	XM_022403395.1	protein_coding	2	c.178-2450G>A
15	39698129	T	C	PASS	C	intergenic_region	MODIFIER	GAS2L3-ANO4	482624-612164	intergenic_region	482624-612164		-1	n.39698129T>C
15	39808802	G	T	PASS	T	intron_variant	MODIFIER	ANO4	612164	transcript	XM_014119626.2	protein_coding	1	c.205+1688G>T
15	39808802	G	T	PASS	T	intron_variant	MODIFIER	ANO4	612164	transcript	XM_005629278.3	protein_coding	2	c.-138+60549G>T
15	39808802	G	T	PASS	T	intron_variant	MODIFIER	ANO4	612164	transcript	XM_003432040.4	protein_coding	1	c.-138+2143G>T
15	39808802	G	T	PASS	T	intron_variant	MODIFIER	ANO4	612164	transcript	XM_014119627.2	protein_coding	1	c.205+1688G>T
15	39808802	G	T	PASS	T	intron_variant	MODIFIER	ANO4	612164	transcript	XM_005629279.3	protein_coding	1	c.-138+1199G>T
15	40401511	G	A	PASS	A	upstream_gene_variant	MODIFIER	ARL1	612931	transcript	XM_847897.5	protein_coding	-1	c.-680C>T
15	40401511	G	A	PASS	A	intergenic_region	MODIFIER	ARL1-SPIC	612931-612169	intergenic_region	612931-612169		-1	n.40401511G>A
15	40778351	G	A	PASS	A	intron_variant	MODIFIER	DRAM1	612179	transcript	XM_022403421.1	protein_coding	4	c.441+62G>A
15	40778351	G	A	PASS	A	intron_variant	MODIFIER	DRAM1	612179	transcript	XM_022403428.1	protein_coding	4	c.441+62G>A
15	40778351	G	A	PASS	A	intron_variant	MODIFIER	DRAM1	612179	transcript	XM_022403423.1	protein_coding	4	c.441+62G>A
15	40778351	G	A	PASS	A	intron_variant	MODIFIER	DRAM1	612179	transcript	XM_022403426.1	protein_coding	4	c.441+62G>A
15	40778351	G	A	PASS	A	intron_variant	MODIFIER	DRAM1	612179	transcript	XR_002614237.1	pseudogene	4	n.523+62G>A
15	40778351	G	A	PASS	A	intron_variant	MODIFIER	DRAM1	612179	transcript	XM_022403422.1	protein_coding	4	c.441+62G>A
15	40778351	G	A	PASS	A	intron_variant	MODIFIER	DRAM1	612179	transcript	XM_022403424.1	protein_coding	4	c.441+62G>A
15	40778351	G	A	PASS	A	intron_variant	MODIFIER	DRAM1	612179	transcript	XM_022403425.1	protein_coding	3	c.342+62G>A
15	40778351	G	A	PASS	A	intron_variant	MODIFIER	DRAM1	612179	transcript	XM_022403427.1	protein_coding	3	c.342+62G>A
15	40778351	G	A	PASS	A	intron_variant	MODIFIER	DRAM1	612179	transcript	XR_002614236.1	pseudogene	4	n.523+62G>A
15	40864599	C	A	PASS	A	intergenic_region	MODIFIER	DRAM1-WASHC3	612179-475444	intergenic_region	612179-475444		-1	n.40864599C>A
15	40912983	G	A	PASS	A	upstream_gene_variant	MODIFIER	LOC102151875	102151875	transcript	XR_294240.3	pseudogene	-1	n.-3570G>A
15	40912983	G	A	PASS	A	intron_variant	MODIFIER	WASHC3	475444	transcript	XM_532668.6	protein_coding	2	c.150+2668C>T
15	40912983	G	A	PASS	A	intron_variant	MODIFIER	WASHC3	475444	transcript	XM_005629294.3	protein_coding	2	c.150+2668C>T
15	40912983	G	A	PASS	A	intron_variant	MODIFIER	WASHC3	475444	transcript	XM_005629295.3	protein_coding	2	c.150+2668C>T
15	40912983	G	A	PASS	A	intron_variant	MODIFIER	WASHC3	475444	transcript	XM_022403429.1	protein_coding	2	c.150+2668C>T
15	40967110	C	T	PASS	T	upstream_gene_variant	MODIFIER	PARPBP	612196	transcript	XM_849932.4	protein_coding	-1	c.-9493C>T
15	40967110	C	T	PASS	T	intron_variant	MODIFIER	NUP37	475445	transcript	XM_005629296.3	protein_coding	3	c.156+3396G>A
15	40967110	C	T	PASS	T	intron_variant	MODIFIER	NUP37	475445	transcript	XM_532669.5	protein_coding	2	c.156+3396G>A
15	41158332	A	G	PASS	G	intron_variant	MODIFIER	LOC111090065	111090065	transcript	XR_002614241.1	pseudogene	3	n.972+5544A>G
15	41158332	A	G	PASS	G	intron_variant	MODIFIER	LOC111090065	111090065	transcript	XR_002614240.1	pseudogene	3	n.555+5544A>G
15	41158332	A	G	PASS	G	intron_variant	MODIFIER	LOC111090065	111090065	transcript	XR_002614245.1	pseudogene	3	n.552+5544A>G
15	41158332	A	G	PASS	G	intron_variant	MODIFIER	LOC111090065	111090065	transcript	XR_002614238.1	pseudogene	2	n.477+5544A>G
15	41158332	A	G	PASS	G	intron_variant	MODIFIER	LOC111090065	111090065	transcript	XR_002614239.1	pseudogene	2	n.469+5544A>G
15	41158332	A	G	PASS	G	intron_variant	MODIFIER	LOC111090065	111090065	transcript	XR_002614244.1	pseudogene	2	n.467+5544A>G
15	41158332	A	G	PASS	G	intron_variant	MODIFIER	LOC111090065	111090065	transcript	XR_002614243.1	pseudogene	2	n.182+5544A>G
15	41158332	A	G	PASS	G	intron_variant	MODIFIER	LOC111090065	111090065	transcript	XR_002614242.1	pseudogene	2	n.898+5544A>G
15	41165668	A	AATATGGAAATGGAAT	PASS	AATATGGAAATGGAAT	intron_variant	MODIFIER	LOC111090065	111090065	transcript	XR_002614241.1	pseudogene	3	n.972+12880_972+12881insATATGGAAATGGAAT
15	41165668	A	AATATGGAAATGGAAT	PASS	AATATGGAAATGGAAT	intron_variant	MODIFIER	LOC111090065	111090065	transcript	XR_002614240.1	pseudogene	3	n.555+12880_555+12881insATATGGAAATGGAAT
15	41165668	A	AATATGGAAATGGAAT	PASS	AATATGGAAATGGAAT	intron_variant	MODIFIER	LOC111090065	111090065	transcript	XR_002614245.1	pseudogene	3	n.552+12880_552+12881insATATGGAAATGGAAT
15	41165668	A	AATATGGAAATGGAAT	PASS	AATATGGAAATGGAAT	intron_variant	MODIFIER	LOC111090065	111090065	transcript	XR_002614238.1	pseudogene	2	n.477+12880_477+12881insATATGGAAATGGAAT
15	41165668	A	AATATGGAAATGGAAT	PASS	AATATGGAAATGGAAT	intron_variant	MODIFIER	LOC111090065	111090065	transcript	XR_002614239.1	pseudogene	2	n.469+12880_469+12881insATATGGAAATGGAAT
15	41165668	A	AATATGGAAATGGAAT	PASS	AATATGGAAATGGAAT	intron_variant	MODIFIER	LOC111090065	111090065	transcript	XR_002614244.1	pseudogene	2	n.467+12880_467+12881insATATGGAAATGGAAT
15	41165668	A	AATATGGAAATGGAAT	PASS	AATATGGAAATGGAAT	intron_variant	MODIFIER	LOC111090065	111090065	transcript	XR_002614243.1	pseudogene	2	n.182+12880_182+12881insATATGGAAATGGAAT
15	41165668	A	AATATGGAAATGGAAT	PASS	AATATGGAAATGGAAT	intron_variant	MODIFIER	LOC111090065	111090065	transcript	XR_002614242.1	pseudogene	2	n.898+12880_898+12881insATATGGAAATGGAAT
15	41317874	G	A	PASS	A	intergenic_region	MODIFIER	IGF1-PAH	610255-475446	intergenic_region	610255-475446		-1	n.41317874G>A
15	41396112	G	T	PASS	T	intergenic_region	MODIFIER	IGF1-PAH	610255-475446	intergenic_region	610255-475446		-1	n.41396112G>T
15	41440573	C	A	PASS	A	intergenic_region	MODIFIER	IGF1-PAH	610255-475446	intergenic_region	610255-475446		-1	n.41440573C>A
15	42326803	T	C	PASS	C	3_prime_UTR_variant	MODIFIER	STAB2	100687903	transcript	XM_022403434.1	protein_coding	68	c.*158T>C
15	42326803	T	C	PASS	C	intron_variant	MODIFIER	STAB2	100687903	transcript	XM_022403432.1	protein_coding	67	c.7476+1324T>C
15	42326803	T	C	PASS	C	intron_variant	MODIFIER	STAB2	100687903	transcript	XM_022403433.1	protein_coding	67	c.7473+1324T>C
15	42326803	T	C	PASS	C	intron_variant	MODIFIER	STAB2	100687903	transcript	XM_022403435.1	protein_coding	59	c.6456+1324T>C
15	42351641	C	T	PASS	T	intron_variant	MODIFIER	NT5DC3	612224	transcript	XM_014119382.2	protein_coding	10	c.1117-347G>A
15	42351641	C	T	PASS	T	intron_variant	MODIFIER	NT5DC3	612224	transcript	XM_005629298.3	protein_coding	5	c.598-347G>A
15	42351641	C	T	PASS	T	intron_variant	MODIFIER	NT5DC3	612224	transcript	XM_022403437.1	protein_coding	6	c.463-347G>A
15	42351641	C	T	PASS	T	intron_variant	MODIFIER	NT5DC3	612224	transcript	XM_022403436.1	protein_coding	7	c.667-347G>A
15	45128619	C	T	PASS	T	intron_variant	MODIFIER	TTC29	482638	transcript	XM_022403477.1	protein_coding	11	c.1331-35002G>A
15	45128619	C	T	PASS	T	intron_variant	MODIFIER	TTC29	482638	transcript	XM_539755.6	protein_coding	11	c.1331-35002G>A
15	48143710	G	A	PASS	A	intron_variant	MODIFIER	DCLK2	482642	transcript	XM_005629320.3	protein_coding	2	c.756+686G>A
15	48143710	G	A	PASS	A	intron_variant	MODIFIER	DCLK2	482642	transcript	XM_005629321.3	protein_coding	2	c.756+686G>A
15	48143710	G	A	PASS	A	intron_variant	MODIFIER	DCLK2	482642	transcript	XM_014119370.2	protein_coding	2	c.756+686G>A
15	48143710	G	A	PASS	A	intron_variant	MODIFIER	DCLK2	482642	transcript	XM_014119372.2	protein_coding	2	c.756+686G>A
15	48143710	G	A	PASS	A	intron_variant	MODIFIER	DCLK2	482642	transcript	XM_014119371.2	protein_coding	2	c.756+686G>A
15	48143710	G	A	PASS	A	intron_variant	MODIFIER	DCLK2	482642	transcript	XM_022403502.1	protein_coding	2	c.756+686G>A
15	48143710	G	A	PASS	A	intron_variant	MODIFIER	DCLK2	482642	transcript	XM_022403501.1	protein_coding	2	c.756+686G>A
15	48143710	G	A	PASS	A	intron_variant	MODIFIER	DCLK2	482642	transcript	XM_005629323.3	protein_coding	2	c.756+686G>A
15	48143710	G	A	PASS	A	intron_variant	MODIFIER	DCLK2	482642	transcript	XM_022403500.1	protein_coding	2	c.756+686G>A
15	48143710	G	A	PASS	A	intron_variant	MODIFIER	DCLK2	482642	transcript	XM_005629322.3	protein_coding	2	c.756+686G>A
15	50590749	A	T	PASS	T	intron_variant	MODIFIER	TIGD4	100855926	transcript	XR_002614335.1	pseudogene	4	n.2577-2134T>A
15	53729546	C	G	PASS	G	intergenic_region	MODIFIER	LOC111090003-LOC111098920	111090003-111098920	intergenic_region	111090003-111098920		-1	n.53729546C>G
15	53830649	T	A	PASS	A	intergenic_region	MODIFIER	LOC111098920-LOC111098921	111098920-111098921	intergenic_region	111098920-111098921		-1	n.53830649T>A
15	53909170	G	A	PASS	A	intergenic_region	MODIFIER	LOC111098920-LOC111098921	111098920-111098921	intergenic_region	111098920-111098921		-1	n.53909170G>A
15	54124076	AC	A	PASS	A	intergenic_region	MODIFIER	LOC111098921-PDGFC	111098921-482666	intergenic_region	111098921-482666		-1	n.54124077delC
15	54147179	G	A	GATKstd	A	intron_variant	MODIFIER	PDGFC	482666	transcript	XM_022403541.1	protein_coding	6	c.627-1551C>T
15	54159635	C	T	PASS	T	intron_variant	MODIFIER	PDGFC	482666	transcript	XM_022403541.1	protein_coding	3	c.286-2812G>A
15	54383764	T	C	PASS	C	intergenic_region	MODIFIER	LOC111090113-LOC106559756	111090113-106559756	intergenic_region	111090113-106559756		-1	n.54383764T>C
15	54417575	G	C	PASS	C	intron_variant	MODIFIER	LOC106559756	106559756	transcript	XR_002614351.1	pseudogene	1	n.327-2528C>G
15	54417575	G	C	PASS	C	intron_variant	MODIFIER	LOC106559756	106559756	transcript	XR_002614354.1	pseudogene	1	n.327-2528C>G
15	54417575	G	C	PASS	C	intron_variant	MODIFIER	LOC106559756	106559756	transcript	XR_002614353.1	pseudogene	1	n.327-2528C>G
15	54813551	T	A	PASS	A	intergenic_region	MODIFIER	GRIA2-LOC102156412	482667-102156412	intergenic_region	482667-102156412		-1	n.54813551T>A
15	61327606	C	T	PASS	T	intron_variant	MODIFIER	CPE	475492	transcript	XM_005629393.3	protein_coding	1	c.22+5970C>T
16	13122860	C	CGG	PASS	CGG	intron_variant	MODIFIER	CALD1	608135	transcript	XM_022403792.1	protein_coding	5	c.1188+168_1188+169insCC
16	13122860	C	CGG	PASS	CGG	intron_variant	MODIFIER	CALD1	608135	transcript	XM_022403795.1	protein_coding	4	c.1188+168_1188+169insCC
16	13122860	C	CGG	PASS	CGG	intron_variant	MODIFIER	CALD1	608135	transcript	XM_022403793.1	protein_coding	6	c.1188+168_1188+169insCC
16	13122860	C	CGG	PASS	CGG	intron_variant	MODIFIER	CALD1	608135	transcript	XM_022403794.1	protein_coding	6	c.1188+168_1188+169insCC
16	13122860	C	CGG	PASS	CGG	intron_variant	MODIFIER	CALD1	608135	transcript	XM_022403796.1	protein_coding	5	c.1188+168_1188+169insCC
16	13122860	C	CGG	PASS	CGG	intron_variant	MODIFIER	CALD1	608135	transcript	XM_014119846.2	protein_coding	3	c.621+717_621+718insCC
16	13122860	C	CGG	PASS	CGG	intron_variant	MODIFIER	CALD1	608135	transcript	XM_005629603.3	protein_coding	5	c.639+717_639+718insCC
16	14473242	TATATATATATATATATATATATATATATATATATA	T	PASS	T	upstream_gene_variant	MODIFIER	TRNAC-GCA	111090386	transcript	111090386	pseudogene	-1	n.-2499_-2465delTATATATATATATATATATATATATATATATATAT
16	14473242	TATATATATATATATATATATATATATATATATATA	T	PASS	T	downstream_gene_variant	MODIFIER	TRNAC-GCA	111090387	transcript	111090387	pseudogene	-1	n.*1034_*1068delTATATATATATATATATATATATATATATATATAT
16	14473242	TATATATATATATATATATATATATATATATATATA	T	PASS	T	downstream_gene_variant	MODIFIER	TRNAC-GCA	111090389	transcript	111090389	pseudogene	-1	n.*4905_*4939delTATATATATATATATATATATATATATATATATAT
16	14473242	TATATATATATATATATATATATATATATATATATA	T	PASS	T	intergenic_region	MODIFIER	TRNAC-GCA-TRNAC-GCA	111090386-111090387	intergenic_region	111090386-111090387		-1	n.14473243_14473277delATATATATATATATATATATATATATATATATATA
16	17896026	G	GAAAGAAAGAAAGAAAGAAAGAAAGAAAGAAAGAAAGAAAGAAAGAAAGAAAGAAAGAAAAGGAAAGAA	PASS	GAAAGAAAGAAAGAAAGAAAGAAAGAAAGAAAGAAAGAAAGAAAGAAAGAAAGAAAGAAAAGGAAAGAA	intron_variant	MODIFIER	DPP6	475553	transcript	XM_532774.7	protein_coding	7	c.774+13175_774+13176insAAAGAAAGAAAGAAAGAAAGAAAGAAAGAAAGAAAGAAAGAAAGAAAGAAAGAAAGAAAAGGAAAGAA
16	17896026	G	GAAAGAAAGAAAGAAAGAAAGAAAGAAAGAAAGAAAGAAAGAAAGAAAGAAAGAAAGAAAAGGAAAGAA	PASS	GAAAGAAAGAAAGAAAGAAAGAAAGAAAGAAAGAAAGAAAGAAAGAAAGAAAGAAAGAAAAGGAAAGAA	intron_variant	MODIFIER	DPP6	475553	transcript	XM_022403892.1	protein_coding	7	c.774+13175_774+13176insAAAGAAAGAAAGAAAGAAAGAAAGAAAGAAAGAAAGAAAGAAAGAAAGAAAGAAAGAAAAGGAAAGAA
16	17896026	G	GAAAGAAAGAAAGAAAGAAAGAAAGAAAGAAAGAAAGAAAGAAAGAAAGAAAGAAAGAAAAGGAAAGAA	PASS	GAAAGAAAGAAAGAAAGAAAGAAAGAAAGAAAGAAAGAAAGAAAGAAAGAAAGAAAGAAAAGGAAAGAA	intron_variant	MODIFIER	DPP6	475553	transcript	XM_014119865.2	protein_coding	6	c.675+13175_675+13176insAAAGAAAGAAAGAAAGAAAGAAAGAAAGAAAGAAAGAAAGAAAGAAAGAAAGAAAGAAAAGGAAAGAA
16	17896026	G	GAAAGAAAGAAAGAAAGAAAGAAAGAAAGAAAGAAAGAAAGAAAGAAAGAAAGAAAGAAAAGGAAAGAA	PASS	GAAAGAAAGAAAGAAAGAAAGAAAGAAAGAAAGAAAGAAAGAAAGAAAGAAAGAAAGAAAAGGAAAGAA	intron_variant	MODIFIER	DPP6	475553	transcript	XM_005629701.3	protein_coding	7	c.576+13175_576+13176insAAAGAAAGAAAGAAAGAAAGAAAGAAAGAAAGAAAGAAAGAAAGAAAGAAAGAAAGAAAAGGAAAGAA
16	18505667	G	A	PASS	A	intron_variant	MODIFIER	RBM33	611426	transcript	XM_014119847.2	protein_coding	1	c.43+15565G>A
16	18505667	G	A	PASS	A	intron_variant	MODIFIER	RBM33	611426	transcript	XM_014119848.2	protein_coding	1	c.43+15565G>A
16	18505667	G	A	PASS	A	intron_variant	MODIFIER	RBM33	611426	transcript	XM_014119849.2	protein_coding	1	c.43+15565G>A
16	18773904	G	A	PASS	A	intron_variant	MODIFIER	LOC102155425	102155425	transcript	XR_002614423.1	pseudogene	3	n.360-71G>A
16	18773904	G	A	PASS	A	intron_variant	MODIFIER	LOC102155425	102155425	transcript	XR_002614422.1	pseudogene	2	n.213-71G>A
16	18773904	G	A	PASS	A	intron_variant	MODIFIER	LOC102155425	102155425	transcript	XR_002614421.1	pseudogene	3	n.360-71G>A
16	21799222	A	C	PASS	C	intron_variant	MODIFIER	PSD3	606759	transcript	XM_005629758.3	protein_coding	1	c.727-24080T>G
16	21799222	A	C	PASS	C	intron_variant	MODIFIER	PSD3	606759	transcript	XM_022403939.1	protein_coding	1	c.727-24080T>G
16	21799222	A	C	PASS	C	intron_variant	MODIFIER	PSD3	606759	transcript	XR_002614603.1	pseudogene	1	n.742-24080T>G
16	23689829	A	T	PASS	T	intron_variant	MODIFIER	KAT6A	100683464	transcript	XM_022403981.1	protein_coding	9	c.1546-3402A>T
16	23689829	A	T	PASS	T	intron_variant	MODIFIER	KAT6A	100683464	transcript	XM_022403984.1	protein_coding	9	c.1480-3402A>T
16	23689829	A	T	PASS	T	intron_variant	MODIFIER	KAT6A	100683464	transcript	XM_022403982.1	protein_coding	9	c.1525-3402A>T
16	23689829	A	T	PASS	T	intron_variant	MODIFIER	KAT6A	100683464	transcript	XM_022403983.1	protein_coding	8	c.1480-3402A>T
16	23689829	A	T	PASS	T	intron_variant	MODIFIER	KAT6A	100683464	transcript	XM_005629810.3	protein_coding	8	c.1000-3402A>T
16	23689829	A	T	PASS	T	intron_variant	MODIFIER	KAT6A	100683464	transcript	XM_005629811.3	protein_coding	7	c.934-3402A>T
16	34878648	GAAAAGAAAGA	G	PASS	G	intron_variant	MODIFIER	TNKS	475603	transcript	XM_844295.5	protein_coding	12	c.1922-2269_1922-2260delTCTTTCTTTT
16	42852803	C	CTT	PASS	CTT	intergenic_region	MODIFIER	LOC100688919-TRIML1	100688919-475619	intergenic_region	100688919-475619		-1	n.42852803_42852804insTT
16	52882335	A	AGCCCGTT	PASS	AGCCCGTT	upstream_gene_variant	MODIFIER	VEGFC	482932	transcript	XM_540047.6	protein_coding	-1	c.-922_-921insGCCCGTT
16	52882335	A	AGCCCGTT	PASS	AGCCCGTT	intergenic_region	MODIFIER	LOC100685699-VEGFC	100685699-482932	intergenic_region	100685699-482932		-1	n.52882335_52882336insGCCCGTT
16	52882337	C	G	PASS	G	upstream_gene_variant	MODIFIER	VEGFC	482932	transcript	XM_540047.6	protein_coding	-1	c.-920C>G
16	52882337	C	G	PASS	G	intergenic_region	MODIFIER	LOC100685699-VEGFC	100685699-482932	intergenic_region	100685699-482932		-1	n.52882337C>G
16	56000902	G	A	GATKstd	A	intron_variant	MODIFIER	CSMD1	100683465	transcript	XM_014120099.1	protein_coding	5	c.740+73308C>T
16	56092617	G	A	GATKstd	A	intron_variant	MODIFIER	CSMD1	100683465	transcript	XM_014120099.1	protein_coding	4	c.532+9157C>T
16	56096057	G	T	PASS	T	intron_variant	MODIFIER	CSMD1	100683465	transcript	XM_014120099.1	protein_coding	4	c.532+5717C>A
16	56260434	T	C	PASS	C	intron_variant	MODIFIER	CSMD1	100683465	transcript	XM_014120099.1	protein_coding	3	c.338-158466A>G
16	56444901	TATATATATAC	T	PASS	T	intron_variant	MODIFIER	CSMD1	100683465	transcript	XM_014120099.1	protein_coding	3	c.337+7821_337+7830delGTATATATAT
16	56896740	A	AG	PASS	AG	intergenic_region	MODIFIER	CSMD1-LOC102154357	100683465-102154357	intergenic_region	100683465-102154357		-1	n.56896740_56896741insG
16	56896741	A	AC	PASS	AC	intergenic_region	MODIFIER	CSMD1-LOC102154357	100683465-102154357	intergenic_region	100683465-102154357		-1	n.56896741_56896742insC
16	57089556	G	A	PASS	A	intergenic_region	MODIFIER	LOC102154357-LOC111090196	102154357-111090196	intergenic_region	102154357-111090196		-1	n.57089556G>A
16	57276133	G	A	PASS	A	intergenic_region	MODIFIER	LOC111090364-LOC102154543	111090364-102154543	intergenic_region	111090364-102154543		-1	n.57276133G>A
16	59413285	C	T	PASS	T	intergenic_region	MODIFIER	LOC102152737-LOC102155064	102152737-102155064	intergenic_region	102152737-102155064		-1	n.59413285C>T
17	19754922	A	C	PASS	C	intron_variant	MODIFIER	DTNB	482997	transcript	XM_014120423.2	protein_coding	8	c.877-16786T>G
17	19754922	A	C	PASS	C	intron_variant	MODIFIER	DTNB	482997	transcript	XM_005630219.3	protein_coding	8	c.877-16786T>G
17	19754922	A	C	PASS	C	intron_variant	MODIFIER	DTNB	482997	transcript	XM_005630217.3	protein_coding	8	c.877-16786T>G
17	19754922	A	C	PASS	C	intron_variant	MODIFIER	DTNB	482997	transcript	XM_005630218.3	protein_coding	8	c.877-16786T>G
17	19754922	A	C	PASS	C	intron_variant	MODIFIER	DTNB	482997	transcript	XM_005630221.3	protein_coding	8	c.877-16786T>G
17	19754922	A	C	PASS	C	intron_variant	MODIFIER	DTNB	482997	transcript	XM_005630222.3	protein_coding	8	c.877-16786T>G
17	19754922	A	C	PASS	C	intron_variant	MODIFIER	DTNB	482997	transcript	XM_540111.6	protein_coding	8	c.877-16786T>G
17	19754922	A	C	PASS	C	intron_variant	MODIFIER	DTNB	482997	transcript	XM_005630220.3	protein_coding	8	c.877-16786T>G
17	19754922	A	C	PASS	C	intron_variant	MODIFIER	DTNB	482997	transcript	XM_014120424.2	protein_coding	8	c.877-16786T>G
17	33953459	A	C	PASS	C	downstream_gene_variant	MODIFIER	COX7A2L	475739	transcript	XM_532946.6	protein_coding	-1	c.*2162T>G
17	33953459	A	C	PASS	C	downstream_gene_variant	MODIFIER	COX7A2L	475739	transcript	XM_022404673.1	protein_coding	-1	c.*2162T>G
17	33953459	A	C	PASS	C	intergenic_region	MODIFIER	LOC111090591-COX7A2L	111090591-475739	intergenic_region	111090591-475739		-1	n.33953459A>C
17	38919722	C	G	PASS	G	intron_variant	MODIFIER	MRPL35	612007	transcript	XM_849732.5	protein_coding	1	c.44-2133G>C
17	51931227	G	GCC	PASS	GCC	intergenic_region	MODIFIER	SYT6-LOC111090443	483127-111090443	intergenic_region	483127-111090443		-1	n.51931227_51931228insCC
17	59502402	C	T	PASS	T	upstream_gene_variant	MODIFIER	CA14	100855809	transcript	XM_022404958.1	protein_coding	-1	c.-1901C>T
17	59502402	C	T	PASS	T	upstream_gene_variant	MODIFIER	CA14	100855809	transcript	XM_003639624.4	protein_coding	-1	c.-1901C>T
17	59502402	C	T	PASS	T	upstream_gene_variant	MODIFIER	CA14	100855809	transcript	XM_022404959.1	protein_coding	-1	c.-1901C>T
17	59502402	C	T	PASS	T	upstream_gene_variant	MODIFIER	CA14	100855809	transcript	XM_022404960.1	protein_coding	-1	c.-1901C>T
17	59502402	C	T	PASS	T	upstream_gene_variant	MODIFIER	CA14	100855809	transcript	XM_022404961.1	protein_coding	-1	c.-1901C>T
17	59502402	C	T	PASS	T	downstream_gene_variant	MODIFIER	LOC102155961	102155961	transcript	XR_002615523.1	pseudogene	-1	n.*161G>A
17	59502402	C	T	PASS	T	intergenic_region	MODIFIER	ANP32E-LOC102155961	100855771-102155961	intergenic_region	100855771-102155961		-1	n.59502402C>T
17	64209735	C	CAAAA	PASS	CAAAA	intergenic_region	MODIFIER	LOC111090745-LOC491532	111090745-491532	intergenic_region	111090745-491532		-1	n.64209735_64209736insAAAA
18	1742290	G	A	PASS	A	intron_variant	MODIFIER	IKZF1	483231	transcript	XM_005630898.2	protein_coding	7	c.1018+1760G>A
18	1742290	G	A	PASS	A	intron_variant	MODIFIER	IKZF1	483231	transcript	XM_005630901.2	protein_coding	7	c.850+1760G>A
18	1742290	G	A	PASS	A	intron_variant	MODIFIER	IKZF1	483231	transcript	XM_003432293.3	protein_coding	5	c.601+1790G>A
18	1742290	G	A	PASS	A	intron_variant	MODIFIER	IKZF1	483231	transcript	XM_003432292.3	protein_coding	5	c.631+1760G>A
18	1742290	G	A	PASS	A	intron_variant	MODIFIER	IKZF1	483231	transcript	XM_003432290.3	protein_coding	6	c.727+1790G>A
18	1742290	G	A	PASS	A	intron_variant	MODIFIER	IKZF1	483231	transcript	XM_003432287.3	protein_coding	6	c.757+1760G>A
18	1742290	G	A	PASS	A	intron_variant	MODIFIER	IKZF1	483231	transcript	XM_003432288.3	protein_coding	6	c.892+1760G>A
18	1742290	G	A	PASS	A	intron_variant	MODIFIER	IKZF1	483231	transcript	XM_003432291.3	protein_coding	5	c.758-6730G>A
18	1742290	G	A	PASS	A	intron_variant	MODIFIER	IKZF1	483231	transcript	XM_005630899.2	protein_coding	7	c.988+1790G>A
18	1742290	G	A	PASS	A	intron_variant	MODIFIER	IKZF1	483231	transcript	XM_005630900.2	protein_coding	6	c.883+5057G>A
18	1742290	G	A	PASS	A	intron_variant	MODIFIER	IKZF1	483231	transcript	XM_003432295.4	protein_coding	4	c.329-6730G>A
18	1742290	G	A	PASS	A	intron_variant	MODIFIER	IKZF1	483231	transcript	XM_003432289.4	protein_coding	7	c.850+1760G>A
18	2052144	G	A	PASS	A	non_coding_transcript_exon_variant	MODIFIER	LOC111090857	111090857	transcript	XR_002615656.1	pseudogene	2	n.1872G>A
18	2284169	C	CA	PASS	CA	intron_variant	MODIFIER	COBL	607873	transcript	XM_022405161.1	protein_coding	7	c.994-13130_994-13129insT
18	2284169	C	CA	PASS	CA	intron_variant	MODIFIER	COBL	607873	transcript	XM_022405163.1	protein_coding	8	c.1039-13130_1039-13129insT
18	2284169	C	CA	PASS	CA	intron_variant	MODIFIER	COBL	607873	transcript	XM_022405162.1	protein_coding	6	c.919-13130_919-13129insT
18	3469812	A	AAAAAG	PASS	AAAAAG	intergenic_region	MODIFIER	LOC102157017-LOC100687611	102157017-100687611	intergenic_region	102157017-100687611		-1	n.3469812_3469813insAAAAG
18	5218658	G	T	PASS	T	intergenic_region	MODIFIER	LOC111090797-VSTM2A	111090797-608324	intergenic_region	111090797-608324		-1	n.5218658G>T
18	6358998	AT	A	PASS	A	intron_variant	MODIFIER	VOPP1	608562	transcript	XM_005630916.2	protein_coding	1	c.255+27695delA
18	11965085	C	T	PASS	T	downstream_gene_variant	MODIFIER	LOC111090887	111090887	transcript	XR_002615738.1	pseudogene	-1	n.*3020G>A
18	11965085	C	T	PASS	T	intergenic_region	MODIFIER	LOC100683828-LOC111090887	100683828-111090887	intergenic_region	100683828-111090887		-1	n.11965085C>T
18	18843600	T	TC	PASS	TC	intron_variant	MODIFIER	MAGI2	475904	transcript	XM_022405247.1	protein_coding	2	c.163+86344_163+86345insG
18	18843600	T	TC	PASS	TC	intron_variant	MODIFIER	MAGI2	475904	transcript	XM_022405251.1	protein_coding	2	c.163+86344_163+86345insG
18	18843600	T	TC	PASS	TC	intron_variant	MODIFIER	MAGI2	475904	transcript	XM_022405248.1	protein_coding	2	c.163+86344_163+86345insG
18	18843600	T	TC	PASS	TC	intron_variant	MODIFIER	MAGI2	475904	transcript	XM_022405255.1	protein_coding	2	c.163+86344_163+86345insG
18	18843600	T	TC	PASS	TC	intron_variant	MODIFIER	MAGI2	475904	transcript	XM_022405257.1	protein_coding	2	c.163+86344_163+86345insG
18	18843600	T	TC	PASS	TC	intron_variant	MODIFIER	MAGI2	475904	transcript	XM_022405256.1	protein_coding	2	c.163+86344_163+86345insG
18	18843600	T	TC	PASS	TC	intron_variant	MODIFIER	MAGI2	475904	transcript	XM_022405249.1	protein_coding	2	c.163+86344_163+86345insG
18	18843600	T	TC	PASS	TC	intron_variant	MODIFIER	MAGI2	475904	transcript	XM_022405250.1	protein_coding	2	c.163+86344_163+86345insG
18	18843600	T	TC	PASS	TC	intron_variant	MODIFIER	MAGI2	475904	transcript	XM_022405252.1	protein_coding	2	c.163+86344_163+86345insG
18	18843600	T	TC	PASS	TC	intron_variant	MODIFIER	MAGI2	475904	transcript	XM_022405254.1	protein_coding	2	c.163+86344_163+86345insG
18	18843600	T	TC	PASS	TC	intron_variant	MODIFIER	MAGI2	475904	transcript	XM_022405253.1	protein_coding	2	c.163+86344_163+86345insG
18	18843611	T	TTTC	PASS	TTTC	intron_variant	MODIFIER	MAGI2	475904	transcript	XM_022405247.1	protein_coding	2	c.163+86333_163+86334insGAA
18	18843611	T	TTTC	PASS	TTTC	intron_variant	MODIFIER	MAGI2	475904	transcript	XM_022405251.1	protein_coding	2	c.163+86333_163+86334insGAA
18	18843611	T	TTTC	PASS	TTTC	intron_variant	MODIFIER	MAGI2	475904	transcript	XM_022405248.1	protein_coding	2	c.163+86333_163+86334insGAA
18	18843611	T	TTTC	PASS	TTTC	intron_variant	MODIFIER	MAGI2	475904	transcript	XM_022405255.1	protein_coding	2	c.163+86333_163+86334insGAA
18	18843611	T	TTTC	PASS	TTTC	intron_variant	MODIFIER	MAGI2	475904	transcript	XM_022405257.1	protein_coding	2	c.163+86333_163+86334insGAA
18	18843611	T	TTTC	PASS	TTTC	intron_variant	MODIFIER	MAGI2	475904	transcript	XM_022405256.1	protein_coding	2	c.163+86333_163+86334insGAA
18	18843611	T	TTTC	PASS	TTTC	intron_variant	MODIFIER	MAGI2	475904	transcript	XM_022405249.1	protein_coding	2	c.163+86333_163+86334insGAA
18	18843611	T	TTTC	PASS	TTTC	intron_variant	MODIFIER	MAGI2	475904	transcript	XM_022405250.1	protein_coding	2	c.163+86333_163+86334insGAA
18	18843611	T	TTTC	PASS	TTTC	intron_variant	MODIFIER	MAGI2	475904	transcript	XM_022405252.1	protein_coding	2	c.163+86333_163+86334insGAA
18	18843611	T	TTTC	PASS	TTTC	intron_variant	MODIFIER	MAGI2	475904	transcript	XM_022405254.1	protein_coding	2	c.163+86333_163+86334insGAA
18	18843611	T	TTTC	PASS	TTTC	intron_variant	MODIFIER	MAGI2	475904	transcript	XM_022405253.1	protein_coding	2	c.163+86333_163+86334insGAA
18	18843615	C	CTTTCTT	PASS	CTTTCTT	intron_variant	MODIFIER	MAGI2	475904	transcript	XM_022405247.1	protein_coding	2	c.163+86329_163+86330insAAGAAA
18	18843615	C	CTTTCTT	PASS	CTTTCTT	intron_variant	MODIFIER	MAGI2	475904	transcript	XM_022405251.1	protein_coding	2	c.163+86329_163+86330insAAGAAA
18	18843615	C	CTTTCTT	PASS	CTTTCTT	intron_variant	MODIFIER	MAGI2	475904	transcript	XM_022405248.1	protein_coding	2	c.163+86329_163+86330insAAGAAA
18	18843615	C	CTTTCTT	PASS	CTTTCTT	intron_variant	MODIFIER	MAGI2	475904	transcript	XM_022405255.1	protein_coding	2	c.163+86329_163+86330insAAGAAA
18	18843615	C	CTTTCTT	PASS	CTTTCTT	intron_variant	MODIFIER	MAGI2	475904	transcript	XM_022405257.1	protein_coding	2	c.163+86329_163+86330insAAGAAA
18	18843615	C	CTTTCTT	PASS	CTTTCTT	intron_variant	MODIFIER	MAGI2	475904	transcript	XM_022405256.1	protein_coding	2	c.163+86329_163+86330insAAGAAA
18	18843615	C	CTTTCTT	PASS	CTTTCTT	intron_variant	MODIFIER	MAGI2	475904	transcript	XM_022405249.1	protein_coding	2	c.163+86329_163+86330insAAGAAA
18	18843615	C	CTTTCTT	PASS	CTTTCTT	intron_variant	MODIFIER	MAGI2	475904	transcript	XM_022405250.1	protein_coding	2	c.163+86329_163+86330insAAGAAA
18	18843615	C	CTTTCTT	PASS	CTTTCTT	intron_variant	MODIFIER	MAGI2	475904	transcript	XM_022405252.1	protein_coding	2	c.163+86329_163+86330insAAGAAA
18	18843615	C	CTTTCTT	PASS	CTTTCTT	intron_variant	MODIFIER	MAGI2	475904	transcript	XM_022405254.1	protein_coding	2	c.163+86329_163+86330insAAGAAA
18	18843615	C	CTTTCTT	PASS	CTTTCTT	intron_variant	MODIFIER	MAGI2	475904	transcript	XM_022405253.1	protein_coding	2	c.163+86329_163+86330insAAGAAA
18	18843618	C	CTTTTTTTTCTTTCTTTT	PASS	CTTTTTTTTCTTTCTTTT	intron_variant	MODIFIER	MAGI2	475904	transcript	XM_022405247.1	protein_coding	2	c.163+86326_163+86327insAAAAGAAAGAAAAAAAA
18	18843618	C	CTTTTTTTTCTTTCTTTT	PASS	CTTTTTTTTCTTTCTTTT	intron_variant	MODIFIER	MAGI2	475904	transcript	XM_022405251.1	protein_coding	2	c.163+86326_163+86327insAAAAGAAAGAAAAAAAA
18	18843618	C	CTTTTTTTTCTTTCTTTT	PASS	CTTTTTTTTCTTTCTTTT	intron_variant	MODIFIER	MAGI2	475904	transcript	XM_022405248.1	protein_coding	2	c.163+86326_163+86327insAAAAGAAAGAAAAAAAA
18	18843618	C	CTTTTTTTTCTTTCTTTT	PASS	CTTTTTTTTCTTTCTTTT	intron_variant	MODIFIER	MAGI2	475904	transcript	XM_022405255.1	protein_coding	2	c.163+86326_163+86327insAAAAGAAAGAAAAAAAA
18	18843618	C	CTTTTTTTTCTTTCTTTT	PASS	CTTTTTTTTCTTTCTTTT	intron_variant	MODIFIER	MAGI2	475904	transcript	XM_022405257.1	protein_coding	2	c.163+86326_163+86327insAAAAGAAAGAAAAAAAA
18	18843618	C	CTTTTTTTTCTTTCTTTT	PASS	CTTTTTTTTCTTTCTTTT	intron_variant	MODIFIER	MAGI2	475904	transcript	XM_022405256.1	protein_coding	2	c.163+86326_163+86327insAAAAGAAAGAAAAAAAA
18	18843618	C	CTTTTTTTTCTTTCTTTT	PASS	CTTTTTTTTCTTTCTTTT	intron_variant	MODIFIER	MAGI2	475904	transcript	XM_022405249.1	protein_coding	2	c.163+86326_163+86327insAAAAGAAAGAAAAAAAA
18	18843618	C	CTTTTTTTTCTTTCTTTT	PASS	CTTTTTTTTCTTTCTTTT	intron_variant	MODIFIER	MAGI2	475904	transcript	XM_022405250.1	protein_coding	2	c.163+86326_163+86327insAAAAGAAAGAAAAAAAA
18	18843618	C	CTTTTTTTTCTTTCTTTT	PASS	CTTTTTTTTCTTTCTTTT	intron_variant	MODIFIER	MAGI2	475904	transcript	XM_022405252.1	protein_coding	2	c.163+86326_163+86327insAAAAGAAAGAAAAAAAA
18	18843618	C	CTTTTTTTTCTTTCTTTT	PASS	CTTTTTTTTCTTTCTTTT	intron_variant	MODIFIER	MAGI2	475904	transcript	XM_022405254.1	protein_coding	2	c.163+86326_163+86327insAAAAGAAAGAAAAAAAA
18	18843618	C	CTTTTTTTTCTTTCTTTT	PASS	CTTTTTTTTCTTTCTTTT	intron_variant	MODIFIER	MAGI2	475904	transcript	XM_022405253.1	protein_coding	2	c.163+86326_163+86327insAAAAGAAAGAAAAAAAA
18	18901477	A	C	PASS	C	intron_variant	MODIFIER	MAGI2	475904	transcript	XM_022405247.1	protein_coding	2	c.163+28468T>G
18	18901477	A	C	PASS	C	intron_variant	MODIFIER	MAGI2	475904	transcript	XM_022405251.1	protein_coding	2	c.163+28468T>G
18	18901477	A	C	PASS	C	intron_variant	MODIFIER	MAGI2	475904	transcript	XM_022405248.1	protein_coding	2	c.163+28468T>G
18	18901477	A	C	PASS	C	intron_variant	MODIFIER	MAGI2	475904	transcript	XM_022405255.1	protein_coding	2	c.163+28468T>G
18	18901477	A	C	PASS	C	intron_variant	MODIFIER	MAGI2	475904	transcript	XM_022405257.1	protein_coding	2	c.163+28468T>G
18	18901477	A	C	PASS	C	intron_variant	MODIFIER	MAGI2	475904	transcript	XM_022405256.1	protein_coding	2	c.163+28468T>G
18	18901477	A	C	PASS	C	intron_variant	MODIFIER	MAGI2	475904	transcript	XM_022405249.1	protein_coding	2	c.163+28468T>G
18	18901477	A	C	PASS	C	intron_variant	MODIFIER	MAGI2	475904	transcript	XM_022405250.1	protein_coding	2	c.163+28468T>G
18	18901477	A	C	PASS	C	intron_variant	MODIFIER	MAGI2	475904	transcript	XM_022405252.1	protein_coding	2	c.163+28468T>G
18	18901477	A	C	PASS	C	intron_variant	MODIFIER	MAGI2	475904	transcript	XM_022405254.1	protein_coding	2	c.163+28468T>G
18	18901477	A	C	PASS	C	intron_variant	MODIFIER	MAGI2	475904	transcript	XM_022405253.1	protein_coding	2	c.163+28468T>G
18	19162627	C	T	PASS	T	intergenic_region	MODIFIER	MAGI2-LOC102155549	475904-102155549	intergenic_region	475904-102155549		-1	n.19162627C>T
18	19431122	C	A	PASS	A	intergenic_region	MODIFIER	LOC102155549-GNAI1	102155549-478227	intergenic_region	102155549-478227		-1	n.19431122C>A
18	19636784	G	A	PASS	A	intergenic_region	MODIFIER	LOC102155549-GNAI1	102155549-478227	intergenic_region	102155549-478227		-1	n.19636784G>A
18	20031278	T	C	PASS	C	intergenic_region	MODIFIER	GNAI1-GNAT3	478227-491406	intergenic_region	478227-491406		-1	n.20031278T>C
18	24565052	G	A	PASS	A	intergenic_region	MODIFIER	LOC111090920-LOC111090831	111090920-111090831	intergenic_region	111090920-111090831		-1	n.24565052G>A
18	25176882	G	T	PASS	T	intron_variant	MODIFIER	2021-09-14	483382	transcript	XM_022405269.1	protein_coding	6	c.766-9080G>T
18	25176882	G	T	PASS	T	intron_variant	MODIFIER	2021-09-14	483382	transcript	XM_022405271.1	protein_coding	6	c.766-9080G>T
18	25176882	G	T	PASS	T	intron_variant	MODIFIER	2021-09-14	483382	transcript	XM_022405270.1	protein_coding	6	c.721-9080G>T
18	25176882	G	T	PASS	T	intron_variant	MODIFIER	2021-09-14	483382	transcript	XM_540501.5	protein_coding	6	c.721-9080G>T
18	25176882	G	T	PASS	T	intron_variant	MODIFIER	2021-09-14	483382	transcript	XM_022405272.1	protein_coding	4	c.184-9080G>T
18	25192610	C	T	PASS	T	intron_variant	MODIFIER	2021-09-14	483382	transcript	XM_022405269.1	protein_coding	9	c.1164+1392C>T
18	25192610	C	T	PASS	T	intron_variant	MODIFIER	2021-09-14	483382	transcript	XM_022405271.1	protein_coding	8	c.1031+4699C>T
18	25192610	C	T	PASS	T	intron_variant	MODIFIER	2021-09-14	483382	transcript	XM_022405270.1	protein_coding	9	c.1119+1392C>T
18	25192610	C	T	PASS	T	intron_variant	MODIFIER	2021-09-14	483382	transcript	XM_540501.5	protein_coding	9	c.1119+1392C>T
18	25192610	C	T	PASS	T	intron_variant	MODIFIER	2021-09-14	483382	transcript	XM_022405272.1	protein_coding	7	c.582+1392C>T
18	25455566	A	C	PASS	C	downstream_gene_variant	MODIFIER	LOC606890	606890	transcript	XM_843371.4	protein_coding	-1	c.*3991T>G
18	25455566	A	C	PASS	C	intergenic_region	MODIFIER	PGGHG-LOC606890	483395-606890	intergenic_region	483395-606890		-1	n.25455566A>C
18	25864584	G	A	PASS	A	downstream_gene_variant	MODIFIER	ALKBH3	475938	transcript	XR_002615825.1	pseudogene	-1	n.*545C>T
18	25864584	G	A	PASS	A	downstream_gene_variant	MODIFIER	ALKBH3	475938	transcript	XR_002615826.1	pseudogene	-1	n.*545C>T
18	25864584	G	A	PASS	A	downstream_gene_variant	MODIFIER	ALKBH3	475938	transcript	XM_022405294.1	protein_coding	-1	c.*6348C>T
18	25864584	G	A	PASS	A	intron_variant	MODIFIER	ALKBH3	475938	transcript	XM_022405292.1	protein_coding	10	c.880-186C>T
18	25864584	G	A	PASS	A	intron_variant	MODIFIER	ALKBH3	475938	transcript	XM_533147.5	protein_coding	9	c.769-186C>T
18	25864584	G	A	PASS	A	intron_variant	MODIFIER	ALKBH3	475938	transcript	XM_022405293.1	protein_coding	9	c.790-186C>T
18	25864584	G	A	PASS	A	intron_variant	MODIFIER	ALKBH3	475938	transcript	XM_005631094.2	protein_coding	10	c.859-186C>T
18	26568803	C	T	PASS	T	intergenic_region	MODIFIER	API5-LOC111090807	483413-111090807	intergenic_region	483413-111090807		-1	n.26568803C>T
18	26902798	G	A	PASS	A	intron_variant	MODIFIER	LOC111090928	111090928	transcript	XR_002615833.1	pseudogene	2	n.369-6816G>A
18	26902798	G	A	PASS	A	intron_variant	MODIFIER	LOC111090928	111090928	transcript	XR_002615834.1	pseudogene	2	n.369-6816G>A
18	26998883	G	A	PASS	A	intergenic_region	MODIFIER	LOC111090928-LOC111090929	111090928-111090929	intergenic_region	111090928-111090929		-1	n.26998883G>A
18	27076720	T	C	PASS	C	intergenic_region	MODIFIER	LOC111090928-LOC111090929	111090928-111090929	intergenic_region	111090928-111090929		-1	n.27076720T>C
18	27333463	G	A	PASS	A	intergenic_region	MODIFIER	LOC111090928-LOC111090929	111090928-111090929	intergenic_region	111090928-111090929		-1	n.27333463G>A
18	27512676	T	G	PASS	G	intergenic_region	MODIFIER	LOC111090929-LOC102151311	111090929-102151311	intergenic_region	111090929-102151311		-1	n.27512676T>G
18	31362588	T	C	PASS	C	intron_variant	MODIFIER	LOC102151911	102151911	transcript	XR_002615843.1	pseudogene	3	n.534+10733A>G
18	31362588	T	C	PASS	C	intron_variant	MODIFIER	LOC102151911	102151911	transcript	XR_002615837.1	pseudogene	3	n.534+10733A>G
18	31362588	T	C	PASS	C	intron_variant	MODIFIER	LOC102151911	102151911	transcript	XR_002615842.1	pseudogene	3	n.534+10733A>G
18	31362588	T	C	PASS	C	intron_variant	MODIFIER	LOC102151911	102151911	transcript	XR_002615836.1	pseudogene	3	n.534+10733A>G
18	31362588	T	C	PASS	C	intron_variant	MODIFIER	LOC102151911	102151911	transcript	XR_002615839.1	pseudogene	3	n.448+10819A>G
18	31362588	T	C	PASS	C	intron_variant	MODIFIER	LOC102151911	102151911	transcript	XR_002615841.1	pseudogene	3	n.534+10733A>G
18	31362588	T	C	PASS	C	intron_variant	MODIFIER	LOC102151911	102151911	transcript	XR_002615838.1	pseudogene	3	n.534+10733A>G
18	31362588	T	C	PASS	C	intron_variant	MODIFIER	LOC102151911	102151911	transcript	XR_002615840.1	pseudogene	3	n.534+10733A>G
18	31637543	GA	G	PASS	G	intron_variant	MODIFIER	RAG1	483420	transcript	XM_540538.2	protein_coding	1	c.-15+2344delT
18	39227978	TAA	T	PASS	T	downstream_gene_variant	MODIFIER	LOC610298	610298	transcript	XM_847768.2	protein_coding	-1	c.*534_*535delAA
18	39227978	TAA	T	PASS	T	intergenic_region	MODIFIER	LOC610298-LOC483506	610298-483506	intergenic_region	610298-483506		-1	n.39227979_39227980delAA
18	40249604	G	GAA	PASS	GAA	intergenic_region	MODIFIER	LOC483562-COR4Y1	483562-483564	intergenic_region	483562-483564		-1	n.40249604_40249605insAA
18	40539896	A	G	PASS	G	intergenic_region	MODIFIER	LOC100682575-LOC100686285	100682575-100686285	intergenic_region	100682575-100686285		-1	n.40539896A>G
18	42413034	G	A	GATKstd	A	downstream_gene_variant	MODIFIER	ARFGAP2	483627	transcript	XM_005631270.3	protein_coding	-1	c.*4031G>A
18	42413034	G	A	GATKstd	A	downstream_gene_variant	MODIFIER	ARFGAP2	483627	transcript	XR_002615940.1	pseudogene	-1	n.*3167G>A
18	42413034	G	A	GATKstd	A	downstream_gene_variant	MODIFIER	ARFGAP2	483627	transcript	XM_540747.6	protein_coding	-1	c.*4031G>A
18	42413034	G	A	GATKstd	A	intron_variant	MODIFIER	C18H11orf49	475985	transcript	XR_002615941.1	pseudogene	7	n.860-364C>T
18	42464871	GAAGAAAGAAGA	G	PASS	G	intron_variant	MODIFIER	C18H11orf49	475985	transcript	XR_002615941.1	pseudogene	3	n.383-32358_383-32348delTCTTCTTTCTT
18	42464871	GAAGAAAGAAGA	G	PASS	G	intron_variant	MODIFIER	LOC111090968	111090968	transcript	XR_002615945.1	pseudogene	2	n.1396+2619_1396+2629delAAGAAAGAAGA
18	42464871	GAAGAAAGAAGA	G	PASS	G	intron_variant	MODIFIER	LOC111090968	111090968	transcript	XR_002615944.1	pseudogene	2	n.1396+2619_1396+2629delAAGAAAGAAGA
19	10407198	T	G	PASS	G	intergenic_region	MODIFIER	LOC111091102-LOC111091103	111091102-111091103	intergenic_region	111091102-111091103		-1	n.10407198T>G
2	5629891	G	A	PASS	A	upstream_gene_variant	MODIFIER	LOC111094389	111094389	transcript	XR_002623629.1	pseudogene	-1	n.-4552C>T
2	5629891	G	A	PASS	A	intron_variant	MODIFIER	LOC111091106	111091106	transcript	XM_022405927.1	protein_coding	6	c.940-764C>T
2	5815026	A	AG	PASS	AG	intron_variant	MODIFIER	LOC111091106	111091106	transcript	XM_022405927.1	protein_coding	3	c.547-168341_547-168340insC
2	8441409	C	T	PASS	T	intergenic_region	MODIFIER	GPR158-THNSL1	477984-477983	intergenic_region	477984-477983		-1	n.8441409C>T
2	14453084	A	G	PASS	G	intergenic_region	MODIFIER	LOC111094508-LOC111091357	111094508-111091357	intergenic_region	111094508-111091357		-1	n.14453084A>G
2	36164393	A	T	PASS	T	upstream_gene_variant	MODIFIER	LOC106557821	106557821	transcript	XM_014107774.2	protein_coding	-1	c.-1788A>T
2	36164393	A	T	PASS	T	downstream_gene_variant	MODIFIER	LOC106557817	106557817	transcript	XM_014107753.2	protein_coding	-1	c.*3563A>T
2	36164393	A	T	PASS	T	intergenic_region	MODIFIER	LOC106557817-LOC106557821	106557817-106557821	intergenic_region	106557817-106557821		-1	n.36164393A>T
2	41807792	TGTG	T	PASS	T	intron_variant	MODIFIER	DPYSL3	487204	transcript	XM_014108278.2	protein_coding	1	c.48+1545_48+1547delCAC
2	52859334	T	TGCC	PASS	TGCC	intron_variant	MODIFIER	LOC111092486	111092486	transcript	XR_002619477.1	pseudogene	6	n.593+361_593+362insGCC
2	52859334	T	TGCC	PASS	TGCC	intron_variant	MODIFIER	LOC111092486	111092486	transcript	XR_002619480.1	pseudogene	6	n.593+361_593+362insGCC
2	52859334	T	TGCC	PASS	TGCC	intron_variant	MODIFIER	LOC111092486	111092486	transcript	XR_002619468.1	pseudogene	6	n.593+361_593+362insGCC
2	52859334	T	TGCC	PASS	TGCC	intron_variant	MODIFIER	LOC111092486	111092486	transcript	XR_002619470.1	pseudogene	6	n.593+361_593+362insGCC
2	52859334	T	TGCC	PASS	TGCC	intron_variant	MODIFIER	LOC111092486	111092486	transcript	XR_002619469.1	pseudogene	6	n.593+361_593+362insGCC
2	52859334	T	TGCC	PASS	TGCC	intron_variant	MODIFIER	LOC111092486	111092486	transcript	XR_002619471.1	pseudogene	6	n.620+361_620+362insGCC
2	71675232	G	A	PASS	A	upstream_gene_variant	MODIFIER	EPB41	442955	transcript	XM_022405408.1	protein_coding	-1	c.-90973C>T
2	71675232	G	A	PASS	A	upstream_gene_variant	MODIFIER	EPB41	442955	transcript	XM_022405415.1	protein_coding	-1	c.-97970C>T
2	71675232	G	A	PASS	A	intergenic_region	MODIFIER	EPB41-OPRD1	442955-487329	intergenic_region	442955-487329		-1	n.71675232G>A
2	78454172	A	C	PASS	C	intergenic_region	MODIFIER	LOC102157062-LOC111093718	102157062-111093718	intergenic_region	102157062-111093718		-1	n.78454172A>C
2	82164316	T	G	PASS	G	intron_variant	MODIFIER	FHAD1	478221	transcript	XM_022414360.1	protein_coding	13	c.1885+3646A>C
2	82164316	T	G	PASS	G	intron_variant	MODIFIER	FHAD1	478221	transcript	XM_005617969.3	protein_coding	13	c.1885+3646A>C
2	82164316	T	G	PASS	G	intron_variant	MODIFIER	FHAD1	478221	transcript	XM_005617972.3	protein_coding	13	c.1885+3646A>C
2	82164316	T	G	PASS	G	intron_variant	MODIFIER	FHAD1	478221	transcript	XM_022414365.1	protein_coding	13	c.1885+3646A>C
2	82164316	T	G	PASS	G	intron_variant	MODIFIER	FHAD1	478221	transcript	XM_022414373.1	protein_coding	13	c.1885+3646A>C
2	82164316	T	G	PASS	G	intron_variant	MODIFIER	FHAD1	478221	transcript	XM_022414378.1	protein_coding	13	c.1885+3646A>C
20	1513189	T	G	PASS	G	downstream_gene_variant	MODIFIER	LOC111091219	111091219	transcript	XR_002616524.1	pseudogene	-1	n.*1842A>C
20	1513189	T	G	PASS	G	downstream_gene_variant	MODIFIER	LOC111091219	111091219	transcript	XR_002616523.1	pseudogene	-1	n.*1842A>C
20	1513189	T	G	PASS	G	intergenic_region	MODIFIER	LOC100688943-LOC111091219	100688943-111091219	intergenic_region	100688943-111091219		-1	n.1513189T>G
20	5925975	T	TA	PASS	TA	intron_variant	MODIFIER	RAF1	484648	transcript	XM_005632141.1	protein_coding	1	c.-26-17386_-26-17385insA
20	5925975	T	TA	PASS	TA	intron_variant	MODIFIER	RAF1	484648	transcript	XM_854141.3	protein_coding	1	c.-26-17386_-26-17385insA
20	5925975	T	TA	PASS	TA	intron_variant	MODIFIER	RAF1	484648	transcript	XM_022406357.1	protein_coding	1	c.-26-17386_-26-17385insA
20	10361346	G	A	PASS	A	intron_variant	MODIFIER	GRM7	484674	transcript	XM_005632224.3	protein_coding	8	c.2451+24282C>T
20	10361346	G	A	PASS	A	intron_variant	MODIFIER	LOC111091249	111091249	transcript	XR_002616617.1	pseudogene	6	n.656+458G>A
20	10361346	G	A	PASS	A	intron_variant	MODIFIER	GRM7	484674	transcript	XM_003432748.4	protein_coding	8	c.2451+24282C>T
20	10361346	G	A	PASS	A	intron_variant	MODIFIER	GRM7	484674	transcript	XM_541789.6	protein_coding	8	c.2451+24282C>T
20	10361346	G	A	PASS	A	intron_variant	MODIFIER	GRM7	484674	transcript	XM_014121680.2	protein_coding	8	c.2451+24282C>T
20	10361346	G	A	PASS	A	intron_variant	MODIFIER	LOC111091249	111091249	transcript	XR_002616616.1	pseudogene	5	n.597+458G>A
20	10361346	G	A	PASS	A	intron_variant	MODIFIER	LOC111091249	111091249	transcript	XR_002616618.1	pseudogene	5	n.636+458G>A
20	10374562	G	A	PASS	A	intron_variant	MODIFIER	GRM7	484674	transcript	XM_005632224.3	protein_coding	8	c.2451+11066C>T
20	10374562	G	A	PASS	A	intron_variant	MODIFIER	GRM7	484674	transcript	XM_003432748.4	protein_coding	8	c.2451+11066C>T
20	10374562	G	A	PASS	A	intron_variant	MODIFIER	GRM7	484674	transcript	XM_541789.6	protein_coding	8	c.2451+11066C>T
20	10374562	G	A	PASS	A	intron_variant	MODIFIER	GRM7	484674	transcript	XM_014121680.2	protein_coding	8	c.2451+11066C>T
20	10643022	C	T	PASS	T	intron_variant	MODIFIER	GRM7	484674	transcript	XM_005632224.3	protein_coding	3	c.879-1551G>A
20	10643022	C	T	PASS	T	intron_variant	MODIFIER	GRM7	484674	transcript	XM_003432748.4	protein_coding	3	c.879-1551G>A
20	10643022	C	T	PASS	T	intron_variant	MODIFIER	GRM7	484674	transcript	XM_541789.6	protein_coding	3	c.879-1551G>A
20	10643022	C	T	PASS	T	intron_variant	MODIFIER	GRM7	484674	transcript	XM_014121680.2	protein_coding	3	c.879-1551G>A
20	10643042	C	T	PASS	T	intron_variant	MODIFIER	GRM7	484674	transcript	XM_005632224.3	protein_coding	3	c.879-1571G>A
20	10643042	C	T	PASS	T	intron_variant	MODIFIER	GRM7	484674	transcript	XM_003432748.4	protein_coding	3	c.879-1571G>A
20	10643042	C	T	PASS	T	intron_variant	MODIFIER	GRM7	484674	transcript	XM_541789.6	protein_coding	3	c.879-1571G>A
20	10643042	C	T	PASS	T	intron_variant	MODIFIER	GRM7	484674	transcript	XM_014121680.2	protein_coding	3	c.879-1571G>A
20	10648584	A	T	PASS	T	intron_variant	MODIFIER	GRM7	484674	transcript	XM_005632224.3	protein_coding	2	c.737-1214T>A
20	10648584	A	T	PASS	T	intron_variant	MODIFIER	GRM7	484674	transcript	XM_003432748.4	protein_coding	2	c.737-1214T>A
20	10648584	A	T	PASS	T	intron_variant	MODIFIER	GRM7	484674	transcript	XM_541789.6	protein_coding	2	c.737-1214T>A
20	10648584	A	T	PASS	T	intron_variant	MODIFIER	GRM7	484674	transcript	XM_014121680.2	protein_coding	2	c.737-1214T>A
20	10656168	G	A	PASS	A	intron_variant	MODIFIER	GRM7	484674	transcript	XM_005632224.3	protein_coding	2	c.737-8798C>T
20	10656168	G	A	PASS	A	intron_variant	MODIFIER	GRM7	484674	transcript	XM_003432748.4	protein_coding	2	c.737-8798C>T
20	10656168	G	A	PASS	A	intron_variant	MODIFIER	GRM7	484674	transcript	XM_541789.6	protein_coding	2	c.737-8798C>T
20	10656168	G	A	PASS	A	intron_variant	MODIFIER	GRM7	484674	transcript	XM_014121680.2	protein_coding	2	c.737-8798C>T
20	11273380	G	T	PASS	T	intron_variant	MODIFIER	LOC111091427	111091427	transcript	XR_002617019.1	pseudogene	1	n.503-45811C>A
20	11273380	G	T	PASS	T	intron_variant	MODIFIER	LOC111091427	111091427	transcript	XR_002617020.1	pseudogene	2	n.277-45811C>A
20	11404003	C	T	PASS	T	intergenic_region	MODIFIER	LOC100685541-LOC100685632	100685541-100685632	intergenic_region	100685541-100685632		-1	n.11404003C>T
20	11932009	A	G	PASS	G	intron_variant	MODIFIER	LOC102151592	102151592	transcript	XR_002616634.1	pseudogene	4	n.491+8531T>C
20	11932009	A	G	PASS	G	intron_variant	MODIFIER	LOC102151592	102151592	transcript	XR_002616633.1	pseudogene	4	n.491+8531T>C
20	12125482	A	G	PASS	G	upstream_gene_variant	MODIFIER	LOC111091428	111091428	transcript	XR_002617021.1	pseudogene	-1	n.-4367A>G
20	12125482	A	G	PASS	G	intergenic_region	MODIFIER	LOC102151640-LOC111091428	102151640-111091428	intergenic_region	102151640-111091428		-1	n.12125482A>G
20	12403020	G	A	PASS	A	intergenic_region	MODIFIER	LOC111091257-EDEM1	111091257-476547	intergenic_region	111091257-476547		-1	n.12403020G>A
20	12462753	C	T	PASS	T	intron_variant	MODIFIER	EDEM1	476547	transcript	XM_533753.4	protein_coding	4	c.622-31G>A
20	12537724	G	T	PASS	T	intergenic_region	MODIFIER	ARL8B-LOC100686032	612944-100686032	intergenic_region	612944-100686032		-1	n.12537724G>T
20	12607130	A	G	PASS	G	intergenic_region	MODIFIER	LOC100686032-BHLHE40	100686032-484680	intergenic_region	100686032-484680		-1	n.12607130A>G
20	22768425	G	T	PASS	T	intergenic_region	MODIFIER	EOGT-FAM19A4	494221-610997	intergenic_region	494221-610997		-1	n.22768425G>T
20	23550181	T	A	PASS	A	intron_variant	MODIFIER	FAM19A1	611001	transcript	XM_022406462.1	protein_coding	2	c.118+68681A>T
20	23550181	T	A	PASS	A	intron_variant	MODIFIER	FAM19A1	611001	transcript	XM_022406463.1	protein_coding	2	c.118+68681A>T
20	26925286	T	G	PASS	G	intron_variant	MODIFIER	PRICKLE2	484699	transcript	XM_005632348.3	protein_coding	2	c.128+114236T>G
20	26925286	T	G	PASS	G	intron_variant	MODIFIER	PRICKLE2	484699	transcript	XM_005632349.2	protein_coding	2	c.-41+114236T>G
20	26925286	T	G	PASS	G	intron_variant	MODIFIER	PRICKLE2	484699	transcript	XM_005632351.2	protein_coding	3	c.-41+72937T>G
20	26925286	T	G	PASS	G	intron_variant	MODIFIER	PRICKLE2	484699	transcript	XM_022406483.1	protein_coding	4	c.-41+72937T>G
20	26925286	T	G	PASS	G	intron_variant	MODIFIER	PRICKLE2	484699	transcript	XM_022406484.1	protein_coding	4	c.-41+72937T>G
20	39058465	A	C	PASS	C	5_prime_UTR_variant	MODIFIER	LSMEM2	476616	transcript	XM_022406700.1	protein_coding	1	c.-706T>G
20	39058465	A	C	PASS	C	5_prime_UTR_variant	MODIFIER	LSMEM2	476616	transcript	XM_022406701.1	protein_coding	1	c.-692T>G
20	39058465	A	C	PASS	C	5_prime_UTR_variant	MODIFIER	LSMEM2	476616	transcript	XM_022406703.1	protein_coding	1	c.-417T>G
20	39058465	A	C	PASS	C	5_prime_UTR_variant	MODIFIER	LSMEM2	476616	transcript	XM_022406704.1	protein_coding	1	c.-403T>G
20	39058465	A	C	PASS	C	upstream_gene_variant	MODIFIER	LSMEM2	476616	transcript	XM_533819.6	protein_coding	-1	c.-1010T>G
20	39058465	A	C	PASS	C	upstream_gene_variant	MODIFIER	LSMEM2	476616	transcript	XM_022406702.1	protein_coding	-1	c.-3754T>G
20	39058465	A	C	PASS	C	upstream_gene_variant	MODIFIER	LSMEM2	476616	transcript	XR_002616804.1	pseudogene	-1	n.-2403T>G
20	39058465	A	C	PASS	C	downstream_gene_variant	MODIFIER	IFRD2	484761	transcript	XM_014122055.2	protein_coding	-1	c.*5387A>C
20	39058465	A	C	PASS	C	downstream_gene_variant	MODIFIER	SEMA3B	484762	transcript	XM_022406705.1	protein_coding	-1	c.*780T>G
20	39058465	A	C	PASS	C	downstream_gene_variant	MODIFIER	IFRD2	484761	transcript	XM_022406691.1	protein_coding	-1	c.*5387A>C
20	39058465	A	C	PASS	C	downstream_gene_variant	MODIFIER	SEMA3B	484762	transcript	XM_022406707.1	protein_coding	-1	c.*780T>G
20	39058465	A	C	PASS	C	downstream_gene_variant	MODIFIER	SEMA3B	484762	transcript	XM_022406706.1	protein_coding	-1	c.*780T>G
20	45902434	C	A	PASS	A	intron_variant	MODIFIER	SMIM7	610216	transcript	XM_014122158.2	protein_coding	3	c.122-4555C>A
20	45902434	C	A	PASS	A	intron_variant	MODIFIER	SMIM7	610216	transcript	XM_847655.5	protein_coding	4	c.212+1176C>A
20	51284466	T	TG	PASS	TG	downstream_gene_variant	MODIFIER	LOC100685016	100685016	transcript	100685016	pseudogene	-1	n.*2588_*2589insG
20	51284466	T	TG	PASS	TG	intron_variant	MODIFIER	LOC100684878	100684878	transcript	XM_014122021.2	protein_coding	1	c.-117+1449_-117+1450insG
20	53294006	C	A	PASS	A	intron_variant	MODIFIER	LOC100855754	100855754	transcript	XM_003639765.1	protein_coding	11	c.1513-996G>T
20	54579565	CCCCCCCA	C	PASS	C	intron_variant	MODIFIER	PTPRS	485030	transcript	XM_022407385.1	protein_coding	1	c.-109+3533_-109+3539delCCCCCCA
21	4264790	C	A	PASS	A	intergenic_region	MODIFIER	LOC111091515-LOC100684434	111091515-100684434	intergenic_region	111091515-100684434		-1	n.4264790C>A
21	10179894	T	C	PASS	C	intron_variant	MODIFIER	LOC485139	485139	transcript	XM_005633370.3	protein_coding	15	c.1524+143A>G
21	10179894	T	C	PASS	C	intron_variant	MODIFIER	LOC485139	485139	transcript	XM_022407539.1	protein_coding	8	c.648+143A>G
21	10179894	T	C	PASS	C	intron_variant	MODIFIER	LOC485139	485139	transcript	XM_005633375.3	protein_coding	7	c.516+143A>G
21	10179894	T	C	PASS	C	intron_variant	MODIFIER	LOC485139	485139	transcript	XM_022407538.1	protein_coding	8	c.663+143A>G
21	10179894	T	C	PASS	C	intron_variant	MODIFIER	LOC485139	485139	transcript	XM_022407537.1	protein_coding	13	c.1248+143A>G
21	10179894	T	C	PASS	C	intron_variant	MODIFIER	LOC485139	485139	transcript	XM_005633372.2	protein_coding	13	c.1248+143A>G
21	10179894	T	C	PASS	C	intron_variant	MODIFIER	LOC485139	485139	transcript	XM_022407536.1	protein_coding	15	c.1410+143A>G
21	10179894	T	C	PASS	C	intron_variant	MODIFIER	LOC485139	485139	transcript	XM_005633371.3	protein_coding	15	c.1524+143A>G
21	10179894	T	C	PASS	C	intron_variant	MODIFIER	LOC485139	485139	transcript	XM_022407535.1	protein_coding	14	c.1422+143A>G
21	10179894	T	C	PASS	C	intron_variant	MODIFIER	LOC485139	485139	transcript	XM_542257.5	protein_coding	15	c.1524+143A>G
21	10215235	C	T	PASS	T	intron_variant	MODIFIER	LOC485139	485139	transcript	XM_005633370.3	protein_coding	2	c.65+3501G>A
21	10215235	C	T	PASS	T	intron_variant	MODIFIER	LOC485139	485139	transcript	XM_005633372.2	protein_coding	1	c.-81+3501G>A
21	10215235	C	T	PASS	T	intron_variant	MODIFIER	LOC485139	485139	transcript	XM_022407536.1	protein_coding	1	c.-187-481G>A
21	10215235	C	T	PASS	T	intron_variant	MODIFIER	LOC485139	485139	transcript	XM_005633371.3	protein_coding	2	c.65+3501G>A
21	10215235	C	T	PASS	T	intron_variant	MODIFIER	LOC485139	485139	transcript	XM_022407535.1	protein_coding	2	c.65+3501G>A
21	10215235	C	T	PASS	T	intron_variant	MODIFIER	LOC485139	485139	transcript	XM_542257.5	protein_coding	2	c.65+3501G>A
21	10221526	C	T	PASS	T	upstream_gene_variant	MODIFIER	LOC485139	485139	transcript	XM_005633370.3	protein_coding	-1	c.-2726G>A
21	10221526	C	T	PASS	T	upstream_gene_variant	MODIFIER	LOC485139	485139	transcript	XM_005633372.2	protein_coding	-1	c.-13483G>A
21	10221526	C	T	PASS	T	upstream_gene_variant	MODIFIER	LOC485139	485139	transcript	XM_022407536.1	protein_coding	-1	c.-12508G>A
21	10221526	C	T	PASS	T	upstream_gene_variant	MODIFIER	LOC485139	485139	transcript	XM_005633371.3	protein_coding	-1	c.-2726G>A
21	10221526	C	T	PASS	T	upstream_gene_variant	MODIFIER	LOC485139	485139	transcript	XM_022407535.1	protein_coding	-1	c.-2726G>A
21	10221526	C	T	PASS	T	intron_variant	MODIFIER	LOC485139	485139	transcript	XM_542257.5	protein_coding	1	c.-42+1128G>A
21	10237935	A	G	PASS	G	intergenic_region	MODIFIER	LOC485139-LOC485140	485139-485140	intergenic_region	485139-485140		-1	n.10237935A>G
21	10252992	G	T	PASS	T	intergenic_region	MODIFIER	LOC485139-LOC485140	485139-485140	intergenic_region	485139-485140		-1	n.10252992G>T
21	10265939	C	G	PASS	G	intergenic_region	MODIFIER	LOC485139-LOC485140	485139-485140	intergenic_region	485139-485140		-1	n.10265939C>G
21	10265962	T	G	PASS	G	intergenic_region	MODIFIER	LOC485139-LOC485140	485139-485140	intergenic_region	485139-485140		-1	n.10265962T>G
21	10268277	T	C	PASS	C	upstream_gene_variant	MODIFIER	LOC485140	485140	transcript	XM_022407540.1	protein_coding	-1	c.-5698T>C
21	10268277	T	C	PASS	C	intergenic_region	MODIFIER	LOC485139-LOC485140	485139-485140	intergenic_region	485139-485140		-1	n.10268277T>C
21	10272262	T	C	PASS	C	upstream_gene_variant	MODIFIER	LOC485140	485140	transcript	XM_022407540.1	protein_coding	-1	c.-1713T>C
21	10272262	T	C	PASS	C	intergenic_region	MODIFIER	LOC485139-LOC485140	485139-485140	intergenic_region	485139-485140		-1	n.10272262T>C
21	20653621	C	T	PASS	T	intron_variant	MODIFIER	USP35	485168	transcript	XM_022407615.1	protein_coding	2	c.673+152G>A
21	20653621	C	T	PASS	T	intron_variant	MODIFIER	USP35	485168	transcript	XM_542286.6	protein_coding	2	c.673+152G>A
21	22857688	C	T	PASS	T	intergenic_region	MODIFIER	DGAT2-MOGAT2	485185-485186	intergenic_region	485185-485186		-1	n.22857688C>T
21	33504142	T	G	PASS	G	upstream_gene_variant	MODIFIER	LOC106560154	106560154	transcript	106560154	pseudogene	-1	n.-1984T>G
21	33504142	T	G	PASS	G	intergenic_region	MODIFIER	ADM-LOC106560154	403817-106560154	intergenic_region	403817-106560154		-1	n.33504142T>G
21	35753048	G	C	PASS	C	intron_variant	MODIFIER	TEAD1	610713	transcript	XM_005633681.3	protein_coding	1	c.-99-1302G>C
21	35753048	G	C	PASS	C	intron_variant	MODIFIER	TEAD1	610713	transcript	XM_005633682.3	protein_coding	1	c.-99-1302G>C
21	35753048	G	C	PASS	C	intron_variant	MODIFIER	TEAD1	610713	transcript	XM_014122601.2	protein_coding	1	c.-99-1302G>C
21	35753048	G	C	PASS	C	intron_variant	MODIFIER	TEAD1	610713	transcript	XM_014122602.2	protein_coding	1	c.-99-1302G>C
21	35753048	G	C	PASS	C	intron_variant	MODIFIER	TEAD1	610713	transcript	XM_014122603.2	protein_coding	1	c.-99-1302G>C
21	35753048	G	C	PASS	C	intron_variant	MODIFIER	TEAD1	610713	transcript	XM_014122604.2	protein_coding	1	c.-99-1302G>C
21	39922678	A	T	PASS	T	downstream_gene_variant	MODIFIER	NUCB2	476876	transcript	XM_022407896.1	protein_coding	-1	c.*4126A>T
21	39922678	A	T	PASS	T	downstream_gene_variant	MODIFIER	NUCB2	476876	transcript	XM_022407898.1	protein_coding	-1	c.*4520A>T
21	39922678	A	T	PASS	T	downstream_gene_variant	MODIFIER	NUCB2	476876	transcript	XM_022407900.1	protein_coding	-1	c.*4520A>T
21	39922678	A	T	PASS	T	downstream_gene_variant	MODIFIER	NUCB2	476876	transcript	XM_022407897.1	protein_coding	-1	c.*4094A>T
21	39922678	A	T	PASS	T	downstream_gene_variant	MODIFIER	NUCB2	476876	transcript	XM_022407899.1	protein_coding	-1	c.*4126A>T
21	39922678	A	T	PASS	T	intergenic_region	MODIFIER	NUCB2-NCR3LG1	476876-102154898	intergenic_region	476876-102154898		-1	n.39922678A>T
21	41502411	G	A	PASS	A	intron_variant	MODIFIER	NAV2	485411	transcript	XM_014122561.2	protein_coding	1	c.75+43353G>A
21	42907038	ATACAGCATGT	A	PASS	A	intron_variant	MODIFIER	NELL1	476888	transcript	XM_022407972.1	protein_coding	14	c.1780+39064_1780+39073delTACAGCATGT
21	43183068	C	T	PASS	T	intron_variant	MODIFIER	NELL1	476888	transcript	XM_022407972.1	protein_coding	16	c.2029+39477C>T
21	43966786	C	CT	PASS	CT	intron_variant	MODIFIER	ANO5	485416	transcript	XM_014122435.2	protein_coding	14	c.1649-608_1649-607insT
21	43966786	C	CT	PASS	CT	intron_variant	MODIFIER	ANO5	485416	transcript	XM_005633297.3	protein_coding	14	c.1553-608_1553-607insT
21	43966786	C	CT	PASS	CT	intron_variant	MODIFIER	ANO5	485416	transcript	XM_005633298.3	protein_coding	13	c.1511-608_1511-607insT
21	43966786	C	CT	PASS	CT	intron_variant	MODIFIER	ANO5	485416	transcript	XM_005633299.3	protein_coding	13	c.1508-608_1508-607insT
21	43966786	C	CT	PASS	CT	intron_variant	MODIFIER	ANO5	485416	transcript	XM_014122436.2	protein_coding	14	c.1550-608_1550-607insT
21	43966786	C	CT	PASS	CT	intron_variant	MODIFIER	ANO5	485416	transcript	NM_001168413.1	protein_coding	14	c.1646-608_1646-607insT
21	43966860	AAT	A	PASS	A	intron_variant	MODIFIER	ANO5	485416	transcript	XM_014122435.2	protein_coding	14	c.1649-533_1649-532delAT
21	43966860	AAT	A	PASS	A	intron_variant	MODIFIER	ANO5	485416	transcript	XM_005633297.3	protein_coding	14	c.1553-533_1553-532delAT
21	43966860	AAT	A	PASS	A	intron_variant	MODIFIER	ANO5	485416	transcript	XM_005633298.3	protein_coding	13	c.1511-533_1511-532delAT
21	43966860	AAT	A	PASS	A	intron_variant	MODIFIER	ANO5	485416	transcript	XM_005633299.3	protein_coding	13	c.1508-533_1508-532delAT
21	43966860	AAT	A	PASS	A	intron_variant	MODIFIER	ANO5	485416	transcript	XM_014122436.2	protein_coding	14	c.1550-533_1550-532delAT
21	43966860	AAT	A	PASS	A	intron_variant	MODIFIER	ANO5	485416	transcript	NM_001168413.1	protein_coding	14	c.1646-533_1646-532delAT
22	466206	C	G	PASS	G	intron_variant	MODIFIER	WDFY2	606922	transcript	XM_843402.3	protein_coding	3	c.662+857G>C
22	7824965	C	CATCAGAGAGAGAGA	PASS	CATCAGAGAGAGAGA	intron_variant	MODIFIER	DNAJC15	476930	transcript	XM_534131.6	protein_coding	1	c.105+539_105+540insTCTCTCTCTCTGAT
22	7824965	C	CATCAGAGAGAGAGA	PASS	CATCAGAGAGAGAGA	intron_variant	MODIFIER	DNAJC15	476930	transcript	XR_002617940.1	pseudogene	1	n.131+539_131+540insTCTCTCTCTCTGAT
22	7824972	C	G	PASS	G	intron_variant	MODIFIER	DNAJC15	476930	transcript	XM_534131.6	protein_coding	1	c.105+533G>C
22	7824972	C	G	PASS	G	intron_variant	MODIFIER	DNAJC15	476930	transcript	XR_002617940.1	pseudogene	1	n.131+533G>C
22	17024912	G	A	PASS	A	intron_variant	MODIFIER	LOC111091634	111091634	transcript	XR_002617486.1	pseudogene	2	n.155-14731G>A
22	17024912	G	A	PASS	A	intron_variant	MODIFIER	LOC111091634	111091634	transcript	XR_002617487.1	pseudogene	2	n.155-14731G>A
22	17024935	C	T	PASS	T	intron_variant	MODIFIER	LOC111091634	111091634	transcript	XR_002617486.1	pseudogene	2	n.155-14708C>T
22	17024935	C	T	PASS	T	intron_variant	MODIFIER	LOC111091634	111091634	transcript	XR_002617487.1	pseudogene	2	n.155-14708C>T
22	17025038	G	C	PASS	C	intron_variant	MODIFIER	LOC111091634	111091634	transcript	XR_002617486.1	pseudogene	2	n.155-14605G>C
22	17025038	G	C	PASS	C	intron_variant	MODIFIER	LOC111091634	111091634	transcript	XR_002617487.1	pseudogene	2	n.155-14605G>C
22	17025047	G	A	PASS	A	intron_variant	MODIFIER	LOC111091634	111091634	transcript	XR_002617486.1	pseudogene	2	n.155-14596G>A
22	17025047	G	A	PASS	A	intron_variant	MODIFIER	LOC111091634	111091634	transcript	XR_002617487.1	pseudogene	2	n.155-14596G>A
22	17025377	T	C	PASS	C	intron_variant	MODIFIER	LOC111091634	111091634	transcript	XR_002617486.1	pseudogene	2	n.155-14266T>C
22	17025377	T	C	PASS	C	intron_variant	MODIFIER	LOC111091634	111091634	transcript	XR_002617487.1	pseudogene	2	n.155-14266T>C
22	20168814	A	C	PASS	C	intergenic_region	MODIFIER	LOC111091756-LOC106557543	111091756-106557543	intergenic_region	111091756-106557543		-1	n.20168814A>C
22	20232889	G	T	PASS	T	intergenic_region	MODIFIER	LOC111091756-LOC106557543	111091756-106557543	intergenic_region	111091756-106557543		-1	n.20232889G>T
22	20239461	TTCTTA	T	PASS	T	intergenic_region	MODIFIER	LOC111091756-LOC106557543	111091756-106557543	intergenic_region	111091756-106557543		-1	n.20239462_20239466delTCTTA
22	20265412	G	C	PASS	C	intergenic_region	MODIFIER	LOC111091756-LOC106557543	111091756-106557543	intergenic_region	111091756-106557543		-1	n.20265412G>C
22	20274934	C	T	PASS	T	intergenic_region	MODIFIER	LOC111091756-LOC106557543	111091756-106557543	intergenic_region	111091756-106557543		-1	n.20274934C>T
22	20308460	C	T	PASS	T	intergenic_region	MODIFIER	LOC111091756-LOC106557543	111091756-106557543	intergenic_region	111091756-106557543		-1	n.20308460C>T
22	20316116	G	C	PASS	C	intergenic_region	MODIFIER	LOC111091756-LOC106557543	111091756-106557543	intergenic_region	111091756-106557543		-1	n.20316116G>C
22	20317187	C	T	PASS	T	intergenic_region	MODIFIER	LOC111091756-LOC106557543	111091756-106557543	intergenic_region	111091756-106557543		-1	n.20317187C>T
22	20317283	T	TAAAAAAATATA	PASS	TAAAAAAATATA	intergenic_region	MODIFIER	LOC111091756-LOC106557543	111091756-106557543	intergenic_region	111091756-106557543		-1	n.20317283_20317284insAAAAAAATATA
22	20317286	T	TAAGTAGCTAGCTGATCAACAATTTGCTTCTCTTCCAGGATTA	PASS	TAAGTAGCTAGCTGATCAACAATTTGCTTCTCTTCCAGGATTA	intergenic_region	MODIFIER	LOC111091756-LOC106557543	111091756-106557543	intergenic_region	111091756-106557543		-1	n.20317286_20317287insAAGTAGCTAGCTGATCAACAATTTGCTTCTCTTCCAGGATTA
22	20349052	T	C	PASS	C	intergenic_region	MODIFIER	LOC111091756-LOC106557543	111091756-106557543	intergenic_region	111091756-106557543		-1	n.20349052T>C
22	20419648	C	T	PASS	T	intergenic_region	MODIFIER	LOC111091756-LOC106557543	111091756-106557543	intergenic_region	111091756-106557543		-1	n.20419648C>T
22	20420225	G	A	PASS	A	intergenic_region	MODIFIER	LOC111091756-LOC106557543	111091756-106557543	intergenic_region	111091756-106557543		-1	n.20420225G>A
22	20438543	ACACAGGCAGAGG	A	PASS	A	intergenic_region	MODIFIER	LOC111091756-LOC106557543	111091756-106557543	intergenic_region	111091756-106557543		-1	n.20438544_20438555delCACAGGCAGAGG
22	20441916	G	A	PASS	A	intergenic_region	MODIFIER	LOC111091756-LOC106557543	111091756-106557543	intergenic_region	111091756-106557543		-1	n.20441916G>A
22	20534142	G	T	PASS	T	intergenic_region	MODIFIER	LOC111091756-LOC106557543	111091756-106557543	intergenic_region	111091756-106557543		-1	n.20534142G>T
22	20534161	A	C	PASS	C	intergenic_region	MODIFIER	LOC111091756-LOC106557543	111091756-106557543	intergenic_region	111091756-106557543		-1	n.20534161A>C
22	20534200	T	C	PASS	C	intergenic_region	MODIFIER	LOC111091756-LOC106557543	111091756-106557543	intergenic_region	111091756-106557543		-1	n.20534200T>C
22	20792585	G	A	PASS	A	downstream_gene_variant	MODIFIER	LOC111091781	111091781	transcript	XR_002617798.1	pseudogene	-1	n.*3152C>T
22	20792585	G	A	PASS	A	intergenic_region	MODIFIER	LOC106557543-LOC111091781	106557543-111091781	intergenic_region	106557543-111091781		-1	n.20792585G>A
22	20813212	CT	C	PASS	C	downstream_gene_variant	MODIFIER	LOC111091776	111091776	transcript	XR_002617793.1	pseudogene	-1	n.*1628delT
22	20813212	CT	C	PASS	C	intergenic_region	MODIFIER	LOC111091776-LOC100688119	111091776-100688119	intergenic_region	111091776-100688119		-1	n.20813213delT
22	20821763	C	T	PASS	T	intergenic_region	MODIFIER	LOC111091776-LOC100688119	111091776-100688119	intergenic_region	111091776-100688119		-1	n.20821763C>T
22	20840408	G	A	PASS	A	intergenic_region	MODIFIER	LOC100688119-LOC111091750	100688119-111091750	intergenic_region	100688119-111091750		-1	n.20840408G>A
22	20914900	TATATATATATATATATAGAG	T	PASS	T	intergenic_region	MODIFIER	LOC100688119-LOC111091750	100688119-111091750	intergenic_region	100688119-111091750		-1	n.20914901_20914920delATATATATATATATATAGAG
22	20922700	TAAAGTGAC	T	PASS	T	intergenic_region	MODIFIER	LOC100688119-LOC111091750	100688119-111091750	intergenic_region	100688119-111091750		-1	n.20922701_20922708delAAAGTGAC
22	22361153	TGCACA	T	PASS	T	intergenic_region	MODIFIER	LOC111091645-LOC485484	111091645-485484	intergenic_region	111091645-485484		-1	n.22361154_22361158delGCACA
22	23153377	G	A	PASS	A	intron_variant	MODIFIER	LOC106557553	106557553	transcript	XM_022408217.1	protein_coding	2	c.538-33378G>A
22	23278973	T	G	PASS	G	intergenic_region	MODIFIER	LOC106557553-LOC100688471	106557553-100688471	intergenic_region	106557553-100688471		-1	n.23278973T>G
22	24832025	G	C	PASS	C	intergenic_region	MODIFIER	LOC111091735-LOC106557564	111091735-106557564	intergenic_region	111091735-106557564		-1	n.24832025G>C
22	26879258	CCCCCG	C	PASS	C	upstream_gene_variant	MODIFIER	BORA	476944	transcript	XM_014106331.2	protein_coding	-1	c.-2207_-2203delCCCCG
22	26879258	CCCCCG	C	PASS	C	intron_variant	MODIFIER	MZT1	100683696	transcript	XM_003433054.5	protein_coding	1	c.76+738_76+742delCGGGG
22	26879258	CCCCCG	C	PASS	C	intron_variant	MODIFIER	MZT1	100683696	transcript	XR_295204.3	pseudogene	1	n.213+738_213+742delCGGGG
22	27756633	C	T	PASS	T	intron_variant	MODIFIER	KLF12	485493	transcript	XM_005633968.3	protein_coding	6	c.869+8268G>A
22	27756633	C	T	PASS	T	intron_variant	MODIFIER	KLF12	485493	transcript	XM_005633969.3	protein_coding	6	c.719+8268G>A
22	27756633	C	T	PASS	T	intron_variant	MODIFIER	KLF12	485493	transcript	XM_022408023.1	protein_coding	5	c.719+8268G>A
22	27756633	C	T	PASS	T	intron_variant	MODIFIER	KLF12	485493	transcript	XM_014106334.2	protein_coding	6	c.869+8268G>A
22	27756633	C	T	PASS	T	intron_variant	MODIFIER	KLF12	485493	transcript	XM_022408022.1	protein_coding	8	c.719+8268G>A
22	27756633	C	T	PASS	T	intron_variant	MODIFIER	KLF12	485493	transcript	XM_014106337.2	protein_coding	7	c.719+8268G>A
22	27756633	C	T	PASS	T	intron_variant	MODIFIER	KLF12	485493	transcript	XM_014106335.2	protein_coding	8	c.869+8268G>A
22	29138886	C	T	PASS	T	intron_variant	MODIFIER	TBC1D4	485494	transcript	XM_022408024.1	protein_coding	11	c.1154+2692G>A
22	29138886	C	T	PASS	T	intron_variant	MODIFIER	TBC1D4	485494	transcript	XM_022408025.1	protein_coding	11	c.1154+2692G>A
22	29138886	C	T	PASS	T	intron_variant	MODIFIER	TBC1D4	485494	transcript	XM_022408026.1	protein_coding	10	c.989+2692G>A
22	29138886	C	T	PASS	T	intron_variant	MODIFIER	TBC1D4	485494	transcript	XM_022408027.1	protein_coding	9	c.966-3400G>A
22	29138886	C	T	PASS	T	intron_variant	MODIFIER	TBC1D4	485494	transcript	XR_002617543.1	pseudogene	11	n.1301+2692G>A
22	29138886	C	T	PASS	T	intron_variant	MODIFIER	TBC1D4	485494	transcript	XR_002617542.1	pseudogene	11	n.1301+2692G>A
22	29138886	C	T	PASS	T	intron_variant	MODIFIER	TBC1D4	485494	transcript	XM_022408028.1	protein_coding	11	c.1154+2692G>A
22	29652415	C	CTTTTCTTCTTTCTTTCTTTCTT	PASS	CTTTTCTTCTTTCTTTCTTTCTT	intergenic_region	MODIFIER	LMO7-LOC111091800	476948-111091800	intergenic_region	476948-111091800		-1	n.29652415_29652416insTTTTCTTCTTTCTTTCTTTCTT
22	34126287	CG	C	PASS	C	downstream_gene_variant	MODIFIER	LOC111091755	111091755	transcript	XR_002617763.1	pseudogene	-1	n.*346delG
22	34126287	CG	C	PASS	C	intergenic_region	MODIFIER	LOC111091755-LOC111091669	111091755-111091669	intergenic_region	111091755-111091669		-1	n.34126288delG
22	37492117	A	G	PASS	G	intergenic_region	MODIFIER	LOC100685150-SLITRK6	100685150-100856466	intergenic_region	100685150-100856466		-1	n.37492117A>G
22	42518799	C	T	PASS	T	intergenic_region	MODIFIER	LOC111091679-GPC5	111091679-485518	intergenic_region	111091679-485518		-1	n.42518799C>T
22	42570643	AAG	A	PASS	A	intron_variant	MODIFIER	GPC5	485518	transcript	XM_542637.6	protein_coding	1	c.164-11472_164-11471delAG
22	42570643	AAG	A	PASS	A	intron_variant	MODIFIER	GPC5	485518	transcript	XM_022408093.1	protein_coding	1	c.164-11472_164-11471delAG
22	42570643	AAG	A	PASS	A	intron_variant	MODIFIER	GPC5	485518	transcript	XR_002617593.1	pseudogene	1	n.520-11472_520-11471delAG
22	42570643	AAG	A	PASS	A	intron_variant	MODIFIER	GPC5	485518	transcript	XM_022408092.1	protein_coding	1	c.164-11472_164-11471delAG
22	42587370	C	T	PASS	T	intron_variant	MODIFIER	GPC5	485518	transcript	XM_542637.6	protein_coding	2	c.325+5093C>T
22	42587370	C	T	PASS	T	intron_variant	MODIFIER	GPC5	485518	transcript	XM_022408093.1	protein_coding	2	c.325+5093C>T
22	42587370	C	T	PASS	T	intron_variant	MODIFIER	GPC5	485518	transcript	XR_002617593.1	pseudogene	2	n.681+5093C>T
22	42587370	C	T	PASS	T	intron_variant	MODIFIER	GPC5	485518	transcript	XM_022408092.1	protein_coding	2	c.325+5093C>T
22	43107052	C	CATATATATATATATAT	PASS	CATATATATATATATAT	intron_variant	MODIFIER	GPC5	485518	transcript	XM_542637.6	protein_coding	6	c.1402-88138_1402-88137insATATATATATATATAT
22	43107052	C	CATATATATATATATAT	PASS	CATATATATATATATAT	intron_variant	MODIFIER	GPC5	485518	transcript	XM_022408092.1	protein_coding	6	c.1402-32996_1402-32995insATATATATATATATAT
22	43912852	A	G	PASS	G	intergenic_region	MODIFIER	GPC5-GPC6	485518-476962	intergenic_region	485518-476962		-1	n.43912852A>G
22	44234255	T	C	PASS	C	intron_variant	MODIFIER	GPC6	476962	transcript	XM_005634018.2	protein_coding	1	c.160+79152T>C
22	44234255	T	C	PASS	C	intron_variant	MODIFIER	GPC6	476962	transcript	XM_534162.5	protein_coding	1	c.160+79152T>C
22	44620165	C	A	PASS	A	intron_variant	MODIFIER	GPC6	476962	transcript	XM_005634018.2	protein_coding	2	c.320-81295C>A
22	44620165	C	A	PASS	A	intron_variant	MODIFIER	GPC6	476962	transcript	XM_534162.5	protein_coding	2	c.320-81295C>A
22	45086986	C	T	PASS	T	intron_variant	MODIFIER	GPC6	476962	transcript	XM_005634018.2	protein_coding	4	c.878-44999C>T
22	45086986	C	T	PASS	T	intron_variant	MODIFIER	GPC6	476962	transcript	XM_534162.5	protein_coding	4	c.878-44999C>T
22	45154426	CTCTT	C	PASS	C	intron_variant	MODIFIER	GPC6	476962	transcript	XM_005634018.2	protein_coding	6	c.1153-42_1153-39delTCTT
22	45154426	CTCTT	C	PASS	C	intron_variant	MODIFIER	GPC6	476962	transcript	XM_534162.5	protein_coding	6	c.1152+4132_1152+4135delTCTT
22	46459632	A	G	PASS	G	intron_variant	MODIFIER	UGGT2	485525	transcript	XM_022408094.1	protein_coding	23	c.2751-1664T>C
22	46459632	A	G	PASS	G	intron_variant	MODIFIER	UGGT2	485525	transcript	XM_022408095.1	protein_coding	17	c.1857-1664T>C
22	46459632	A	G	PASS	G	intron_variant	MODIFIER	UGGT2	485525	transcript	XM_005634020.3	protein_coding	23	c.2592-1664T>C
22	47435922	C	T	PASS	T	intergenic_region	MODIFIER	OXGR1-MBNL2	485527-612815	intergenic_region	485527-612815		-1	n.47435922C>T
22	50528897	G	A	PASS	A	intron_variant	MODIFIER	TMTC4	100855496	transcript	XM_005634057.3	protein_coding	5	c.730+8261C>T
22	50528897	G	A	PASS	A	intron_variant	MODIFIER	TMTC4	100855496	transcript	XM_005634058.3	protein_coding	5	c.730+8261C>T
22	50528897	G	A	PASS	A	intron_variant	MODIFIER	TMTC4	100855496	transcript	XM_005634059.3	protein_coding	5	c.730+8261C>T
22	50528897	G	A	PASS	A	intron_variant	MODIFIER	TMTC4	100855496	transcript	XM_022408129.1	protein_coding	5	c.730+8261C>T
22	50528897	G	A	PASS	A	intron_variant	MODIFIER	TMTC4	100855496	transcript	XM_014106381.2	protein_coding	5	c.730+8261C>T
22	54437189	G	A	PASS	A	intergenic_region	MODIFIER	LOC102153016-LOC111091823	102153016-111091823	intergenic_region	102153016-111091823		-1	n.54437189G>A
22	54893797	G	A	PASS	A	intergenic_region	MODIFIER	LOC111091642-LOC100683697	111091642-100683697	intergenic_region	111091642-100683697		-1	n.54893797G>A
22	57647355	G	C	PASS	C	missense_variant	MODERATE	MYO16	485546	transcript	XM_022408225.1	protein_coding	24	c.2824G>C	p.Glu942Gln
22	58874587	G	A	PASS	A	downstream_gene_variant	MODIFIER	LOC111091715	111091715	transcript	XR_002617686.1	pseudogene	-1	n.*2337G>A
22	58874587	G	A	PASS	A	downstream_gene_variant	MODIFIER	LOC111091717	111091717	transcript	XR_002617688.1	pseudogene	-1	n.*4732C>T
22	58874587	G	A	PASS	A	downstream_gene_variant	MODIFIER	LOC111091715	111091715	transcript	XR_002617685.1	pseudogene	-1	n.*2683G>A
22	58874587	G	A	PASS	A	intergenic_region	MODIFIER	LOC111091715-LOC111091717	111091715-111091717	intergenic_region	111091715-111091717		-1	n.58874587G>A
22	59062617	C	A	PASS	A	intron_variant	MODIFIER	ANKRD10	476986	transcript	XM_843234.5	protein_coding	5	c.787+1510G>T
22	61187721	G	A	PASS	A	intron_variant	MODIFIER	RASA3	476998	transcript	XM_005634138.3	protein_coding	1	c.55+14331C>T
23	9680128	G	A	PASS	A	intron_variant	MODIFIER	MYRIP	485603	transcript	XM_022408500.1	protein_coding	4	c.551-2702G>A
23	9680128	G	A	PASS	A	intron_variant	MODIFIER	MYRIP	485603	transcript	XM_022408501.1	protein_coding	4	c.551-2702G>A
23	9680128	G	A	PASS	A	intron_variant	MODIFIER	MYRIP	485603	transcript	XM_542722.6	protein_coding	4	c.551-2702G>A
23	10534485	C	G	PASS	G	downstream_gene_variant	MODIFIER	LOC106557639	106557639	transcript	XR_001314289.2	pseudogene	-1	n.*3159C>G
23	10534485	C	G	PASS	G	intergenic_region	MODIFIER	LOC106557639-CTNNB1	106557639-477032	intergenic_region	106557639-477032		-1	n.10534485C>G
23	10534486	A	G	PASS	G	downstream_gene_variant	MODIFIER	LOC106557639	106557639	transcript	XR_001314289.2	pseudogene	-1	n.*3160A>G
23	10534486	A	G	PASS	G	intergenic_region	MODIFIER	LOC106557639-CTNNB1	106557639-477032	intergenic_region	106557639-477032		-1	n.10534486A>G
23	13291760	CTTT	C	PASS	C	intergenic_region	MODIFIER	LOC111092024-LOC111091964	111092024-111091964	intergenic_region	111092024-111091964		-1	n.13291761_13291763delTTT
23	27965126	G	A	PASS	A	intron_variant	MODIFIER	PIK3R4	477064	transcript	XM_005634411.3	protein_coding	2	c.734-2247C>T
23	27965126	G	A	PASS	A	intron_variant	MODIFIER	PIK3R4	477064	transcript	XM_534260.6	protein_coding	2	c.734-2247C>T
23	29390196	TTTTA	T	PASS	T	intron_variant	MODIFIER	DNAJC13	485663	transcript	XM_014106678.2	protein_coding	1	c.-14+825_-14+828delTTTA
23	29390196	TTTTA	T	PASS	T	intron_variant	MODIFIER	DNAJC13	485663	transcript	XM_022408637.1	protein_coding	2	c.-14+117_-14+120delTTTA
23	29390196	TTTTA	T	PASS	T	intron_variant	MODIFIER	DNAJC13	485663	transcript	XM_014106679.2	protein_coding	2	c.-14+127_-14+130delTTTA
23	29390196	TTTTA	T	PASS	T	intron_variant	MODIFIER	DNAJC13	485663	transcript	XM_014106681.2	protein_coding	2	c.-14+117_-14+120delTTTA
23	29390196	TTTTA	T	PASS	T	intron_variant	MODIFIER	DNAJC13	485663	transcript	XM_022408636.1	protein_coding	2	c.-14+23_-14+26delTTTA
23	29390196	TTTTA	T	PASS	T	intron_variant	MODIFIER	DNAJC13	485663	transcript	XM_542783.6	protein_coding	2	c.-14+117_-14+120delTTTA
23	29390667	T	TAAAAA	PASS	TAAAAA	intron_variant	MODIFIER	DNAJC13	485663	transcript	XM_014106678.2	protein_coding	1	c.-14+1295_-14+1296insAAAAA
23	29390667	T	TAAAAA	PASS	TAAAAA	intron_variant	MODIFIER	DNAJC13	485663	transcript	XM_022408637.1	protein_coding	2	c.-14+587_-14+588insAAAAA
23	29390667	T	TAAAAA	PASS	TAAAAA	intron_variant	MODIFIER	DNAJC13	485663	transcript	XM_014106679.2	protein_coding	2	c.-14+597_-14+598insAAAAA
23	29390667	T	TAAAAA	PASS	TAAAAA	intron_variant	MODIFIER	DNAJC13	485663	transcript	XM_014106681.2	protein_coding	2	c.-14+587_-14+588insAAAAA
23	29390667	T	TAAAAA	PASS	TAAAAA	intron_variant	MODIFIER	DNAJC13	485663	transcript	XM_022408636.1	protein_coding	2	c.-14+493_-14+494insAAAAA
23	29390667	T	TAAAAA	PASS	TAAAAA	intron_variant	MODIFIER	DNAJC13	485663	transcript	XM_542783.6	protein_coding	2	c.-14+587_-14+588insAAAAA
23	29419089	C	CTCTTTGGTACTCTGTCAAATAAATAAAATCTTTTTTCTTTTTTCTTTTCTTTTTTTTTTTTTTTTAAGATTTATTTA	PASS	CTCTTTGGTACTCTGTCAAATAAATAAAATCTTTTTTCTTTTTTCTTTTCTTTTTTTTTTTTTTTTAAGATTTATTTA	intron_variant	MODIFIER	DNAJC13	485663	transcript	XM_014106678.2	protein_coding	2	c.69-4284_69-4283insTCTTTGGTACTCTGTCAAATAAATAAAATCTTTTTTCTTTTTTCTTTTCTTTTTTTTTTTTTTTTAAGATTTATTTA
23	29419089	C	CTCTTTGGTACTCTGTCAAATAAATAAAATCTTTTTTCTTTTTTCTTTTCTTTTTTTTTTTTTTTTAAGATTTATTTA	PASS	CTCTTTGGTACTCTGTCAAATAAATAAAATCTTTTTTCTTTTTTCTTTTCTTTTTTTTTTTTTTTTAAGATTTATTTA	intron_variant	MODIFIER	DNAJC13	485663	transcript	XM_022408637.1	protein_coding	3	c.69-4284_69-4283insTCTTTGGTACTCTGTCAAATAAATAAAATCTTTTTTCTTTTTTCTTTTCTTTTTTTTTTTTTTTTAAGATTTATTTA
23	29419089	C	CTCTTTGGTACTCTGTCAAATAAATAAAATCTTTTTTCTTTTTTCTTTTCTTTTTTTTTTTTTTTTAAGATTTATTTA	PASS	CTCTTTGGTACTCTGTCAAATAAATAAAATCTTTTTTCTTTTTTCTTTTCTTTTTTTTTTTTTTTTAAGATTTATTTA	intron_variant	MODIFIER	DNAJC13	485663	transcript	XM_014106679.2	protein_coding	3	c.69-4284_69-4283insTCTTTGGTACTCTGTCAAATAAATAAAATCTTTTTTCTTTTTTCTTTTCTTTTTTTTTTTTTTTTAAGATTTATTTA
23	29419089	C	CTCTTTGGTACTCTGTCAAATAAATAAAATCTTTTTTCTTTTTTCTTTTCTTTTTTTTTTTTTTTTAAGATTTATTTA	PASS	CTCTTTGGTACTCTGTCAAATAAATAAAATCTTTTTTCTTTTTTCTTTTCTTTTTTTTTTTTTTTTAAGATTTATTTA	intron_variant	MODIFIER	DNAJC13	485663	transcript	XM_014106681.2	protein_coding	3	c.69-4284_69-4283insTCTTTGGTACTCTGTCAAATAAATAAAATCTTTTTTCTTTTTTCTTTTCTTTTTTTTTTTTTTTTAAGATTTATTTA
23	29419089	C	CTCTTTGGTACTCTGTCAAATAAATAAAATCTTTTTTCTTTTTTCTTTTCTTTTTTTTTTTTTTTTAAGATTTATTTA	PASS	CTCTTTGGTACTCTGTCAAATAAATAAAATCTTTTTTCTTTTTTCTTTTCTTTTTTTTTTTTTTTTAAGATTTATTTA	intron_variant	MODIFIER	DNAJC13	485663	transcript	XM_022408636.1	protein_coding	3	c.69-4284_69-4283insTCTTTGGTACTCTGTCAAATAAATAAAATCTTTTTTCTTTTTTCTTTTCTTTTTTTTTTTTTTTTAAGATTTATTTA
23	29419089	C	CTCTTTGGTACTCTGTCAAATAAATAAAATCTTTTTTCTTTTTTCTTTTCTTTTTTTTTTTTTTTTAAGATTTATTTA	PASS	CTCTTTGGTACTCTGTCAAATAAATAAAATCTTTTTTCTTTTTTCTTTTCTTTTTTTTTTTTTTTTAAGATTTATTTA	intron_variant	MODIFIER	DNAJC13	485663	transcript	XM_542783.6	protein_coding	3	c.69-4284_69-4283insTCTTTGGTACTCTGTCAAATAAATAAAATCTTTTTTCTTTTTTCTTTTCTTTTTTTTTTTTTTTTAAGATTTATTTA
23	29439080	T	A	PASS	A	intron_variant	MODIFIER	DNAJC13	485663	transcript	XM_014106678.2	protein_coding	13	c.1450-360T>A
23	29439080	T	A	PASS	A	intron_variant	MODIFIER	DNAJC13	485663	transcript	XM_022408637.1	protein_coding	14	c.1450-360T>A
23	29439080	T	A	PASS	A	intron_variant	MODIFIER	DNAJC13	485663	transcript	XM_014106679.2	protein_coding	14	c.1450-360T>A
23	29439080	T	A	PASS	A	intron_variant	MODIFIER	DNAJC13	485663	transcript	XM_014106681.2	protein_coding	14	c.1450-360T>A
23	29439080	T	A	PASS	A	intron_variant	MODIFIER	DNAJC13	485663	transcript	XM_022408636.1	protein_coding	14	c.1450-360T>A
23	29439080	T	A	PASS	A	intron_variant	MODIFIER	DNAJC13	485663	transcript	XM_542783.6	protein_coding	14	c.1450-360T>A
23	29439080	T	A	PASS	A	intron_variant	MODIFIER	DNAJC13	485663	transcript	XM_014106682.2	protein_coding	9	c.1138-360T>A
23	29479877	A	AG	PASS	AG	intron_variant	MODIFIER	DNAJC13	485663	transcript	XM_014106678.2	protein_coding	42	c.4899+852_4899+853insG
23	29479877	A	AG	PASS	AG	intron_variant	MODIFIER	DNAJC13	485663	transcript	XM_022408637.1	protein_coding	43	c.4899+852_4899+853insG
23	29479877	A	AG	PASS	AG	intron_variant	MODIFIER	DNAJC13	485663	transcript	XM_014106679.2	protein_coding	43	c.4899+852_4899+853insG
23	29479877	A	AG	PASS	AG	intron_variant	MODIFIER	DNAJC13	485663	transcript	XM_014106681.2	protein_coding	43	c.4899+852_4899+853insG
23	29479877	A	AG	PASS	AG	intron_variant	MODIFIER	DNAJC13	485663	transcript	XM_022408636.1	protein_coding	43	c.4899+852_4899+853insG
23	29479877	A	AG	PASS	AG	intron_variant	MODIFIER	DNAJC13	485663	transcript	XM_542783.6	protein_coding	42	c.4884+852_4884+853insG
23	29479877	A	AG	PASS	AG	intron_variant	MODIFIER	DNAJC13	485663	transcript	XM_014106682.2	protein_coding	38	c.4587+852_4587+853insG
23	29562424	A	AC	PASS	AC	intron_variant	MODIFIER	ACAD11	100856488	transcript	XM_003639824.4	protein_coding	13	c.1625-2301_1625-2300insG
23	29562424	A	AC	PASS	AC	intron_variant	MODIFIER	ACAD11	100856488	transcript	XM_005634426.3	protein_coding	13	c.1268-2301_1268-2300insG
23	29563246	AG	A	PASS	A	intron_variant	MODIFIER	ACAD11	100856488	transcript	XM_003639824.4	protein_coding	13	c.1625-3123delC
23	29563246	AG	A	PASS	A	intron_variant	MODIFIER	ACAD11	100856488	transcript	XM_005634426.3	protein_coding	13	c.1268-3123delC
23	29620772	AAAG	A	PASS	A	intron_variant	MODIFIER	ACAD11	100856488	transcript	XM_003639824.4	protein_coding	5	c.703-1168_703-1166delCTT
23	29620772	AAAG	A	PASS	A	intron_variant	MODIFIER	ACAD11	100856488	transcript	XM_005634426.3	protein_coding	5	c.346-1168_346-1166delCTT
23	30494070	C	T	PASS	T	upstream_gene_variant	MODIFIER	LOC100685681	100685681	transcript	100685681	pseudogene	-1	n.-2453C>T
23	30494070	C	T	PASS	T	intergenic_region	MODIFIER	CDV3-LOC100685681	100685602-100685681	intergenic_region	100685602-100685681		-1	n.30494070C>T
23	30983411	C	T	PASS	T	intron_variant	MODIFIER	RYK	477074	transcript	XM_014106740.1	protein_coding	13	c.1392+1202G>A
23	30983411	C	T	PASS	T	intron_variant	MODIFIER	RYK	477074	transcript	XM_005634452.3	protein_coding	13	c.1383+1202G>A
23	30983411	C	T	PASS	T	intron_variant	MODIFIER	RYK	477074	transcript	XM_022408656.1	protein_coding	13	c.1383+1202G>A
23	31245341	C	T	PASS	T	upstream_gene_variant	MODIFIER	CEP63	477075	transcript	XM_005634454.3	protein_coding	-1	c.-4332C>T
23	31245341	C	T	PASS	T	upstream_gene_variant	MODIFIER	CEP63	477075	transcript	XM_005634455.2	protein_coding	-1	c.-13732C>T
23	31245341	C	T	PASS	T	upstream_gene_variant	MODIFIER	CEP63	477075	transcript	XM_534270.5	protein_coding	-1	c.-13732C>T
23	31245341	C	T	PASS	T	upstream_gene_variant	MODIFIER	CEP63	477075	transcript	XM_014106723.2	protein_coding	-1	c.-4332C>T
23	31245341	C	T	PASS	T	upstream_gene_variant	MODIFIER	CEP63	477075	transcript	XM_022408657.1	protein_coding	-1	c.-4332C>T
23	31245341	C	T	PASS	T	upstream_gene_variant	MODIFIER	CEP63	477075	transcript	XM_003433142.4	protein_coding	-1	c.-4332C>T
23	31245341	C	T	PASS	T	upstream_gene_variant	MODIFIER	CEP63	477075	transcript	XM_005634457.2	protein_coding	-1	c.-13732C>T
23	31245341	C	T	PASS	T	upstream_gene_variant	MODIFIER	CEP63	477075	transcript	XM_005634456.3	protein_coding	-1	c.-13732C>T
[truncated: 3,159 more rows]
