# Supplementary material for: PRKG2 Splice Site Variant in Dogo Argentino Dogs with Disproportionate Dwarfism
Source: Genes (Basel). 2021 Sep 24;12(10):1489. doi: 10.3390/genes12101489 (PMC8535654; doi:10.3390/genes12101489)
Supplement: Supplementary file 1 [file genes-12-01489-s001.zip › Table_S3_Public_Genomes.xlsx]

## Sheet: Sheet1
Table S3. Accession numbers of 787 dog and 9 wolf genome sequences. The affected Dogo Argentino dog is highlighted in red. The other 795 genome sequences were used as controls in variant filtering.
Sample ID	Breed	Study Accession	Sample Accession	Remark
20191520	Brandlbracke	PRJEB16012	SAMEA6862978
12559RE	Cane corso	PRJEB30571	SAMEA5205212
12675RE	Border Collie	PRJEB30571	SAMEA5205221
2M2	Beagle (research colony)	PRJEB16012	SAMEA5204132
3M2	Beagle (research colony)	PRJEB16012	SAMEA5204133
6455RE	Greater Swiss Mountain Dog	PRJEB16012 / PRJEB30571	SAMEA104658568 / SAMEA5205217
6958RE	Border Collie	PRJEB30571	SAMEA5205222
6F4	Beagle (research colony)	PRJEB16012	SAMEA5204134
7F1	Beagle (research colony)	PRJEB16012	SAMEA5204135
AC023	Australian Cattle Dog	PRJEB16012	SAMEA104091560
AC0258	Australian Cattle Dog	PRJEB16012	SAMEA5657396
AC046	Australian Cattle Dog	PRJEB16012	SAMEA104283464
AC065	Australian Cattle dog	PRJEB13468	SAMEA3928139
AC108	Australian Cattle dog	PRJEB16012	SAMEA4504820
AC144	Australian Cattle dog	PRJEB16012	SAMEA8797072
AC160	Australian Cattle dog	PRJEB16012	SAMEA7198609
AC364	Australian Cattle Dog	PRJEB16012	SAMEA104500413
AC483	Australian Cattle Dog	PRJEB16012	SAMEA8157152
AC530	Australian Cattle dog	PRJEB16012	SAMEA7198606
ACS082	American Cocker Spaniel	PRJEB16012	SAMEA6862930
ACS100	American Cocker Spaniel	PRJEB16012	SAMEA6862931
ACS176	American Cocker Spaniel	PRJEB16012	SAMEA6862932
ACS222	American Cocker Spaniel	PRJEB16012	SAMEA6862933
ACS230	American Cocker Spaniel	PRJEB16012	SAMEA6862934
ACS231	American Cocker Spaniel	PRJEB16012	SAMEA6862935
ACS302	American Cocker Spaniel	PRJEB16012	SAMEA6862936
ACS322	American Cocker Spaniel	PRJEB16012	SAMEA6862937
AD009	Alpine Dachsbracke	PRJEB14840	SAMEA4346711
AD034	Alpine Dachsbracke	PRJEB16012	SAMEA4848713
AM007	Alaskan Malamute	PRJEB16012	SAMEA104091571
AM019	Alaskan Malamute	PRJEB16012	SAMEA4848707
AR001	Australian Terrier	PRJEB16012	SAMEA4504840
AS006	American Staffordshire Terrier	PRJEB16012	SAMEA4504831
AS008	American Staffordshire Terrier	PRJEB16012	SAMEA4867927
AS011	American Staffordshire Terrier	PRJEB16012	SAMEA6249480
AU178	Australian Shepherd	PRJEB16012	SAMEA104283461
AU184	Australian Shepherd	PRJEB16012	SAMEA4867934
AU190	Australian Shepherd	PRJEB16012	SAMEA6862957
AU193	Australian Shepherd	PRJEB16012	SAMEA6862979
AU247	Australian Shepherd	PRJEB16012	SAMEA6862929
AU254	Australian Shepherd	PRJEB16012	SAMEA6862980
BB011	White Shepherd	PRJEB16012	SAMEA4506887
BC0480	Border Collie	PRJEB16012	SAMEA104091558
BC1028	Border Collie	PRJNA319610	SRR3466766
BC1029	Border Collie	PRJNA319610	SRR3466767
BC1893	Bearded Collie	PRJEB28877	SAMEA4949388
BC1895	Bearded Collie	PRJEB28877	SAMEA4949389
BC1896	Bearded Collie	PRJEB28877	SAMEA4949390
BC222	Border Collie	PRJNA319610	SRR3466763
BC272	Border Collie	PRJEB4544 / PRJNA188158	SAMEA2177732 / SAMN01908107
BC273	Border Collie	PRJEB16012	SAMEA4505490
BC387	Border Collie	PRJNA319610	SRR3466764
BC485	Border Collie	PRJEB16012	SAMEA104125112
BC518	Border Collie	PRJEB16012	SAMEA104125113
BC547	Border Collie	PRJEB30571	SAMEA5205229
BC548	Border Collie	PRJEB30571	SAMEA5205228
BC549	Border Collie	PRJEB30571	SAMEA5205227
BC555	Border Collie	PRJEB16012	SAMEA104125114
BC578	Border Collie	PRJNA319610	SRR3466765
BC597	Border Collie	PRJEB16012	SAMEA104125115
BC604__BC_24093	Border Collie	PRJEB12337	ERR1210832
BC621	Border Collie	PRJEB16012	SAMEA4867922
BC655	Border Collie	PRJEB16012	SAMEA5657397
BD016	Bearded Collie	PRJEB13468	SAMEA3928140
BD036	Bearded Collie	PRJEB16012	SAMEA4505492
BD052	Bearded Collie	PRJEB16012	SAMEA4504824
BD085	Bearded Collie	PRJEB16012	SAMEA4505493
BD089	Bearded Collie	PRJEB16012	SAMEA4504827
BD091	Bearded Collie	PRJEB16012	SAMEA4505496
BD093	Bearded Collie	PRJEB16012	SAMEA4504832
BD098	Bearded Collie	PRJEB16012	SAMEA4504839
BE020	Beagle (contamination mit Westie CMO allele)	PRJEB5500	SAMEA2376414
BF003	Beauceron	PRJEB16012	SAMEA6862928
BF21	Bichon Frisé	PRJEB16012	SAMEA5059512
BF39	Bichon Frisé	PRJEB16012	SAMEA5059513
BG064	Bavarian Hound (Bayerischer Gebirgsschweisshund)	PRJEB16012	SAMEA104091562
BH003	Basset Hound	PRJEB16012	SAMEA4509488
BH005	Basset Hound	PRJEB16012	SAMEA5209170
BH010	Basset Hound	PRJEB16012	SAMEA6862953
BH013	Basset Hound	PRJEB16012	SAMEA6862982
BH014	Basset Hound	PRJEB16012	SAMEA6862983
BH015	Basset Hound	PRJEB16012	SAMEA6862984
BH016	Basset Hound	PRJEB16012	SAMEA6862985
BI005	Brussels Griffon	PRJEB16012	SAMEA5209171
BI006	Brussels Griffon	PRJEB16012	SAMEA5209172
BJ001	Basenji	PRJEB16012	SAMEA104283473
BJ002	Basenji	PRJEB16012	SAMEA104283472
BJ003	Basenji	PRJEB16012	SAMEA104283471
BJ004	Basenji	PRJEB16012	SAMEA104283470
BJ005	Basenji	PRJEB16012	SAMEA104283469
BJ006	Basenji	PRJEB16012	SAMEA104283468
BS2168	Bernese Mountain Dog	PRJEB16012	SAMEA6249477
BS2556	Bernese Mountain Dog	PRJEB16012	SAMEA6862922
BS2557	Bernese Mountain Dog	PRJEB16012	SAMEA6862923
BS2558	Bernese Mountain Dog	PRJEB16012	SAMEA6862924
BS2559	Bernese Mountain Dog	PRJEB16012	SAMEA6862925
BS2560	Bernese Mountain Dog	PRJEB16012	SAMEA6862926
BS2962	Bernese Mountain Dog	PRJEB16012	SAMEA8157153
BS2963	Bernese Mountain Dog	PRJEB16012	SAMEA8157154
BS2964	Bernese Mountain Dog	PRJEB16012	SAMEA8157155
BS2965	Bernese Mountain Dog	PRJEB16012	SAMEA8157156
BS2966	Bernese Mountain Dog	PRJEB16012	SAMEA8157157
BS2967	Bernese Mountain Dog	PRJEB16012	SAMEA8157158
BS2968	Bernese Mountain Dog	PRJEB16012	SAMEA8157159
BS2969	Bernese Mountain Dog	PRJEB16012	SAMEA8157160
BS2970	Bernese Mountain Dog	PRJEB16012	SAMEA8157161
BS2971	Bernese Mountain Dog	PRJEB16012	SAMEA8157162
BT001	Miniature Bull terrier	PRJEB16012	SAMEA6862958
BT002	Bull Terrier	PRJEB16012	SAMEA6862976
BT007	Miniature Bull terrier	PRJEB16012	SAMEA4506897
BT008	Miniature Bull terrier	PRJEB16012	SAMEA6862959
BT012	Bull Terrier	PRJEB16012	SAMEA104125116
BT134	Bull Terrier	PRJEB16012	SAMEA6249481
BU002	Bullmastiff	PRJEB16012	SAMEA103949042
BU034	Bullmastiff	PRJEB16012	SAMEA8157163
BX002	Dogue de Bordeaux	PRJEB30571	SAMEA5205223
BX003	Dogue de Bordeaux	PRJEB30571	SAMEA5205224
BX004	Dogue de Bordeaux	PRJEB16012	SAMEA6862916
BX005	Dogue de Bordeaux	PRJEB16012	SAMEA6862917
BX006	Dogue de Bordeaux	PRJEB16012	SAMEA6862919
BX007	Dogue de Bordeaux	PRJEB16012	SAMEA6862920
BX008	Dogue de Bordeaux	PRJEB16012	SAMEA6862921
BY010	Berger des Pyrénées	PRJEB16012	SAMEA6249482
BY014	Berger des Pyrénées	PRJEB16012	SAMEA6249483
BY015	Berger des Pyrénées	PRJEB16012	SAMEA6249484
CE073	Cairn Terrier	PRJEB16012	SAMEA104091555
CH019	Chihuahua (without pedigree)	PRJEB13139	SAMEA3905753
CH022	Chihuahua Smooth Coat	PRJEB16012	SAMEA5209173
CH023	Chihuahua Smooth Coat	PRJEB16012	SAMEA5209174
CH027	Chihuahua	PRJEB16012	SAMEA4848714
CH030	Chihuahua	PRJEB16012	SAMEA6249485
CH032	Chihuahua	PRJEB16012	SAMEA8797073
CI001	Cane corso	PRJEB30571	SAMEA5205213
CI002	Cane corso	PRJEB30571	SAMEA5205214
CI003	Cane corso	PRJEB30571	SAMEA5205215
CI004	Cane corso	PRJEB30571	SAMEA5205216
CI005	Cane Corso	PRJEB16012	SAMEA6249478
CI009	Cane Corso Italiano	PRJEB16012	SAMEA8157164
CK006	Cavalier King Charles Spaniel	PRJEB16012	SAMEA104091570
CK023	Cavalier King Charles Spaniel	PRJEB16012	SAMEA104091569
CL013	Collie	PRJEB16012	SAMEA4867926
CP003	Cocker Spaniel	PRJEB16012	SAMEA4506900
CP010	English Cocker Spaniel	PRJEB16012	SAMEA5209204
CR018	Curly Coated Retriever	PRJEB16012	SAMEA4867931
CR023	Curly Coated Retriever	PRJEB16012	SAMEA4867930
CR039	Curly Coated Retriever	PRJEB16012	SAMEA104091556
CR040	Curly Coated Retriever	PRJEB16012	SAMEA4848709
CR101	Curly Coated Retriever	PRJEB16012	SAMEA4848710
CW011	Chow Chow	PRJEB16012	SAMEA104091566
DAL162K1	Dalmatian dog	PRJNA360671	SRR5161902
DB149	Boxer	PRJEB16012	SAMEA8157165
DD116	Great Dane	PRJEB16012	SAMEA104091557
DD304	Great Dane	PRJEB16012	SAMEA8157166
DG0003	Dogo Argentino	PRJEB16012	SAMEA8157167	affected by disproportionate dwarfism
DH0117	Dachshund	PRJEB16012	SAMEA104091567
DH098	Dachshund	PRJEB7736	SAMEA3121338
DH126	Dachshund	PRJEB16012	SAMEA104125117
DH136	Dachshund (Miniature Longhaired)	PRJEB16012	SAMEA5209175
DH137	Dachshund (Miniature Longhaired)	PRJEB16012	SAMEA5209176
DH159	Dachshund	PRJEB16012	SAMEA8157168
DK008	German Shorthaired Pointer	PRJEB16012	SAMEA5657398
DK398	German Shorthaired Pointer	PRJEB16012	SAMEA6249504
DO159	Doberman Pinscher	PRJEB16012	SAMEA4509491
DO242	Doberman Pinscher	PRJEB16012	SAMEA4505489
DO263	Doberman Pinscher	PRJEB16012	SAMEA4509492
DO665	Doberman Pinscher	PRJEB16012	SAMEA6249486
DP208	German Pinscher	PRJEB16012	SAMEA8157169
DQ1	Chinese Indigenous Dog	PRJNA233638	SAMN02585161
DQ10	Chinese Indigenous Dog	PRJNA233638	SAMN02585170
DQ2	Chinese Indigenous Dog	PRJNA233638	SAMN02585162
DQ3	Chinese Indigenous Dog	PRJNA233638	SAMN02585163
DQ4	Chinese Indigenous Dog	PRJNA233638	SAMN02585164
DQ5	Chinese Indigenous Dog	PRJNA233638	SAMN02585165
DQ6	Chinese Indigenous Dog	PRJNA233638	SAMN02585166
DQ7	Chinese Indigenous Dog	PRJNA233638	SAMN02585167
DQ8	Chinese Indigenous Dog	PRJNA233638	SAMN02585168
DQ9	Chinese Indigenous Dog	PRJNA233638	SAMN02585169
DS032	Mixed breed	PRJEB14110	SAMEA3994036
DS041	Mixed breed	PRJEB14110	SAMEA3994037
DS042	Mixed breed	PRJEB14110	SAMEA3994038
DS043	German Shepherd	PRJEB16012	SAMEA4506895
DS051	German Shepherd	PRJEB16012	SAMEA72802168
DS053	German Shepherd	PRJEB16012	SAMEA72802918
DS064	German Shepherd	PRJEB16012	SAMEA104283465
DS077	German Shepherd	PRJEB16012	SAMEA5657392
DS102	German Shepherd	PRJEB16012	SAMEA8157170
EB003	English Bulldog	PRJEB16012	SAMEA4848708
EL565	Elo	PRJEB16012	SAMEA4506890
EM003	Mastiff	PRJEB16012	SAMEA6249487
EMC	Mixed breed of Lapponian Herder origin	PRJEB16012	SAMEA6862938
EN091	Entlebucher Sennenhund	PRJEB16012	SAMEA4504828
EN154	Entlebucher Sennenhund	PRJEB16012	SAMEA4505497
EN221	Entlebucher Sennenhund	PRJEB16012	SAMEA4504829
EN247	Entlebucher Sennenhund	PRJEB16012	SAMEA4505498
EN261	Entlebucher Sennenhund	PRJEB16012	SAMEA4504830
EN262	Entlebucher Sennenhund	PRJEB16012	SAMEA4505499
EN263	Entlebucher Sennenhund	PRJEB16012	SAMEA4505500
EN264	Entlebucher Sennenhund	PRJEB16012	SAMEA4505501
EP003	English Springer Spaniel	PRJEB16012	SAMEA7297163
EU008	Eurasier	PRJEB6079	SAMEA2446720
EU035	Eurasier	PRJEB16012	SAMEA4506889
EU037	Eurasier	PRJEB16012	SAMEA8157171
FB046	French Bulldog	PRJEB13468	SAMEA3928146
FB065	French Bulldog	PRJEB16012	SAMEA4504835
FB081	French Bulldog	PRJEB16012	SAMEA6249479
FB100	French Bulldog	PRJEB16012	SAMEA6862974
FB149	French Bulldog	PRJEB16012	SAMEA8157172
FB150	French Bulldog	PRJEB16012	SAMEA8157173
FX001	Foxterrier	PRJEB16012	SAMEA7297164
FX002	Foxterrier	PRJEB16012	SAMEA6862971
FX003	Foxterrier	PRJEB16012	SAMEA6862972
FX004	Foxterrier	PRJEB16012	SAMEA6862973
GB001	Grand Basset Griffon Vendeen	PRJEB16012	SAMEA7297165
GP3	Great Pyrenees	PRJEB16012	SAMEA4848700
GR0855	Golden Retriever	PRJEB16012	SAMEA4504838
GR0859	Golden Retriever	PRJEB16012	SAMEA4506899
GR0860	Golden Retriever	PRJEB16012	SAMEA4509487
GR0892	Golden Retriever	PRJEB16012	SAMEA104016307
GR1078	Golden Retriever Mix	PRJEB16012	SAMEA104091572
GR1161	Golden Retriever	PRJEB16012	SAMEA4867924
GR1301	Golden Retriever	PRJEB16012	SAMEA6249503
GR1379	Golden Retriever	PRJEB16012	SAMEA8797074
GR1480	Golden Retriever	PRJEB16012	SAMEA8157174
GS1	German Shepherd	PRJNA233638	SAMN02585201
GS10	German Shepherd	PRJNA233638	SAMN02585210
GS104	Spitz (Grossspitz)	PRJEB16012	SAMEA104105252
GS2	German Shepherd	PRJNA233638	SAMN02585202
GS3	German Shepherd	PRJNA233638	SAMN02585203
GS4	German Shepherd	PRJNA233638	SAMN02585204
GS5	German Shepherd	PRJNA233638	SAMN02585205
GS6	German Shepherd	PRJNA233638	SAMN02585206
GS7	German Shepherd	PRJNA233638	SAMN02585207
GS8	German Shepherd	PRJNA233638	SAMN02585208
GS9	German Shepherd	PRJNA233638	SAMN02585209
GW004	German Wirehaired Pointer	PRJEB13468	SAMEA3928144
GW005	German Wirehaired Pointer	PRJEB16012	SAMEA6862962
GW026	German Wirehaired Pointer	PRJEB16012	SAMEA6862963
GW028	German Wirehaired Pointer	PRJEB16012	SAMEA6862964
GW029	German Wirehaired Pointer	PRJEB16012	SAMEA6862965
GW030	German Wirehaired Pointer	PRJEB16012	SAMEA6862966
GW041	German Wirehaired Pointer	PRJEB16012	SAMEA6862967
GW043	German Wirehaired Pointer	PRJEB16012	SAMEA6862977
GW045	German Wirehaired Pointer	PRJEB16012	SAMEA6862968
GW046	German Wirehaired Pointer	PRJEB16012	SAMEA6862969
GW048	German Wirehaired Pointer	PRJEB16012	SAMEA6862970
GY391	Greyhound	PRJEB16012	SAMEA4867933
GY393	Greyhound	PRJEB16012	SAMEA4848711
GY415	Greyhound	PRJEB16012	SAMEA4867932
GY416	Greyhound	PRJEB16012	SAMEA4848712
GY432	Greyhound	PRJEB16012	SAMEA104125118
GY453	Greyhound	PRJEB16012	SAMEA8157175
H29	Mixed breed of Siberian Husky origin	PRJEB16012	SAMEA6862939
H38	Mixed breed of Siberian Husky origin	PRJEB16012	SAMEA6862940
H59	Mixed breed of Siberian Husky origin	PRJEB16012	SAMEA6862941
HA008	Havanese	PRJEB16012	SAMEA5209177
HA009	Havanese	PRJEB16012	SAMEA5209178
HA010	Havanese	PRJEB16012	SAMEA5209179
HO013	Dutch Shepherd	PRJEB16012	SAMEA6862981
HT001	Heideterrier	PRJEB16012	SAMEA103135918
HW1706	Hovawart	PRJEB16012	SAMEA4506894
HW1872	Hovawart	PRJEB16012	SAMEA4848705
HW1979	Hovawart	PRJEB16012	SAMEA4867928
IH0001	Irish Wolfhound	PRJEB16012	SAMEA7198607
IST011	Irish Soft Coated Wheaten Terrier	PRJEB16012	SAMEA6249488
IST012	Irish Soft Coated Wheaten Terrier	PRJEB16012	SAMEA6249489
IST013	Irish Soft Coated Wheaten Terrier	PRJEB16012	SAMEA6249490
IST014	Irish Soft Coated Wheaten Terrier	PRJEB16012	SAMEA6249491
IST015	Irish Soft Coated Wheaten Terrier	PRJEB16012	SAMEA6249492
IST016	Irish Soft Coated Wheaten Terrier	PRJEB16012	SAMEA6249493
IST017	Irish Soft Coated Wheaten Terrier	PRJEB16012	SAMEA6249494
IST018	Irish Soft Coated Wheaten Terrier	PRJEB16012	SAMEA6249495
IST019	Irish Soft Coated Wheaten Terrier	PRJEB16012	SAMEA6258987
IST020	Irish Soft Coated Wheaten Terrier	PRJEB16012	SAMEA6249496
IT0390	Irish Terrier	PRJEB16012	SAMEA104283467
IT221	Irish Terrier	PRJEB13468	SAMEA3928141
IW015	Italian Greyhound (Italienisches Windspiel)	PRJEB16012	SAMEA8157176
JR0034	Jack Russell Terrier	PRJEB16012	SAMEA104125119
JR043	Jack Russell Terrier	PRJEB16012	SAMEA5209180
JR044	Jack Russell Terrier	PRJEB16012	SAMEA5209181
JR045	Jack Russell Terrier	PRJEB16012	SAMEA4867925
JR048	Jack Russell Terrier	PRJEB16012	SAMEA6249497
JR052	Jack Russell Terrier	PRJEB16012	SAMEA6249498
JT007	German Hunting Terrier	PRJEB16012	SAMEA104125120
JT011	German Hunting Terrier	PRJEB16012	SAMEA104283460
KB0003	Kerry Blue Terrier	PRJEB16012	SAMEA8157177
KEP033K1	Central Asian Shepherd dog	PRJNA380744	SRR5381785
KF042	Kromfohrländer	PRJEB6076	SAMEA2446055
KKH2684	Siberian Husky	PRJEB10823	SAMEA3539249
KM1	Kunming Dog	PRJNA233638	SAMN02585191
KM10	Kunming Dog	PRJNA233638	SAMN02585200
KM2	Kunming Dog	PRJNA233638	SAMN02585192
KM3	Kunming Dog	PRJNA233638	SAMN02585193
KM4	Kunming Dog	PRJNA233638	SAMN02585194
KM5	Kunming Dog	PRJNA233638	SAMN02585195
KM6	Kunming Dog	PRJNA233638	SAMN02585196
KM7	Kunming Dog	PRJNA233638	SAMN02585197
KM8	Kunming Dog	PRJNA233638	SAMN02585198
KM9	Kunming Dog	PRJNA233638	SAMN02585199
LA1869	Labrador Retriever	PRJEB16012	SAMEA4504834
LA2382	Mixed Breed (Labrador Retriever cross, Italy)	PRJEB16012	SAMEA104125075
LA2438	Labrador Retriever	PRJEB16012	SAMEA5209182
LA2439	Labrador Retriever	PRJEB16012	SAMEA5209183
LA2443	Labrador Retriever	PRJEB16012	SAMEA104091568
LA2928	Labrador Retriever	PRJEB16012	SAMEA6862915
LA3186	Labrador Retriever	PRJEB16012	SAMEA8157178
LA3222	Labrador Retriever	PRJEB16012	SAMEA8157179
LA882	Labrador Retriever	PRJEB5874	SAMEA2417015
LA900	Labrador Retriever	PRJEB5875	SAMEA2417016
LB0013	Leonberger	PRJEB16012	SAMEA4848665
LB0139	Leonberger	PRJEB16012	SAMEA4848666
LB0147	Leonberger	PRJEB16012	SAMEA4848690
LB0197	Leonberger	PRJEB16012	SAMEA4848676
LB0203	Leonberger	PRJEB16012	SAMEA4848667
LB0268	Leonberger	PRJEB16012	SAMEA4848668
LB0304	Leonberger	PRJEB16012	SAMEA4848669
LB0305	Leonberger	PRJEB16012	SAMEA4848670
LB0339	Leonberger	PRJEB16012	SAMEA4848671
LB0418	Leonberger	PRJEB16012	SAMEA4848672
LB0482	Leonberger	PRJEB16012	SAMEA4848673
LB0507	Leonberger	PRJEB16012	SAMEA4848691
LB0554	Leonberger	PRJEB16012	SAMEA4848692
LB0656	Leonberger	PRJEB16012	SAMEA4848693
LB0683	Leonberger	PRJEB16012	SAMEA4848674
LB111	Leonberger	PRJEB16012	SAMEA47266168
LB1848	Leonberger	PRJEB16012	SAMEA104656180
LB1919	Leonberger	PRJEB16012	SAMEA103935360
LB1961	Leonberger	PRJEB16012	SAMEA4848675
LB214	Leonberger	PRJEB16012	SAMEA4867936
LB3506	Leonberger	PRJEB16012	SAMEA4848684
LB3521	Leonberger	PRJEB16012	SAMEA4848694
LB3601	Leonberger	PRJEB16012	SAMEA4848685
LB3659	Leonberger	PRJEB16012	SAMEA4848686
LB3705	Leonberger	PRJEB16012	SAMEA4848687
LB3906	Leonberger	PRJEB16012	SAMEA4848688
LB4114	Leonberger	PRJEB16012	SAMEA7297166
LB4183	Leonberger	PRJEB16012	SAMEA4848689
LB4508	Leonberger	PRJEB16012	SAMEA7297167
LB4693	Leonberger	PRJEB16012	SAMEA4848695
LB5378	Leonberger	PRJEB16012	SAMEA4873254
LB5751	Leonberger	PRJEB16012	SAMEA4848699
LB6285	Leonberger	PRJEB16012	SAMEA7198610
LB6341	Leonberger	PRJEB16012	SAMEA7297169
LC003	Cão de Castro Laboreiro	PRJEB16012	SAMEA8797075
LE0051	Leonberger	PRJEB16012	SAMEA4848677
LE0237	Leonberger	PRJEB16012	SAMEA4848678
LE0269	Leonberger	PRJEB16012	SAMEA4848679
LE0512	Leonberger	PRJEB16012	SAMEA4848680
LE0738	Leonberger	PRJEB16012	SAMEA4848681
LE0896	Leonberger	PRJEB16012	SAMEA4848696
LE1294	Leonberger	PRJEB16012	SAMEA4848682
LE1301	Leonberger	PRJEB16012	SAMEA4848683
LE1302	Leonberger	PRJEB16012	SAMEA4848697
LE1355	Leonberger	PRJEB16012	SAMEA4848698
LE2450	Leonberger	PRJEB16012	SAMEA104656181
LE3212	Leonberger	PRJEB16012	SAMEA5657399
LH22	Mixed breed of Lapponian Herder origin	PRJEB16012	SAMEA6862942
LJ1	Chinese Indigenous Dog	PRJNA233638	SAMN02585171
LJ10	Chinese Indigenous Dog	PRJNA233638	SAMN02585180
LJ2	Chinese Indigenous Dog	PRJNA233638	SAMN02585172
LJ3	Chinese Indigenous Dog	PRJNA233638	SAMN02585173
LJ4	Chinese Indigenous Dog	PRJNA233638	SAMN02585174
LJ5	Chinese Indigenous Dog	PRJNA233638	SAMN02585175
LJ6	Chinese Indigenous Dog	PRJNA233638	SAMN02585176
LJ7	Chinese Indigenous Dog	PRJNA233638	SAMN02585177
LJ8	Chinese Indigenous Dog	PRJNA233638	SAMN02585178
LJ9	Chinese Indigenous Dog	PRJNA233638	SAMN02585179
LJP027A2	Swedish Vallhund	PRJNA394814	SRR5834681
LJP030A2	Swedish Vallhund	PRJNA394814	SRR5834680
LN048	Landseer	PRJEB9437	SAMEA3402917
LN47	Border Collie (sample mixup)	PRJEB16012	SAMEA4504821
LR1030	Lagotto Romagnolo	PRJEB16012	SAMEA4509490
LR1149	Lagotto Romagnolo	PRJEB16012	SAMEA4867929
LR1194	Lagotto Romagnolo	PRJEB16012	SAMEA8157180
LR1248	Lagotto Romagnolo	PRJEB16012	SAMEA5657400
LR1268	Lagotto Romagnolo	PRJEB16012	SAMEA6862927
LR1277	Lagotto Romagnolo	PRJEB16012	SAMEA8157181
LR1278	Lagotto Romagnolo	PRJEB16012	SAMEA6862954
LR1279	Lagotto Romagnolo	PRJEB16012	SAMEA8157182
LR1280	Lagotto Romagnolo	PRJEB16012	SAMEA8157183
LR1310	Lagotto Romagnolo	PRJEB16012	SAMEA6862975
LR390	Lagotto Romagnolo	PRJEB13468	SAMEA3928142
LR416	Lagotto Romagnolo	PRJEB16012	SAMEA4867935
LR433	Lagotto Romagnolo	PRJEB16012	SAMEA4505491
LR460	Lagotto Romagnolo	PRJEB16012	SAMEA8157184
LR494	Lagotto Romagnolo	PRJEB16012	SAMEA4505494
LR538	Lagotto Romagnolo	PRJEB16012	SAMEA104283462
LR613	Lagotto Romagnolo	PRJEB16012	SAMEA8157185
LR654	Lagotto Romagnolo	PRJEB16012	SAMEA104283463
LR753	Lagotto Romagnolo	PRJEB16012	SAMEA4504833
MA008	Malinois	PRJEB16012	SAMEA4504823
MA0163	Malinois	PRJEB16012	SAMEA104032048
MA094	Malinois	PRJEB16012	SAMEA4504826
MA142	Malinois	PRJEB16012	SAMEA104125121
MA152	Malinois	PRJEB16012	SAMEA4506898
MA324	Malinois	PRJEB16012	SAMEA104125122
MA437	Malinois	PRJEB16012	SAMEA4848704
MA446	Malinois	PRJEB16012	SAMEA6249499
MA471	Malinois	PRJEB16012	SAMEA6249500
MA509	Malinois	PRJEB16012	SAMEA7198602
MA546	Malinois	PRJEB16012	SAMEA8157186
MA563	Malinois	PRJEB16012	SAMEA8157187
MB003	Miniature Bull terrier	PRJEB16012	SAMEA4867920
MI016	Mixed Breed	PRJEB16012	SAMEA4506893
MI020	Mixed breed	PRJEB16012	SAMEA4867919
MI025	mixed breed	PRJEB16012	SAMEA4867923
MI034	Mixed Breed (German Shepherd x Malinois)	PRJEB16012	SAMEA6862986
MI035	Mixed Breed	PRJEB16012	SAMEA8797077
MI038	Mixed Breed (Border Collie x Labrador)	PRJEB16012	SAMEA8797078
MP011	Pug	PRJEB16012	SAMEA5209184
MP012	Pug	PRJEB16012	SAMEA5209185
MP013	Pug	PRJEB16012	SAMEA5209186
MP166	Miniature Poodle	PRJEB16012	SAMEA6862943
MP167	Miniature Poodle	PRJEB16012	SAMEA6862944
MP168	Miniature Poodle	PRJEB16012	SAMEA6862945
MP170	Miniature Poodle	PRJEB16012	SAMEA6862946
MS32	Miniature Schnauzer	PRJEB16012	SAMEA5059499
MS77	Miniature Schnauzer	PRJEB16012	SAMEA5059500
NF187000	Newfoundland	PRJEB16012	SAMEA4848701
NF492	Newfoundland	PRJEB16012	SAMEA104500411
NW062	Norwich Terrier	PRJEB16012	SAMEA104091550
NW152	Norwich Terrier	PRJEB16012	SAMEA104091551
NW206	Norwich Terrier	PRJEB16012	SAMEA104091552
NW255	Norwich Terrier	PRJEB16012	SAMEA104091553
OS001	Old English Sheepdog	PRJEB16012	SAMEA4504841
PA073	Papillon	PRJEB16012	SAMEA5209187
PA074	Papillon	PRJEB16012	SAMEA5209188
PA075	Papillon	PRJEB16012	SAMEA5209189
PE002	Perro de Agua Español	PRJEB7903	SAMEA3164479
PG002__BGVP_17289	Petit Basset Griffon Vendeen	PRJEB11835	SAMEA3723573
PG003	Petit Basset Griffon Vendeen	PRJEB16012	SAMEA5209190
PG004	Petit Basset Griffon Vendeen	PRJEB16012	SAMEA5209191
PG005	Petit Basset Griffon Vendeen	PRJEB16012	SAMEA5209192
PL116	Poodle	PRJEB16012 / PRJEB30571	SAMEA4506891 / SAMEA5205225
PL148	Miniature Poodle	PRJEB16012	SAMEA5209193
PL150	Poodle	PRJNA503969	SAMN10386546
PL152	Poodle	PRJNA503969	SAMN10386547
PL153	Poodle	PRJNA503969	SAMN10386548
PL154	Poodle	PRJNA503969	SAMN10386549
PL156	Poodle	PRJNA503969	SAMN10386550
PL157	Poodle	PRJNA503969	SAMN10386551
PL158	Poodle	PRJNA503969	SAMN10386552
PL159	Poodle	PRJNA503969	SAMN10386553
PL160	Poodle	PRJNA503969	SAMN10386554
PL161	Poodle	PRJNA503969	SAMN10386555
PL162	Poodle	PRJNA503969	SAMN10386556
PL163	Poodle	PRJNA503969	SAMN10386557
PL164	Poodle	PRJNA503969	SAMN10386558
PL165	Poodle	PRJNA503969	SAMN10386559
PW05	Portuguese Water Dog	PRJEB16012	SAMEA6245499
PW06	Portuguese Water Dog	PRJEB16012	SAMEA6245500
PW07	Portuguese Water Dog	PRJEB16012	SAMEA6245501
PWD	Portuguese Water Dog	PRJEB16012	SAMEA6862947
RO015	Rottweiler	PRJEB16012	SAMEA6249501
RO2	Rottweiler	PRJEB7735	SAMEA3121337
ROS.gDNA.SID00115	Pug	PRJEB17926	SAMEA104389202
ROS.gDNA.SID00400	Whippet	PRJEB17926	SAMEA104389243
ROS.gDNA.SID00434	Bichon Frisé	PRJEB17926	SAMEA104388844
ROS.gDNA.SID00436	Pug	PRJEB17926	SAMEA104389203
ROS.gDNA.SID00437	Pug	PRJEB17926	SAMEA104389204
ROS.gDNA.SID00439	Pug	PRJEB17926	SAMEA104389205
ROS.gDNA.SID00464	Bichon Frisé	PRJEB17926	SAMEA104388845
ROS.gDNA.SID00488	Pug	PRJEB17926	SAMEA104389206
ROS.gDNA.SID00539	Bichon Frisé	PRJEB17926	SAMEA104388846
ROS.gDNA.SID00860	Saluki	PRJEB17926	SAMEA104389241
ROS.gDNA.SID01138	Kerry Blue Terrier	PRJEB17926	SAMEA104389201
ROS.gDNA.SID01166	Pug	PRJEB17926	SAMEA104389207
ROS.gDNA.SID01169	Pug	PRJEB17926	SAMEA104389208
ROS.gDNA.SID01170	Pug	PRJEB17926	SAMEA104389209
ROS.gDNA.SID01171	Pug	PRJEB17926	SAMEA104389210
ROS.gDNA.SID01221	Pug	PRJEB17926	SAMEA104389211
ROS.gDNA.SID01232	Bull Terrier	PRJEB17926	SAMEA104388849
ROS.gDNA.SID01237	Pug	PRJEB17926	SAMEA104389212
ROS.gDNA.SID01578	Shih Tzu	PRJEB17926	SAMEA104389242
ROS.gDNA.SID01682	Pug	PRJEB17926	SAMEA104389213
ROS.gDNA.SID01737	Dogue de Bordeaux	PRJEB17926	SAMEA104388851
ROS.gDNA.SID01899	Japanese Chin	PRJEB17926	SAMEA104388850
ROS.gDNA.SID01940	Airedale Terrier	PRJEB17926	SAMEA104388843
ROS.gDNA.SID02492	Pug	PRJEB17926	SAMEA104389237
ROS.gDNA.SID02765	Pug	PRJEB17926	SAMEA104389238
ROS.gDNA.SID02770	Pug	PRJEB17926	SAMEA104389239
ROS.gDNA.SID02832	Pug	PRJEB17926	SAMEA104389240
ROS.gDNA.SID02920	Bichon Frisé	PRJEB17926	SAMEA104388847
ROS.gDNA.SID03009	American Bulldog	PRJEB17926	SAMEA104388842
ROS.gDNA.SID03103	Brussels Griffon	PRJEB17926	SAMEA104388848
RR098	Rhodesian Ridgeback	PRJEB16012	SAMEA104091554
RR123	Rhodesian Ridgeback	PRJEB16012	SAMEA4504822
RR224	Rhodesian Ridgeback	PRJEB16012	SAMEA4505495
RR320	Rhodesian Ridgeback	PRJNA357866	SRR5117439
SC001	Scottish Terrier	PRJEB16012	SAMEA6862960
SC022	Scottish Terrier	PRJEB16012	SAMEA6862961
SG005	Sloughi	PRJEB13468	SAMEA3928143
SG006	Sloughi	PRJEB16012	SAMEA4506885
SG008	Sloughi	PRJEB16012	SAMEA4506888
SH008	Greater Swiss Mountain Dog	PRJEB16012	SAMEA4504837
SH010	Greater Swiss Mountain Dog	PRJEB16012 / PRJEB30571	SAMEA104658569 / SAMEA5205218
SH011	Greater Swiss Mountain Dog	PRJEB16012 / PRJEB30571	SAMEA104658570 / SAMEA5205219
SH012	Greater Swiss Mountain Dog	PRJEB16012 / PRJEB30571	SAMEA104656182 / SAMEA5205220
SH013	Greater Swiss Mountain Dog	PRJEB16012 / PRJEB30571	SAMEA104656183 / SAMEA5205226
SH050	Greater Swiss Mountain Dog	PRJEB16012	SAMEA6249502
SH061	Greater Swiss Mountain Dog	PRJEB16012	SAMEA7297170
SID00101	Cavalier King Charles Spaniel	PRJEB17926	SAMEA104379882
SID00110	American bulldog	PRJEB17926	SAMEA104379885
SID00122	Boxer	PRJEB17926	SAMEA104379880
SID00142	Affenpinscher	PRJEB17926	SAMEA104379879
SID00176	Bullmastiff	PRJEB17926	SAMEA104379881
SID00225	French Bulldog	PRJEB17926	SAMEA104379883
SID00354	Dogue de Bordeaux	PRJEB17926	SAMEA104379884
SL006	Saluki	PRJEB16012	SAMEA4504825
SM010	Standard Schnauzer	PRJEB16012	SAMEA104500412
SP018	Shar Pei	PRJEB16012	SAMEA7198604
SP019	Shar Pei	PRJEB16012	SAMEA7198605
SP020	Shar Pei	PRJEB16012	SAMEA7198612
SP045	Standard Poodle	PRJEB16012	SAMEA6862948
SP059	Standard Poodle	PRJEB16012	SAMEA6862949
SP060	Standard Poodle	PRJEB16012	SAMEA6862950
SR262	Saarlos Wolfdog	PRJEB16012	SAMEA8157188
SRR2094385	Beagle	PRJNA288568	SRR2094385
SRR2094386	Beagle	PRJNA288568	SRR2094386
SRR2094387	Border Collie	PRJNA288568	SRR2094387
SRR2094388	Border Collie	PRJNA288568	SRR2094388
SRR2094389	Border Collie	PRJNA288568	SRR2094389
SRR2094390	Brittany Spaniel	PRJNA288568	SRR2094390
SRR2094392	Chow Chow	PRJNA288568	SRR2094392
SRR2094393	Clumber Spaniel	PRJNA288568	SRR2094393
SRR2094396	English Mastiff	PRJNA288568	SRR2094396
SRR2094398	English Pointer	PRJNA288568	SRR2094398
SRR2094399	Greyhound	PRJNA288568	SRR2094399
SRR2094400	Irish Wolfhound	PRJNA288568	SRR2094400
SRR2094401	Italian Greyhound	PRJNA288568	SRR2094401
SRR2094404	Pug	PRJNA288568	SRR2094404
SRR2094405	Pug	PRJNA288568	SRR2094405
SRR2094406	Pug	PRJNA288568	SRR2094406
SRR2094407	Rhodesian Ridgeback	PRJNA288568	SRR2094407
SRR2094408	Saluki	PRJNA288568	SRR2094408
SRR2094409	Scottish Terrier	PRJNA288568	SRR2094409
SRR2095316	English Cocker Spaniel	PRJNA288568	SRR2095316
SRR2095317	Cavalier King Charles Spaniel	PRJNA288568	SRR2095317
SRR2095318	Doberman Pinscher	PRJNA288568	SRR2095318
SRR2095320	Golden Retriever	PRJNA288568	SRR2095320
SRR2095321	Great Pyrenees	PRJNA288568	SRR2095321
SRR2095322	Italian Greyhound	PRJNA288568	SRR2095322
SRR2095323	Labrador Retriever	PRJNA288568	SRR2095323
SRR2095324	Portuguese Pointer	PRJNA288568	SRR2095324
SRR2095325	Poodle	PRJNA288568	SRR2095325
SRR2095330	West Highland White Terrier	PRJNA288568	SRR2095330
SRR2095362	Wolf	PRJNA288568	SRR2095362
SRR2095368	Belgian Shepherd	PRJNA288568	SRR2095368
SRR2095457	Belgian Shepherd	PRJNA288568	SRR2095457
SRR2095463	Bernese Mountain Dog	PRJNA288568	SRR2095463
SRR2095469	Bloodhound	PRJNA288568	SRR2095469
SRR2095477	English bulldog	PRJNA288568	SRR2095477
SRR2095478	Chihuahua	PRJNA288568	SRR2095478
SRR2095479	English Cocker Spaniel	PRJNA288568	SRR2095479
SRR2095480	Flat Coated Retriever	PRJNA288568	SRR2095480
SRR2095487	Flat Coated Retriever	PRJNA288568	SRR2095487
SRR2095497	Great Dane	PRJNA288568	SRR2095497
SRR2095500	Pekingese	PRJNA288568	SRR2095500
SRR2095501	Rottweiler	PRJNA288568	SRR2095501
SRR2095502	St. Bernard	PRJNA288568	SRR2095502
SRR2095503	Saluki	PRJNA288568	SRR2095503
SRR2095504	Shetland Sheepdog	PRJNA288568	SRR2095504
SRR2095539	Siberian Husky	PRJNA288568	SRR2095539
SRR2095540	Poodle	PRJNA288568	SRR2095540
SRR2827577	Chinese Indigenous Dog	PRJNA266585	SRR2827577
SRR2827578	Chinese Indigenous Dog	PRJNA266585	SRR2827578
SRR2827579	Chinese Indigenous Dog	PRJNA266585	SRR2827579
SRR2827580	Chinese Indigenous Dog	PRJNA266585	SRR2827580
SRR2827581	Chinese Indigenous Dog	PRJNA266585	SRR2827581
SRR2827582	Chinese Indigenous Dog	PRJNA266585	SRR2827582
SRR2827583	Chinese Indigenous Dog	PRJNA266585	SRR2827583
SRR2827584	Chinese Indigenous Dog	PRJNA266585	SRR2827584
SRR2827585	Chinese Indigenous Dog	PRJNA266585	SRR2827585
SRR2827586	Chinese Indigenous Dog	PRJNA266585	SRR2827586
SRR2827587	Chinese Indigenous Dog	PRJNA266585	SRR2827587
SRR2827588	Chinese Indigenous Dog	PRJNA266585	SRR2827588
SRR2827589	Chinese Indigenous Dog	PRJNA266585	SRR2827589
SRR2827590	Chinese Indigenous Dog	PRJNA266585	SRR2827590
SRR2827591	Nigerian Indigenous Dog	PRJNA266585	SRR2827591
SRR2827592	Nigerian Indigenous Dog	PRJNA266585	SRR2827592
SRR2827593	Nigerian Indigenous Dog	PRJNA266585	SRR2827593
SRR2827594	Nigerian Indigenous Dog	PRJNA266585	SRR2827594
SRR2827595	Vietnamese Indigenous Dog	PRJNA266585	SRR2827595
SRR2827596	Vietnamese Indigenous Dog	PRJNA266585	SRR2827596
SRR2827597	Vietnamese Indigenous Dog	PRJNA266585	SRR2827597
SRR2827598	Vietnamese Indigenous Dog	PRJNA266585	SRR2827598
SRR2827599	Vietnamese Indigenous Dog	PRJNA266585	SRR2827599
SRR2827604	Jamthund	PRJNA266585	SRR2827604
SRR2827605	Jamthund	PRJNA266585	SRR2827605
SRR2827606	Chinese Indigenous Dog	PRJNA266585	SRR2827606
SRR2827607	Chinese Indigenous Dog	PRJNA266585	SRR2827607
SRR4011154	Shetland Sheepdog	PRJNA338147	SRR4011154
SRR4011155	German Shepherd	PRJNA338147	SRR4011155
SRR5190659	Collie	PRJNA338147	SRR5190659
SRR5190660	Collie	PRJNA338147	SRR5190660
SRR5190661	Collie	PRJNA338147	SRR5190661
SRR5190662	Collie	PRJNA338147	SRR5190662
SRR5190663	Collie	PRJNA338147	SRR5190663
SRR7120157	Dalmatian dog	PRJNA448733	SRR7120157
SRR7120158	Flat Coated Retriever	PRJNA448733	SRR7120158
SRR7120159	Fonni Dog	PRJNA448733	SRR7120159
SRR7120196	Portuguese Water Dog	PRJNA448733	SRR7120196
SRR7120198	Portuguese Water Dog	PRJNA448733	SRR7120198
SRR7120199	Portuguese Water Dog	PRJNA448733	SRR7120199
SRR7120200	Portuguese Water Dog	PRJNA448733	SRR7120200
SRR7120201	Portuguese Water Dog	PRJNA448733	SRR7120201
SRR7120203	Portuguese Water Dog	PRJNA448733	SRR7120203
SRR7120204	Rottweiler	PRJNA448733	SRR7120204
SRR7120205	Rottweiler	PRJNA448733	SRR7120205
SRR7120206	Rottweiler	PRJNA448733	SRR7120206
SRR7120207	Rottweiler	PRJNA448733	SRR7120207
SRR7120208	Rottweiler	PRJNA448733	SRR7120208
SRR7120211	Samoyed	PRJNA448733	SRR7120211
SRR7120212	Scottish Terrier	PRJNA448733	SRR7120212
SRR7120213	Scottish Terrier	PRJNA448733	SRR7120213
SRR7120232	West Highland White Terrier	PRJNA448733	SRR7120232
SRR7120233	West Highland White Terrier	PRJNA448733	SRR7120233
SRR7120234	West Highland White Terrier	PRJNA448733	SRR7120234
SRS661486	Wolf Great Lakes	PRJNA255370	SAMN02921310
SRS661488	Wolf Iran	PRJNA255370	SAMN02921312
SRS661492	Wolf Portugal	PRJNA255370	SAMN02921316
SRS661495	Wolf Spain	PRJNA255370	SAMN02921319
SRS661496	Wolf Yellowstone	PRJNA255370	SAMN02921320
SRS713815	Chinese Crested dog	PRJNA261736	SAMN03075611
SRS732550	Pembroke Welsh Corgi	PRJNA263947	SAMN03145703
SRS732551	Pembroke Welsh Corgi	PRJNA263947	SAMN03145704
SRS833812	Black Russian Terrier	PRJNA263947	SAMN03323668
SRS932138	Shetland Sheepdog	PRJNA263947	SAMN03580413
SRS932143	Standard Poodle	PRJNA263947	SAMN03580408
SRS932144	Border Terrier	PRJNA263947	SAMN03580407
SRS932145	Tibetan Terrier	PRJNA263947	SAMN03580406
SRS932146	Berger Picard	PRJNA263947	SAMN03580405
SRS932147	Jack Russell Terrier	PRJNA263947	SAMN03580404
SRS932148	Tibetan Terrier	PRJNA263947	SAMN03580403
SRS932149	Golden Retriever	PRJNA263947	SAMN03580402
SRS932150	Scottish Deerhound	PRJNA263947	SAMN03580401
SRS932151	Jack Russell Terrier	PRJNA263947	SAMN03580400
SRS932152	Labrador Retriever	PRJNA263947	SAMN03580399
SRS932153	West Highland White Terrier	PRJNA263947	SAMN03580398
SRS932157	Scottish Terrier	PRJNA263947	SAMN03580394
SRS932158	Basenji	PRJNA263947	SAMN03580393
SRS932159	German Shepherd	PRJNA263947	SAMN03580392
SRS932160	English Springer Spaniel	PRJNA263947	SAMN03580391
SRS932161	Airedale Terrier	PRJNA263947	SAMN03580390
SRS932162	Border Collie	PRJNA263947	SAMN03580389
SRS932163	Portuguese Podengo	PRJNA263947	SAMN03580388
SRS932164	Kerry Blue Terrier	PRJNA263947	SAMN03580387
SS004	Shetland Sheepdog	PRJEB16012	SAMEA104091573
SS096	Shetland Sheepdog	PRJEB16012	SAMEA4867921
SS109	Shetland Sheepdog	PRJEB16012	SAMEA8797076
STB24	St. Bernard	PRJEB16012	SAMEA4848702
STB27	St. Bernard	PRJEB16012	SAMEA4848703
SV_25951	Swedish Vallhund	PRJEB21485	ERR2834335
SY001	Alaskan Husky (not purebred)	PRJEB9590	SAMEA3449656
SY018	Alaskan Husky (not purebred)	PRJEB9591	SAMEA3449657
SY046	Siberian Husky	PRJEB16012	SAMEA104091559
SZ004	Shih Tzu	PRJNA448733	SRR7120214
SZ005	Shih Tzu	PRJEB16012	SAMEA5209194
SZ006	Shih Tzu	PRJEB16012	SAMEA5209195
TA001	Airedale Terrier	PRJEB16012	SAMEA4506896
TA006	Airedale Terrier	PRJEB16012	SAMEA6862951
TM001	Tamaskan	PRJEB16012	SAMEA6862952
TM1	Tibetan Mastiff	PRJNA233638	SAMN02570458
TM10	Tibetan Mastiff	PRJNA233638	SAMN02585160
TM2	Tibetan Mastiff	PRJNA233638	SAMN02585152
TM3	Tibetan Mastiff	PRJNA233638	SAMN02585153
TM4	Tibetan Mastiff	PRJNA233638	SAMN02585154
TM5	Tibetan Mastiff	PRJNA233638	SAMN02585155
TM6	Tibetan Mastiff	PRJNA233638	SAMN02585156
TM7	Tibetan Mastiff	PRJNA233638	SAMN02585157
TM8	Tibetan Mastiff	PRJNA233638	SAMN02585158
TM9	Tibetan Mastiff	PRJNA233638	SAMN02585159
TS0001	Sealyham Terrier	PRJEB16012	SAMEA7198611
V_23005	Vizsla (smooth coat)	PRJEB12340	ERR1210830
WE006	Weimaraner	PRJEB16012	SAMEA4506902
WE008	Weimaraner	PRJEB16012	SAMEA104283466
WE012	Weimaraner	PRJEB16012	SAMEA6862955
WE015	Weimaraner	PRJEB16012	SAMEA6862956
WH083	Whippet	PRJEB16012	SAMEA4506886
WH118	Whippet	PRJEB16012	SAMEA5657394
WH122	Whippet	PRJEB16012	SAMEA5657395
WH129	Whippet	PRJEB16012	SAMEA7198608
WO001_895	wolf	PRJEB16012	SAMEA104091563
WO002_732	wolf	PRJEB16012	SAMEA104091564
WO003_636	wolf	PRJEB16012	SAMEA104091565
WW174	West Highland White Terrier	PRJEB16012	SAMEA4506901
WW361	West Highland White Terrier	PRJEB16012	SAMEA4504842
WW362	West Highland White Terrier	PRJEB16012	SAMEA4509489
WW363	West Highland White Terrier	PRJEB16012	SAMEA4504843
WW364	West Highland White Terrier	PRJEB16012	SAMEA4504836
WW558	West Highland White Terrier	PRJEB16012	SAMEA104091561
WW635	West Highland White Terrier	PRJEB16012	SAMEA5059501
WW637	West Highland White Terrier	PRJEB16012	SAMEA5059502
WW639	West Highland White Terrier	PRJEB16012	SAMEA5059503
WW64	West Highland White Terrier	PRJEB13723	SAMEA3940300
WW640	West Highland White Terrier	PRJEB16012	SAMEA5059504
WW641	West Highland White Terrier	PRJEB16012	SAMEA5059505
WW642	West Highland White Terrier	PRJEB16012	SAMEA5059506
WW643	West Highland White Terrier	PRJEB16012	SAMEA5059507
WW644	West Highland White Terrier	PRJEB16012	SAMEA5059508
WW645	West Highland White Terrier	PRJEB16012	SAMEA5059509
WW646	West Highland White Terrier	PRJEB16012	SAMEA5059510
WW647	Dutch Shepherd	PRJEB16012	SAMEA5059511
WW665	West Highland White Terrier	PRJEB16012	SAMEA4848706
WW706	West Highland White Terrier	PRJEB16012	SAMEA8157189
WW707	West Highland White Terrier	PRJEB16012	SAMEA8157190
WW708	West Highland White Terrier	PRJEB16012	SAMEA8157191
YJ1	Chinese Indigenous Dog	PRJNA233638	SAMN02585181
YJ2	Chinese Indigenous Dog	PRJNA233638	SAMN02585182
YJ3	Chinese Indigenous Dog	PRJNA233638	SAMN02585183
YJ4	Chinese Indigenous Dog	PRJNA233638	SAMN02585184
YJ5	Chinese Indigenous Dog	PRJNA233638	SAMN02585185
YJ6	Chinese Indigenous Dog	PRJNA233638	SAMN02585186
YJ7	Chinese Indigenous Dog	PRJNA233638	SAMN02585187
YJ9	Chinese Indigenous Dog	PRJNA233638	SAMN02585189
YT003	Yorkshire Terrier	PRJEB13468	SAMEA3928145
YT024	Yorkshire Terrier	PRJNA448733	SRR7120237
YT025	Yorkshire Terrier	PRJNA448733	SRR7120238
YT027	Yorkshire Terrier	PRJNA448733	SRR7120239
YT028	Yorkshire Terrier	PRJEB16012	SAMEA5209196
YT030	Yorkshire Terrier	PRJNA448733	SRR7120241
YT031	Yorkshire Terrier	PRJNA448733	SRR7120242
YT032	Yorkshire Terrier	PRJEB16012	SAMEA5209197
YT033	Yorkshire Terrier	PRJEB16012	SAMEA5209198
YT036	Yorkshire Terrier	PRJNA448733	SRR7120244
YT040	Yorkshire Terrier	PRJNA448733	SRR7120246
YT041	Yorkshire Terrier	PRJNA448733	SRR7120247
YT044	Yorkshire Terrier	PRJNA448733	SRR7120248
YT046	Yorkshire Terrier	PRJNA448733	SRR7120249
YT048	Yorkshire Terrier	PRJNA448733	SRR7120250
YT049	Yorkshire Terrier	PRJNA448733	SRR7120251
YT050	Yorkshire Terrier	PRJNA448733	SRR7120252
YT052	Yorkshire Terrier	PRJNA448733	SRR7120253
YT053	Yorkshire Terrier	PRJNA448733	SRR7120254
YT055	Yorkshire Terrier	PRJNA448733	SRR7120256
YT056	Yorkshire Terrier	PRJNA448733	SRR7120257
YT058	Yorkshire Terrier	PRJNA448733	SRR7120259
YT059	Yorkshire Terrier	PRJNA448733	SRR7120260
YT062	Yorkshire Terrier	PRJNA448733	SRR7120262
YT065	Yorkshire Terrier	PRJNA448733	SRR7120264
YT066	Yorkshire Terrier	PRJNA448733	SRR7120265
YT067	Yorkshire Terrier	PRJNA448733	SRR7120266
YT068	Yorkshire Terrier	PRJNA448733	SRR7120267
YT070	Yorkshire Terrier	PRJNA448733	SRR7120269
YT073	Yorkshire Terrier	PRJNA448733	SRR7120272
YT074	Yorkshire Terrier	PRJNA448733	SRR7120273
YT076	Yorkshire Terrier	PRJNA448733	SRR7120274
YT077	Yorkshire Terrier	PRJNA448733	SRR7120275
YT078	Yorkshire Terrier	PRJNA448733	SRR7120276
YT079	Yorkshire Terrier	PRJNA448733	SRR7120277
YT080	Yorkshire Terrier	PRJNA448733	SRR7120278
YT081	Yorkshire Terrier	PRJEB16012	SAMEA5209199
YT082	Yorkshire Terrier	PRJNA448733	SRR7120279
YT085	Yorkshire Terrier	PRJEB16012	SAMEA5209200
YT087	Yorkshire Terrier	PRJNA448733	SRR7120283
YT088	Yorkshire Terrier	PRJNA448733	SRR7120284
YT089	Yorkshire Terrier	PRJNA448733	SRR7120285
YT090	Yorkshire Terrier	PRJNA448733	SRR7120286
YT091	Yorkshire Terrier	PRJNA448733	SRR7120287
YT092	Yorkshire Terrier	PRJNA448733	SRR7120288
YT094	Yorkshire Terrier	PRJNA448733	SRR7120290
YT095	Yorkshire Terrier	PRJNA448733	SRR7120291
YT096	Yorkshire Terrier	PRJNA448733	SRR7120292
YT097	Yorkshire Terrier	PRJNA448733	SRR7120293
YT098	Yorkshire Terrier	PRJNA448733	SRR7120294
YT101	Yorkshire Terrier	PRJNA448733	SRR7120296
YT102	Yorkshire Terrier	PRJNA448733	SRR7120297
YT103	Yorkshire Terrier	PRJNA448733	SRR7120298
YT104	Yorkshire Terrier	PRJNA448733	SRR7120299
YT105	Yorkshire Terrier	PRJNA448733	SRR7120300
YT106	Yorkshire Terrier	PRJNA448733	SRR7120301
YT108	Yorkshire Terrier	PRJNA448733	SRR7120303
YT109	Yorkshire Terrier	PRJNA448733	SRR7120304
YT110	Yorkshire Terrier	PRJNA448733	SRR7120305
YT111	Yorkshire Terrier	PRJNA448733	SRR7120306
YT112	Yorkshire Terrier	PRJNA448733	SRR7120307
ZS14	Landseer (sample mixup)	PRJEB7734	SAMEA3121328
ZS14_2	Pomeranian	PRJEB16012	SAMEA4506892
ZS554	Pomeranian	PRJEB16012	SAMEA5209201
ZS555	Pomeranian	PRJEB16012	SAMEA5209203
ZS623	Pomeranian	PRJEB16012	SAMEA7198603
ZS653	Pomeranian	PRJEB16012	SAMEA8157192
ZZ023	Pomeranian	PRJEB16012	SAMEA5209202
ZZ024	Miniature Schnauzer	PRJEB16012	SAMEA5059514
ZZ025	Miniature Schnauzer	PRJEB16012	SAMEA5059515
ZZ026	Miniature Schnauzer	PRJEB16012	SAMEA5059516
ZZ028	Miniature Schnauzer	PRJEB16012	SAMEA5059517
ZZ029	Miniature Schnauzer	PRJEB16012	SAMEA5059518
ZZ030	Miniature Schnauzer	PRJEB16012	SAMEA5059519
ZZ031	Miniature Schnauzer	PRJEB16012	SAMEA5059520
ZZ032	Miniature Schnauzer	PRJEB16012	SAMEA5059521
ZZ034	Miniature Schnauzer	PRJEB16012	SAMEA5059522
ZZ035	Miniature Schnauzer	PRJEB16012	SAMEA5059523
ZZ16_MS06	Miniature Schnauzer	PRJEB16012	SAMEA3444493
ZZ17_MS07	Miniature Schnauzer	PRJEB16012	SAMEA1066474
ZZ18_MS08	Miniature Schnauzer	PRJEB16012	SAMEA1066475
ZZ19_MS09	Miniature Schnauzer	PRJEB16012	SAMEA1066476
