# Supplementary material for: PRKG2 Splice Site Variant in Dogo Argentino Dogs with Disproportionate Dwarfism
Source: Genes (Basel). 2021 Sep 24;12(10):1489. doi: 10.3390/genes12101489 (PMC8535654; doi:10.3390/genes12101489)
Supplement: Supplementary file 1 [file genes-12-01489-s001.zip › Table_S4_Morphometric_Measurements.xlsx]

## Sheet: Sheet1
Table S4. Cephalometric measurements calculated by using Computed Tomography 3D reconstructions of the affected dog DG0003 at two years of age.
No.	Parameter	Value
1	Cranial length (CL): Inion–nasion.	118.9 mm
2	Cranial breadth (CB): Euryon–euryon.	64.8 mm
3	Cranial index (CI): Ratio of maximum breadth of neurocranium (euryon–euryon) to maximum length (inion–nasion).	ratio between 2 and 1 : 0.544
4	Skull length 1 (SL1): Prosthion–inion.	223.9 mm
5	Skull length 2 (SL2): Prosthion–basion.	189.1 mm
6	Skull breadth (SB): Zygion–zygion.	147.9 mm
7	Skull index (SI): Ratio of maximum breadth of whole skull (zygion–zygion) to maximum length (inion–prosthion).	ratio between 6 and 1 : 0.66
8	Facial length 1 (FL1): Most rostral point of nasal bone to nasion.	67 mm
9	Facial length 2 (FL2): Prosthion–nasion.	112.3 mm
10	Facial breadth (FB): Zygion–zygion.	147.9 mm
11	Facial index (FI): Ratio of maximum breadth of whole skull (zygion–zygion) to maximum length of facial bones (nasion–prosthion).	ratio between 10 and 9 : 1.31
Basion	caudal margin of basiocciput in middle of intercondylar incisure
Euryon	most lateral part of braincase on either parietal bone
Inion	central surface point on external occipital protuberance
Nasion	junction on medial plane on the left and right nasofrontal sutures
Prosthion	rostral end of interincisive suture, located between roots of upper central incisor teeth
Zygion	most lateral point of zygomatic arch
